# Supplementary material for: Visible-light mediated catalytic asymmetric radical deuteration at non-benzylic positions
Source: PubMed Central journal article supplement (PMC9343372; doi:10.1038/s41467-022-32238-8), 2022-08-01
Supplement: 41467_2022_32238_MOESM1_ESM.pdf [file 41467_2022_32238_MOESM1_ESM.pdf]

# SUPPLEMENTARY INFORMATION

## Visible-Light Mediated Catalytic Asymmetric Radical Deuteration at Non-Benzyllic Positions

Qinglong Shi,<sup>1,†</sup> Meichen Xu,<sup>1,†</sup> Rui Chang,<sup>1</sup> Devenderan Ramanathan,<sup>1</sup> Beatriz Peñín,<sup>2</sup> Ignacio Funes-Ardoiz,<sup>2,\*</sup> and Juntao Ye<sup>1,\*</sup>

<sup>1</sup>Shanghai Key Laboratory for Molecular Engineering of Chiral Drugs, Frontiers Science Center for Transformative Molecules, School of Chemistry and Chemical Engineering, Shanghai Jiao Tong University, Shanghai 200240, China.

<sup>2</sup>Department of Chemistry, Centro de Investigación en Síntesis Química (CISQ), Universidad de La Rioja, Madre de Dios 53, 26006 Logroño, Spain.

<sup>†</sup>These authors contributed equally to this work.

\*Corresponding author. Email: juntaoye@sjtu.edu.cn (J.Y.); ignacio.funesa@unirioja.es (I.F.A.)

## Table of Contents

|                                                                                           |     |
|-------------------------------------------------------------------------------------------|-----|
| 1. Supplementary Methods.....                                                             | 3   |
| 1.1 General Information.....                                                              | 3   |
| 2. Supplementary Notes.....                                                               | 5   |
| 2.1 Synthesis of Catalysts and Substrates.....                                            | 5   |
| 2.2 Optimization Studies.....                                                             | 12  |
| 2.3 Synthesis and Characterization of Products.....                                       | 15  |
| 2.4 Synthetic Applications.....                                                           | 47  |
| 2.5 Radical Trap Experiment.....                                                          | 51  |
| 2.6 UV-Vis Absorption Spectra of <b>1a</b> , <b>2a</b> , and <b>S5</b> .....              | 52  |
| 2.7 Cyclic Voltammetry Measurements.....                                                  | 54  |
| 2.8 Stern-Volmer Experiments.....                                                         | 56  |
| 2.9 Quantum Yield Measurements.....                                                       | 62  |
| 2.10 X-Ray Crystallographic Data of Compounds <b>3c</b> , <b>4a</b> , and <b>5a</b> ..... | 68  |
| 2.11 Computational Details .....                                                          | 72  |
| 2.12 NMR Spectra and HPLC Spectra.....                                                    | 74  |
| 3. Supplementary References .....                                                         | 210 |

## 1. Supplementary Methods

### 1.1. General Information

Unless otherwise stated all reactions were set up under nitrogen atmosphere utilizing oven-dried glassware. Solvents were either purchased from Adamas or J&K (Sure/Seal bottles) or dried with activated 4 Å molecular sieves and stored in a glovebox under nitrogen atmosphere. Column chromatography was performed using silica gel (200-300 mesh). All other reagents were purchased from various commercial sources and used as received. A blue LED ( $\lambda_{\text{max}} = 441 \text{ nm}$ , 30 W) was used as the light source for all the photo-reactions. Reactions were monitored by thin-layer chromatography on Leyan silica gel plates (60 GF254) which were rendered visible by ultraviolet light and/or spraying with basic  $\text{KMnO}_4$  solution, followed by heating.

$^1\text{H}$  NMR spectra were recorded on a Bruker AVIII 400 (400 MHz) spectrometer and are reported in ppm, relative to tetramethylsilane (TMS,  $\delta$  0 ppm) or residual solvent signals ( $\text{CDCl}_3$  referenced at  $\delta$  7.26 ppm,  $\text{CD}_3\text{OD}$  referenced at  $\delta$  3.31 ppm). Data are reported as follows: (brs = broad singlet, s = singlet, d = doublet, t = triplet, q = quartet, m = multiplet; coupling constant(s) in Hz; integration).  $^{13}\text{C}$  NMR spectra were recorded on a Bruker AVIII 400 (100 MHz) spectrometer and are reported in ppm, relative to residual solvent signals ( $\text{CDCl}_3$  referenced at  $\delta$  77.0 ppm,  $\text{CD}_3\text{OD}$  referenced at  $\delta$  49.0 ppm). Note: due to quadrupole broadening and spin-spin coupling with boron, resonances of hydrogen atoms bonded to the boron atom are weak (sometimes absent due to partial deuteration) and are thus not integrated in  $^1\text{H}$  NMR spectra. In addition, the two carbon atoms attached to the boron atom are not detected in the  $^{13}\text{C}$  NMR spectra for the same reason. High resolution mass spectra (HRMS) were performed at Instrumental Analysis Center of Shanghai Jiao Tong University with electrospray spectrometer Waters Micromass Q-TOF Premier Mass Spectrometer. Enantiomeric ratios (e.r.) were determined by chiral High Performance Liquid Chromatography (HPLC) analysis. UV detection was monitored at 214 nm at the same time. HPLC samples were dissolved in HPLC grade isopropanol (IPA) and hexane unless otherwise stated. HPLC analysis on chiral stationary phase was performed on a Shimadzu LC-2030 Plus-series instrument. Chiralpak AD-H, OD-H, OJ-H, IC-H, or AS-H columns were used with hexane and IPA being the eluents. Gas chromatography-mass spectrometry (GC-MS) analysis were performed on a Shimadzu GCMS-QP2020NX system. Liquid chromatography-mass spectrometry (LC-MS) analysis were performed on a Shimadzu

LCMS 2020 system. Melting points were measured with microscope WRX-4 (Shanghai Yice). Optical rotations were measured on Anton Paar MCP100 automatic polarimeter using a 100 mm path-length cell at 589 nm and reported as follows;  $[\alpha]_D^{25}$  ( $c = \text{g}/100 \text{ mL}$ , solvent).

## 2. Supplementary Notes

### 2.1. Synthesis of Catalysts and Substrates

Note 1: All the thiols used in this study were synthesized from commercially available amino acids/peptides or sugars in 2-4 steps.

Note 2: The cost of D<sub>2</sub>O is 2.72 \$/g from Aldrich and 0.63 \$/g from Bide, a domestic chemical supplier. For comparison, the costs of other commonly used deuterated sources from Aldrich are as follows: CD<sub>3</sub>OD—13.31 \$/g; d<sub>8</sub>-*i*-PrOH—14.93 \$/g; D<sub>2</sub>—149.1 \$/L (from Energy Chemical); NaBD<sub>4</sub>—140.98 \$/g; LiAlD<sub>4</sub>—1000.59 \$/g (prices accessed on June 13, 2022).

The photocatalyst 4CzIPN<sup>1</sup> and 4DPAIPN,<sup>2</sup> **S2**,<sup>3</sup> **S3**,<sup>4,5</sup> **S4-S7**,<sup>6,7</sup> **S9-S14**,<sup>6,7</sup> **S1** and **S8**,<sup>8-10</sup> olefins,<sup>11-15</sup> and *N*-heterocyclic carbene (NHC)-BH<sub>3</sub> complexes<sup>16,17</sup> were synthesized according to the reported procedures.

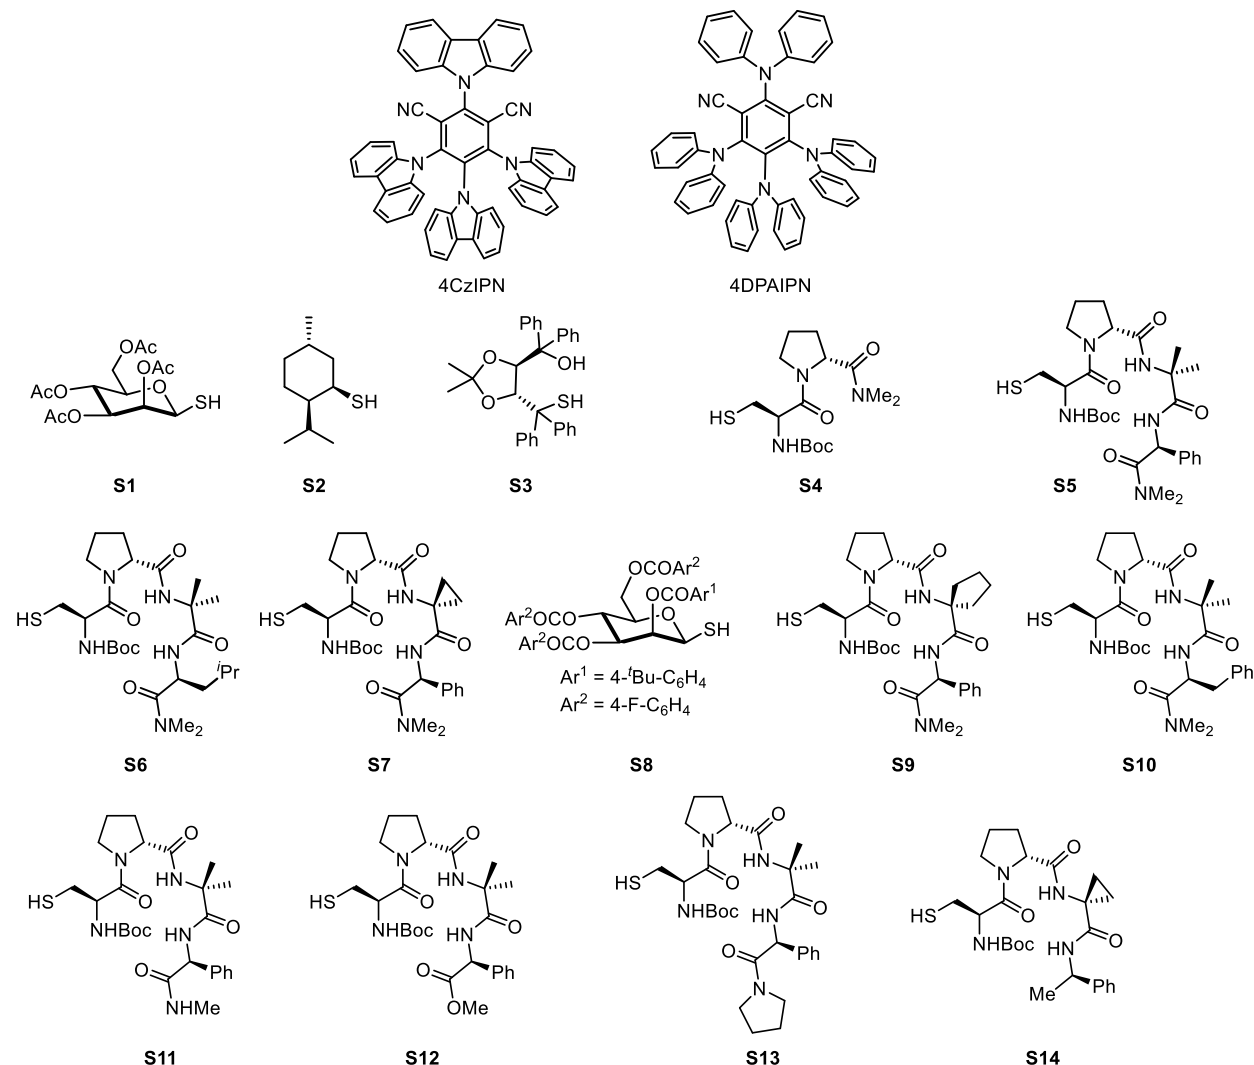

The thiol catalyst **S4-S6** and **S9-S14** were synthesized as follows:<sup>6,7</sup>

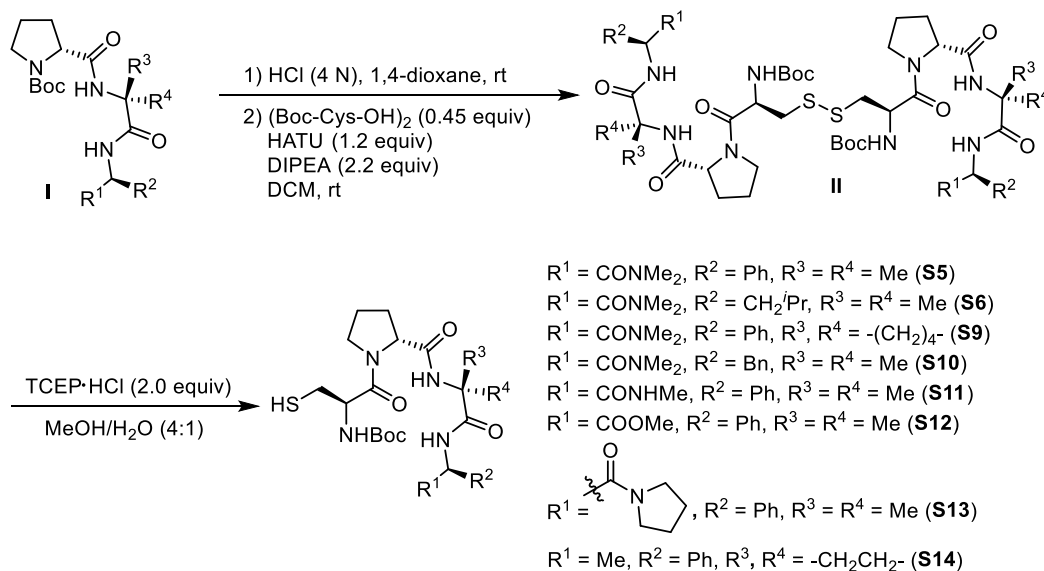

**Typical procedure for the synthesis of S9:** In a 250 mL round-bottomed flask equipped with a stir bar, **I**<sup>6</sup> (4.26 g, 8.7 mmol) was treated with HCl (4 N in 1,4-dioxane, 22.5 mL) and the reaction mixture was stirred at room temperature for 1 h. The excess HCl was removed under a stream of nitrogen atmosphere and the reaction mixture was concentrated in vacuo to give a foamy white solid. The residue was dissolved in CH<sub>2</sub>Cl<sub>2</sub> (40 mL) and <sup>i</sup>Pr<sub>2</sub>NEt (3.23 mL, 19 mmol) was added. (Boc-Cys-OH)<sub>2</sub> (1.84 g, 4.18 mmol) was added, followed by O-(7-Azabenzotriazol-1-yl)-N,N,N',N'-tetramethyluronium hexafluorophosphate (HATU) (3.99 g, 10.4 mmol), and the reaction mixture was stirred at room temperature for 12 h. The reaction mixture was transferred to a separatory funnel, diluted with EtOAc (200 mL), and washed with aqueous citric acid (2 × 200 mL), saturated aqueous NaHCO<sub>3</sub> (1 × 200 mL) and brine (1 × 200 mL). The organic phases were then dried over Na<sub>2</sub>SO<sub>4</sub>, filtered, and concentrated in vacuo to afford the crude product **II**, which was used for the next step without further purification.

In a 100 mL round-bottomed flask equipped with a stir bar, **II** and tris(2-carboxyethyl)phosphine hydrochloride (TCEP·HCl, 1.8 g, 6.2 mmol) were added and then dissolved in MeOH/H<sub>2</sub>O (40 mL, v/v = 4/1). The reaction mixture was stirred at room temperature for 2 h, then the reaction was quenched with H<sub>2</sub>O, extracted with CH<sub>2</sub>Cl<sub>2</sub> (3 × 20 mL), and dried over Na<sub>2</sub>SO<sub>4</sub>. After evaporation, the residue was purified by flash column chromatography (PE/EA = 1/2) to give **S9** as a foamy white solid (1.53 g, 43% yield over 2 steps): [α]<sub>D</sub><sup>25</sup> = -27.2 (c = 0.36, CHCl<sub>3</sub>); m.p. 174-176 °C; <sup>1</sup>H NMR (400 MHz, CDCl<sub>3</sub>) δ = 7.83

(d,  $J = 8.0$  Hz, 1 H), 7.47-7.36 (m, 2 H), 7.35-7.22 (m, 3 H), 7.16 (d,  $J = 8.8$  Hz, 1 H), 6.94 (brs, 1 H), 5.94 (d,  $J = 8.0$  Hz, 1 H), 4.72-4.46 (m, 1 H), 4.44-4.25 (m, 1 H), 3.80-3.54 (m, 2 H), 3.06-2.85 (m, 7 H), 2.76-2.63 (m, 1 H), 2.53-2.40 (m, 1 H), 2.33-1.51 (m, 12 H), 1.42 (s, 9 H);  $^{13}\text{C}$  NMR (100 MHz,  $\text{CDCl}_3$ )  $\delta = 172.7, 170.8, 170.1, 169.7, 155.6, 137.5, 128.6, 127.8, 127.7, 79.6, 66.9, 66.7, 55.0, 53.4, 47.3, 39.6, 37.0, 36.1, 35.3, 28.2, 27.8, 25.9, 25.2, 24.7, 24.3$ ; HRMS (ESI) calcd for  $\text{C}_{29}\text{H}_{44}\text{N}_5\text{O}_6\text{S}$  [ $\text{M}+\text{H}^+$ ]: 590.3007, found: 590.3014.

**S4-S6** and **S10-S14** were prepared similarly according to the above procedures.

**S4**, (*R*)-*tert*-butyl-2-(dimethylcarbamoyl)pyrrolidine-1-carboxylate was used instead of **I** following the above procedure. Colorless oil:  $[\alpha]_{\text{D}}^{25} = 16.3$  ( $c = 0.25$ ,  $\text{CHCl}_3$ );  $^1\text{H}$  NMR (400 MHz,  $\text{CDCl}_3$ )  $\delta = 5.55$  (d,  $J = 8.0$  Hz, 0.74 H), 5.38 (d,  $J = 9.6$  Hz, 0.16 H), 5.11-5.00 (m, 0.14 H), 4.88-4.78 (m, 0.85 H), 4.70-4.55 (m, 0.74 H), 4.18-4.07 (m, 0.21 H), 3.88-3.57 (m, 2 H), 3.18-3.08 (m, 3 H), 3.04-2.95 (m, 3 H), 2.94-2.84 (m, 0.84 H), 2.84-2.65 (m, 1.20 H), 2.27-2.11 (m, 1.70 H), 2.04-1.87 (m, 2.30 H), 1.58 (t,  $J = 8.8$  Hz, 1 H), 1.44 (s, 9 H);  $^{13}\text{C}$  NMR (100 MHz,  $\text{CDCl}_3$ )  $\delta = 171.1, 168.1, 155.0, 79.8, 57.3, 56.7, 54.1, 53.9, 47.3, 46.8, 36.9, 36.1, 35.8, 30.7, 28.5, 28.1, 26.7, 26.5, 24.5, 22.3$ ; HRMS (ESI) calcd for  $\text{C}_{15}\text{H}_{27}\text{N}_3\text{NaO}_4\text{S}$  [ $\text{M}+\text{Na}^+$ ]: 368.1614, found: 368.1617.

**S5**, white solid:  $[\alpha]_{\text{D}}^{25} = 34.6$  ( $c = 0.21$ ,  $\text{CHCl}_3$ ); **m.p.** 178-181 °C;  $^1\text{H}$  NMR (400 MHz,  $\text{CDCl}_3$ )  $\delta = 7.74$  (d,  $J = 8.0$  Hz, 1 H), 7.44-7.23 (m, 5 H), 7.11-6.80 (m, 2 H), 5.90 (d,  $J = 7.6$  Hz, 1 H), 4.63-4.46 (m, 1 H), 4.40-4.28 (m, 1 H), 3.75-3.59 (m, 2 H), 3.03-2.85 (m, 7 H), 2.76-2.65 (m, 1 H), 2.28-1.81 (m, 4 H), 1.64 (t,  $J = 8.8$  Hz, 1 H), 1.55 (s, 3 H), 1.43 (s, 9 H), 1.33 (s, 3 H);  $^{13}\text{C}$  NMR (100 MHz,  $\text{CDCl}_3$ )  $\delta = 173.0, 170.6, 169.9, 169.6, 155.6, 137.3, 128.6, 127.9, 127.6, 79.6, 60.7, 57.0, 55.0, 53.3, 47.3, 36.9, 36.1, 28.2, 27.9, 27.2, 25.8, 25.0, 23.3$ ; HRMS (ESI) calcd for  $\text{C}_{27}\text{H}_{42}\text{N}_5\text{O}_6\text{S}$  [ $\text{M}+\text{H}^+$ ]: 564.2850, found: 564.2847.

**S6**, white solid:  $[\alpha]_{\text{D}}^{25} = -61.4$  ( $c = 0.36$ ,  $\text{CHCl}_3$ ); **m.p.** 187-188 °C;  $^1\text{H}$  NMR (400 MHz,  $\text{CDCl}_3$ )  $\delta = 7.31-7.17$  (m, 2 H), 6.65 (s, 1 H), 5.03-4.91 (m, 1 H), 4.58-4.47 (m, 1 H), 4.29-4.20 (m, 1 H), 3.76-3.58 (m, 2 H), 3.23-2.85 (m, 8 H), 2.74-2.63 (m, 1 H), 2.25-2.03 (m, 3 H), 1.99-1.86 (m, 1 H), 1.69-1.52 (m, 6 H), 1.51-1.36 (m, 12 H), 1.03-0.86 (m, 6 H);  $^{13}\text{C}$  NMR (100 MHz,  $\text{CDCl}_3$ )  $\delta = 173.5, 172.0, 170.9, 169.9, 155.7, 79.5, 61.1, 57.2, 55.0, 47.4, 46.7, 41.6, 37.1, 35.9, 28.3, 28.2, 27.8, 25.6, 25.2, 24.5, 23.6, 23.2, 21.9$ ; HRMS (ESI) calcd for  $\text{C}_{25}\text{H}_{45}\text{N}_5\text{NaO}_6\text{S}$  [ $\text{M}+\text{Na}^+$ ]: 566.2983, found: 566.2988.

**S10**, white solid,  $[\alpha]_D^{25} = -62.4$  ( $c = 0.34$ ,  $\text{CHCl}_3$ ); **m.p.** 158-161 °C;  **$^1\text{H NMR}$**  (400 MHz,  $\text{CDCl}_3$ )  $\delta = 7.55\text{-}7.32$  (m, 2 H), 7.31-7.13 (m, 5 H), 6.55 (brs, 1 H), 5.22-5.04 (m, 1 H), 4.62-4.48 (m, 1 H), 4.32-4.15 (m, 1 H), 3.79-3.55 (m, 2 H), 3.18-2.94 (m, 3 H), 2.92-2.81 (m, 6 H), 2.79-2.68 (m, 1 H), 2.27-2.01 (m, 3 H), 2.00-1.81 (m, 1 H), 1.66 (t,  $J = 8.8$  Hz, 1 H), 1.52 (s, 3 H), 1.44 (s, 9 H), 1.24 (s, 3 H);  **$^{13}\text{C NMR}$**  (100 MHz,  $\text{CDCl}_3$ )  $\delta = 173.2, 171.0, 170.0, 155.7, 136.9, 129.3, 128.1, 126.5, 79.4, 61.1, 57.2, 55.1, 49.4, 47.4, 38.7, 37.0, 35.8, 28.3, 28.2, 27.6, 25.7, 25.3, 23.5$ ; **HRMS** (ESI) calcd for  $\text{C}_{28}\text{H}_{43}\text{N}_5\text{NaO}_6\text{S}$  [ $\text{M}+\text{Na}^+$ ]: 600.2826, found: 600.2820.

**S11**, white solid,  $[\alpha]_D^{25} = -34.7$  ( $c = 0.34$ ,  $\text{CHCl}_3$ ); **m.p.** 183-186 °C;  **$^1\text{H NMR}$**  (400 MHz,  $\text{CDCl}_3$ )  $\delta = 7.64$  (d,  $J = 8.4$  Hz, 1 H), 7.51-7.43 (m, 2 H), 7.40-7.25 (m, 3 H), 6.86-6.61 (m, 2 H), 5.82 (d,  $J = 8.4$  Hz, 1 H), 5.56 (d,  $J = 8.4$  Hz, 1 H), 4.59-4.47 (m, 1 H), 4.25-4.14 (m, 1 H), 3.78-3.64 (m, 2 H), 2.83-2.69 (m, 4 H), 2.64-2.54 (m, 1 H), 2.24-2.03 (m, 3 H), 2.02-1.89 (m, 1 H), 1.58 (s, 3 H), 1.54-1.37 (m, 13 H);  **$^{13}\text{C NMR}$**  (100 MHz,  $\text{CDCl}_3$ )  $\delta = 173.8, 172.4, 170.9, 169.5, 155.1, 137.3, 128.5, 127.9, 127.8, 80.2, 61.0, 57.6, 57.0, 54.1, 47.8, 28.7, 28.2, 27.3, 26.4, 26.1, 25.1, 23.4$ ; **HRMS** (ESI) calcd for  $\text{C}_{26}\text{H}_{39}\text{N}_5\text{NaO}_6\text{S}$  [ $\text{M}+\text{Na}^+$ ]: 572.2513, found: 572.2511.

**S12**, white solid,  $[\alpha]_D^{25} = 37.9$  ( $c = 0.40$ ,  $\text{CHCl}_3$ ); **m.p.** 153-156 °C;  **$^1\text{H NMR}$**  (400 MHz,  $\text{CDCl}_3$ )  $\delta = 7.75$  (d,  $J = 8.0$  Hz, 1 H), 7.52-7.42 (m, 2 H), 7.40-7.20 (m, 3 H), 6.92 (brs, 1 H), 6.12 (d,  $J = 8.4$  Hz, 1 H), 5.66 (d,  $J = 7.6$  Hz, 1 H), 4.63-4.41 (m, 1 H), 4.37-3.27 (m, 1 H), 3.81-3.63 (m, 5 H), 2.91-2.79 (m, 1 H), 2.72-2.61 (m, 1 H), 2.23-2.02 (m, 3 H), 2.00-1.85 (m, 1 H), 1.65-1.53 (m, 4 H), 1.48-1.33 (m, 12 H);  **$^{13}\text{C NMR}$**  (100 MHz,  $\text{CDCl}_3$ )  $\delta = 173.6, 171.6, 171.0, 169.7, 155.3, 136.5, 128.6, 128.1, 127.3, 79.9, 61.0, 57.1, 56.0, 54.7, 52.6, 47.5, 28.4, 28.2, 26.7, 25.8, 25.0, 24.0$ ; **HRMS** (ESI) calcd for  $\text{C}_{26}\text{H}_{38}\text{N}_4\text{NaO}_7\text{S}$  [ $\text{M}+\text{Na}^+$ ]: 573.2353, found: 573.2348.

**S13**, white solid,  $[\alpha]_D^{25} = 3.95$  ( $c = 0.38$ ,  $\text{CHCl}_3$ ); **m.p.** 204-205 °C;  **$^1\text{H NMR}$**  (400 MHz,  $\text{CDCl}_3$ )  $\delta = 7.75$  (d,  $J = 8.0$  Hz, 1 H), 7.47-7.23 (m, 6 H), 7.03 (brs, 1 H), 5.71 (d,  $J = 7.6$  Hz, 1 H), 4.62-4.48 (m, 1 H), 4.41-4.30 (m, 1 H), 3.76-3.51 (m, 4 H), 3.48-3.33 (m, 1 H), 3.21-2.92 (m, 2 H), 2.77-2.62 (m, 1 H), 2.28-2.13 (m, 2 H), 2.08-1.63 (m, 7 H), 1.56 (s, 3 H), 1.43 (s, 9 H), 1.30 (s, 3 H);  **$^{13}\text{C NMR}$**  (100 MHz,  $\text{CDCl}_3$ )  $\delta = 172.9, 170.5, 170.0, 167.9, 155.7, 137.3, 128.6, 127.9, 127.8, 79.5, 60.8, 57.1, 55.1, 54.8, 47.3, 46.3, 46.1, 28.3, 27.9, 27.5, 25.9, 25.8, 25.2, 23.7, 23.2$ ; **HRMS** (ESI) calcd for  $\text{C}_{29}\text{H}_{43}\text{N}_5\text{NaO}_6\text{S}$  [ $\text{M}+\text{Na}^+$ ]: 612.2826, found: 612.2828.

**S14**, white solid,  $[\alpha]_D^{25} = 29.7$  ( $c = 0.36$ ,  $\text{CHCl}_3$ ); **m.p.** 186-187 °C;  **$^1\text{H NMR}$**  (400 MHz,  $\text{CDCl}_3$ )  $\delta = 7.68$  (d,  $J = 8.0$  Hz, 1 H), 7.42-7.34 (m, 3 H), 7.33-7.25 (m, 2 H), 7.22-7.15 (m, 1 H), 5.52-5.38 (m, 1 H), 5.12-4.96 (m, 1 H), 4.47-4.26 (m, 2 H), 4.00-3.86 (m, 1 H), 3.80-3.63 (m, 1



H), 2.91-2.80 (m, 1 H), 2.79-2.67 (m, 1 H), 2.29-2.12 (m, 1 H), 2.08-1.90 (m, 3 H), 1.69-1.60 (m, 2 H), 1.51-1.46 (m, 4 H), 1.43 (s, 9 H), 1.01-0.87 (m, 2 H);  $^{13}\text{C}$  NMR (100 MHz,  $\text{CDCl}_3$ )  $\delta$  = 172.6, 170.70, 170.66, 155.8, 144.4, 128.2, 126.4, 80.7, 61.5, 54.4, 49.1, 47.8, 34.2, 29.2, 28.2, 25.4, 24.7, 22.5, 16.6; **HRMS** (ESI) calcd for  $\text{C}_{25}\text{H}_{37}\text{N}_4\text{O}_5\text{S}$  [ $\text{M}+\text{H}^+$ ]: 505.2479, found: 505.2474.

The thiol catalyst **S8** was synthesized as follows:<sup>8-10</sup>

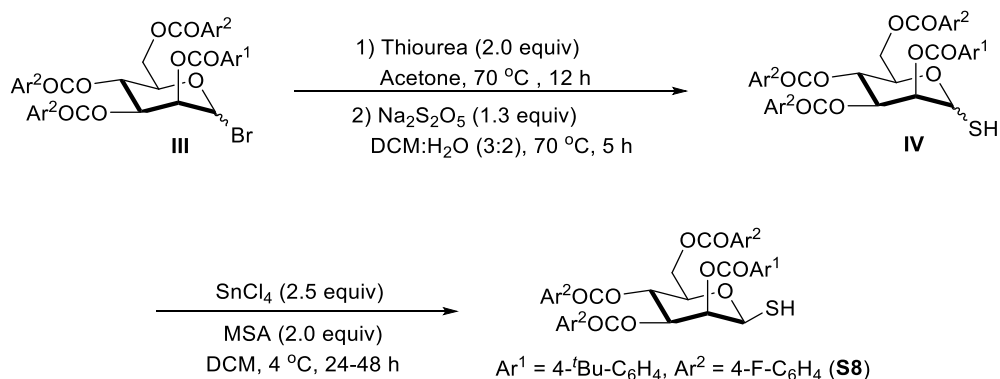

A stirred solution of compound **III**<sup>8</sup> (7.7 g, 10.0 mmol) and thiourea (1.52 g, 20.0 mmol) in acetone (30 mL) was refluxed under  $\text{N}_2$  atmosphere for 12 h. The reaction was cooled to room temperature, after which the solvent was removed under reduced pressure to give the isothiuronium salt as colorless foam. To a suspension of this salt in water (24 mL) and dichloromethane (36 mL) was added  $\text{Na}_2\text{S}_2\text{O}_5$  (2.99 g, 15.73 mmol) and the mixture was stirred under reflux for 5 h until all the solid had dissolved. The reaction was cooled to room temperature, the organic layer was separated and the aqueous layer was extracted with dichloromethane. The combined organic phase was dried and concentrated under reduced pressure. The residue was purified by flash column chromatography to give the  $\alpha,\beta$ -anomers **IV** (5.31 g, 73%) as colorless foam.

The  $\alpha,\beta$ -anomers **IV** (1.0 g) was dissolved in  $\text{CH}_2\text{Cl}_2$  (5 mL) under nitrogen and  $\text{SnCl}_4$  (1.0 M in  $\text{CH}_2\text{Cl}_2$ , 2.5 equiv, 3.5 mL), followed by methane sulfonic acid (1.0 M in  $\text{CH}_2\text{Cl}_2$ , 2.0 equiv, 2.8 mL) was added slowly. The reaction mixture was stirred at 4 °C for 24 h. The reaction was diluted with EtOAc and quenched by addition of 1.0 M  $\text{KHSO}_4$ . The aqueous layer was extracted with EtOAc. The combined organic phase was washed with saturated aqueous  $\text{NaHCO}_3$  and brine, dried over  $\text{Na}_2\text{SO}_4$ , and concentrated under reduced pressure. The residue was purified by flash column chromatography (PE/ $\text{CH}_2\text{Cl}_2$ /Ether = 14/10/1) to give the  $\beta$ -anomer **S8** as colorless foam (0.54 g, 54%); **m.p.** 91-93 °C;  **$^1\text{H NMR}$**  (400 MHz,  $\text{CDCl}_3$ )  $\delta$  = 8.19-8.10 (m, 2 H), 8.03-7.96 (m, 2 H), 7.95-7.88 (m, 2 H), 7.84-7.76 (m, 2 H), 7.47-7.40 (m, 2 H), 7.16-7.08 (m, 2 H), 7.06-6.99 (m, 2 H), 6.98-6.90 (m, 2 H), 6.02-5.92 (m, 1 H), 5.89 (d,  $J$  = 3.2 Hz, 1 H), 5.61 (dd,  $J_1$  = 10.0 Hz,  $J_2$  = 3.2 Hz, 1 H), 5.17 (d,  $J$  = 10.0 Hz, 1 H), 4.74 (dd,  $J_1$  = 12.0 Hz,  $J_2$  = 2.4 Hz, 1 H), 4.45 (dd,  $J_1$  = 12.2 Hz,  $J_2$  = 4.2 Hz, 1 H), 4.21-4.10 (m, 1 H), 2.64 (d,  $J$  = 10.0 Hz, 1 H), 1.38 (s, 9

H); **<sup>13</sup>C NMR** (100 MHz, CDCl<sub>3</sub>) δ = 166.0 (d,  $J_{C-F}$  = 254.0 Hz), 165.9 (d,  $J_{C-F}$  = 253.2 Hz), 165.8 (d,  $J_{C-F}$  = 252.8 Hz), 165.2, 165.0, 164.6, 164.3, 157.7, 132.39 (d,  $J_{C-F}$  = 9.2 Hz), 132.38 (d,  $J_{C-F}$  = 9.5 Hz), 132.33 (d,  $J_{C-F}$  = 9.4 Hz), 129.8, 126.04 (d,  $J$  = 3.0 Hz), 125.99, 125.7, 125.0-124.8 (m), 115.71 (d,  $J$  = 21.9 Hz), 115.63 (d,  $J$  = 21.9 Hz), 115.55 (d,  $J$  = 22.0 Hz), 76.9, 76.6, 73.1, 72.3, 66.1, 62.8, 35.2, 31.0; **<sup>19</sup>F NMR** (376 MHz, CDCl<sub>3</sub>) δ = -104.1, -104.5, -105.1; **HRMS** (ESI) calcd for C<sub>38</sub>H<sub>33</sub>F<sub>3</sub>NaO<sub>9</sub>S [M+Na<sup>+</sup>]: 745.1690, found: 745.1676.

## 2.2. Optimization Studies

Supplementary Table 1. Optimization of deuteroboration<sup>[a]</sup>

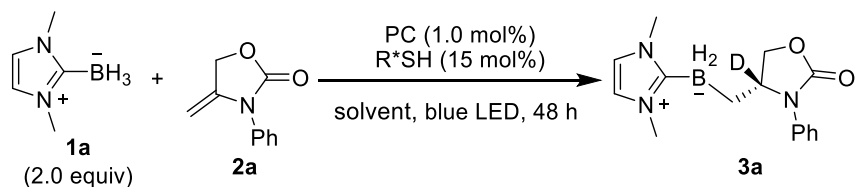

| Entry             | PC      | R*SH       | solvent                        | Yield/% <sup>[b]</sup> | D/% <sup>[c]</sup> | er <sup>[d]</sup> |
|-------------------|---------|------------|--------------------------------|------------------------|--------------------|-------------------|
| 1                 | 4DPAIPN | <b>S1</b>  | toluene:D <sub>2</sub> O (3:1) | 56                     | 96                 | 48:52             |
| 2                 | 4DPAIPN | <b>S2</b>  | toluene:D <sub>2</sub> O (3:1) | 79                     | 90                 | 51:49             |
| 3                 | 4DPAIPN | <b>S3</b>  | toluene:D <sub>2</sub> O (3:1) | 42                     | 90                 | 53:47             |
| 4                 | 4DPAIPN | <b>S4</b>  | toluene:D <sub>2</sub> O (3:1) | 50                     | 95                 | 58:42             |
| 5                 | 4DPAIPN | <b>S5</b>  | toluene:D <sub>2</sub> O (3:1) | 67                     | 94                 | 93:7              |
| 6                 | 4DPAIPN | <b>S6</b>  | toluene:D <sub>2</sub> O (3:1) | 49                     | 96                 | 93:7              |
| 7                 | 4DPAIPN | <b>S7</b>  | toluene:D <sub>2</sub> O (3:1) | 68                     | 94                 | 92:8              |
| 8                 | 4DPAIPN | <b>S10</b> | toluene:D <sub>2</sub> O (3:1) | 78                     | 92                 | 86:14             |
| 9                 | 4DPAIPN | <b>S5</b>  | toluene:D <sub>2</sub> O (1:1) | 43                     | 97                 | 93:7              |
| 10                | 4DPAIPN | <b>S5</b>  | toluene:D <sub>2</sub> O (4:1) | 71                     | 90                 | 93:7              |
| 11                | 4DPAIPN | <b>S5</b>  | toluene                        | 73                     | -                  | 88:12             |
| 12                | 4CzIPN  | <b>S5</b>  | toluene:D <sub>2</sub> O (3:1) | 51                     | 95                 | 93:7              |
| 13 <sup>[e]</sup> | 4DPAIPN | <b>S5</b>  | toluene:D <sub>2</sub> O (3:1) | 73                     | 94                 | 93:7              |
| 14 <sup>[f]</sup> | 4DPAIPN | <b>S5</b>  | toluene:D <sub>2</sub> O (3:1) | N.D.                   | -                  | -                 |
| 15 <sup>[g]</sup> | 4DPAIPN | <b>S5</b>  | toluene:D <sub>2</sub> O (3:1) | N.D.                   | -                  | -                 |
| 16 <sup>[h]</sup> | 4DPAIPN | <b>S5</b>  | toluene:D <sub>2</sub> O (3:1) | N.D.                   | -                  | -                 |

[a] Unless otherwise noted, all reactions were carried with **1a** (0.2 mmol), **2a** (0.1 mmol), PC (1 mol%), R\*SH (15 mol%), toluene (0.75 mL), D<sub>2</sub>O (0.25 mL) under 10 °C for 48 h with irradiation from a 30 W blue LED. The stirring rate for all the reactions is 400 r/min. [b] Isolated yield of **3a**. [c] Determined by <sup>1</sup>H NMR analysis of the isolated product. [d] Determined by chiral HPLC analysis. [e] Reaction time: 72 h. [f] No photocatalyst. [g] Without light irradiation. [h] No thiol catalyst. N.D. = Not detected.

**Supplementary Table 2.** Optimization of deuteriosilylation using olefin **2k**<sup>[a]</sup>

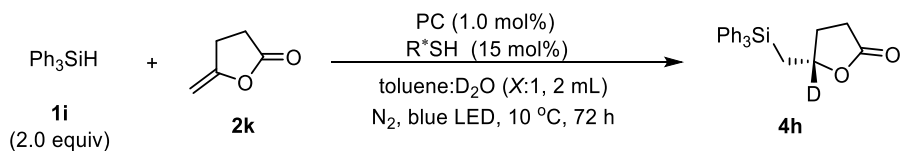

| Entry            | PC      | R*SH       | X | Yield/% <sup>[b]</sup> | D/% <sup>[c]</sup> | er <sup>[d]</sup> |
|------------------|---------|------------|---|------------------------|--------------------|-------------------|
| 1                | 4CzIPN  | <b>S5</b>  | 3 | 80                     | 93                 | 81:19             |
| 2                | 4CzIPN  | <b>S7</b>  | 3 | 79                     | 91                 | 74:26             |
| 3 <sup>[e]</sup> | 4CzIPN  | <b>S7</b>  | 3 | 48                     | 66                 | 80:20             |
| 4                | 4DPAIPN | <b>S5</b>  | 3 | 74                     | 94                 | 82:18             |
| 5                | 4DPAIPN | <b>S5</b>  | 2 | 63                     | 95                 | 83:17             |
| 6                | 4DPAIPN | <b>S5</b>  | 1 | 52                     | 98                 | 82:18             |
| 7                | 4DPAIPN | <b>S8</b>  | 3 | 70                     | 92                 | 38:62             |
| 8                | 4DPAIPN | <b>S9</b>  | 3 | 14                     | 90                 | 78:22             |
| 9                | 4DPAIPN | <b>S10</b> | 3 | 48                     | 91                 | 71:29             |
| 10               | 4DPAIPN | <b>S11</b> | 3 | 67                     | 91                 | 69:31             |
| 11               | 4DPAIPN | <b>S12</b> | 3 | 71                     | 92                 | 66:34             |
| 12               | 4DPAIPN | <b>S13</b> | 3 | 24                     | 90                 | 77:23             |
| 13               | 4DPAIPN | <b>S14</b> | 3 | 52                     | 91                 | 55:45             |

[a] Unless otherwise noted, all reactions were carried with **1i** (0.4 mmol), **2k** (0.2 mmol), PC (1 mol%), R\*SH (15 mol%), toluene:D<sub>2</sub>O (X:1, 2 mL) under 10 °C for 72 h with irradiation from a 30 W blue LED. The stirring rate for all the reactions is 400 r/min. [b] Isolated yield of **4h**. [c] Determined by <sup>1</sup>H NMR analysis of the isolated product. [d] Determined by chiral HPLC analysis. [e] Reaction conducted at 0 °C.

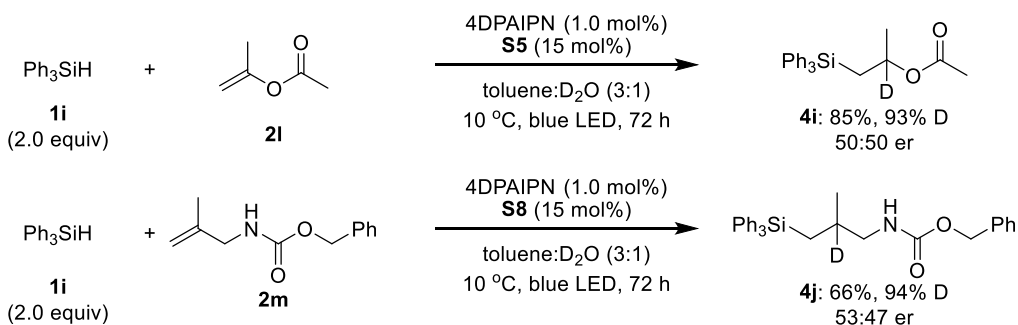

**Supplementary Figure 1.** Preliminary investigations on deuteriosilylation reactions of acyclic 1,1-disubstituted olefins.

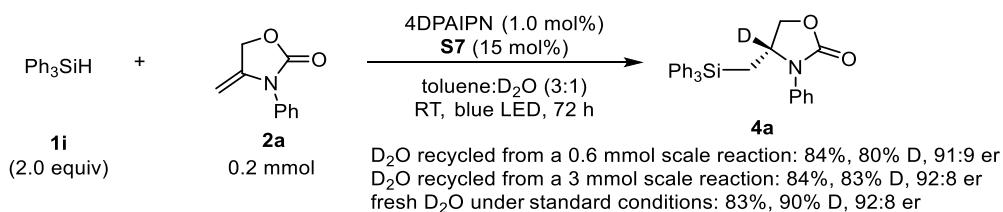

**Supplementary Figure 2.** Investigations on the use of recycled D<sub>2</sub>O.

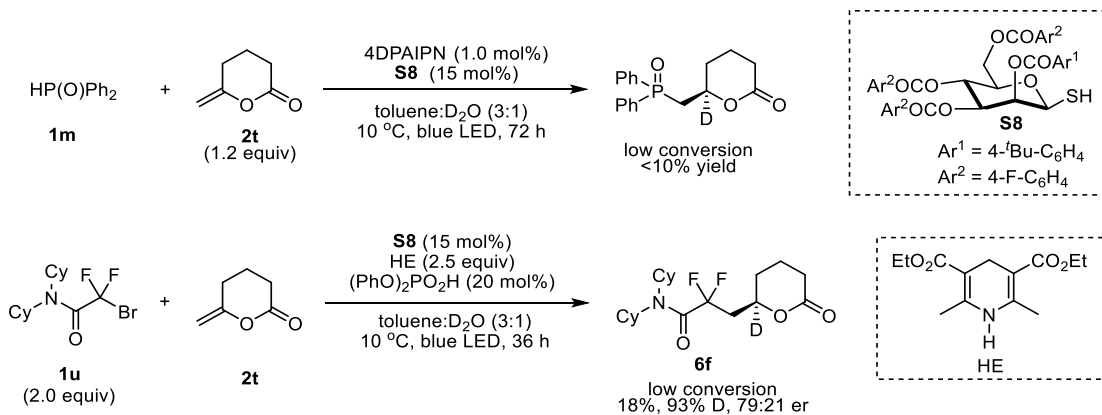

**Supplementary Figure 3.** Preliminary investigations on deutero-phosphinylation and deuterodifluoroalkylation reactions of **2t**.

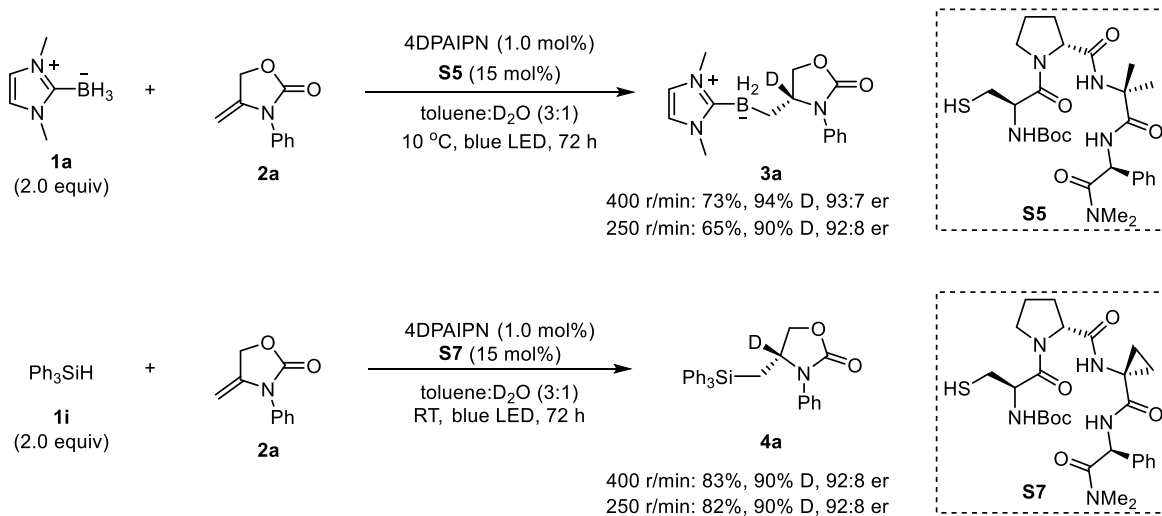

**Supplementary Figure 4.** Investigations on the influence of stirring rate.

## 2.3. Synthesis and Characterization of Products

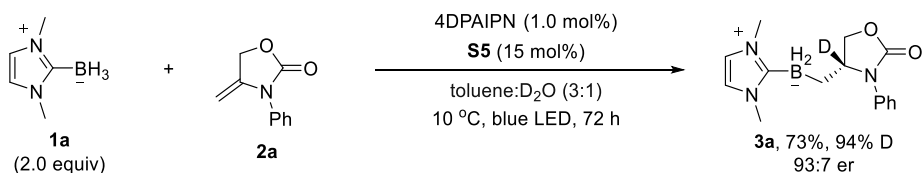

**Typical procedure I:** To an oven-dried 16 × 60 mm vial containing a dry Teflon stir bar were charged with 4DPAIPN (0.8 mg, 0.001 mmol), thiol catalyst **S5** (9.0 mg, 0.015 mmol), and NHC–BH<sub>3</sub> **1a** (22.2 mg, 0.2 mmol). After sequential addition of dry toluene (0.75 mL), D<sub>2</sub>O (0.25 mL), and olefin **2a** (17.5 mg, 0.1 mmol), the reaction mixture was flushed with nitrogen gas for two minutes and then the vial was sealed with a cap and parafilm. The vial was placed in a cooling station and a 30 W blue LED ( $\lambda_{\text{max}} = 441 \text{ nm}$ ) was then placed on the top of the cooling station (**Supplementary Figure 5**), which is connected to a chiller to maintain the temperature of the cooling water at 10 °C. The reaction mixture was stirred at 10 °C under irradiation with a stirring rate of 400 r/min for 72 h. When the reaction is complete as monitored by TLC and GC, CH<sub>2</sub>Cl<sub>2</sub> (10 mL) and H<sub>2</sub>O (5 mL) were added, the organic layer was separated and the aqueous layer was extracted with CH<sub>2</sub>Cl<sub>2</sub> (10 mL × 3). The combined organic layer was washed with brine and dried over anhydrous Na<sub>2</sub>SO<sub>4</sub>. After filtration and evaporation, the residue was purified by preparative thin layer chromatography (eluent: petroleum ether/ethyl acetate = 1/1) to afford **3a** (20.8 mg, 73%, 94% D) as a white solid: 93:7 er (HPLC conditions: Chiralcel OD-H column, hexane/*i*-PrOH = 60/40, 0.5 mL/min,  $\lambda = 214 \text{ nm}$ ,  $t_{\text{R}}$  (major) = 12.9 min,  $t_{\text{R}}$  (minor) = 14.8 min);  $[\alpha]_{\text{D}}^{25} = -66.8$  ( $c = 0.27$ , CHCl<sub>3</sub>); **m.p.** 100–102 °C; **<sup>1</sup>H NMR** (400 MHz, CDCl<sub>3</sub>)  $\delta = 7.47\text{--}7.37$  (m, 2 H), 7.37–7.28 (m, 2 H), 7.14–7.04 (m, 1 H), 6.76 (s, 2 H), 4.56 (d,  $J = 8.4 \text{ Hz}$ , 1 H), 4.50–4.41 (m, 0.06 H), 4.27 (d,  $J = 8.4 \text{ Hz}$ , 1 H), 3.67 (s, 6 H), 0.93 (d,  $J = 10.4 \text{ Hz}$ , 1 H), 0.45 (d,  $J = 12.8 \text{ Hz}$ , 1 H); **<sup>13</sup>C NMR** (100 MHz, CDCl<sub>3</sub>)  $\delta = 156.5, 137.6, 128.6, 124.0, 121.7, 121.6, 120.3, 69.2, 59.1$  ( $J_{\text{C-D}} = 21.9 \text{ Hz}$ ), 35.7; **<sup>11</sup>B NMR** (128 MHz, CDCl<sub>3</sub>)  $\delta = -30.3$  (t,  $J = 67.5 \text{ Hz}$ ). HRMS analysis indicated that the BH<sub>2</sub> moiety of the product was also partially deuterated (see the first entry of the spectrum below).

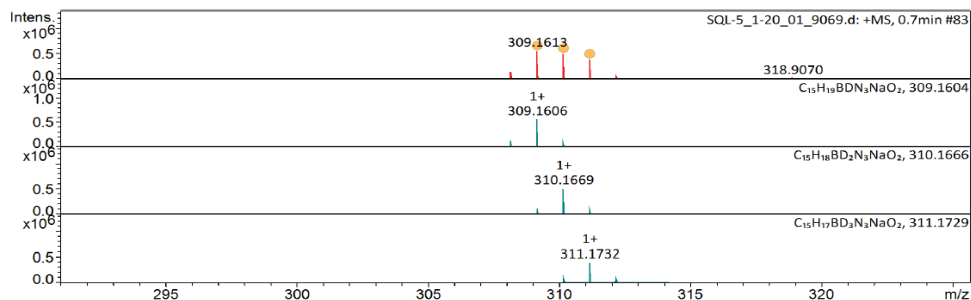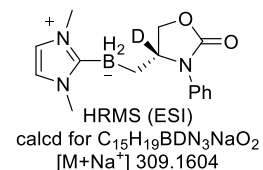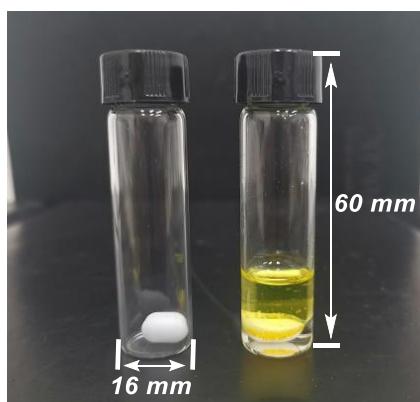

**A**

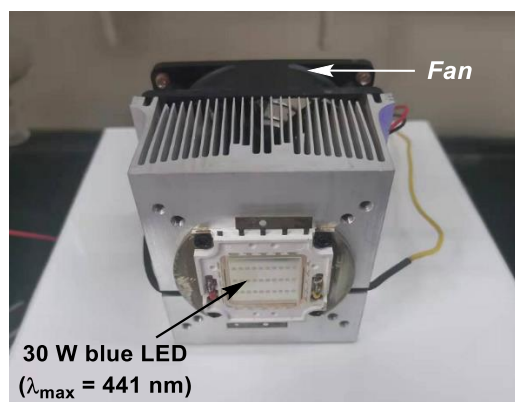

**B**

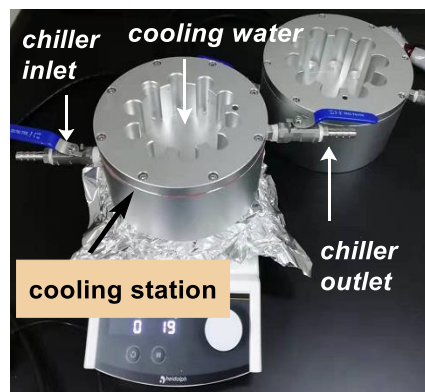

**C**

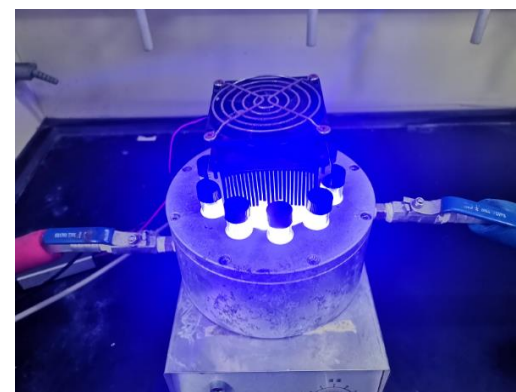

**D**

**Supplementary Figure 5. Reaction setup.** (A) 8-mL vial used for the reaction. (B) 30 W blue LED ( $\lambda_{\max} = 441$  nm) used for the reaction. (C) A custom-made cooling station, connected to a chiller to maintain the reaction temperature at 10 °C. (D) Reaction setup (covered by a cardboard box when the light is on).

The following compounds **3-5** were prepared according to the above **Typical Procedure I** unless otherwise stated. All the racemic samples for HPLC measurement were also prepared according to this procedure but using  $\text{Ph}_3\text{SiSH}$  or  $\text{CySH}$  instead of a chiral thiol catalyst.



### Synthesis of **3b**:

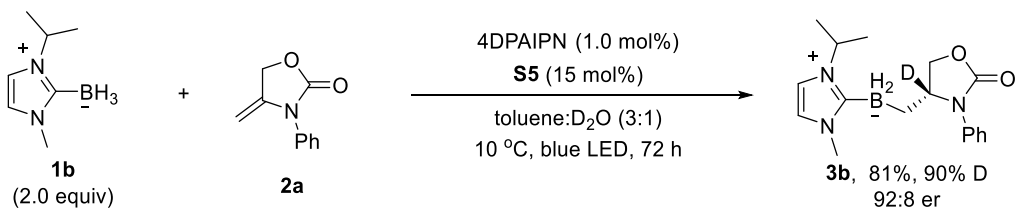

The reaction of 4DPAIPN (1.0 mg, 0.001 mmol), **1b** (27.9 mg, 0.2 mmol), **2a** (17.4 mg, 0.1 mmol), **S5** (8.6 mg, 0.015 mmol), toluene (0.75 mL) and D<sub>2</sub>O (0.25 mL) afforded **3b** (25.5 mg, 81%, 90% D) (eluent: petroleum ether/ethyl acetate = 1/1) as a white solid: 92:8 er (HPLC conditions: Chiralcel OD-H column, hexane/*i*-PrOH = 60/40, 0.5 mL/min,  $\lambda = 214$  nm,  $t_R$  (major) = 10.4 min,  $t_R$  (minor) = 11.4 min);  $[\alpha]_D^{25} = -72.8$  ( $c = 0.17$ , CHCl<sub>3</sub>); **m.p.** 64-65 °C; **<sup>1</sup>H NMR** (400 MHz, CDCl<sub>3</sub>)  $\delta = 7.49$ -7.39 (m, 2 H), 7.38-7.28 (m, 2 H), 7.14-7.04 (m, 1 H), 6.91-6.85 (m, 1 H), 6.83-6.76 (m, 1 H), 5.06-4.89 (m, 1 H), 4.57 (d,  $J = 8.4$  Hz, 1 H), 4.47-4.34 (m, 0.1 H), 4.25 (d,  $J = 8.4$  Hz, 1 H), 3.68 (s, 3 H), 1.43-1.29 (m, 6 H), 0.94 (d,  $J = 12.8$  Hz, 1 H), 0.38 (d,  $J = 12.8$  Hz, 1 H); **<sup>13</sup>C NMR** (100 MHz, CDCl<sub>3</sub>)  $\delta = 156.5$ , 137.7, 128.6, 124.0, 121.8, 120.8, 114.9, 69.4, 59.4 (t,  $J_{C-D} = 21.8$  Hz), 49.5, 35.4, 23.1, 23.0; **<sup>11</sup>B NMR** (128 MHz, CDCl<sub>3</sub>)  $\delta = -30.6$  (m). HRMS analysis indicated that the BH<sub>2</sub> moiety of the product was also partially deuterated (see the first entry of the spectrum below).

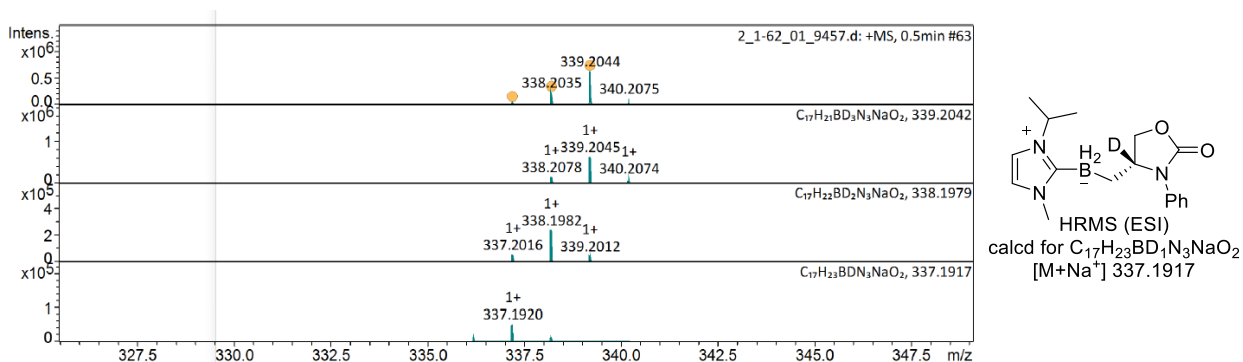

### Synthesis of **3c**:

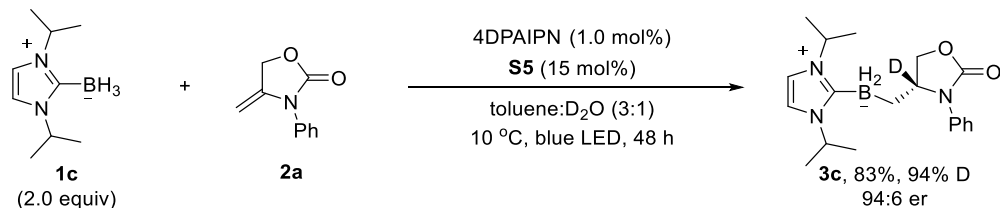

The reaction of 4DPAIPN (1.0 mg, 0.001 mmol), **1c** (33.4 mg, 0.2 mmol), **2a** (17.4 mg, 0.1

mmol), **S5** (9.3 mg, 0.015 mmol), toluene (0.75 mL) and D<sub>2</sub>O (0.25 mL) afforded **3c** (28.4 mg, 83%, 94% D) (eluent: petroleum ether/ethyl acetate = 1/1) as a white solid: 94:6 er (HPLC conditions: Chiralcel OD-H column, hexane/*i*-PrOH = 75/25, 0.5 mL/min,  $\lambda$  = 214 nm,  $t_R$  (major) = 11.7 min,  $t_R$  (minor) = 13.1 min);  $[\alpha]_D^{25}$  = -74.4 ( $c$  = 0.16, CHCl<sub>3</sub>); **m.p.** 147-150 °C; **<sup>1</sup>H NMR** (400 MHz, CDCl<sub>3</sub>)  $\delta$  = 7.51-7.42 (m, 2 H), 7.39-7.28 (m, 2 H), 7.14-7.04 (m, 1 H), 6.91 (s, 2 H), 5.13-4.89 (m, 2 H), 4.58 (d,  $J$  = 8.4 Hz, 1 H), 4.49-4.39 (m, 0.06 H), 4.25 (d,  $J$  = 8.4 Hz, 1 H), 1.40-1.35 (m, 12 H), 0.94 (d,  $J$  = 12.8 Hz, 1 H), 0.36 (d,  $J$  = 12.8 Hz, 1 H); **<sup>13</sup>C NMR** (100 MHz, CDCl<sub>3</sub>)  $\delta$  = 156.5, 137.7, 128.6, 123.9, 121.7, 115.4, 69.4, 59.5 (t,  $J_{C-D}$  = 21.5 Hz), 49.1, 23.13, 23.11; **<sup>11</sup>B NMR** (128 MHz, CDCl<sub>3</sub>)  $\delta$  = -30.0 (t,  $J$  = 63.8 Hz). HRMS analysis indicated that the BH<sub>2</sub> moiety of the product was also partially deuterated (see the first entry of the spectrum below).

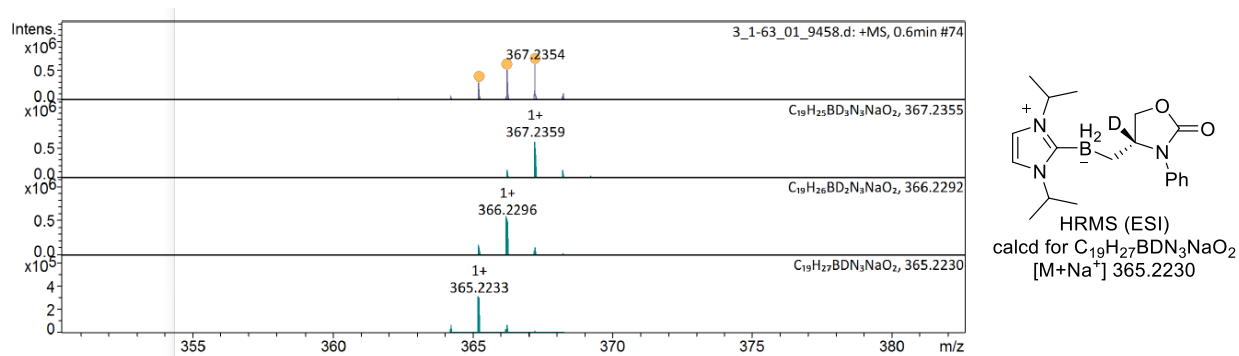

### Synthesis of **3d**:

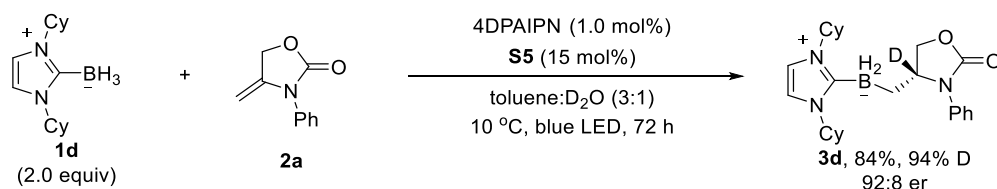

The reaction of 4DPAIPN (1.0 mg, 0.001 mmol), **1d** (49.2 mg, 0.2 mmol), **2a** (17.6 mg, 0.1 mmol), **S5** (9.2 mg, 0.015 mmol), toluene (0.75 mL) and D<sub>2</sub>O (0.25 mL) afforded **3d** (35.6 mg, 84%, 94% D) (eluent: petroleum ether/ethyl acetate = 1/1) as an oil: 92:8 er (HPLC conditions: Chiralcel OD-H column, hexane/*i*-PrOH = 85/15, 0.5 mL/min,  $\lambda$  = 214 nm,  $t_R$  (major) = 16.2 min,  $t_R$  (minor) = 20.3 min);  $[\alpha]_D^{25}$  = -61.2 ( $c$  = 0.10, CHCl<sub>3</sub>); **<sup>1</sup>H NMR** (400 MHz, CDCl<sub>3</sub>)  $\delta$  = 7.52-7.40 (m, 2 H), 7.37-7.28 (m, 2 H), 7.14-7.02 (m, 1 H), 6.88 (s, 2 H), 4.70-4.51 (m, 3 H), 4.44-4.37 (m, 0.06 H), 4.23 (d,  $J$  = 8.4 Hz, 1 H), 2.01-1.68 (m, 10 H), 1.54-1.33 (m, 8 H), 1.32-1.10 (m, 2 H), 0.94 (d,  $J$  = 12.8 Hz, 1 H), 0.32 (d,  $J$  = 12.4 Hz, 1 H); **<sup>13</sup>C NMR** (100 MHz, CDCl<sub>3</sub>)  $\delta$

= 156.5, 137.8, 128.6, 123.9, 121.6, 115.9, 69.6, 56.7, 33.9, 33.8, 25.5, 25.2;  $^{11}\text{B}$  NMR (128 MHz,  $\text{CDCl}_3$ )  $\delta$  = -29.9 (t,  $J$  = 56.6 Hz). HRMS analysis indicated that the  $\text{BH}_2$  moiety of the product was also partially deuterated (see the first entry of the spectrum below).

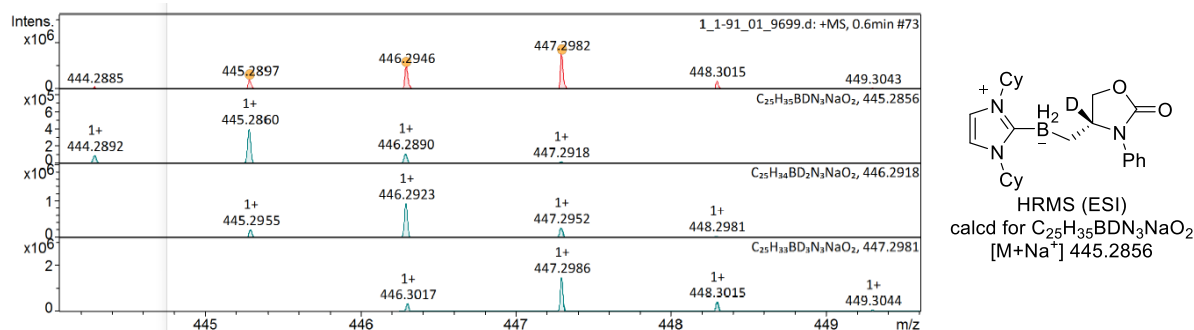

### Synthesis of **3e**:

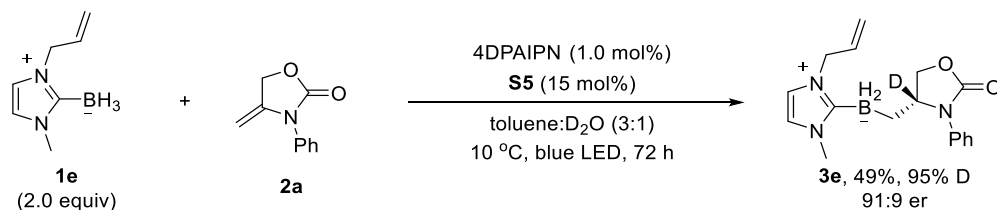

The reaction of 4DPAIPN (0.9 mg, 0.001 mmol), **1e** (27.2 mg, 0.2 mmol), **2a** (17.4 mg, 0.1 mmol), **S5** (8.7 mg, 0.015 mmol), toluene (0.75 mL) and  $\text{D}_2\text{O}$  (0.25 mL) afforded **3e** (15.3 mg, 49%, 95% D) (eluent: petroleum ether/ethyl acetate = 1/1) as an oil: 91:9 er (HPLC conditions: Chiralcel OD-H column, hexane/*i*-PrOH = 80/20, 0.5 mL/min,  $\lambda$  = 214 nm,  $t_R$  (major) = 26.1 min,  $t_R$  (minor) = 33.7 min);  $[\alpha]_D^{25}$  = -78.5 ( $c$  = 0.19,  $\text{CHCl}_3$ );  $^1\text{H}$  NMR (400 MHz,  $\text{CDCl}_3$ )  $\delta$  = 7.47-7.37 (m, 2 H), 7.37-7.28 (m, 2 H), 7.15-7.03 (m, 1 H), 6.80 (s, 2 H), 5.95-5.73 (m, 1 H), 5.25 (d,  $J$  = 10.4 Hz, 1 H), 5.15 (d,  $J$  = 16.8 Hz, 1 H), 4.69 (d,  $J$  = 6.0 Hz, 2 H), 4.56 (d,  $J$  = 8.4 Hz, 1 H), 4.46-4.41 (m, 0.05 H), 4.25 (d,  $J$  = 8.4 Hz, 1 H), 3.69 (s, 3 H), 1.05-0.79 (m, 1 H), 0.48-0.33 (m, 1 H);  $^{13}\text{C}$  NMR (100 MHz,  $\text{CDCl}_3$ )  $\delta$  = 156.5, 137.7, 132.4, 128.6, 123.9, 121.7, 120.6, 119.1, 118.9, 69.3, 50.8, 35.7;  $^{11}\text{B}$  NMR (128 MHz,  $\text{CDCl}_3$ )  $\delta$  = -30.2 (t,  $J$  = 70.2 Hz). HRMS analysis indicated that the  $\text{BH}_2$  moiety of the product was also partially deuterated (see the first entry of the spectrum below).

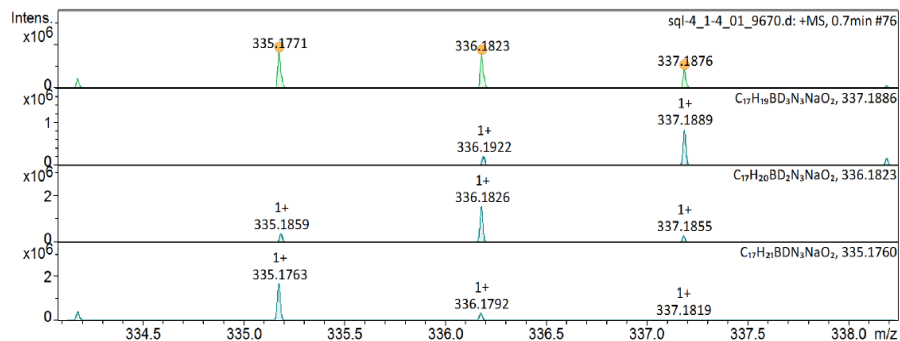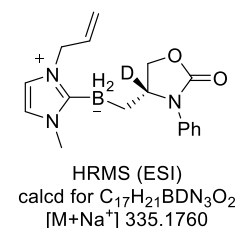

### Synthesis of **3f**:

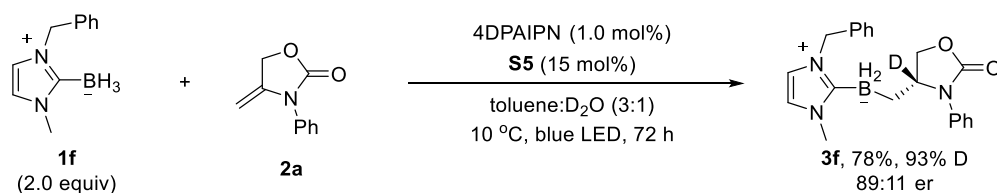

The reaction of 4DPAIPN (1.0 mg, 0.001 mmol), **1f** (37.1 mg, 0.2 mmol), **2a** (17.5 mg, 0.1 mmol), **S5** (8.9 mg, 0.015 mmol), toluene (0.75 mL) and D<sub>2</sub>O (0.25 mL) afforded **3f** (27.0 mg, 78%, 93% D) (eluent: petroleum ether/ethyl acetate = 1/1) as an oil: 89:11 er (HPLC conditions: Chiralcel OD-H column, hexane/*i*-PrOH = 60/40, 1.0 mL/min,  $\lambda$  = 214 nm,  $t_R$  (major) = 8.0 min,  $t_R$  (minor) = 10.0 min);  $[\alpha]_D^{25}$  = -58.0 ( $c$  = 0.16, CHCl<sub>3</sub>); <sup>1</sup>H NMR (400 MHz, CDCl<sub>3</sub>)  $\delta$  = 7.48-7.27 (m, 7 H), 7.21-7.03 (m, 3 H), 6.78 (d,  $J$  = 2.0 Hz, 1 H), 6.70 (d,  $J$  = 1.6 Hz, 1 H), 5.37-5.16 (m, 2 H), 4.54 (d,  $J$  = 8.4 Hz, 1 H), 4.46-4.36 (m, 0.07 H), 4.31-4.17 (m, 1 H), 3.70 (s, 3 H), 0.93 (d,  $J$  = 12.0 Hz, 1 H), 0.42 (d,  $J$  = 12.0 Hz, 1 H); <sup>13</sup>C NMR (100 MHz, CDCl<sub>3</sub>)  $\delta$  = 156.5, 137.7, 135.6, 128.9, 128.6, 128.3, 127.8, 123.9, 121.7, 120.8, 119.1, 69.3, 59.3 (t,  $J_{C-D}$  = 23.5 Hz), 51.9, 35.7; <sup>11</sup>B NMR (128 MHz, CDCl<sub>3</sub>)  $\delta$  = -30.1 (t,  $J$  = 68.4 Hz). HRMS analysis indicated that the BH<sub>2</sub> moiety of the product was also partially deuterated (see the first entry of the spectrum below).

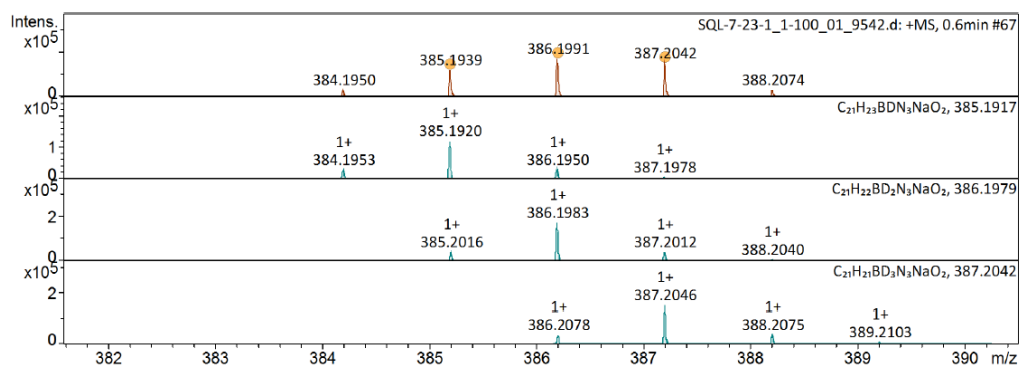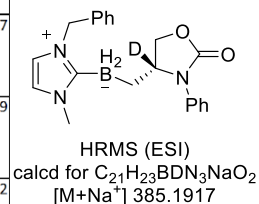

### Synthesis of **3g**:

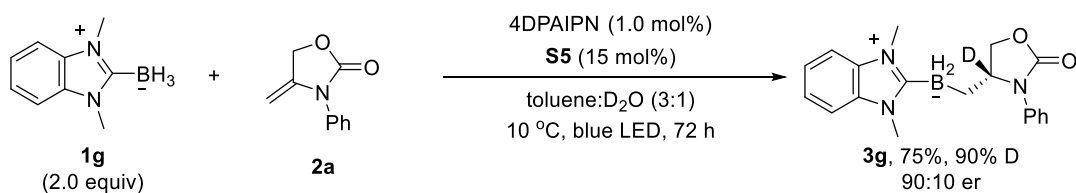

The reaction of 4DPAIPN (1.0 mg, 0.001 mmol), **1g** (32.5 mg, 0.2 mmol), **2a** (17.4 mg, 0.1 mmol), **S5** (8.5 mg, 0.015 mmol), toluene (0.75 mL) and D<sub>2</sub>O (0.25 mL) afforded **3g** (25.2 mg, 75%, 90% D) (eluent: petroleum ether/ethyl acetate = 1/1) as a white solid: 90:10 er (HPLC conditions: Chiralcel OD-H column, hexane/*i*-PrOH = 70/30, 0.5 mL/min,  $\lambda$  = 214 nm,  $t_R$  (major) = 18.6 min,  $t_R$  (minor) = 20.8 min);  $[\alpha]_D^{25}$  = -79.6 ( $c$  = 0.11, CHCl<sub>3</sub>); **m.p.** 145-147 °C; <sup>1</sup>H NMR (400 MHz, CDCl<sub>3</sub>)  $\delta$  = 7.45-7.28 (m, 6 H), 7.25-7.17 (m, 2 H), 7.09-6.94 (m, 1 H), 4.70-4.50 (m, 1.10 H), 4.37 (d,  $J$  = 8.4 Hz, 1 H), 3.87 (s, 6 H), 1.07-0.95 (m, 1 H), 0.77-0.59 (m, 1 H); <sup>13</sup>C NMR (100 MHz, CDCl<sub>3</sub>)  $\delta$  = 156.5, 137.5, 133.0, 128.5, 124.2, 123.9, 121.4, 110.7, 68.9, 32.0; <sup>11</sup>B NMR (128 MHz, CDCl<sub>3</sub>)  $\delta$  = -30.3 (t,  $J$  = 84.8 Hz). HRMS analysis indicated that the BH<sub>2</sub> moiety of the product was also partially deuterated (see the first entry of the spectrum below).

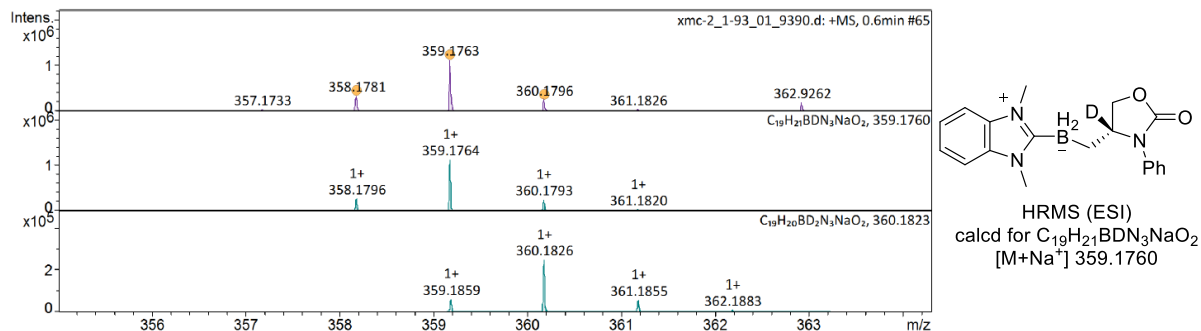

### Synthesis of **3h**:

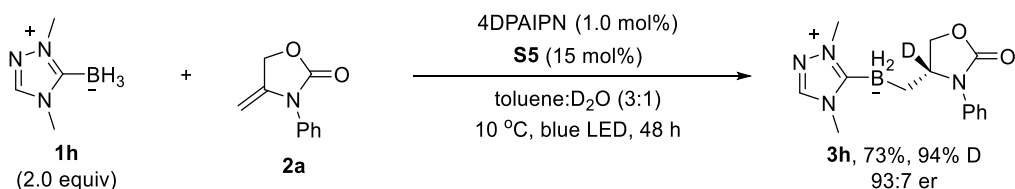

The reaction of 4DPAIPN (1.1 mg, 0.001 mmol), **1h** (22.2 mg, 0.2 mmol), **2a** (17.4 mg, 0.1 mmol), **S5** (8.6 mg, 0.015 mmol), toluene (0.75 mL) and D<sub>2</sub>O (0.25 mL) afforded **3h** (20.9 mg, 73%, 94% D) (eluent: petroleum ether/ethyl acetate = 1/1) as a white solid: 93:7 er (HPLC conditions: Chiralcel OD-H column, hexane/*i*-PrOH = 60/40, 0.5 mL/min,  $\lambda$  = 214 nm,  $t_R$  (major)

= 16.5 min,  $t_R$  (minor) = 18.3 min);  $[\alpha]_D^{25} = -71.8$  ( $c = 0.28$ ,  $\text{CHCl}_3$ ); **m.p.** 72-75 °C;  $^1\text{H NMR}$  (400 MHz,  $\text{CDCl}_3$ )  $\delta = 7.83$  (s, 1 H), 7.43-7.29 (m, 4 H), 7.15-7.05 (m, 1 H), 4.60-4.45 (m, 1.06 H), 4.30 (d,  $J = 8.4$  Hz, 1 H), 3.87 (s, 3 H), 3.66 (s, 3 H), 1.03-0.80 (m, 1 H), 0.70-0.50 (m, 1 H);  $^{13}\text{C NMR}$  (100 MHz,  $\text{CDCl}_3$ )  $\delta = 156.4$ , 141.4, 137.5, 128.7, 124.1, 121.4, 68.8, 58.6 (t,  $J_{\text{C-D}} = 21.6$  Hz), 38.0, 33.5;  $^{11}\text{B NMR}$  (128 MHz,  $\text{CDCl}_3$ )  $\delta = -30.8$  (t,  $J = 84.1$  Hz). HRMS analysis indicated that the  $\text{BH}_2$  moiety of the product was also partially deuterated (see the first entry of the spectrum below).

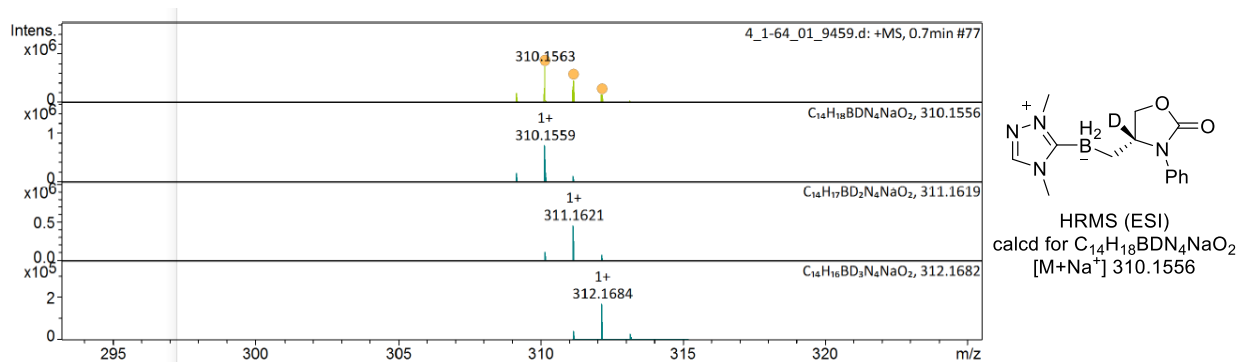

### Synthesis of **3i**:

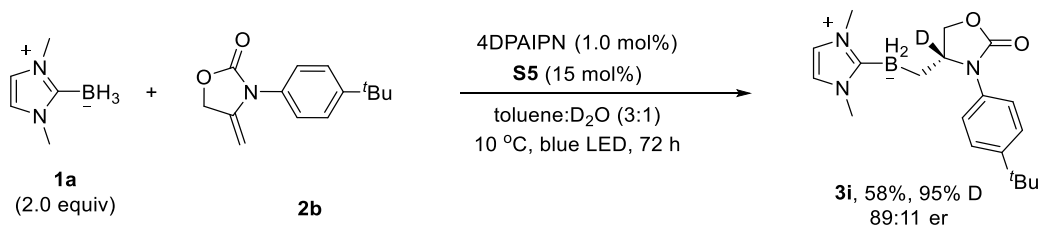

The reaction of 4DPAIPN (1.0 mg, 0.001 mmol), **1a** (22.3 mg, 0.2 mmol), **2b** (23.3 mg, 0.1 mmol), **S5** (8.8 mg, 0.015 mmol), toluene (0.75 mL) and  $\text{D}_2\text{O}$  (0.25 mL) afforded **3i** (20.0 mg, 58%, 95% D) (eluent: petroleum ether/ethyl acetate = 1/1) as a white solid: 89:11 er (HPLC conditions: Chiralcel AD-H column, hexane/*i*-PrOH = 85/15, 1.0 mL/min,  $\lambda = 214$  nm,  $t_R$  (minor) = 14.1 min,  $t_R$  (major) = 15.2 min);  $[\alpha]_D^{25} = -61.4$  ( $c = 0.36$ ,  $\text{CHCl}_3$ ); **m.p.** 114-117 °C;  $^1\text{H NMR}$  (400 MHz,  $\text{CDCl}_3$ )  $\delta = 7.38$ -7.28 (m, 4 H), 6.76 (s, 2 H), 4.55 (d,  $J = 8.4$  Hz, 1 H), 4.47-4.37 (m, 0.05 H), 4.24 (d,  $J = 8.4$  Hz, 1 H), 3.67 (s, 6 H), 1.29 (s, 9 H), 0.94 (d,  $J = 12.4$  Hz, 1 H), 0.45 (d,  $J = 12.8$  Hz, 1 H);  $^{13}\text{C NMR}$  (100 MHz,  $\text{CDCl}_3$ )  $\delta = 156.7$ , 146.9, 134.9, 125.5, 121.4, 120.3, 69.3, 35.7, 34.3, 31.3;  $^{11}\text{B NMR}$  (128 MHz,  $\text{CDCl}_3$ )  $\delta = -30.3$  (t,  $J = 65.9$  Hz). HRMS analysis indicated that the  $\text{BH}_2$  moiety of the product was also partially deuterated (see the first entry of the spectrum below).

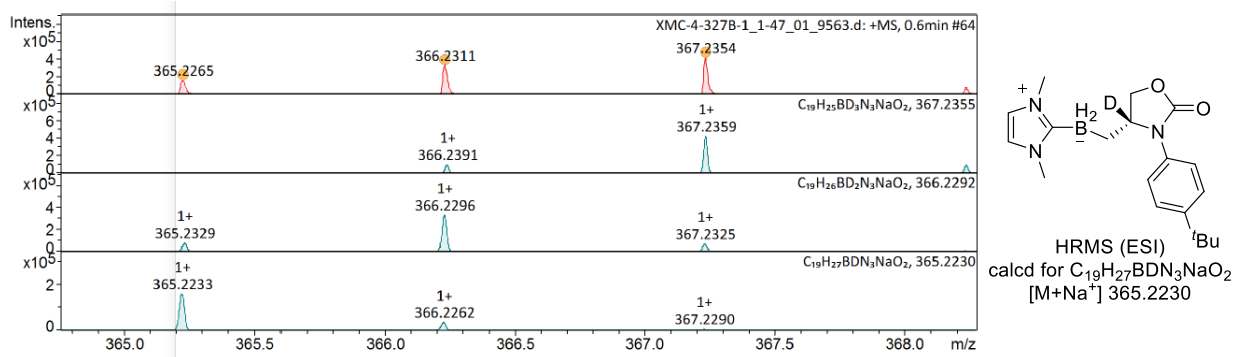

### Synthesis of **3j**:

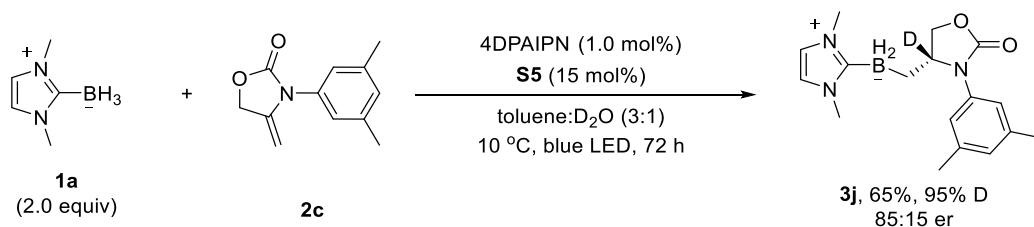

The reaction of 4DPAIPN (1.0 mg, 0.001 mmol), **1a** (22.3 mg, 0.2 mmol), **2c** (20.3 mg, 0.1 mmol), **S5** (8.5 mg, 0.015 mmol), toluene (0.75 mL) and D<sub>2</sub>O (0.25 mL) afforded **3j** (20.4 mg, 65%, 95% D) (eluent: petroleum ether/ethyl acetate = 1/1) as a white solid: 85:15 er (HPLC conditions: Chiralcel OD-H column, hexane/*i*-PrOH = 60/40, 0.5 mL/min,  $\lambda$  = 214 nm,  $t_R$  (major) = 11.1 min,  $t_R$  (minor) = 16.4 min);  $[\alpha]_D^{25}$  = -54.5 ( $c$  = 0.17, CHCl<sub>3</sub>); **m.p.** 104-106 °C; **<sup>1</sup>H NMR** (400 MHz, CDCl<sub>3</sub>)  $\delta$  = 7.00 (s, 2 H), 6.78-6.68 (m, 3 H), 4.54 (d,  $J$  = 8.4 Hz, 1 H), 4.44-4.37 (m, 0.05 H), 4.24 (d,  $J$  = 8.4 Hz, 1 H), 3.68 (s, 6 H), 2.29 (s, 6 H), 0.91 (d,  $J$  = 12.8 Hz, 1 H), 0.44 (d,  $J$  = 12.0 Hz, 1 H); **<sup>13</sup>C NMR** (100 MHz, CDCl<sub>3</sub>)  $\delta$  = 156.6, 138.2, 137.4, 126.0, 120.2, 119.78, 119.77, 69.3, 35.7, 21.4; **<sup>11</sup>B NMR** (128 MHz, CDCl<sub>3</sub>)  $\delta$  = -30.3 (t,  $J$  = 67.4 Hz). HRMS analysis indicated that the BH<sub>2</sub> moiety of the product was also partially deuterated (see the first entry of the spectrum below).

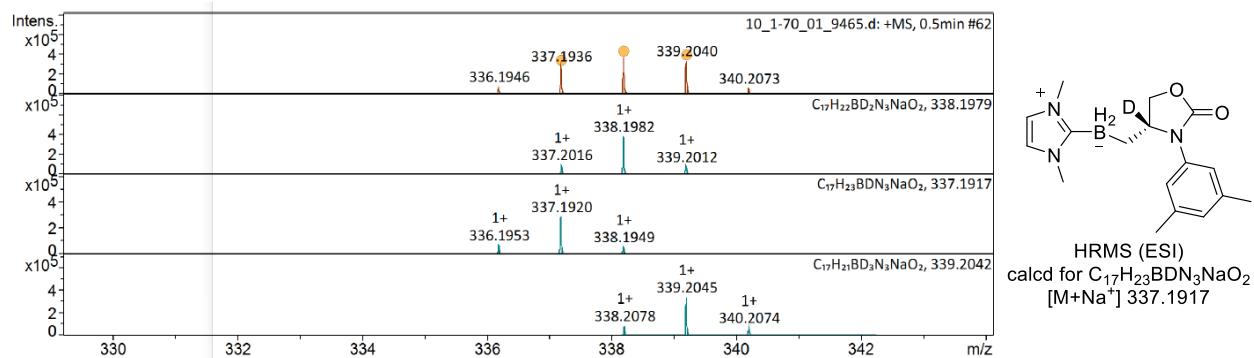

## Synthesis of **3k**:

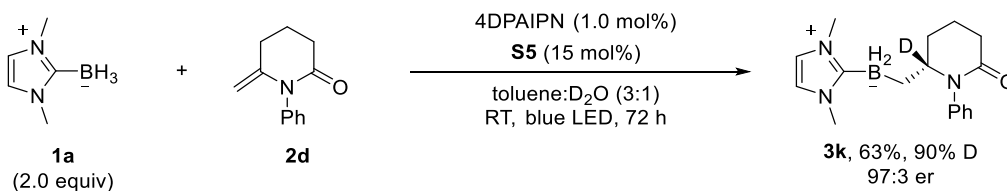

The reaction of 4DPAIPN (0.9 mg, 0.001 mmol), **1a** (22.5 mg, 0.2 mmol), **2d** (18.8 mg, 0.1 mmol), **S5** (8.7 mg, 0.015 mmol), toluene (0.75 mL) and D<sub>2</sub>O (0.25 mL) under room temperature afforded **3k** (18.0 mg, 63%, 90% D) (eluent: CH<sub>2</sub>Cl<sub>2</sub>/MeOH = 20/1) as an oil: 97:3 er (HPLC conditions: Chiralcel AD-H column, hexane/*i*-PrOH = 90/10, 0.5 mL/min,  $\lambda = 214$  nm,  $t_R$  (major) = 102.0 min,  $t_R$  (minor) = 108.8 min);  $[\alpha]_D^{25} = -74.0$  ( $c = 0.05$ , CHCl<sub>3</sub>); **<sup>1</sup>H NMR** (400 MHz, CDCl<sub>3</sub>)  $\delta = 7.37$ - $7.24$  (m, 2 H),  $7.22$ - $7.08$  (m, 3 H),  $6.71$  (s, 2 H),  $3.61$ - $3.48$  (m, 6.10 H),  $2.61$ - $2.38$  (m, 2 H),  $2.16$ - $1.96$  (m, 3 H),  $1.84$ - $1.69$  (m, 1 H),  $0.65$ - $0.36$  (m, 2 H); **<sup>13</sup>C NMR** (100 MHz, CDCl<sub>3</sub>)  $\delta = 170.3$ ,  $142.8$ ,  $128.4$ ,  $128.2$ ,  $126.0$ ,  $120.0$ ,  $63.8$  ( $J_{C-D} = 20.7$  Hz),  $35.6$ ,  $33.0$ ,  $27.9$ ,  $18.1$ ; **<sup>11</sup>B NMR** (128 MHz, CDCl<sub>3</sub>)  $\delta = -29.1$  (t,  $J = 66.9$  Hz). HRMS analysis indicated that the BH<sub>2</sub> moiety of the product was also partially deuterated (see the first entry of the spectrum below).

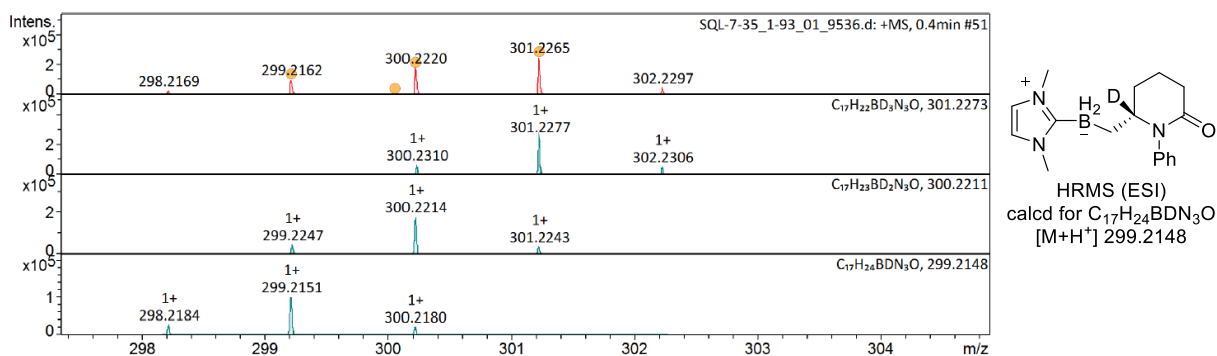



### Synthesis of **3l**:

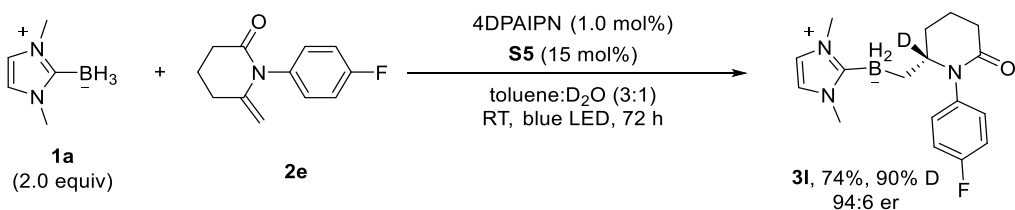

The reaction of 4DPAIPN (1.0 mg, 0.001 mmol), **1a** (22.7 mg, 0.2 mmol), **2e** (20.5 mg, 0.1 mmol), **S5** (8.9 mg, 0.015 mmol), toluene (0.75 mL) and D<sub>2</sub>O (0.25 mL) under room temperature afforded **3l** (23.3 mg, 74%, 90% D) (eluent: CH<sub>2</sub>Cl<sub>2</sub>/MeOH = 20/1) as an oil: 94:6 er (HPLC conditions: Chiralcel OD-H column, hexane/*i*-PrOH = 80/20, 1 mL/min,  $\lambda$  = 214 nm,  $t_R$  (major) = 12.9 min,  $t_R$  (minor) = 14.3 min);  $[\alpha]_D^{25}$  = -46.9 ( $c$  = 0.27, CHCl<sub>3</sub>); <sup>1</sup>H NMR (400 MHz, CDCl<sub>3</sub>)  $\delta$  = 7.16-7.05 (m, 2 H), 7.04-6.94 (m, 2 H), 6.74 (s, 2 H), 3.61-3.53 (m, 6.10 H), 2.58-2.40 (m, 2 H), 2.11-1.93 (m, 3 H), 1.82-1.69 (m, 1 H), 0.59-0.34 (m, 2 H); <sup>13</sup>C NMR (100 MHz, CDCl<sub>3</sub>)  $\delta$  = 170.6, 161.9, 159.5, 138.6, 129.7 (d,  $J_{C-F}$  = 8.3 Hz), 120.1, 115.2 (d,  $J_{C-F}$  = 22.2 Hz), 35.6, 33.0, 28.0, 18.1; <sup>11</sup>B NMR (128 MHz, CDCl<sub>3</sub>)  $\delta$  = -29.2 (t,  $J$  = 66.8 Hz); <sup>19</sup>F NMR (376 MHz, CDCl<sub>3</sub>)  $\delta$  = -116.6. HRMS analysis indicated that the BH<sub>2</sub> moiety of the product was also partially deuterated (see the first entry of the spectrum below).

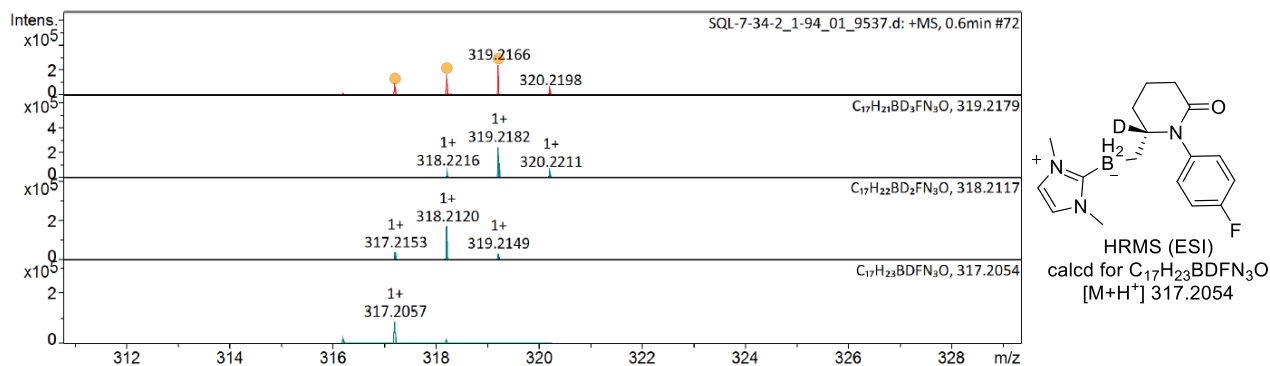

### Synthesis of **3m**:

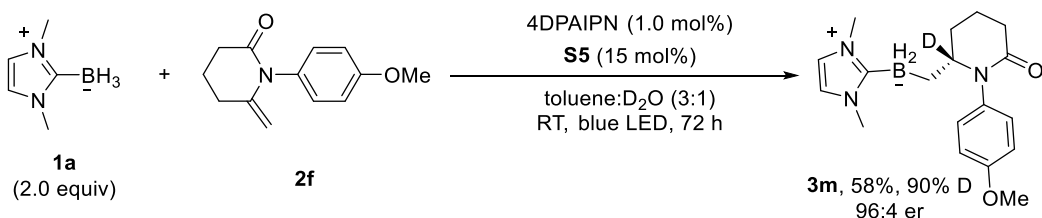

The reaction of 4DPAIPN (0.9 mg, 0.001 mmol), **1a** (22.3 mg, 0.2 mmol), **2f** (21.5 mg, 0.1 mmol), **S5** (8.9 mg, 0.015 mmol), toluene (0.75 mL) and D<sub>2</sub>O (0.25 mL) under room temperature afforded **3m** (19.1 mg, 58%, 90% D) (eluent: CH<sub>2</sub>Cl<sub>2</sub>/MeOH = 20/1) as an oil: 96:4 er (HPLC conditions: Chiralcel OD-H column, hexane/*i*-PrOH = 70/30, 1 mL/min, λ = 214 nm, *t*<sub>R</sub> (major) = 10.7 min, *t*<sub>R</sub> (minor) = 15.6 min); [α]<sub>D</sub><sup>25</sup> = -82.1 (*c* = 0.19, CHCl<sub>3</sub>); <sup>1</sup>H NMR (400 MHz, CDCl<sub>3</sub>) δ = 7.10-6.99 (m, 2 H), 6.91-6.80 (m, 2 H), 6.73 (s, 2 H), 3.79 (s, 3 H), 3.69-3.48 (m, 6.10 H), 2.60-2.40 (m, 2 H), 2.10-1.93 (m, 3 H), 1.81-1.67 (m, 1 H), 0.59 (d, *J* = 12.8 Hz, 1 H), 0.43 (d, *J* = 13.2 Hz, 1 H); <sup>13</sup>C NMR (100 MHz, CDCl<sub>3</sub>) δ = 170.6, 157.5, 135.6, 129.1, 120.0, 113.8, 55.4, 35.6, 33.0, 27.9, 18.1; <sup>11</sup>B NMR (128 MHz, CDCl<sub>3</sub>) δ = -29.1 (t, *J* = 67.6 Hz). HRMS analysis indicated that the BH<sub>2</sub> moiety of the product was also partially deuterated (see the first entry of the spectrum below).

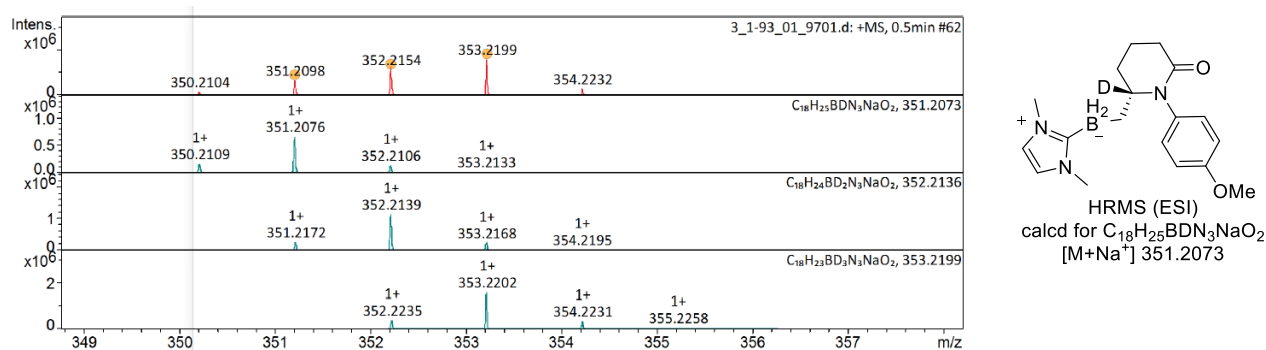

### Synthesis of **3n**:

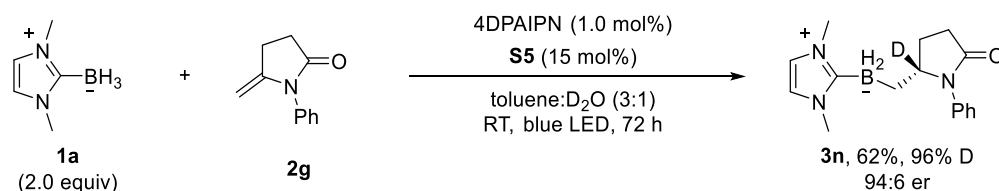

The reaction of 4DPAIPN (0.9 mg, 0.001 mmol), **1a** (22.0 mg, 0.2 mmol), **2g** (17.4 mg, 0.1 mmol), **S5** (8.9 mg, 0.015 mmol), toluene (0.75 mL) and D<sub>2</sub>O (0.25 mL) under room temperature afforded **3n** (17.6 mg, 62%, 96% D) (eluent: PE/EA = 1/1) as a white solid: 94:6 er (HPLC conditions: Chiralcel AD-H column, hexane/*i*-PrOH = 75/25, 0.5 mL/min, λ = 214 nm, *t*<sub>R</sub> (minor) = 19.1 min, *t*<sub>R</sub> (major) = 21.9 min); [α]<sub>D</sub><sup>25</sup> = -49.6 (*c* = 0.14, CHCl<sub>3</sub>); **m.p.** 79-81 °C; <sup>1</sup>H NMR (400 MHz, CDCl<sub>3</sub>) δ = 7.44-7.36 (m, 2 H), 7.35-7.28 (m, 2 H), 7.15-7.05 (m, 1 H), 6.75 (s, 2 H), 4.26-4.17 (m, 0.04 H), 3.66 (s, 6 H), 2.68-2.57 (m, 1 H), 2.54-2.41 (m, 1 H), 2.36-2.25 (m, 1 H), 1.99-1.87 (m, 1 H), 0.81 (d, *J* = 12.4 Hz, 1 H), 0.34 (d, *J* = 12.8 Hz, 1 H); <sup>13</sup>C NMR (100 MHz,

$\text{CDCl}_3$ )  $\delta = 174.8, 138.7, 128.4, 124.5, 123.7, 120.1, 35.7, 32.2, 25.5$ ;  $^{11}\text{B}$  NMR (128 MHz,  $\text{CDCl}_3$ )  $\delta = -29.7$  (t,  $J = 64.3$  Hz). HRMS analysis indicated that the  $\text{BH}_2$  moiety of the product was also partially deuterated (see the first entry of the spectrum below).

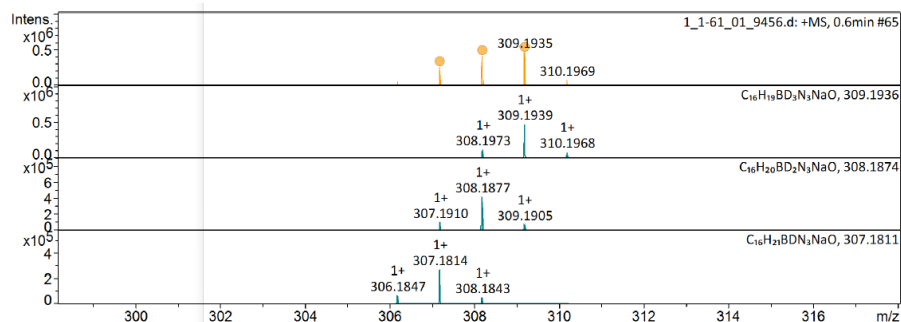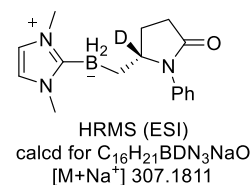

### Synthesis of **3o**:

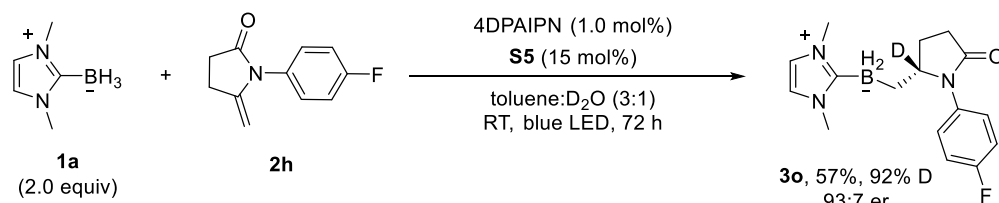

The reaction of 4DPAIPN (1.1 mg, 0.001 mmol), **1a** (22.2 mg, 0.2 mmol), **2h** (19.1 mg, 0.1 mmol), **S5** (8.8 mg, 0.015 mmol), toluene (0.75 mL) and  $\text{D}_2\text{O}$  (0.25 mL) under room temperature afforded **3o** (17.2 mg, 57%, 92% D) (eluent:  $\text{CH}_2\text{Cl}_2/\text{MeOH} = 20/1$ ) as a white solid: 93:7 er (HPLC conditions: Chiralcel AD-H column, hexane/*i*-PrOH = 75/25, 0.5 mL/min,  $\lambda = 214$  nm,  $t_R$  (minor) = 18.4 min,  $t_R$  (major) = 21.3 min);  $[\alpha]_D^{25} = -52.2$  ( $c = 0.07$ ,  $\text{CHCl}_3$ ); **m.p.** 96-100 °C;  $^1\text{H}$  NMR (400 MHz,  $\text{CDCl}_3$ )  $\delta = 7.40\text{-}7.29$  (m, 2 H), 7.08-6.94 (m, 2 H), 6.76 (s, 2 H), 4.22-4.08 (m, 0.08 H), 3.67 (s, 6 H), 2.68-2.54 (m, 1 H), 2.54-2.40 (m, 1 H), 2.37-2.23 (m, 1 H), 1.97-1.84 (m, 1 H), 0.75 (d,  $J = 12.4$  Hz, 1 H), 0.29 (d,  $J = 12.4$  Hz, 1 H);  $^{13}\text{C}$  NMR (100 MHz,  $\text{CDCl}_3$ )  $\delta = 174.8, 160.9, 158.5, 134.7, 125.6$  (d,  $J_{\text{C-F}} = 7.9$  Hz), 120.1, 115.2 (d,  $J_{\text{C-F}} = 22.2$  Hz), 35.7, 32.0, 25.6;  $^{11}\text{B}$  NMR (128 MHz,  $\text{CDCl}_3$ )  $\delta = -29.7$  (t,  $J = 67.2$  Hz);  $^{19}\text{F}$  NMR (376 MHz,  $\text{CDCl}_3$ )  $\delta = -117.9$ . HRMS analysis indicated that the  $\text{BH}_2$  moiety of the product was also partially deuterated (see the first entry of the spectrum below).

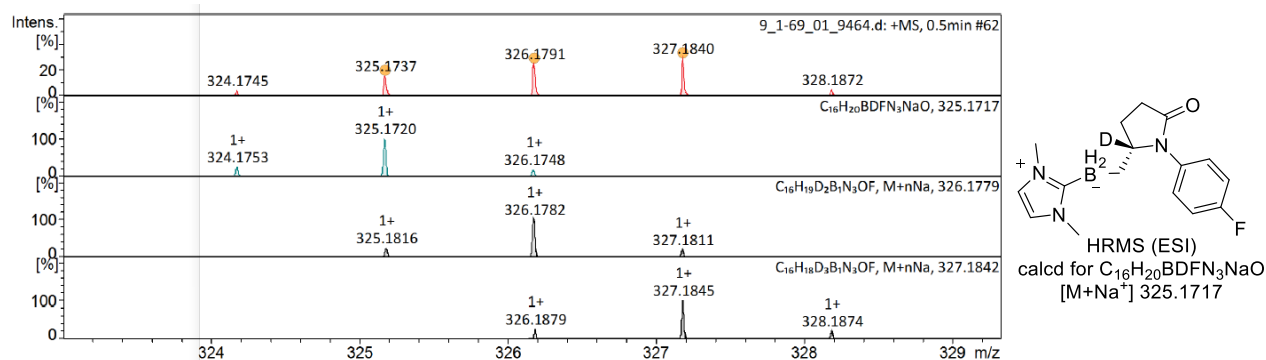

### Synthesis of **3p**:

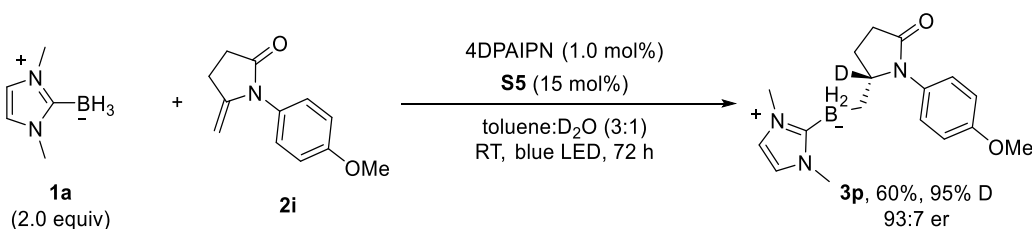

The reaction of 4DPAIPN (0.9 mg, 0.001 mmol), **1a** (22.1 mg, 0.2 mmol), **2i** (20.1 mg, 0.1 mmol), **S5** (8.9 mg, 0.015 mmol), toluene (0.75 mL) and  $D_2O$  (0.25 mL) under room temperature afforded **3p** (18.6 mg, 60%, 95% D) (eluent:  $CH_2Cl_2/MeOH = 20/1$ ) as an oil: 93:7 er (HPLC conditions: Chiralcel AD-H column, hexane/*i*-PrOH = 60/40, 0.5 mL/min,  $\lambda = 214$  nm,  $t_R$  (minor) = 13.0 min,  $t_R$  (major) = 14.8 min);  $[\alpha]_D^{25} = -35.6$  ( $c = 0.16$ ,  $CHCl_3$ );  $^1H$  NMR (400 MHz,  $CDCl_3$ )  $\delta = 7.31$ -7.22 (m, 2 H), 6.92-6.83 (m, 2 H), 6.75 (s, 2 H), 4.19-4.04 (m, 0.05 H), 3.78 (s, 3 H), 3.67 (s, 6 H), 2.68-2.39 (m, 2 H), 2.37-2.24 (m, 1 H), 1.97-1.82 (m, 1 H), 0.76 (d,  $J = 12.4$  Hz, 1 H), 0.28 (d,  $J = 12.8$  Hz, 1 H);  $^{13}C$  NMR (100 MHz,  $CDCl_3$ )  $\delta = 174.7$ , 156.7, 131.7, 125.6, 120.1, 113.8, 55.4, 35.7, 32.0, 25.8;  $^{11}B$  NMR (128 MHz,  $CDCl_3$ )  $\delta = -29.7$  (t,  $J = 64.2$  Hz). HRMS analysis indicated that the  $BH_2$  moiety of the product was also partially deuterated (see the first entry of the spectrum below).

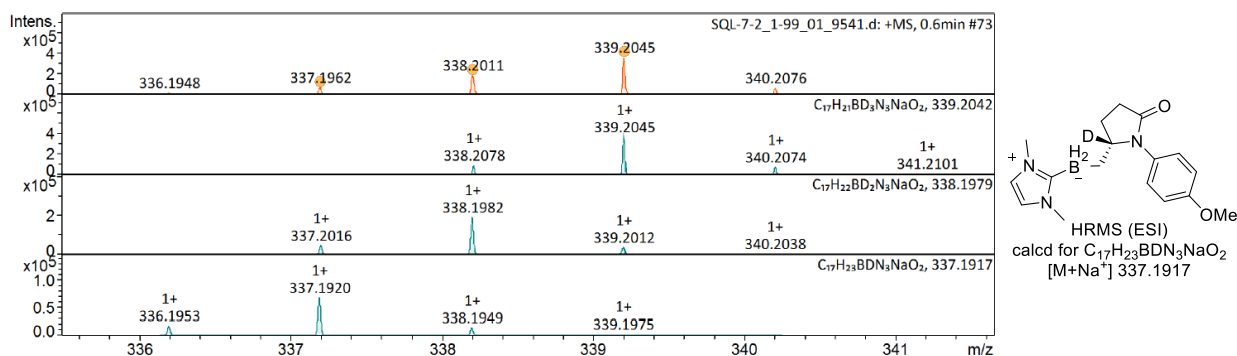

## Synthesis of **4a**:

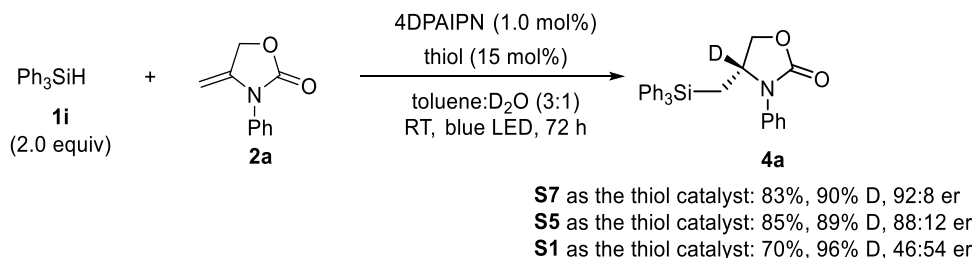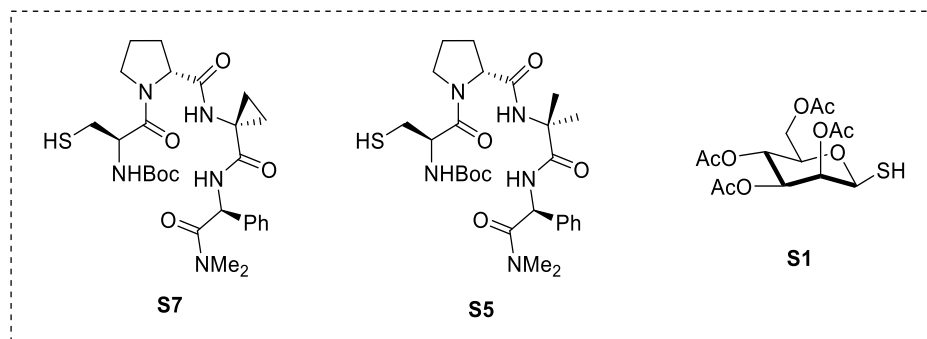

The reaction of 4DPAIPN (1.8 mg, 0.002 mmol), **1i** (107.2 mg, 0.4 mmol), **2a** (35.2 mg, 0.2 mmol), **S7** (17.8 mg, 0.03 mmol), toluene (1.5 mL) and D<sub>2</sub>O (0.5 mL) under room temperature afforded **4a** (72.3 mg, 83%, 90% D) (purified by chromatography on silica gel, eluent: petroleum ether/ethyl acetate = 5/1) as a white solid: 92:8 er (HPLC conditions: Chiralcel AD-H column, hexane/*i*-PrOH = 90/10, 1.0 mL/min,  $\lambda = 214$  nm,  $t_R$  (major) = 7.6 min,  $t_R$  (minor) = 11.5 min);  $[\alpha]_D^{25} = +2.61$  ( $c = 0.15$ , CHCl<sub>3</sub>); **m.p.** 110-111 °C; **<sup>1</sup>H NMR** (400 MHz, CDCl<sub>3</sub>)  $\delta = 7.58$ -7.24 (m, 19 H), 7.22-7.14 (m, 1 H), 4.71-4.51 (m, 0.1 H), 3.95 (d,  $J = 9.2$  Hz, 1 H), 3.62 (d,  $J = 8.8$  Hz, 1 H), 2.05 (d,  $J = 14.8$  Hz, 1 H), 1.61 (d,  $J = 14.8$  Hz, 1 H); **<sup>13</sup>C NMR** (100 MHz, CDCl<sub>3</sub>)  $\delta = 155.4$ , 136.2, 135.4, 133.0, 130.2, 129.2, 128.3, 125.4, 122.7, 68.5, 17.9; **HRMS** (ESI) calcd for C<sub>28</sub>H<sub>24</sub>DNNaO<sub>2</sub>Si [M+Na<sup>+</sup>]: 459.1610, found: 459.1602.

The reaction of 4DPAIPN (0.9 mg, 0.001 mmol), **1i** (52.3 mg, 0.2 mmol), **2a** (17.4 mg, 0.1 mmol), **S5** (8.8 mg, 0.015 mmol), toluene (0.75 mL) and D<sub>2</sub>O (0.25 mL) under room temperature afforded **4a** (37.1 mg, 85%, 89% D) (purified by chromatography on silica gel, eluent: petroleum ether/ethyl acetate = 5/1) as a white solid: 88:12 er (HPLC conditions: Chiralcel AD-H column, hexane/*i*-PrOH = 90/10, 1.0 mL/min,  $\lambda = 214$  nm,  $t_R$  (major) = 7.6 min,  $t_R$  (minor) = 11.5 min); **<sup>1</sup>H NMR** (400 MHz, CDCl<sub>3</sub>)  $\delta = 7.72$ -7.02 (m, 20 H), 4.66-4.50 (m, 0.11 H), 3.96 (d,  $J = 8.8$  Hz, 1 H), 3.63 (d,  $J = 8.8$  Hz, 1 H), 2.05 (d,  $J = 14.8$  Hz, 1 H), 1.61 (d,  $J = 14.8$  Hz, 1 H).

The reaction of 4DPAIPN (0.8 mg, 0.001 mmol), **1i** (52.5 mg, 0.2 mmol), **2a** (17.3 mg, 0.1 mmol), **S1** (6.2 mg, 0.015 mmol), toluene (0.75 mL) and D<sub>2</sub>O (0.25 mL) under room temperature

afforded **4a** (30.5 mg, 70%, 96% D) (purified by chromatography on silica gel, eluent: petroleum ether/ethyl acetate = 5/1) as a white solid: 46:54 er (HPLC conditions: Chiralcel AD-H column, hexane/*i*-PrOH = 90/10, 1.0 mL/min,  $\lambda$  = 214 nm,  $t_R$  (minor) = 7.6 min,  $t_R$  (major) = 11.5 min);  $^1\text{H NMR}$  (400 MHz,  $\text{CDCl}_3$ )  $\delta$  = 7.75-7.09 (m, 20 H), 4.66-4.52 (m, 0.04 H), 3.96 (d,  $J$  = 9.2 Hz, 1 H), 3.63 (d,  $J$  = 9.2 Hz, 1 H), 2.05 (d,  $J$  = 14.8 Hz, 1 H), 1.61 (d,  $J$  = 14.8 Hz, 1 H).

Gram-scale synthesis of **4a** with **S7**:

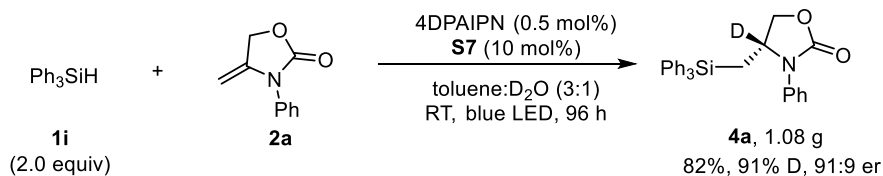

The reaction of 4DPAIPN (12.0 mg, 0.015 mmol), **1i** (1.5261 g, 6.0 mmol), **2a** (525.3 mg, 3.0 mmol), **S7** (168.3 mg, 0.3 mmol), toluene (22.5 mL) and  $\text{D}_2\text{O}$  (7.5 mL) under room temperature afforded **4a** (1.08 g, 82%, 91% D) (purified by chromatography on silica gel, eluent: petroleum ether/ethyl acetate = 5/1) as a white solid: 91:9 er (HPLC conditions: Chiralcel AD-H column, hexane/*i*-PrOH = 90/10, 1.0 mL/min,  $\lambda$  = 214 nm,  $t_R$  (major) = 7.6 min,  $t_R$  (minor) = 11.4 min);  $^1\text{H NMR}$  (400 MHz,  $\text{CDCl}_3$ )  $\delta$  = 7.66-7.06 (m, 20 H), 4.73-4.45 (m, 0.09 H), 3.96 (d,  $J$  = 9.2 Hz, 1 H), 3.62 (d,  $J$  = 8.8 Hz, 1 H), 2.05 (d,  $J$  = 14.4 Hz, 1 H), 1.61 (d,  $J$  = 14.8 Hz, 1 H).

Synthesis of **4a** using recycled  $\text{D}_2\text{O}$ :

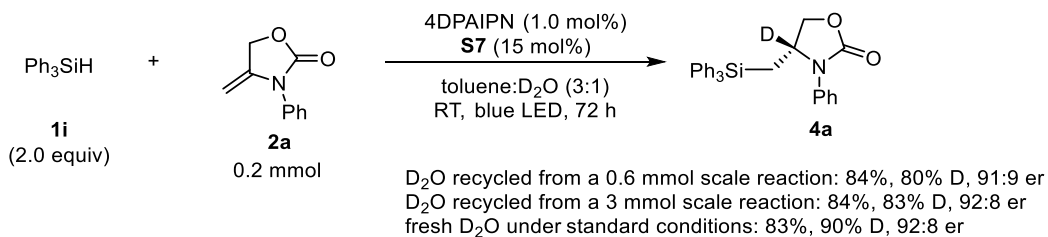

The reaction of 4DPAIPN (1.8 mg, 0.002 mmol), **1i** (104.2 mg, 0.4 mmol), **2a** (35.0 mg, 0.2 mmol), **S7** (16.9 mg, 0.03 mmol), toluene (1.5 mL) and  $\text{D}_2\text{O}$  (0.5 mL, recycled from a 0.6 mmol scale reaction) under room temperature afforded **4a** (73.3 mg, 84%, 80% D) (purified by chromatography on silica gel, eluent: petroleum ether/ethyl acetate = 5/1) as a white solid: 91:9 er (HPLC conditions: Chiralcel AD-H column, hexane/*i*-PrOH = 90/10, 1.0 mL/min,  $\lambda$  = 214 nm,  $t_R$  (major) = 7.6 min,  $t_R$  (minor) = 11.3 min);  $^1\text{H NMR}$  (400 MHz,  $\text{CDCl}_3$ )  $\delta$  = 7.79-7.05 (m, 20

H), 4.68-4.50 (m, 0.20 H), 3.97 (d,  $J = 8.8$  Hz, 1 H), 3.63 (d,  $J = 8.8$  Hz, 1 H), 2.05 (d,  $J = 14.4$  Hz, 1 H), 1.61 (d,  $J = 14.8$  Hz, 1 H).

The reaction of 4DPAIPN (1.7 mg, 0.002 mmol), **1i** (104.1 mg, 0.4 mmol), **2a** (35.0 mg, 0.2 mmol), **S7** (17.0 mg, 0.03 mmol), toluene (1.5 mL) and D<sub>2</sub>O (0.5 mL, recycled from a 3.0 mmol scale reaction) under room temperature afforded **4a** (73.3 mg, 84%, 83% D) (purified by chromatography on silica gel, eluent: petroleum ether/ethyl acetate = 5/1) as a white solid: 92:8 er (HPLC conditions: Chiralcel AD-H column, hexane/*i*-PrOH = 90/10, 1.0 mL/min,  $\lambda = 214$  nm,  $t_R$  (major) = 7.7 min,  $t_R$  (minor) = 11.5 min); <sup>1</sup>H NMR (400 MHz, CDCl<sub>3</sub>)  $\delta = 7.59$ -7.09 (m, 20 H), 4.64-4.54 (m, 0.17 H), 3.96 (d,  $J = 8.8$  Hz, 1 H), 3.63 (d,  $J = 9.2$  Hz, 1 H), 2.05 (d,  $J = 14.8$  Hz, 1 H), 1.61 (d,  $J = 14.8$  Hz, 1 H).

#### Synthesis of **4b**:

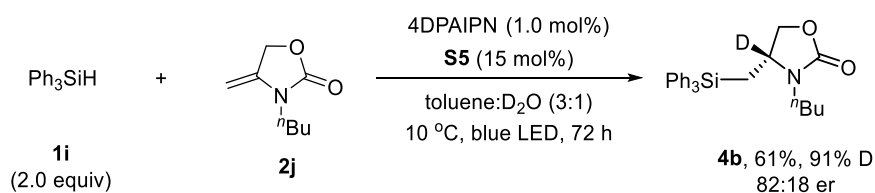

The reaction of 4DPAIPN (1.7 mg, 0.002 mmol), **1i** (106.2 mg, 0.4 mmol), **2j** (29.9 mg, 0.2 mmol), **S5** (17.7 mg, 0.03 mmol), toluene (1.5 mL) and D<sub>2</sub>O (0.5 mL) afforded **4b** (50.8 mg, 61%, 91% D) (purified by chromatography on silica gel, eluent: petroleum ether/ethyl acetate = 5/1) as a white solid: 82:18 er (HPLC conditions: Chiralcel AD-H column, hexane/*i*-PrOH = 96/4, 1.0 mL/min,  $\lambda = 214$  nm,  $t_R$  (minor) = 9.5 min,  $t_R$  (major) = 11.6 min);  $[\alpha]_D^{25} = -17.3$  ( $c = 0.41$ , CHCl<sub>3</sub>); **m.p.** 83-84 °C; <sup>1</sup>H NMR (400 MHz, CDCl<sub>3</sub>)  $\delta = 7.61$ -7.49 (m, 6 H), 7.49-7.32 (m, 9 H), 4.04-3.92 (m, 0.09 H), 3.76 (d,  $J = 8.8$  Hz, 1 H), 3.54-3.40 (m, 2 H), 3.19-3.00 (m, 1 H), 2.06 (d,  $J = 14.4$  Hz, 1 H), 1.58-1.22 (m, 5 H), 0.91 (t,  $J = 7.2$  Hz, 3 H); <sup>13</sup>C NMR (100 MHz, CDCl<sub>3</sub>); 157.7, 135.3, 133.2, 130.1, 128.3, 68.7, 52.1 (t,  $J_{C-D} = 21.8$  Hz), 40.7, 29.3, 19.9, 17.3, 13.7; **HRMS** (ESI) calcd for C<sub>26</sub>H<sub>28</sub>DNNaO<sub>2</sub>Si [M+Na<sup>+</sup>]: 439.1923, found: 439.1921.

### Synthesis of **4c**:

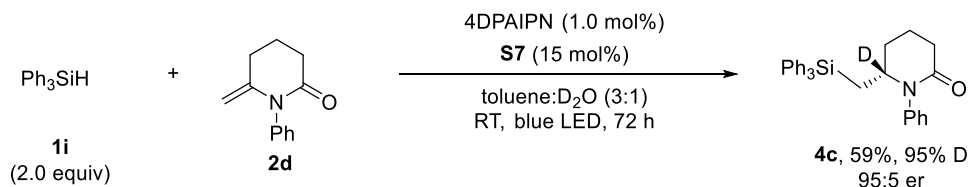

The reaction of 4DPAIPN (0.8 mg, 0.001 mmol), **1i** (52.4 mg, 0.24 mmol), **2d** (18.9 mg, 0.1 mmol), **S7** (8.9 mg, 0.015 mmol), toluene (0.75 mL) and D<sub>2</sub>O (0.25 mL) under room temperature afforded **4c** (26.6 mg, 59%, 95% D) (eluent: petroleum ether/ethyl acetate = 5/1) as an oil: 95:5 er (HPLC conditions: Chiralcel AD-H column, hexane/*i*-PrOH = 80/20, 0.5 mL/min,  $\lambda = 214$  nm,  $t_R$  (major) = 8.9 min,  $t_R$  (minor) = 9.8 min);  $[\alpha]_D^{25} = -2.4$  ( $c = 0.13$ , CHCl<sub>3</sub>); <sup>1</sup>H NMR (400 MHz, CDCl<sub>3</sub>)  $\delta = 7.52$ - $7.20$  (m, 18 H),  $7.18$ - $7.08$  (m, 2 H),  $4.15$ - $4.00$  (m, 0.05 H),  $2.58$ - $2.47$  (m, 1 H),  $2.46$ - $2.33$  (m, 1 H),  $2.02$ - $1.54$  (m, 5 H),  $1.53$ - $1.41$  (m, 1 H); <sup>13</sup>C NMR (100 MHz, CDCl<sub>3</sub>)  $\delta = 170.0$ ,  $141.4$ ,  $135.4$ ,  $133.9$ ,  $129.7$ ,  $129.3$ ,  $128.4$ ,  $128.0$ ,  $127.1$ ,  $32.5$ ,  $29.1$ ,  $18.1$ ,  $17.5$ ; HRMS (ESI) calcd for C<sub>30</sub>H<sub>28</sub>DNNaOSi [M+Na<sup>+</sup>]: 471.1973, found: 471.1975.

### Synthesis of **4d**:

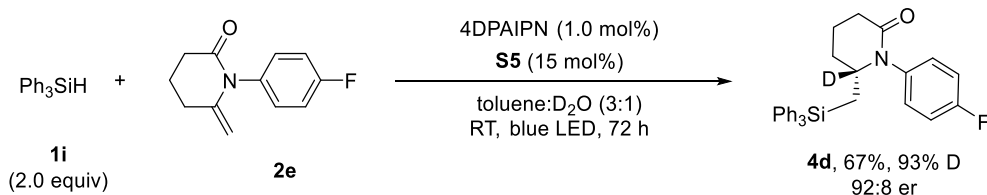

The reaction of 4DPAIPN (1.0 mg, 0.001 mmol), **1i** (52.3 mg, 0.24 mmol), **2e** (20.5 mg, 0.1 mmol), **S5** (9.0 mg, 0.015 mmol), toluene (0.75 mL) and D<sub>2</sub>O (0.25 mL) under room temperature afforded **4d** (31.4 mg, 67%, 93% D) (eluent: petroleum ether/ethyl acetate = 1/1) as an oil: 92:8 er (HPLC conditions: Chiralcel OD-H column, hexane/*i*-PrOH = 80/20, 0.5 mL/min,  $\lambda = 214$  nm,  $t_R$  (major) = 11.8 min,  $t_R$  (minor) = 12.7 min);  $[\alpha]_D^{25} = -10.6$  ( $c = 0.11$ , CHCl<sub>3</sub>); <sup>1</sup>H NMR (400 MHz, CDCl<sub>3</sub>)  $\delta = 7.47$ - $7.26$  (m, 15 H),  $7.13$ - $7.01$  (m, 4 H),  $4.07$ - $3.96$  (m, 0.07 H),  $2.58$ - $2.32$  (m, 2 H),  $1.98$ - $1.73$  (m, 3 H),  $1.73$ - $1.43$  (m, 3 H); <sup>13</sup>C NMR (100 MHz, CDCl<sub>3</sub>)  $\delta = 170.2$ ,  $135.4$ ,  $133.8$ ,  $130.1$ ,  $130.0$ ,  $129.7$ ,  $128.0$ ,  $116.2$ ,  $116.0$ ,  $32.5$ ,  $29.2$ ,  $18.3$ ,  $17.6$ , <sup>19</sup>F NMR (376 MHz, CDCl<sub>3</sub>)  $\delta = -114.9$ ; HRMS (ESI) calcd for C<sub>30</sub>H<sub>27</sub>DFNNaOSi [M+Na<sup>+</sup>]: 489.1879, found: 489.1879.



### Synthesis of **4e**:

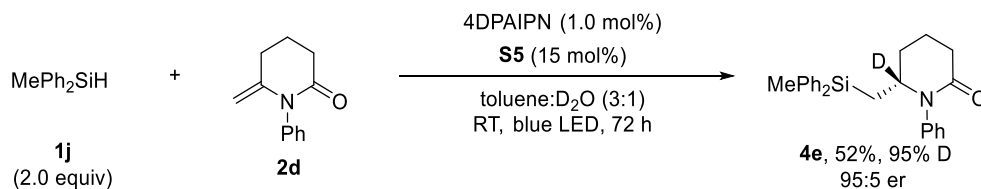

The reaction of 4DPAIPN (0.9 mg, 0.001 mmol), **1j** (40.6 mg, 0.2 mmol), **2d** (18.8 mg, 0.1 mmol), **S5** (8.9 mg, 0.015 mmol), toluene (0.75 mL) and D<sub>2</sub>O (0.25 mL) under room temperature afforded **4e** (20.1 mg, 52%, 95% D) (eluent: petroleum ether/ethyl acetate = 2/1) as a colorless oil: 95:5 er (HPLC conditions: Chiralcel OD-H column, hexane/*i*-PrOH = 90/10, 0.5 mL/min,  $\lambda$  = 214 nm,  $t_R$  (major) = 25.0 min,  $t_R$  (minor) = 30.0 min);  $[\alpha]_D^{25}$  = -16.8 ( $c$  = 0.17, CHCl<sub>3</sub>); **<sup>1</sup>H NMR** (400 MHz, CDCl<sub>3</sub>)  $\delta$  = 7.45-7.19 (m, 13 H), 7.17-7.09 (m, 2 H), 4.04-3.88 (m, 0.05 H), 2.63-2.36 (m, 2 H), 2.00-1.84 (m, 2 H), 1.78-1.47 (m, 3 H), 1.41-1.30 (m, 1 H), 0.50 (s, 3 H); **<sup>13</sup>C NMR** (100 MHz, CDCl<sub>3</sub>)  $\delta$  = 169.9, 141.4, 136.4, 135.5, 134.2, 134.1, 129.44, 129.41, 129.2, 128.3, 127.97, 127.95, 127.1, 32.6, 29.6, 19.7, 17.8, -3.8; **HRMS** (ESI) calcd for C<sub>25</sub>H<sub>26</sub>DNNaOSi [M+Na<sup>+</sup>]: 409.1817, found: 409.1716.

### Synthesis of **4f**:

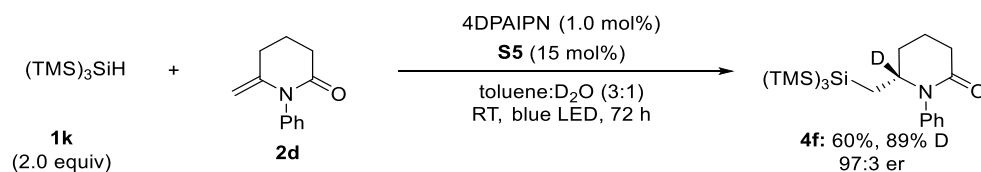

The reaction of 4DPAIPN (1.0 mg, 0.001 mmol), **1k** (50.2 mg, 0.2 mmol), **2d** (18.7 mg, 0.1 mmol), **S5** (8.9 mg, 0.015 mmol), toluene (0.75 mL) and D<sub>2</sub>O (0.25 mL) under room temperature afforded **4f** (26.3 mg, 60%, 89% D) (eluent: petroleum ether/ethyl acetate = 2/1) as a white solid: 97:3 er (HPLC conditions: Chiralcel OD-H column, hexane/*i*-PrOH = 90/10, 0.5 mL/min,  $\lambda$  = 214 nm,  $t_R$  (major) = 9.8 min,  $t_R$  (minor) = 10.6 min);  $[\alpha]_D^{25}$  = -58.5 ( $c$  = 0.19, CHCl<sub>3</sub>); **m.p.** 108-112 °C; **<sup>1</sup>H NMR** (400 MHz, CDCl<sub>3</sub>)  $\delta$  = 7.45-7.34 (m, 2 H), 7.31-7.22 (m, 1 H), 7.19-7.09 (m, 2 H), 3.90-3.81 (m, 0.11 H), 2.64-2.44 (m, 2 H), 2.20-2.08 (m, 1 H), 2.07-1.74 (m, 3 H), 1.25-1.16 (m, 1 H), 1.04-0.93 (m, 1 H), 0.06 (s, 27 H); **<sup>13</sup>C NMR** (100 MHz, CDCl<sub>3</sub>)  $\delta$  = 169.7, 141.7, 129.1, 128.3, 127.1, 32.6, 29.2, 17.9, 13.2, 1.1; **HRMS** (ESI) calcd for C<sub>21</sub>H<sub>40</sub>DNNaO<sub>2</sub>Si<sub>4</sub> [M+Na<sup>+</sup>]: 459.2220, found: 459.2221.

### Synthesis of **4g**:

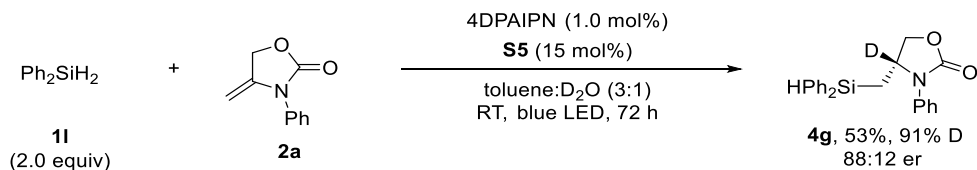

The reaction of 4DPAIPN (0.9 mg, 0.001 mmol), **1i** (37  $\mu\text{L}$ , 0.2 mmol), **2a** (17.4 mg, 0.1 mmol), **S5** (8.6 mg, 0.015 mmol), toluene (0.75 mL) and  $\text{D}_2\text{O}$  (0.25 mL) under room temperature afforded **4g** (19.0 mg, 53%, 91% D) (purified by chromatography on silica gel, eluent: petroleum ether/ethyl acetate = 5/1) as a white solid: 88:12 er (HPLC conditions: Chiralcel AD-H column, hexane/*i*-PrOH = 80/20, 1.0 mL/min,  $\lambda = 214$  nm,  $t_{\text{R}}$  (major) = 6.3 min,  $t_{\text{R}}$  (minor) = 7.6 min);  $[\alpha]_{\text{D}}^{25} = -2.7$  ( $c = 0.09$ ,  $\text{CHCl}_3$ ); **m.p.** 103-105  $^\circ\text{C}$ ;  **$^1\text{H NMR}$**  (400 MHz,  $\text{CDCl}_3$ )  $\delta = 7.75$ -6.99 (m, 15 H), 4.97-4.85 (m, 1 H), 4.60-4.44 (m, 0.09 H), 4.35 (d,  $J = 8.8$  Hz, 1 H), 3.98 (d,  $J = 8.8$  Hz, 1 H), 1.89-1.75 (m, 1 H), 1.47-1.37 (m, 1 H);  **$^{13}\text{C NMR}$**  (100 MHz,  $\text{CDCl}_3$ )  $\delta = 155.5$ , 136.1, 135.0, 134.94, 133.91, 132.0, 131.8, 130.5, 130.4, 129.2, 128.5, 128.3, 125.3, 122.2, 122.0, 68.2, 17.1; **HRMS** (ESI) calcd for  $\text{C}_{22}\text{H}_{20}\text{DNNaO}_2\text{Si}$  [ $\text{M}+\text{Na}^+$ ]: 383.1297, found: 383.1298.

### Synthesis of **4h**:

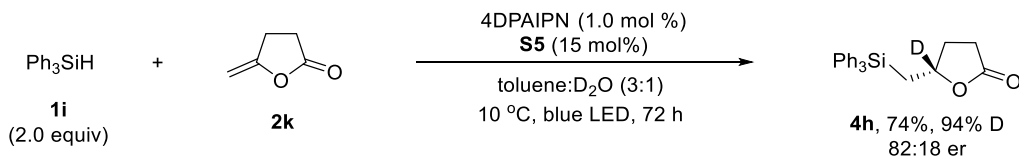

The reaction of 4DPAIPN (1.6 mg, 0.002 mmol), **1i** (105.0 mg, 0.4 mmol), **2k** (13.2 mg, 0.2 mmol), **S5** (17.5 mg, 0.03 mmol), toluene (1.5 mL) and  $\text{D}_2\text{O}$  (0.5 mL) afforded **4h** (34.7 mg, 74%, 94% D) (purified by chromatography on silica gel, eluent: petroleum ether/ethyl acetate = 5/1) as a white solid: 82:18 er (HPLC conditions: Chiralcel AD-H column, hexane/*i*-PrOH = 96/4, 1.0 mL/min,  $\lambda = 214$  nm,  $t_{\text{R}}$  (major) = 10.2 min,  $t_{\text{R}}$  (minor) = 11.2 min);  $[\alpha]_{\text{D}}^{25} = +5.53$  ( $c = 0.36$ ,  $\text{CHCl}_3$ ); **m.p.** 85-86  $^\circ\text{C}$ ;  **$^1\text{H NMR}$**  (400 MHz,  $\text{CDCl}_3$ )  $\delta = 7.64$ -7.48 (m, 6 H), 7.48-7.25 (m, 9 H), 4.78-4.67 (m, 0.06 H), 2.47-2.29 (m, 2 H), 2.20 (d,  $J = 14.4$  Hz, 1 H), 2.00-1.90 (m, 1 H), 1.78 (d,  $J = 14.8$  Hz, 1 H), 1.71-1.57 (m, 1 H);  **$^{13}\text{C NMR}$**  (100 MHz,  $\text{CDCl}_3$ )  $\delta = 176.8$ , 135.5, 133.6, 129.8, 128.1, 79.0 (t,  $J_{\text{C-D}} = 22.7$  Hz), 30.6, 29.4, 21.3; **HRMS** (ESI) calcd for  $\text{C}_{23}\text{H}_{21}\text{DNaO}_2\text{Si}$  [ $\text{M}+\text{Na}^+$ ]: 382.1344, found: 382.1343.

### Synthesis of **4i**:

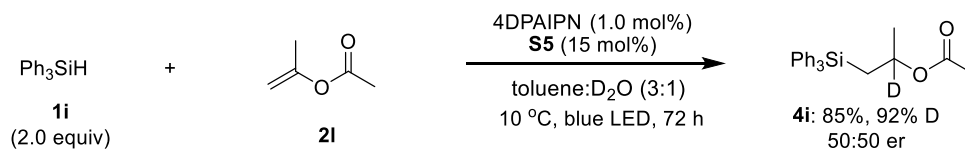

The reaction of 4DPAIPN (1.6 mg, 0.002 mmol), **1i** (104.3 mg, 0.4 mmol), **2i** (20.0 mg, 0.2 mmol), **S5** (16.8 mg, 0.03 mmol), toluene (1.5 mL) and D<sub>2</sub>O (0.5 mL) afforded **4i** (61.8 mg, 85%, 92% D) (purified by chromatography on silica gel, eluent: petroleum ether/ethyl acetate = 5/1) as an oil: 50:50 er (HPLC conditions: Chiralcel OJ-H column, hexane/*i*-PrOH = 99/1, 1.0 mL/min,  $\lambda = 214$  nm,  $t_R$  (major) = 7.6 min,  $t_R$  (minor) = 11.2 min); **<sup>1</sup>H NMR** (400 MHz, CDCl<sub>3</sub>)  $\delta = 7.65\text{-}7.47$  (m, 6 H), 7.45-7.29 (m, 9 H), 5.21-5.09 (m, 0.08 H), 1.95 (d,  $J = 14.8$  Hz, 1 H), 1.75-1.62 (m, 4 H), 1.19 (s, 3 H); **<sup>13</sup>C NMR** (100 MHz, CDCl<sub>3</sub>)  $\delta = 170.3, 135.6, 134.5, 129.5, 127.9, 68.8$  (t,  $J_{\text{C-D}} = 23.1$  Hz), 23.4, 21.8, 21.0; **HRMS** (ESI) calcd for C<sub>23</sub>H<sub>23</sub>DNaO<sub>2</sub>Si [M+Na<sup>+</sup>]: 384.1501, found: 384.1500.

### Synthesis of **4j**:

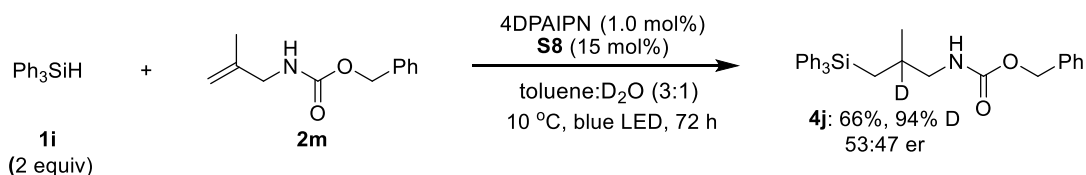

The reaction of 4DPAIPN (1.8 mg, 0.002 mmol), **1i** (104.2 mg, 0.4 mmol), **2m** (40.7 mg, 0.2 mmol), **S8** (22.1 mg, 0.03 mmol), toluene (1.5 mL) and D<sub>2</sub>O (0.5 mL) afforded **4j** (61.6 mg, 66%, 94% D) (purified by chromatography on silica gel, eluent: petroleum ether/ethyl acetate = 5/1) as an oil: 53:47 er (HPLC conditions: Chiralcel AD-H column, hexane/*i*-PrOH = 96/4, 1.0 mL/min,  $\lambda = 214$  nm,  $t_R$  (major) = 12.9 min,  $t_R$  (minor) = 18.2 min); **<sup>1</sup>H NMR** (400 MHz, CDCl<sub>3</sub>)  $\delta = 7.62\text{-}7.16$  (m, 20 H), 5.06 (s, 2 H), 4.67 (s, 1 H), 3.15-2.95 (m, 2 H), 1.97-1.83 (m, 0.06 H), 1.49 (d,  $J = 15.2$  Hz, 1 H), 1.24 (d,  $J = 14.8$  Hz, 1 H), 0.80 (s, 3 H); **<sup>13</sup>C NMR** (100 MHz, CDCl<sub>3</sub>)  $\delta = 156.5, 136.6, 135.6, 135.1, 129.5, 128.5, 128.1, 127.9, 66.6, 49.7, 20.5, 18.2$ ; **HRMS** (ESI) calcd for C<sub>30</sub>H<sub>30</sub>DNNaO<sub>2</sub>Si [M+Na<sup>+</sup>]: 489.2079, found: 489.2078.

### Synthesis of **5a**:

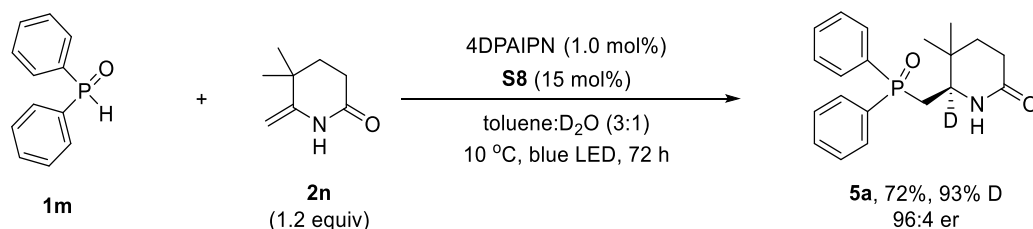

The reaction of 4DPAIPN (1.5 mg, 0.002 mmol), **1m** (40.6 mg, 0.2 mmol), **2n** (33.8 mg, 0.24 mmol), **S8** (21.7 mg, 0.03 mmol), toluene (1.5 mL) and D<sub>2</sub>O (0.5 mL) afforded **5a** (42.9 mg, 72%, 93% D) (purified by chromatography on silica gel, eluent: dichloromethane/methanol = 30/1) as a white solid: 96:4 er, (HPLC conditions: Chiralcel AD-H column, hexane/*i*-PrOH = 65/35, 0.5 mL/min,  $\lambda = 214$  nm,  $t_R$  (major) = 14.0 min,  $t_R$  (minor) = 15.1 min);  $[\alpha]_D^{25} = -80.6$  ( $c = 0.21$ , CHCl<sub>3</sub>); **m.p.** 172-173 °C; **<sup>1</sup>H NMR** (400 MHz, CDCl<sub>3</sub>)  $\delta = 7.87$ -7.65 (m, 4 H), 7.64-7.45 (m, 6 H), 7.34 (brs, 1 H), 3.37 (t,  $J = 11.2$  Hz, 0.07 H), 2.44-2.09 (m, 4 H), 1.64-1.49 (m, 2 H), 1.02-0.84 (m, 6 H); **<sup>13</sup>C NMR** (100 MHz, CDCl<sub>3</sub>)  $\delta = 170.6$ , 133.1 (d,  $J_{C-P} = 99.9$  Hz), 132.24 (d,  $J_{C-P} = 2.6$  Hz), 132.19 (d,  $J_{C-P} = 2.8$  Hz), 131.1 (d,  $J_{C-P} = 9.0$  Hz), 130.4 (d,  $J_{C-P} = 98.1$  Hz), 130.3 (d,  $J_{C-P} = 9.6$  Hz), 128.9 (d,  $J_{C-P} = 7.4$  Hz), 128.8 (d,  $J_{C-P} = 7.6$  Hz), 34.9, 32.0 (d,  $J_{C-P} = 11.6$  Hz), 30.1 (d,  $J_{C-P} = 70.1$  Hz), 28.2, 26.7, 18.6; **<sup>31</sup>P NMR** (162 MHz, CDCl<sub>3</sub>)  $\delta = 33.4$ ; **HRMS** (ESI) calcd for C<sub>20</sub>H<sub>23</sub>DNNaO<sub>2</sub>P [M+Na<sup>+</sup>]: 365.1500, found: 365.1497.

### Synthesis of **5b**:

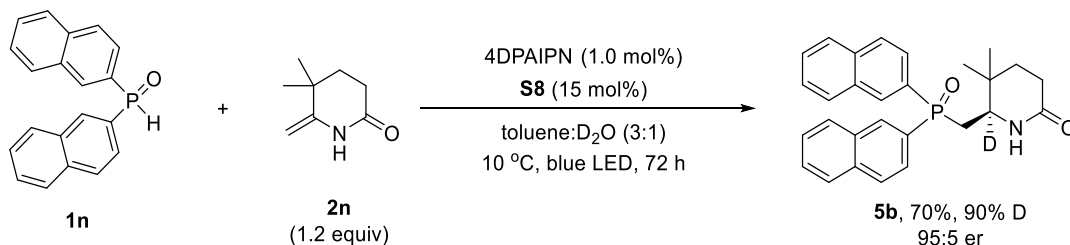

The reaction of 4DPAIPN (1.7 mg, 0.002 mmol), **1n** (60.4 mg, 0.2 mmol), **2n** (34.6 mg, 0.24 mmol), **S8** (21.8 mg, 0.03 mmol), toluene (1.5 mL) and D<sub>2</sub>O (0.5 mL) afforded **5b** (63.2 mg, 70%, 90% D) (purified by chromatography on silica gel, eluent: dichloromethane/methanol = 20/1) as a white solid: 95:5 er, (HPLC conditions: Chiralcel OD-H column, hexane/*i*-PrOH = 80/20, 1 mL/min,  $\lambda = 214$  nm,  $t_R$  (minor) = 71.6 min,  $t_R$  (major) = 82.0 min);  $[\alpha]_D^{25} = -104.4$  ( $c = 0.24$ , CHCl<sub>3</sub>); **m.p.** 209-211 °C; **<sup>1</sup>H NMR** (400 MHz, CDCl<sub>3</sub>)  $\delta = 8.58$  (d,  $J = 13.2$  Hz, 1 H), 8.32 (d,  $J = 13.6$  Hz, 1 H), 8.01-7.83 (m, 6 H), 7.76-7.52 (m, 6 H), 7.46 (brs, 1 H), 3.43 (t,  $J =$

11.2 Hz, 0.10 H), 2.62-2.51 (m, 1 H), 2.42-2.22 (m, 3 H), 1.58-1.45 (m, 2 H), 1.00 (s, 3 H), 0.92 (s, 3 H);  $^{13}\text{C}$  NMR (100 MHz,  $\text{CDCl}_3$ )  $\delta$  = 170.6, 134.8 (d,  $J_{\text{C-P}}$  = 2.4 Hz), 134.7 (d,  $J_{\text{C-P}}$  = 2.5 Hz), 134.1 (d,  $J_{\text{C-P}}$  = 7.8 Hz), 132.6 (d,  $J_{\text{C-P}}$  = 12.6 Hz), 132.4 (d,  $J_{\text{C-P}}$  = 13.1 Hz), 132.3 (d,  $J_{\text{C-P}}$  = 9.1 Hz), 130.2 (d,  $J_{\text{C-P}}$  = 100.4 Hz), 129.1-128.7 (m), 128.5, 128.4, 127.9-127.8 (m), 127.4 (d,  $J_{\text{C-P}}$  = 98.4 Hz), 127.3, 127.2, 125.3-125.0 (m), 35.0, 32.1 (d,  $J_{\text{C-P}}$  = 11.7 Hz), 30.0 (d,  $J_{\text{C-P}}$  = 70.3 Hz), 28.3, 26.8, 18.7;  $^{31}\text{P}$  NMR (162 MHz,  $\text{CDCl}_3$ )  $\delta$  = 33.7; HRMS (ESI) calcd for  $\text{C}_{28}\text{H}_{28}\text{DNO}_2\text{P}$  [ $\text{M}+\text{H}^+$ ]: 443.1993, found: 443.1995.

### Synthesis of **5c**:

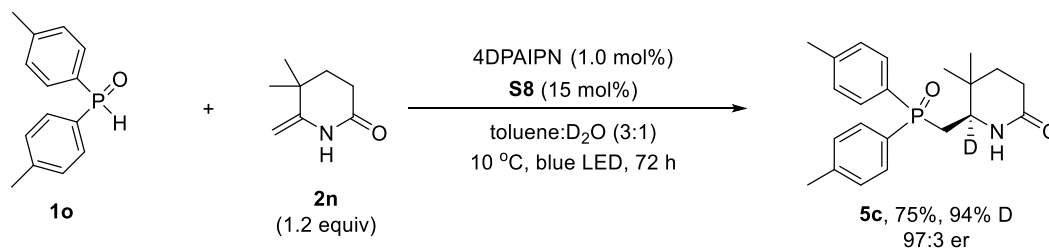

The reaction of 4DPAIPN (1.9 mg, 0.002 mmol), **1o** (46.1 mg, 0.2 mmol), **2n** (36.6 mg, 0.24 mmol), **S8** (22.0 mg, 0.03 mmol), toluene (1.5 mL) and  $\text{D}_2\text{O}$  (0.5 mL) afforded **5c** (55.5 mg, 75%, 94% D) (purified by chromatography on silica gel, eluent: dichloromethane/methanol = 30/1) as a white solid: 97:3 er (HPLC conditions: Chiralcel AD-H column, hexane/*i*-PrOH = 60/40, 0.5 mL/min,  $\lambda$  = 214 nm,  $t_{\text{R}}$  (major) = 15.5 min,  $t_{\text{R}}$  (minor) = 24.9 min);  $[\alpha]_{\text{D}}^{25}$  = -76.0 ( $c$  = 0.24,  $\text{CHCl}_3$ ); **m.p.** 115-118 °C;  $^1\text{H}$  NMR (400 MHz,  $\text{CDCl}_3$ )  $\delta$  = 7.72-7.50 (m, 4 H), 7.44-7.16 (m, 5 H), 3.44-3.25 (m, 0.06 H), 2.49-2.21 (m, 9 H), 2.19-2.03 (m, 1 H), 1.63-1.47 (m, 2 H), 0.95 (s, 3 H), 0.90 (s, 3 H);  $^{13}\text{C}$  NMR (100 MHz,  $\text{CDCl}_3$ )  $\delta$  = 170.6, 142.74-142.61 (m), 131.1 (d,  $J_{\text{C-P}}$  = 9.3 Hz), 130.3 (d,  $J_{\text{C-P}}$  = 9.9 Hz), 130.1 (d,  $J_{\text{C-P}}$  = 102.4 Hz), 129.7-129.3 (m), 127.3 (d,  $J_{\text{C-P}}$  = 100.5 Hz), 56.7 (t,  $J_{\text{C-D}}$  = 24.7 Hz), 35.0, 32.0 (d,  $J_{\text{C-P}}$  = 11.6 Hz), 30.3 (d,  $J_{\text{C-P}}$  = 70.3 Hz), 28.2, 26.8, 21.6-21.4 (m), 18.7;  $^{31}\text{P}$  NMR (162 MHz,  $\text{CDCl}_3$ )  $\delta$  = 33.7; HRMS (ESI) calcd for  $\text{C}_{22}\text{H}_{28}\text{DNO}_2\text{P}$  [ $\text{M}+\text{H}^+$ ]: 371.1993, found: 371.1992.

### Synthesis of **5d**:

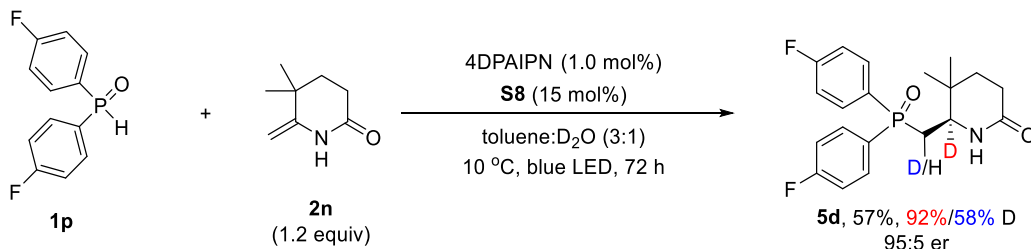

The reaction of 4DPAIPN (2.0 mg, 0.002 mmol), **1p** (47.4 mg, 0.2 mmol), **2n** (34.2 mg, 0.24 mmol), **S8** (21.7 mg, 0.03 mmol), toluene (1.5 mL) and D<sub>2</sub>O (0.5 mL) afforded **5d** (43.3 mg, 57%, 92%/58% D) (purified by chromatography on silica gel, eluent: dichloromethane/methanol = 30/1) as a white solid: 95:5 er (HPLC conditions: Chiralcel AS-H column, hexane/*i*-PrOH = 80/20, 0.5 mL/min,  $\lambda$  = 214 nm,  $t_R$  (minor) = 22.2 min,  $t_R$  (major) = 32.0 min);  $[\alpha]_D^{25}$  = -66.8 ( $c$  = 0.40, CHCl<sub>3</sub>); **m.p.** 150-152 °C; **<sup>1</sup>H NMR** (400 MHz, CDCl<sub>3</sub>)  $\delta$  = 7.91-7.58 (m, 4 H), 7.37-7.09 (m, 5 H), 3.39-3.3.26 (m, 0.08 H), 2.46-2.24 (m, 2.42 H), 2.23-2.10 (m, 1 H), 1.67-1.49 (m, 2 H), 1.03-0.80 (m, 6 H); **<sup>13</sup>C NMR** (100 MHz, CDCl<sub>3</sub>)  $\delta$  = 170.7, 166.5 (dd,  $J_1$  = 10.8 Hz,  $J_2$  = 3.3 Hz), 163.9 (dd,  $J_1$  = 10.6 Hz,  $J_2$  = 3.3 Hz), 133.7-133.4 (m), 132.8 (dd,  $J_1$  = 11.1 Hz,  $J_2$  = 8.9 Hz), 128.9 (dd,  $J_1$  = 102.9 Hz,  $J_2$  = 3.2 Hz), 126.1 (dd,  $J_1$  = 101.4 Hz,  $J_2$  = 3.1 Hz), 116.8-116.2 (m), 34.9, 32.0 (d,  $J_{C-P}$  = 11.7 Hz), 30.4 (d,  $J_{C-P}$  = 71.3 Hz), 28.2, 26.7, 18.7; **<sup>19</sup>F NMR** (376 MHz, CDCl<sub>3</sub>)  $\delta$  = -105.47, -105.48; **<sup>31</sup>P NMR** (162 MHz, CDCl<sub>3</sub>)  $\delta$  = 32.4; **HRMS** (ESI) calcd for C<sub>20</sub>H<sub>20</sub>D<sub>2</sub>F<sub>2</sub>NNaO<sub>2</sub>P [M+Na<sup>+</sup>]: 402.1374, found: 402.1370.

### Synthesis of **5e**:

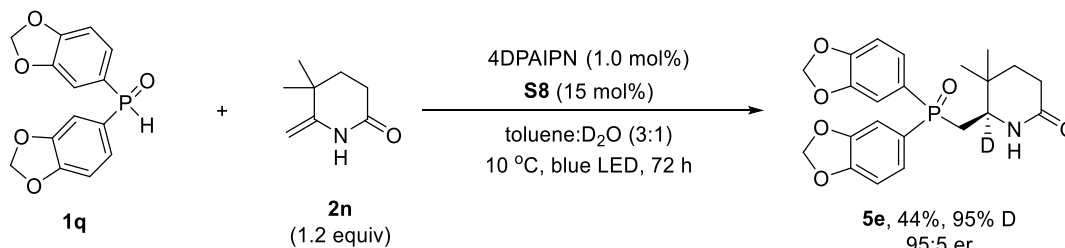

The reaction of 4DPAIPN (1.9 mg, 0.002 mmol), **1q** (58.0 mg, 0.2 mmol), **2n** (34.7 mg, 0.2 mmol), **S8** (21.6 mg, 0.03 mmol), toluene (1.5 mL) and D<sub>2</sub>O (0.5 mL) afforded **5e** (37.5 mg, 44%, 95% D) (purified by chromatography on silica gel, eluent: dichloromethane/methanol = 30/1) as a white solid: 95:5 er (HPLC conditions: Chiralcel AD-H column, hexane/*i*-PrOH = 70/30, 1 mL/min,  $\lambda$  = 214 nm,  $t_R$  (major) = 18.6 min,  $t_R$  (minor) = 22.4 min);  $[\alpha]_D^{25}$  = -71.5 ( $c$  =

0.22, CHCl<sub>3</sub>); **m.p.** 185-186 °C; <sup>1</sup>H NMR (400 MHz, CDCl<sub>3</sub>) δ = 7.36-7.03 (m, 5 H), 7.01-6.83 (m, 2 H), 6.20-5.87 (m, 4 H), 3.37 (t, *J* = 11.2 Hz, 0.05 H), 2.42-2.19 (m, 3 H), 2.15-1.94 (m, 1 H), 1.66-1.50 (m, 2 H), 1.01-0.82 (m, 6 H); <sup>13</sup>C NMR (100 MHz, CDCl<sub>3</sub>) δ = 170.7, 151.1 (d, *J*<sub>C-P</sub> = 2.9 Hz), 151.0 (d, *J*<sub>C-P</sub> = 2.9 Hz), 148.5-148.1 (m), 126.3 (d, *J*<sub>C-P</sub> = 104.6 Hz), 126.4 (d, *J*<sub>C-P</sub> = 9.9 Hz), 125.6 (d, *J*<sub>C-P</sub> = 10.6 Hz), 123.4 (d, *J*<sub>C-P</sub> = 102.9 Hz), 110.3 (d, *J*<sub>C-P</sub> = 11.9 Hz), 109.8 (d, *J*<sub>C-P</sub> = 12.5 Hz), 109.1 (d, *J*<sub>C-P</sub> = 9.0 Hz), 108.9 (d, *J*<sub>C-P</sub> = 9.4 Hz), 101.8 (d, *J*<sub>C-P</sub> = 6.6 Hz), 35.0, 32.0 (d, *J*<sub>C-P</sub> = 11.7 Hz), 30.4 (d, *J*<sub>C-P</sub> = 71.6 Hz), 28.2, 26.8, 18.7; <sup>31</sup>P NMR (162 MHz, CDCl<sub>3</sub>) δ = 33.8; **HRMS** (ESI) calcd for C<sub>22</sub>H<sub>23</sub>DNNaO<sub>6</sub>P [M+Na<sup>+</sup>]: 453.1296, found: 453.1298.

### Synthesis of **5f**:

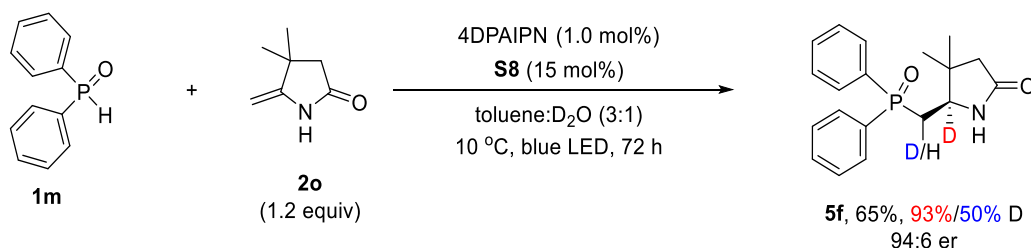

The reaction of 4DPAIPN (2.0 mg, 0.002 mmol), **1m** (40.6 mg, 0.2 mmol), **2o** (34.9 mg, 0.24 mmol), **S8** (22.0 mg, 0.03 mmol), toluene (1.5 mL) and D<sub>2</sub>O (0.5 mL) afforded **5f** (42.7 mg, 65%, 93%/50% D) (purified by chromatography on silica gel, eluent: dichloromethane/methanol = 30/1) as a white solid: 94:6 er (HPLC conditions: Chiralcel AD-H column, hexane/*i*-PrOH = 60/40, 0.5 mL/min, λ = 214 nm, *t*<sub>R</sub> (major) = 12.1 min, *t*<sub>R</sub> (minor) = 12.9 min); [α]<sub>D</sub><sup>25</sup> = -78.1 (*c* = 0.28, CHCl<sub>3</sub>); **m.p.** 149-153 °C; <sup>1</sup>H NMR (400 MHz, CDCl<sub>3</sub>) δ = 7.85-7.66 (m, 4 H), 7.63-7.43 (m, 6 H), 6.70 (brs, 1 H), 3.54-3.44 (m, 0.07 H), 2.41-2.31 (m, 0.5 H), 2.30-1.94 (m, 3 H), 1.09-1.00 (m, 6 H); <sup>13</sup>C NMR (100 MHz, CDCl<sub>3</sub>) δ = 175.6, 132.8 (d, *J*<sub>C-P</sub> = 99.8 Hz), 132.3-132.1 (m), 131.3, 130.8 (d, *J*<sub>C-P</sub> = 9.1 Hz), 130.3 (d, *J*<sub>C-P</sub> = 9.7 Hz), 129.0 (d, *J*<sub>C-P</sub> = 6.2 Hz), 128.8 (d, *J*<sub>C-P</sub> = 5.3 Hz), 45.6, 39.1 (d, *J*<sub>C-P</sub> = 11.9 Hz), 29.6 (d, *J*<sub>C-P</sub> = 70.7 Hz), 25.6, 22.6; <sup>31</sup>P NMR (162 MHz, CDCl<sub>3</sub>) δ = 32.4; **HRMS** (ESI) calcd for C<sub>19</sub>H<sub>20</sub>D<sub>2</sub>NNaO<sub>2</sub>P [M+Na<sup>+</sup>]: 352.1406, found: 352.1401.

### Synthesis of **5g**:

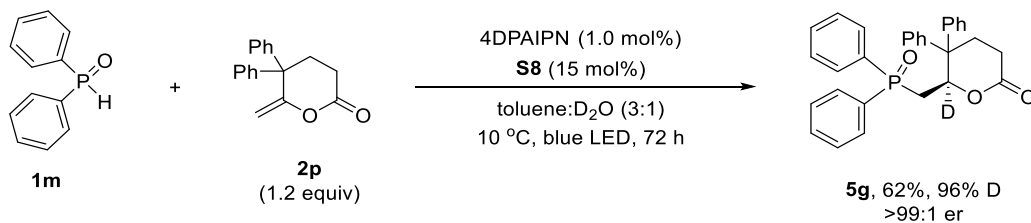

The reaction of 4DPAIPN (1.7 mg, 0.002 mmol), **1m** (40.3 mg, 0.2 mmol), **2p** (63.7 mg, 0.24 mmol), **S8** (22.6 mg, 0.03 mmol), toluene (1.5 mL) and  $\text{D}_2\text{O}$  (0.5 mL) afforded **5g** (57.9 mg, 62%, 96% D) (purified by chromatography on silica gel, eluent: dichloromethane/methanol = 30/1) as a white solid: >99:1 er (HPLC conditions: Chiralcel AD-H column, hexane/*i*-PrOH = 70/30, 1 mL/min,  $\lambda = 214$  nm,  $t_{\text{R}}$  (minor) = 11.6 min,  $t_{\text{R}}$  (major) = 14.7 min);  $[\alpha]_{\text{D}}^{25} = -147.1$  ( $c = 0.28$ ,  $\text{CHCl}_3$ ); **m.p.** 234-236 °C;  $^1\text{H NMR}$  (400 MHz,  $\text{CDCl}_3$ )  $\delta = 7.81$ -7.61 (m, 2 H), 7.59-7.02 (m, 18 H), 5.82 (t,  $J = 10.6$  Hz, 0.04 H), 2.84-2.66 (m, 1 H), 2.65-2.37 (m, 3 H), 2.32-2.09 (m, 2 H);  $^{13}\text{C NMR}$  (100 MHz,  $\text{CDCl}_3$ )  $\delta = 168.3$ , 143.2 (d,  $J_{\text{C-P}} = 10.1$  Hz), 133.1 (d,  $J_{\text{C-P}} = 100.6$  Hz), 131.95 (d,  $J_{\text{C-P}} = 100.8$  Hz), 131.86 (d,  $J_{\text{C-P}} = 2.9$  Hz), 131.78 (d,  $J_{\text{C-P}} = 2.6$  Hz), 131.0 (d,  $J_{\text{C-P}} = 9.5$  Hz), 130.5 (d,  $J_{\text{C-P}} = 9.5$  Hz), 128.9 (d,  $J_{\text{C-P}} = 13.8$  Hz), 128.6 (d,  $J_{\text{C-P}} = 4.5$  Hz), 128.5 (d,  $J_{\text{C-P}} = 4.7$  Hz), 127.9 (d,  $J_{\text{C-P}} = 12.5$  Hz), 127.1 (d,  $J_{\text{C-P}} = 31.3$  Hz), 48.5 (d,  $J_{\text{C-P}} = 9.2$  Hz), 33.5 (d,  $J_{\text{C-P}} = 70.2$  Hz), 27.9, 27.4;  $^{31}\text{P NMR}$  (162 MHz,  $\text{CDCl}_3$ )  $\delta = 29.4$ ; **HRMS** (ESI) calcd for  $\text{C}_{30}\text{H}_{26}\text{DNaO}_3\text{P}$  [ $\text{M}+\text{Na}^+$ ]: 490.1653, found: 490.1649.

### Synthesis of **5h**:

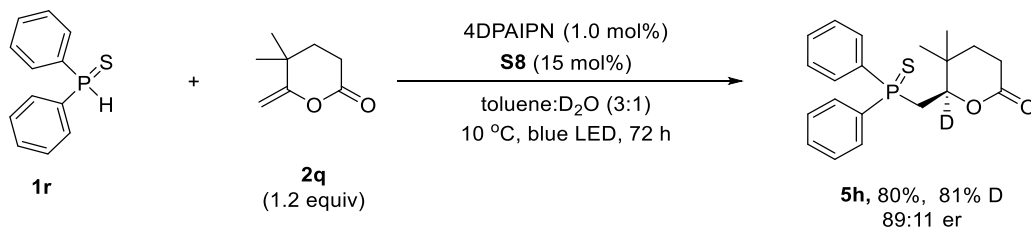

The reaction of 4DPAIPN (1.9 mg, 0.002 mmol), **1r** (42.8 mg, 0.2 mmol), **2q** (33.0 mg, 0.24 mmol), **S8** (21.6 mg, 0.03 mmol), toluene (1.5 mL) and  $\text{D}_2\text{O}$  (0.5 mL) afforded **5h** (57.0 mg, 80%, 81% D) (purified by chromatography on silica gel, eluent: petroleum ether/ethyl acetate = 5/1) as a white solid: 89:11 er (HPLC conditions: Chiralcel OD-H column, hexane/*i*-PrOH = 88/12, 1 mL/min,  $\lambda = 214$  nm,  $t_{\text{R}}$  (minor) = 9.1 min,  $t_{\text{R}}$  (major) = 9.9 min);  $[\alpha]_{\text{D}}^{25} = -83.1$  ( $c = 0.24$ ,  $\text{CHCl}_3$ ); **m.p.** 151-153 °C;  $^1\text{H NMR}$  (400 MHz,  $\text{CDCl}_3$ )  $\delta = 8.04$ -7.76 (m, 4 H), 7.62-7.33 (m, 6



H), 4.81 (dd,  $J_1 = 15.4$  Hz,  $J_2 = 9.0$  Hz, 0.19 H), 3.06-2.76 (m, 1 H), 2.57-2.24 (m, 3 H), 1.86-1.73 (m, 1 H), 1.66-1.54 (m, 1 H), 1.09-0.87 (m, 6 H);  $^{13}\text{C}$  NMR (100 MHz,  $\text{CDCl}_3$ )  $\delta = 170.1$ , 133.9 (d,  $J_{\text{C-P}} = 82.8$  Hz), 131.8 (d,  $J_{\text{C-P}} = 10.7$  Hz), 131.6 (d,  $J_{\text{C-P}} = 3.1$  Hz), 131.5 (d,  $J_{\text{C-P}} = 2.9$  Hz), 131.4, 130.7 (d,  $J_{\text{C-P}} = 10.0$  Hz), 128.7 (d,  $J_{\text{C-P}} = 12.1$  Hz), 128.2 (d,  $J_{\text{C-P}} = 12.6$  Hz), 81.0-80.4 (m), 34.1 (d,  $J_{\text{C-P}} = 55.9$  Hz), 34.0, 32.4 (d,  $J_{\text{C-P}} = 10.1$  Hz), 27.2, 26.2, 19.8;  $^{31}\text{P}$  NMR (162 MHz,  $\text{CDCl}_3$ )  $\delta = 42.6$ ; HRMS (ESI) calcd for  $\text{C}_{20}\text{H}_{23}\text{DO}_2\text{PS}$  [ $\text{M}+\text{H}^+$ ]: 360.1292, found: 360.1291.

### Synthesis of **5i**:

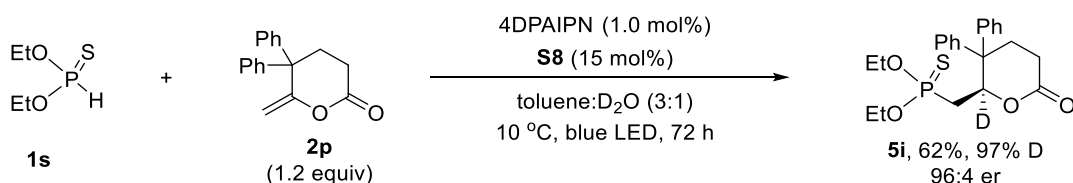

The reaction of 4DPAIPN (2.0 mg, 0.002 mmol), **1s** (30.5 mg, 0.2 mmol), **2p** (65.0 mg, 0.24 mmol), **S8** (22.2 mg, 0.03 mmol), toluene (1.5 ml) and  $\text{D}_2\text{O}$  (0.5 mL) afforded **5i** (51.9 mg, 62%, 97% D) (purified by chromatography on silica gel, eluent: petroleum ether/ethyl acetate = 5/1) as a white solid: 96:4 er (HPLC conditions: Chiralcel IC-H column, hexane/*i*-PrOH = 80/20, 0.5 mL/min,  $\lambda = 214$  nm,  $t_{\text{R}}$  (minor) = 15.6 min,  $t_{\text{R}}$  (major) = 17.8 min);  $[\alpha]_{\text{D}}^{25} = -195.4$  ( $c = 0.25$ ,  $\text{CHCl}_3$ ); **m.p.** 78-79 °C;  $^1\text{H}$  NMR (400 MHz,  $\text{CDCl}_3$ )  $\delta = 7.41$ -7.19 (m, 8 H), 7.17-7.09 (m, 2 H), 5.85-5.75 (m, 0.03 H), 4.27-3.90 (m, 4 H), 2.76-2.50 (m, 3 H), 2.34-2.15 (m, 2 H), 1.86-1.70 (m, 1 H), 1.29 (t,  $J = 7.0$  Hz, 3 H), 1.24 (t,  $J = 7.2$  Hz, 3 H);  $^{13}\text{C}$  NMR (100 MHz,  $\text{CDCl}_3$ )  $\delta = 168.7$ , 143.2 (d,  $J_{\text{C-P}} = 15.4$  Hz), 128.9 (d,  $J_{\text{C-P}} = 8.2$  Hz), 127.3 (d,  $J_{\text{C-P}} = 28.7$  Hz), 127.1 (d,  $J_{\text{C-P}} = 26.0$  Hz), 63.7 (d,  $J_{\text{C-P}} = 6.3$  Hz), 61.9 (d,  $J_{\text{C-P}} = 6.4$  Hz), 48.0 (d,  $J_{\text{C-P}} = 13.9$  Hz), 37.8 (d,  $J_{\text{C-P}} = 112.9$  Hz), 27.5 (d,  $J_{\text{C-P}} = 24.0$  Hz), 16.2 (d,  $J_{\text{C-P}} = 7.1$  Hz), 16.0 (d,  $J_{\text{C-P}} = 7.5$  Hz);  $^{31}\text{P}$  NMR (162 MHz,  $\text{CDCl}_3$ )  $\delta = 94.9$ ; HRMS (ESI) calcd for  $\text{C}_{22}\text{H}_{26}\text{DNaO}_4\text{PS}$  [ $\text{M}+\text{Na}^+$ ]: 442.1323, found: 442.1320.

### Synthesis of **5j**:

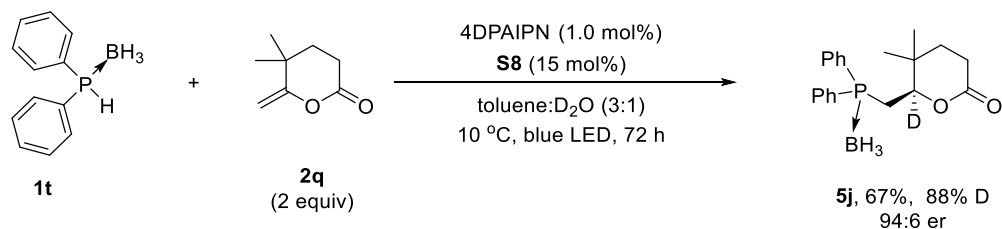

The reaction of 4DPAIPN (1.6 mg, 0.002 mmol), **1t** (37.0 mg, 0.19 mmol), **2q** (56.0 mg, 0.4 mmol), **S8** (21.6 mg, 0.03 mmol), toluene (1.5 ml) and D<sub>2</sub>O (0.5 mL) afforded **5j** (42.3 mg, 67%, 88% D) (purified by chromatography on silica gel, eluent: petroleum ether/ethyl acetate = 2/1) as a white solid: 94:6 er (HPLC conditions: Chiralcel AD-H column, hexane/*i*-PrOH = 70/30, 0.8 mL/min,  $\lambda = 214$  nm,  $t_R$  (minor) = 6.1 min,  $t_R$  (major) = 8.1 min);  $[\alpha]_D^{25} = -32.4^\circ$  ( $c = 0.17$ , CHCl<sub>3</sub>); **m.p.** 117-119 °C; **<sup>1</sup>H NMR** (400 MHz, CDCl<sub>3</sub>)  $\delta = 7.88$ -7.75 (m, 2 H), 7.75-7.62 (m, 2 H), 7.57-7.33 (m, 6 H), 4.55-4.43 (m, 0.12 H), 2.70-2.57 (m, 1 H), 2.54-2.36 (m, 2 H), 2.29-2.18 (m, 1 H), 1.79-1.68 (m, 1 H), 1.65-1.54 (m, 1 H), 1.50-0.55 (m, 9 H); **<sup>13</sup>C NMR** (100 MHz, CDCl<sub>3</sub>)  $\delta = 170.1$ , 132.9 (d,  $J_{C-P} = 9.8$  Hz), 131.9 (d,  $J_{C-P} = 9.1$  Hz), 131.5 (d,  $J_{C-P} = 2.5$  Hz), 131.2 (d,  $J_{C-P} = 2.5$  Hz), 130.0 (d,  $J_{C-P} = 57.4$  Hz), 128.3 (d,  $J_{C-P} = 9.9$  Hz), 128.5 (d,  $J_{C-P} = 10.4$  Hz), 127.5 (d,  $J_{C-P} = 55.0$  Hz), 81.4 (t,  $J_{C-D} = 23.4$  Hz), 33.9, 32.6 (d,  $J_{C-P} = 8.8$  Hz), 27.6 (d,  $J_{C-P} = 36.5$  Hz), 27.2, 26.2, 19.4; **<sup>31</sup>P NMR** (162 MHz, CDCl<sub>3</sub>)  $\delta = 16.2$  (d,  $J = 77.8$  Hz); **<sup>11</sup>B NMR** (128 MHz, CDCl<sub>3</sub>)  $\delta = -39.4$ ; **HRMS** (ESI) calcd for C<sub>20</sub>H<sub>25</sub>BDNaO<sub>2</sub>P [M+Na<sup>+</sup>]: 364.1718, found: 364.1726.

## Synthesis of **6a**:

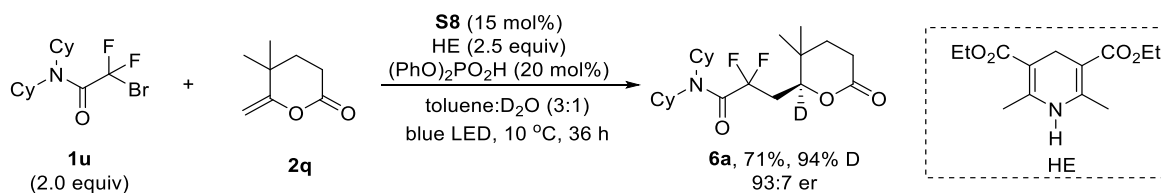

**Typical procedure II:** To an oven-dried 16 x 60 mm vial containing a dry Teflon stir bar were charged with Hantzsch Ester (HE, 63.2 mg, 0.25 mmol), **1u** (68.0 mg, 0.2 mmol), **S8** (10.9 mg, 0.015 mmol), and  $(\text{PhO})_2\text{PO}_2\text{H}$  (4.9 mg, 0.02 mmol), the vial was then taken into a  $\text{N}_2$ -filled glovebox where dry toluene (0.75 mL), **2q** (14.2 mg, 0.1 mmol), and  $\text{D}_2\text{O}$  (0.25 mL) were added sequentially. The vial was sealed with a cap and parafilm and then taken out of the glovebox. The vial was placed in a cooling station and a 30 W blue LED ( $\lambda = 441 \text{ nm}$ ) was then placed on the top of the cooling station (**Supplementary Figure 5**), which is connected to a chiller to maintain the temperature of the cooling water at 10 °C. The reaction mixture was stirred at 10 °C under irradiation with a stirring rate of 400 r/min for 36 h. When the reaction is complete as monitored by TLC and GC,  $\text{CH}_2\text{Cl}_2$  (10 mL) and  $\text{H}_2\text{O}$  (5 mL) were added, the organic layer was separated and the aqueous layer was extracted with  $\text{CH}_2\text{Cl}_2$  (10 mL  $\times$  3). The combined organic layer was washed with brine and dried over anhydrous  $\text{Na}_2\text{SO}_4$ . After filtration and evaporation, the residue was purified by chromatography on silica gel (eluent: petroleum ether/ethyl acetate = 20/1 to 15/1 to 5/1) to afford **6a** (28.1 mg, 71%, 94% D) as a faint yellow oil: 93:7 er (HPLC conditions: Chiralcel AD-H column, hexane/*i*-PrOH = 90/10, 0.5 mL/min,  $\lambda = 214 \text{ nm}$ ,  $t_{\text{R}}$  (major) = 10.0 min,  $t_{\text{R}}$  (minor) = 10.9 min);  $[\alpha]_{\text{D}}^{25} = -44.8$  ( $c = 0.16$ ,  $\text{CHCl}_3$ );  $^1\text{H NMR}$  (400 MHz,  $\text{CDCl}_3$ )  $\delta = 4.43$  (dd,  $J_1 = 9.2 \text{ Hz}$ ,  $J_2 = 1.2 \text{ Hz}$ , 0.06 H), 4.02 (tt,  $J_1 = 11.6 \text{ Hz}$ ,  $J_2 = 3.5 \text{ Hz}$ , 1 H), 3.01 (tt,  $J_1 = 11.8 \text{ Hz}$ ,  $J_2 = 3.8 \text{ Hz}$ , 1 H), 2.66-2.26 (m, 6 H), 1.91-1.02 (m, 23 H), 0.99 (s, 3 H);  $^{13}\text{C NMR}$  (100 MHz,  $\text{CDCl}_3$ )  $\delta = 170.8$ , 162.0 (t,  $J_{\text{C-F}} = 27.1 \text{ Hz}$ ), 118.9 (t,  $J_{\text{C-F}} = 257.1 \text{ Hz}$ ), 80.6 (t,  $J_{\text{C-D}} = 24.0 \text{ Hz}$ ), 57.1, 36.3-35.6 (m), 34.11, 34.08, 31.9, 31.8, 30.9, 29.0, 28.9, 27.1, 26.4, 26.3, 26.23, 26.20, 25.6, 25.5, 25.22, 25.17, 19.3;  $^{19}\text{F NMR}$  (376 MHz,  $\text{CDCl}_3$ )  $\delta = -97.8$  (d,  $J = 279.4 \text{ Hz}$ ), -100.4 (d,  $J = 279.0 \text{ Hz}$ ); **HRMS** (ESI) calcd for  $\text{C}_{22}\text{H}_{34}\text{DF}_2\text{NNaO}_3$  [ $\text{M}+\text{Na}^+$ ]: 423.2540, found: 423.2537.

The following compounds **6b-6f** were prepared according to the above **Typical Procedure II** unless otherwise stated. All the racemic samples for HPLC measurement were also prepared according to this procedure but using CySH instead of the thiol catalyst **S8**.

### Synthesis of **6b**:

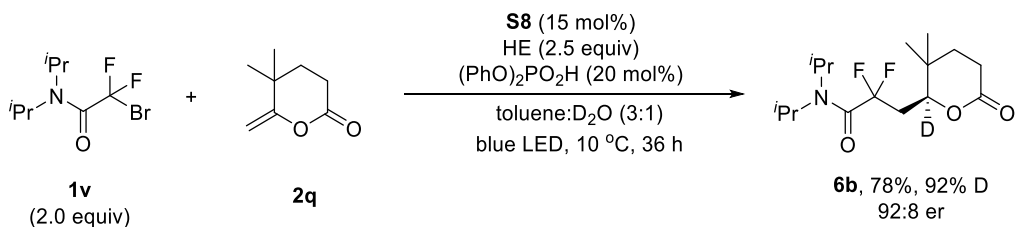

The reaction of HE (63.4 mg, 0.25 mmol), **1v** (51.8 mg, 0.2 mmol), **S8** (10.9 mg, 0.015 mmol), (PhO)<sub>2</sub>PO<sub>2</sub>H (5.1 mg, 0.02 mmol), toluene (0.75 mL), **2q** (14.4 mg, 0.1 mmol) and D<sub>2</sub>O (0.25 mL) afforded **6b** (25.6 mg, 78%, 92% D) (eluent: petroleum ether/ethyl acetate = 20/1 to 10/1 to 5/1) as a faint yellow oil: 92:8 er (HPLC conditions: Chiralcel OD-H column, hexane/*i*-PrOH = 90/10, 0.5 mL/min,  $\lambda = 214$  nm,  $t_R$  (major) = 10.6 min,  $t_R$  (minor) = 11.4 min);  $[\alpha]_D^{25} = -40.1$  ( $c = 0.18$ , CHCl<sub>3</sub>); <sup>1</sup>H NMR (400 MHz, CDCl<sub>3</sub>)  $\delta = 4.56$ -4.40 (m, 1.08 H), 3.56-3.42 (m, 1 H), 2.66-2.44 (m, 3 H), 2.44-2.27 (m, 1 H), 1.86-1.74 (m, 1 H), 1.73-1.61 (m, 1 H), 1.45-1.37 (m, 6 H), 1.26-1.18 (m, 6 H), 1.05 (s, 3 H), 0.99 (s, 3 H); <sup>13</sup>C NMR (100 MHz, CDCl<sub>3</sub>)  $\delta = 170.7$ , 161.7 (t,  $J_{C-F} = 27.3$  Hz), 118.7 (t,  $J_{C-F} = 255.6$  Hz), 48.4 (t,  $J = 7.5$  Hz), 46.9, 35.9 (t,  $J = 22.9$  Hz), 34.1, 31.8, 27.1, 26.2, 20.5, 20.4, 19.81, 19.78, 19.3; <sup>19</sup>F NMR (376 MHz, CDCl<sub>3</sub>)  $\delta = -97.8$  (d,  $J = 279.4$  Hz), -100.6 (d,  $J = 279.4$  Hz); HRMS (ESI) calcd for C<sub>16</sub>H<sub>26</sub>DF<sub>2</sub>NNaO<sub>3</sub> [M+Na<sup>+</sup>]: 343.1914, found: 343.1914.

### Synthesis of **6c**:

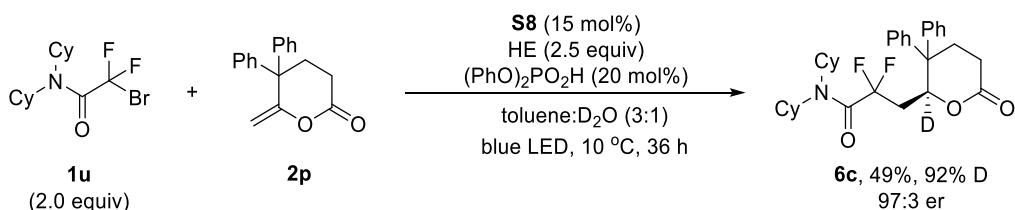

The reaction of HE (63.4 mg, 0.25 mmol), **1u** (67.8 mg, 0.2 mmol), **S8** (10.8 mg, 0.015 mmol), (PhO)<sub>2</sub>PO<sub>2</sub>H (5.3 mg, 0.02 mmol), toluene (0.75 mL), **2p** (26.4 mg, 0.1 mmol) and D<sub>2</sub>O (0.25 mL) afforded **6c** (25.8 mg, 49%, 92% D) (eluent: petroleum ether/ethyl acetate = 15/1 to 8/1) as a faint yellow oil: 97:3 er (HPLC conditions: Chiralcel AD-H column, hexane/*i*-PrOH = 95/5, 1 mL/min,  $\lambda = 214$  nm,  $t_R$  (major) = 9.5 min,  $t_R$  (minor) = 10.6 min);  $[\alpha]_D^{25} = -113.3$  ( $c = 0.16$ , CHCl<sub>3</sub>); <sup>1</sup>H NMR (400 MHz, CDCl<sub>3</sub>)  $\delta = 7.40$ -7.25 (m, 6 H), 7.25-7.13 (m, 4 H), 5.70-5.64 (m, 0.08 H), 4.06-3.90 (m, 1 H), 3.05-2.90 (m, 1 H), 2.88-2.75 (m, 1 H), 2.72-2.49 (m, 3 H),

2.40-1.96 (m, 4 H), 1.86-0.99 (m, 18 H);  $^{13}\text{C}$  NMR (100 MHz,  $\text{CDCl}_3$ )  $\delta$  = 169.1, 161.7, 143.3, 143.24, 143.21, 128.9, 128.8, 127.4, 127.11, 127.07, 127.06, 126.8, 57.1, 47.8, 47.7, 30.9, 29.1, 28.9, 27.3, 26.99, 26.97, 26.4, 26.3, 25.6, 25.5, 25.22, 25.20;  $^{19}\text{F}$  NMR (376 MHz,  $\text{CDCl}_3$ )  $\delta$  = -100.1 (d,  $J$  = 285.0 Hz), -102.6 (d,  $J$  = 285.0 Hz); HRMS (ESI) calcd for  $\text{C}_{32}\text{H}_{38}\text{DF}_2\text{NNaO}_3$  [ $\text{M}+\text{Na}^+$ ]: 547.2853, found: 547.2848.

### Synthesis of **6d**:

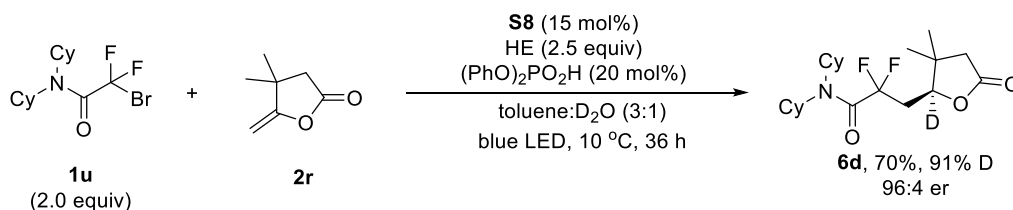

The reaction of HE (63.3 mg, 0.25 mmol), **1u** (67.5 mg, 0.2 mmol), **S8** (10.8 mg, 0.015 mmol),  $(\text{PhO})_2\text{PO}_2\text{H}$  (5.0 mg, 0.02 mmol), toluene (0.75 mL), **2r** (13.0 mg, 0.1 mmol) and  $\text{D}_2\text{O}$  (0.25 mL) afforded **6d** (27.0 mg, 70%, 91% D) (eluent: petroleum ether/ethyl acetate = 20/1 to 15/1 to 10/1) as a faint yellow oil: 96:4 er (HPLC conditions: Chiralcel AD-H column, hexane/*i*-PrOH = 90/10, 0.5 mL/min,  $\lambda$  = 214 nm,  $t_{\text{R}}$  (major) = 9.4 min,  $t_{\text{R}}$  (minor) = 10.4 min);  $[\alpha]_{\text{D}}^{25}$  = -40.6 ( $c$  = 0.18,  $\text{CHCl}_3$ );  $^1\text{H}$  NMR (400 MHz,  $\text{CDCl}_3$ )  $\delta$  = 4.44 (dd,  $J_1$  = 9.6 Hz,  $J_2$  = 1.6 Hz, 0.09 H), 4.03 (tt,  $J_1$  = 11.7 Hz,  $J_2$  = 3.5 Hz, 1 H), 3.02 (tt,  $J_1$  = 12.0 Hz,  $J_2$  = 3.8 Hz, 1 H), 2.66-2.25 (m, 6 H), 1.99-0.99 (m, 24 H);  $^{13}\text{C}$  NMR (100 MHz,  $\text{CDCl}_3$ )  $\delta$  = 175.5, 161.7 (t,  $J$  = 27.0 Hz), 118.70 (t,  $J$  = 257.4 Hz), 81.4 (t,  $J_{\text{C-D}}$  = 23.1 Hz), 57.2-57.0 (m), 44.1, 39.7, 39.6, 34.7-34.2 (m), 30.8, 28.9, 26.27, 26.25, 25.51, 25.47, 25.14, 25.09, 24.1, 21.0;  $^{19}\text{F}$  NMR (376 MHz,  $\text{CDCl}_3$ )  $\delta$  = -97.0 (d,  $J$  = 281.6 Hz), -100.7 (d,  $J$  = 281.6 Hz); HRMS (ESI) calcd for  $\text{C}_{21}\text{H}_{32}\text{DF}_2\text{NNaO}_3$  [ $\text{M}+\text{Na}^+$ ]: 409.2383, found: 409.2387.

### Synthesis of **6e**:

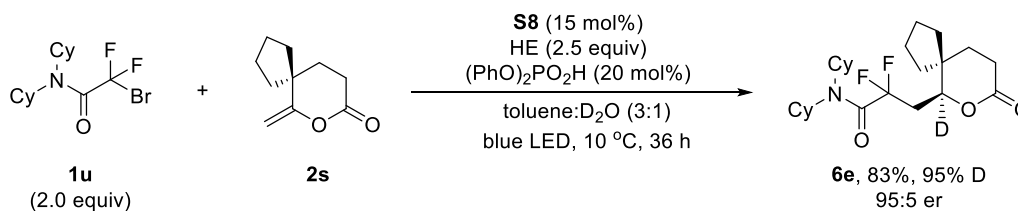

The reaction of HE (63.8 mg, 0.25 mmol), **1u** (67.8 mg, 0.2 mmol), **S8** (10.7 mg, 0.015 mmol), (PhO)<sub>2</sub>PO<sub>2</sub>H (5.2 mg, 0.02 mmol), toluene (0.75 mL), **2s** (17.0 mg, 0.1 mmol) and D<sub>2</sub>O (0.25 mL) afforded **6e** (35.5 mg, 83%, 95% D) (eluent: petroleum ether/ethyl acetate = 20/1 to 15/1 to 7/1) as a faint yellow oil: 95:5 er (HPLC conditions: Chiralcel OD-H column, hexane/*i*-PrOH = 98/2, 1.0 mL/min, λ = 214 nm, *t*<sub>R</sub> (major) = 9.6 min, *t*<sub>R</sub> (minor) = 10.6 min); [α]<sub>D</sub><sup>25</sup> = -35.0 (*c* = 0.16, CHCl<sub>3</sub>); <sup>1</sup>H NMR (400 MHz, CDCl<sub>3</sub>) δ = 4.60-4.53 (m, 0.05 H), 4.03 (tt, *J*<sub>1</sub> = 11.6 Hz, *J*<sub>2</sub> = 3.6 Hz, 1 H), 3.01 (tt, *J*<sub>1</sub> = 11.9 Hz, *J*<sub>2</sub> = 3.7 Hz, 1 H), 2.70-2.30 (m, 6 H), 1.94-1.01 (m, 28 H); <sup>13</sup>C NMR (100 MHz, CDCl<sub>3</sub>) δ = 170.7, 161.9 (t, *J*<sub>C-F</sub> = 27.0 Hz), 119.0 (t, *J*<sub>C-F</sub> = 257.7 Hz), 80.3 (*J*<sub>C-D</sub> = 21.6 Hz), 57.2-57.0 (m), 43.6, 37.1 (t, *J* = 22.7 Hz), 35.7, 32.5, 30.9, 30.8, 29.0, 28.9, 27.3, 26.33, 26.32, 25.6, 25.5, 25.3, 25.20, 25.16, 24.8; <sup>19</sup>F NMR (376 MHz, CDCl<sub>3</sub>) δ = -97.8 (d, *J* = 280.9 Hz), -100.2 (d, *J* = 280.9 Hz); HRMS (ESI) calcd for C<sub>24</sub>H<sub>36</sub>DF<sub>2</sub>NNaO<sub>3</sub> [M+Na<sup>+</sup>]: 449.2696, found: 449.2689.

#### Synthesis of **6f**:

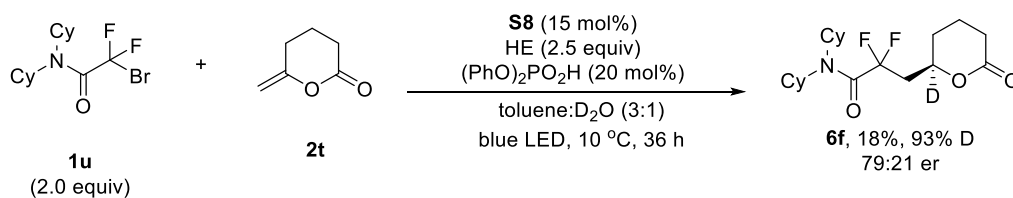

The reaction of HE (63.3 mg, 0.25 mmol), **1u** (67.6 mg, 0.2 mmol), **S8** (10.6 mg, 0.015 mmol), (PhO)<sub>2</sub>PO<sub>2</sub>H (5.0 mg, 0.02 mmol), toluene (0.75 mL), **2t** (11.6 mg, 0.1 mmol) and D<sub>2</sub>O (0.25 mL) afforded **6f** (6.7 mg, 18%, 93% D) (eluent: petroleum ether/ethyl acetate = 20/1 to 15/1 to 7/1) as a faint yellow oil. Unreacted **2t** accounts for the rest of the mass balance. **6f**: 79:21 er (HPLC conditions: Chiralcel OJ-H column, hexane/*i*-PrOH = 99.7/0.3, 0.5 mL/min, λ = 214 nm, *t*<sub>R</sub> (minor) = 40.6 min, *t*<sub>R</sub> (major) = 46.5 min); [α]<sub>D</sub><sup>25</sup> = -19.3 (*c* = 0.22, CHCl<sub>3</sub>); <sup>1</sup>H NMR (400 MHz, CDCl<sub>3</sub>) δ = 4.77-4.63 (m, 0.07 H), 4.07-3.93 (m, 1 H), 3.09-2.95 (m, 1 H), 2.68-2.30 (m, 6 H), 2.18-1.01 (m, 22 H); <sup>13</sup>C NMR (100 MHz, CDCl<sub>3</sub>) δ = 171.1, 161.8, 118.6 (t, *J* = 256.7 Hz), 57.3-57.0 (m), 41.1 (t, *J* = 23.2 Hz), 30.9, 29.1, 29.0, 28.2, 26.4, 25.60, 25.57, 25.2, 18.2; <sup>19</sup>F NMR (376 MHz, CDCl<sub>3</sub>) δ = -96.3 (d, *J* = 282.0 Hz), -99.1 (d, *J* = 282.0 Hz); HRMS (ESI) calcd for C<sub>20</sub>H<sub>31</sub>DF<sub>2</sub>NO<sub>3</sub> [M+H<sup>+</sup>]: 373.2408, found: 373.2400.

## 2.4. Synthetic Applications

### Synthesis of **7**:

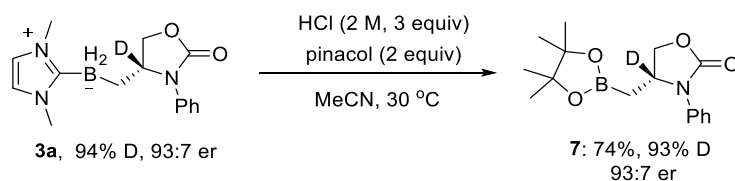

To a solution of **3a** (28.5 mg, 0.1 mmol) in CH<sub>3</sub>CN (2 mL) was added HCl (2 M in water, 150  $\mu$ L, 0.3 mmol) and pinacol (24.9 mg, 0.2 mmol). The reaction mixture was stirred at 30 °C for 1.5 h and then evaporated. The crude material was purified by flash column chromatography on silica gel (eluent: petroleum ether/ethyl acetate = 5/1) to give pinacol boronate ester **7** (22.5 mg, 74%, 93% D) as a colorless oil: 93:7 er (HPLC conditions: Chiralcel OD-H column, hexane/*i*-PrOH = 80/20, 0.5 mL/min,  $\lambda$  = 214 nm,  $t_R$  (major) = 11.8 min,  $t_R$  (minor) = 13.2 min);  $[\alpha]_D^{25}$  = -45.7 ( $c$  = 0.30, CHCl<sub>3</sub>); **<sup>1</sup>H NMR** (400 MHz, CDCl<sub>3</sub>)  $\delta$  = 7.46-7.32 (m, 4 H), 7.24-7.10 (m, 1 H), 4.68-4.52 (m, 1.07 H), 4.06 (d,  $J$  = 8.8 Hz, 1 H), 1.41 (d,  $J$  = 16.4 Hz, 1 H), 1.34-1.15 (m, 12 H) 1.07 (d,  $J$  = 16.0 Hz, 1 H); **<sup>13</sup>C NMR** (100 MHz, CDCl<sub>3</sub>)  $\delta$  = 155.9, 136.4, 129.1, 125.4, 122.7, 83.8, 75.0, 68.6, 24.9, 24.8, 24.6; **<sup>11</sup>B NMR** (128 MHz, CDCl<sub>3</sub>)  $\delta$  = 32.9; **HRMS** (ESI) calcd for C<sub>16</sub>H<sub>21</sub>BDNNaO<sub>4</sub> [M+Na<sup>+</sup>]: 327.1597, found: 327.1601.

### Synthesis of **8**:

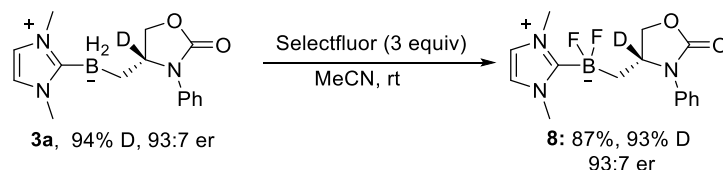

To a solution of **3a** (28.6 mg, 0.1 mmol) in CH<sub>3</sub>CN (2 mL) was added selectfluor (107.5 mg, 0.3 mmol) at room temperature under nitrogen atmosphere. After addition, the reaction mixture was stirred at room temperature for 2 h and then evaporated. The crude material was purified by flash column chromatography on silica gel (eluent: petroleum ether/ethyl acetate = 2/3) to give **8** (27.7 mg, 87%, 93% D) as a colorless oil: 93:7 er (HPLC conditions: Chiralcel OD-H column, hexane/*i*-PrOH = 65/35, 0.5 mL/min,  $\lambda$  = 214 nm,  $t_R$  (major) = 17.2 min,  $t_R$  (minor) = 19.4 min);  $[\alpha]_D^{25}$  = -83.5 ( $c$  = 0.10, CHCl<sub>3</sub>); **<sup>1</sup>H NMR** (400 MHz, CDCl<sub>3</sub>)  $\delta$  = 7.51-7.28 (m, 4 H), 7.19-7.03 (m, 1 H), 6.82 (s, 2 H), 4.74-4.49 (m, 1.07 H), 4.31 (d,  $J$  = 8.8 Hz, 1 H), 3.80 (s, 6 H), 1.03-0.71 (m, 1 H), 0.63-0.42 (m, 1 H); **<sup>13</sup>C NMR** (100 MHz, CDCl<sub>3</sub>)  $\delta$  = 156.3, 137.4, 128.8, 124.2, 121.9,

121.6, 69.6, 69.5, 54.7 (t,  $J_{C-D} = 22.3$  Hz), 36.3 (t,  $J = 4.8$  Hz), 29.7;  $^{11}\text{B}$  NMR (128 MHz,  $\text{CDCl}_3$ )  $\delta = 5.26$ ;  $^{19}\text{F}$  NMR (376 MHz,  $\text{CDCl}_3$ )  $\delta = -155.1$  (m),  $-157.2$  (m); HRMS (ESI) calcd for  $\text{C}_{15}\text{H}_{17}\text{BDF}_2\text{N}_3\text{NaO}_2$  [ $\text{M}+\text{Na}^+$ ]: 345.1415, found: 345.1419.

### Synthesis of **9**:

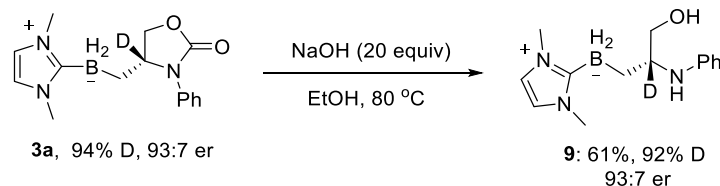

To a solution of **3a** (28.4 mg, 0.1 mmol) in EtOH (2 mL) was added NaOH (80.8 mg, 1 mmol), the reaction mixture was then heated to 80 °C for 10 h. After the reaction reached completion, EtOAc (5 mL) and  $\text{H}_2\text{O}$  (5 mL) were added. The organic layer was separated and the aqueous layer was extracted with EtOAc (5 mL x 3). The combined organic phase was dried over anhydrous  $\text{Na}_2\text{SO}_4$ , and then concentrated under reduced pressure. The residue was purified by chromatography on silica gel (eluent: petroleum ether/ethyl acetate = 20/1) to afford **9** (15.9 mg, 61%, 92% D) as a colorless oil: 93:7 er (HPLC conditions: Chiralcel OD-H column, hexane/*i*-PrOH = 90/10, 0.5 mL/min,  $\lambda = 214$  nm,  $t_R$  (major) = 83.4 min,  $t_R$  (minor) = 90.7 min);  $[\alpha]_D^{25} = -6.8$  ( $c = 0.53$ ,  $\text{CHCl}_3$ );  $^1\text{H}$  NMR (400 MHz,  $\text{CDCl}_3$ )  $\delta = 7.18$ -7.04 (m, 2 H), 6.76 (s, 2 H), 6.68-6.57 (m, 3 H), 3.75 (d,  $J = 10.8$  Hz, 1 H), 3.70-3.60 (m, 7 H), 3.31-2.33 (m, 2.08 H), 0.76-0.54 (m, 2 H);  $^{13}\text{C}$  NMR (100 MHz,  $\text{CDCl}_3$ )  $\delta = 148.8$ , 129.0, 120.2, 116.8, 113.8, 66.7, 56.8 (t,  $J_{C-D} = 19.9$  Hz), 35.7;  $^{11}\text{B}$  NMR (128 MHz,  $\text{CDCl}_3$ )  $\delta = -29.5$  (t,  $J = 67.8$  Hz). HRMS analysis indicated that the  $\text{BH}_2$  moiety of the product was also partially deuterated (see the first entry of the spectrum below).

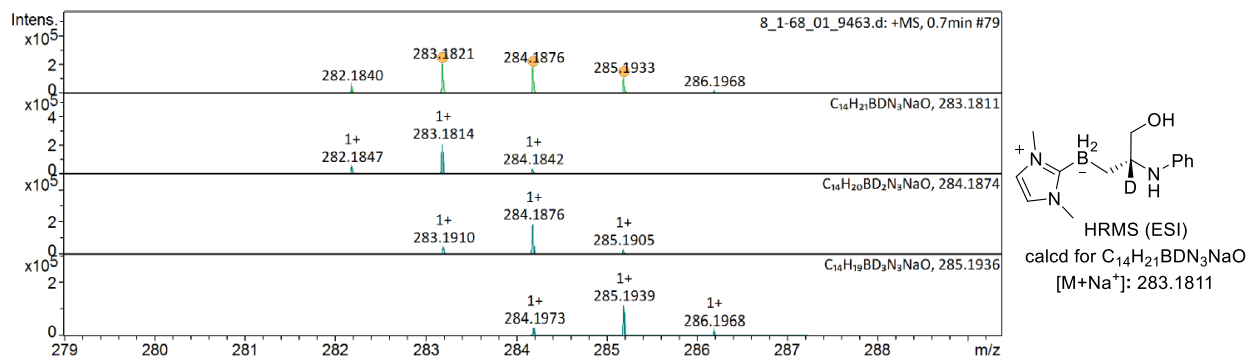



### Synthesis of **10**:

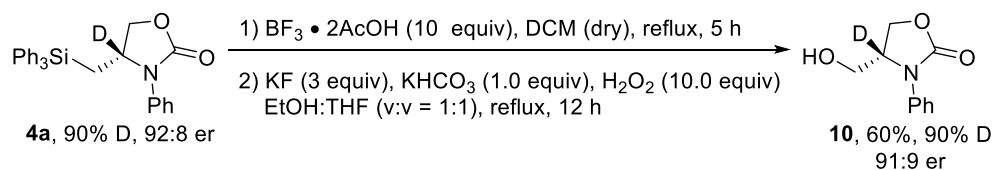

To a solution of **4a** (43.7 mg, 0.1 mmol) in dry  $\text{CH}_2\text{Cl}_2$  (1 mL) was added  $\text{BF}_3 \cdot 2\text{AcOH}$  (140  $\mu\text{L}$ , 1 mmol), the mixture was then heated to reflux for 5 h. The reaction mixture was cooled to ambient temperature, and poured into a saturated aqueous solution of sodium bicarbonate. The aqueous layer was extracted with EtOAc. The combined organic layer was dried over anhydrous  $\text{Na}_2\text{SO}_4$  and concentrated. To a solution of the residue in THF–EtOH (1.2 mL, v/v = 1/1) was added  $\text{KHCO}_3$  (10.5 mg, 0.1 mmol),  $\text{KF}$  (17.9 mg, 0.3 mmol), and a 30% aqueous solution of  $\text{H}_2\text{O}_2$  (120  $\mu\text{L}$ , 1 mmol). The mixture was heated to reflux for 12 h. When the reaction is complete as monitored by TLC, the mixture was poured into an aqueous solution of sodium bicarbonate. The aqueous layer was extracted with EtOAc (10 mL  $\times$  3), and then the combined organic layer was washed with brine and dried over anhydrous  $\text{Na}_2\text{SO}_4$ . After filtration and evaporation, the residue was purified by chromatography on silica gel (eluent: petroleum ether/ethyl acetate = 1/1) to afford **10** (11.7 mg, 60%, 90% D) as a white solid: 91:9 er (HPLC conditions: Chiralcel OD-H column, hexane/*i*-PrOH = 80/20, 0.5 mL/min,  $\lambda$  = 214 nm,  $t_R$  (major) = 18.1 min,  $t_R$  (minor) = 20.6 min);  $[\alpha]_D^{25}$  = -40.0 ( $c$  = 0.15,  $\text{CHCl}_3$ ); **m.p.** 111–113 °C;  $^1\text{H NMR}$  (400 MHz,  $\text{CD}_3\text{OD}$ )  $\delta$  = 7.59–7.46 (m, 2 H), 7.45–7.34 (m, 2 H), 7.27–7.16 (m, 1 H), 4.66–4.49 (m, 1.10 H), 4.43 (d,  $J$  = 8.4 Hz, 1 H), 3.66 (d,  $J$  = 12.0 Hz, 1 H), 3.55 (d,  $J$  = 12.0 Hz, 1 H);  $^{13}\text{C NMR}$  (100 MHz,  $\text{CD}_3\text{OD}$ )  $\delta$  = 158.7, 137.9, 130.1, 126.7, 124.0, 66.0, 60.3, 59.0 (t,  $J_{\text{C-D}}$  = 22.1 Hz); **HRMS** (ESI) calcd for  $\text{C}_{10}\text{H}_{10}\text{DNNaO}_3$  [ $\text{M}+\text{Na}^+$ ]: 217.0694, found: 217.0696.

### Synthesis of **11**:

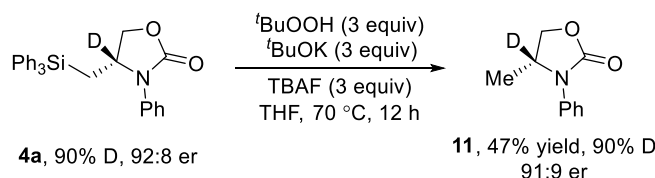

Under nitrogen atmosphere,  $t\text{BuOK}$  (68.2 mg, 0.6 mmol), THF (2.0 mL), and  $t\text{BuOOH}$  (70% in water, 79.3 mg, 0.6 mmol) were added to a 10 mL flame-dried Schlenk flask at 0 °C. The mixture was stirred for 10 minutes, then a solution of **4a** (87.4 mg, 0.2 mmol) in 1 mL of THF

and 0.6 mL of TBAF (1.0 M in THF, 0.6 mmol) were added sequentially, the resulted mixture was stirred at 70 °C for 12 h. The reaction mixture was allowed to cool to room temperature before ether (5 mL) and H<sub>2</sub>O (5 mL) were added. The organic layer was separated and the aqueous layer was extracted with ether (5 mL x 3). The combined organic phase was dried over anhydrous Na<sub>2</sub>SO<sub>4</sub> and then concentrated under reduced pressure. The residue was purified by chromatography on silica gel (eluent: petroleum ether/ethyl acetate = 5/1) to afford **11** (16.8 mg, 47%, 90% D) as a colorless oil : 91:9 er (HPLC conditions: Chiralcel AD-H column, hexane/*i*-PrOH = 90/10, 1 mL/min,  $\lambda$  = 214 nm,  $t_R$  (major) = 10.9 min,  $t_R$  (minor) = 12.1 min);  $[\alpha]_D^{25}$  = -53.8 ( $c$  = 0.11, CHCl<sub>3</sub>); <sup>1</sup>H NMR (400 MHz, CDCl<sub>3</sub>)  $\delta$  = 7.46-7.34 (m, 4 H), 7.23-7.15 (m, 1 H), 4.63-4.47 (m, 1.10 H), 4.02 (d,  $J$  = 8.4 Hz, 1 H), 1.33 (s, 3 H); <sup>13</sup>C NMR (100 MHz, CDCl<sub>3</sub>)  $\delta$  = 155.7, 136.5, 129.1, 125.2, 122.0, 121.9, 68.5, 51.9 (t,  $J_{C-D}$  = 22.0 Hz), 18.3; HRMS (ESI) calcd for C<sub>10</sub>H<sub>10</sub>DNNaO<sub>2</sub> [M+Na<sup>+</sup>]: 201.0745, found: 201.0744.

#### Synthesis of **12**:

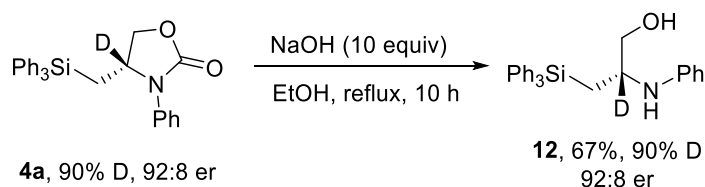

To a solution of **4a** (43.7 mg, 0.1 mmol) in EtOH (1 mL) was added NaOH (41.2 mg, 1 mmol), the reaction mixture was then heated to reflux for 10 h. The reaction mixture was allowed to cool to room temperature, EtOAc (5 mL) and H<sub>2</sub>O (5 mL) were added. The organic layer was separated and the aqueous layer was extracted with EtOAc (5 mL x 3). The combined organic phase was dried over anhydrous Na<sub>2</sub>SO<sub>4</sub>, and then concentrated under reduced pressure. The residue was purified by chromatography on silica gel (eluent: petroleum ether/ethyl acetate = 5/1) to afford **12** (27.5 mg, 67%, 90% D) as a colorless oil: 92:8 er (HPLC conditions: Chiralcel OJ-H column, hexane/*i*-PrOH = 85/15, 1 mL/min,  $\lambda$  = 214 nm,  $t_R$  (minor) = 9.3 min,  $t_R$  (major) = 14.3 min);  $[\alpha]_D^{25}$  = +9.3 ( $c$  = 0.23, CHCl<sub>3</sub>); <sup>1</sup>H NMR (400 MHz, CDCl<sub>3</sub>)  $\delta$  = 7.55-7.44 (m, 6 H), 7.43-7.24 (m, 9 H), 7.06 (t,  $J$  = 8.0 Hz, 2 H), 6.69 (t,  $J$  = 7.4 Hz, 1 H), 6.29 (d,  $J$  = 7.6 Hz, 2 H), 3.73-3.66 (m, 0.1 H), 3.61 (d,  $J$  = 11.2 Hz, 1 H), 3.43 (d,  $J$  = 10.8 Hz, 1 H), 3.30-2.42 (m, 2 H), 1.87-1.16 (m, 2 H); <sup>13</sup>C NMR (100 MHz, CDCl<sub>3</sub>)  $\delta$  = 145.9, 135.6, 134.3, 129.6, 129.2, 128.0, 118.3, 114.1, 65.8, 16.7; HRMS (ESI) calcd for C<sub>27</sub>H<sub>27</sub>DNOSi [M+H<sup>+</sup>]: 411.1997, found: 411.2002.

## 2.5. Radical Trap Experiment

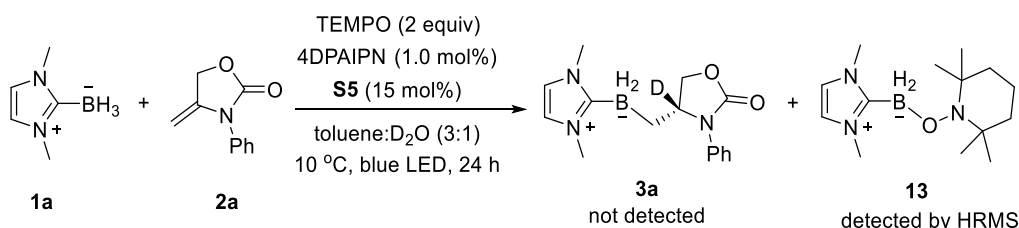

To an oven-dried 16 x 60 mm vial containing a dry Teflon stir bar were charged with photocatalyst 4DPAIPN (1.0 mg, 0.001 mmol), thiol catalyst **S5** (8.5 mg, 0.015 mmol) and NHC-BH<sub>3</sub> **1a** (21.8 mg, 0.2 mmol). After sequential addition of dry toluene (0.75 mL), D<sub>2</sub>O (0.25 mL), and olefin **2a** (17.5 mg, 0.1 mmol), the reaction mixture was flushed with nitrogen gas for two minutes and then the vial was sealed with a cap and parafilm. The vial was placed in a cooling station and a 30 W blue LED was then placed on the top of the cooling station, which is connected to a chiller to maintain the temperature of the cooling water at 10 °C (**Supplementary Figure 5**). After stirring with irradiation for 24 hours, a small portion of the reaction mixture was diluted with MeCN and filtered. The filtrate was subjected to high resolution mass spectra (HRMS) analysis. Product **3a** was not detected, instead **13** was observed: HRMS (ESI) calculated for **13** C<sub>14</sub>H<sub>29</sub>BN<sub>3</sub>O [M+H<sup>+</sup>]: 266.2398, found: 266.2402 (**Supplementary Figure 6**).

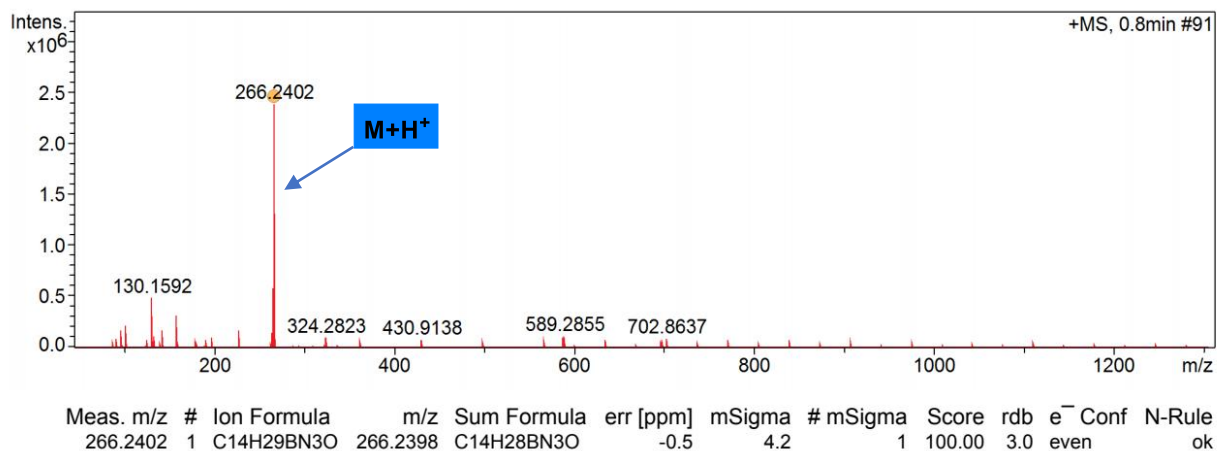

**Supplementary Figure 6.** The HRMS spectrum of the crude reaction mixture.

## 2.6. UV-Vis Absorption Spectra of 1a, 2a, and S5

UV-Vis absorption spectra of **1a**, **2a**, **S5** and their combinations were measured (in toluene, **Supplementary Figure 7-10**). None of the individual reaction components can absorb in the visible region and none of combinations showed obvious bathochromic shift, excluding the possibility of forming EDA complex under the reaction conditions.

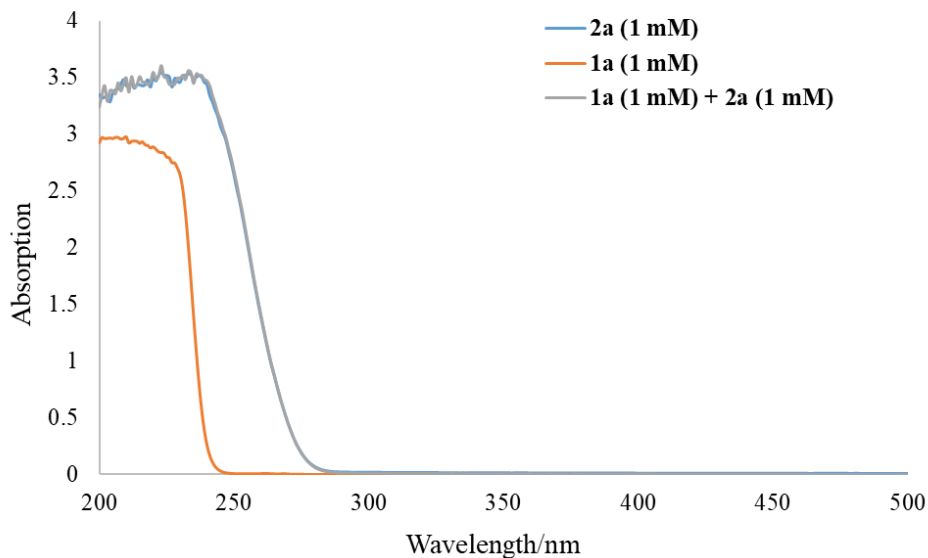

**Supplementary Figure 7.** UV-Vis spectra of **1a**, **2a**, and their mixture.

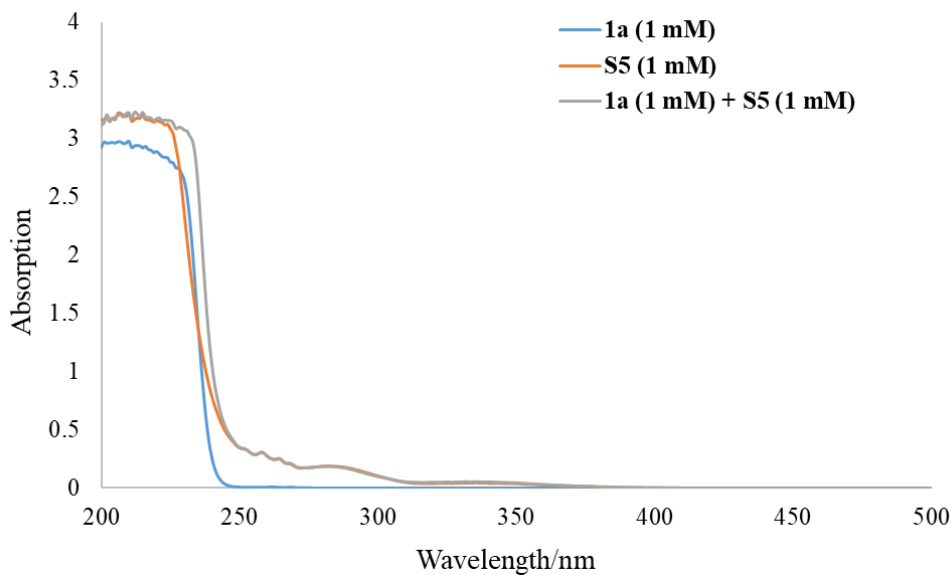

**Supplementary Figure 8.** UV-Vis spectra of **1a**, **S5**, and their mixture.

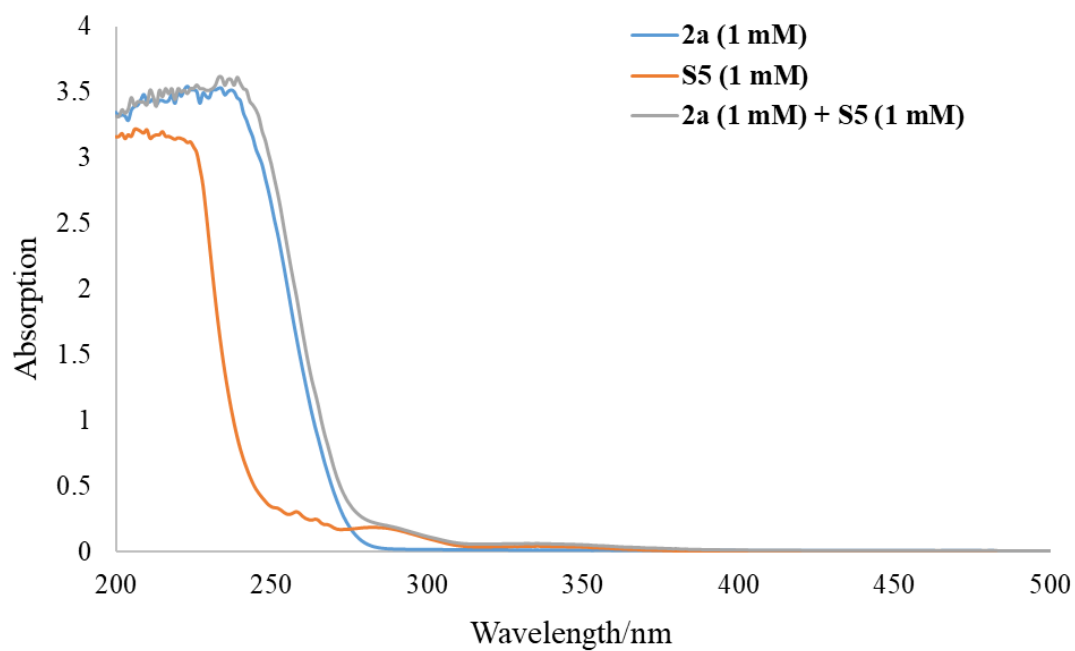

**Supplementary Figure 9.** UV-Vis spectra of **2a**, **S5**, and their mixture.

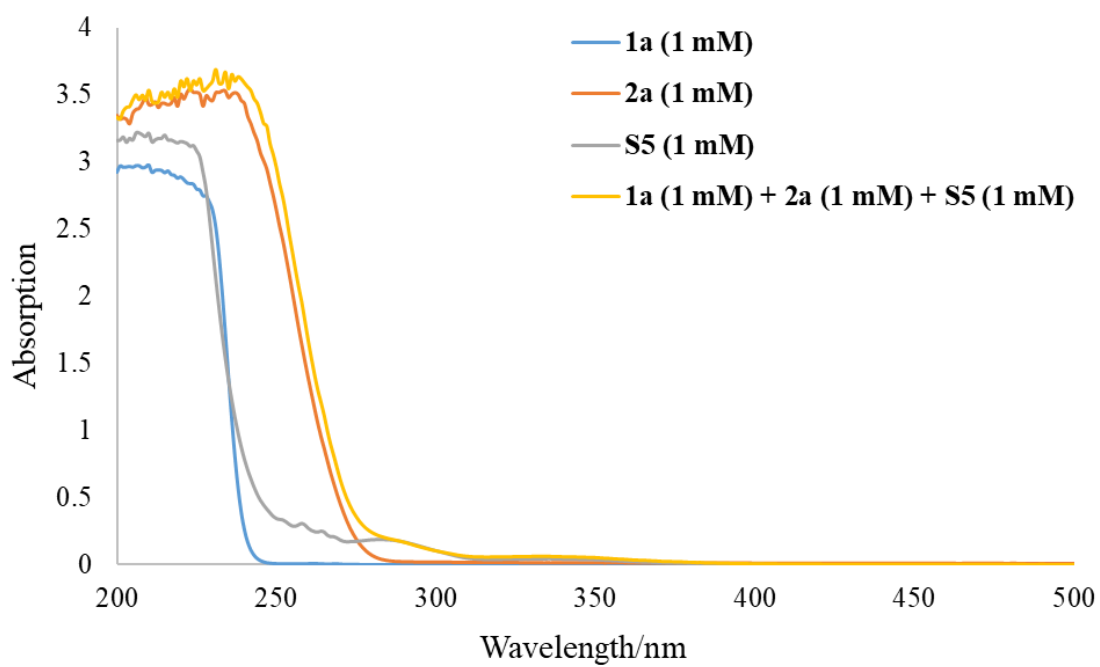

**Supplementary Figure 10.** UV-Vis spectra of **1a**, **2a**, **S5**, and their mixture.

## 2.7. Cyclic Voltammetry Measurements

Cyclic voltammetry (CV) experiments of **2a**, **S5**, and 4DPAIPN were recorded on a CHI 600E electrochemical workstation. Electrolyte solution was prepared by dissolving the substrates (0.05 mmol, 5 mM) and tetrabutylammonium hexafluorophosphate (387.4 mg, 1 mmol, 100 mM) in MeCN (10 mL) and bubbling with nitrogen for two minutes. Measurements were performed in a 3-compartment electrochemical cell, in which glassy carbon electrode (GCE) was used as a working electrode, silver-silver chloride (Ag/AgCl) in saturated KCl as the reference electrode, and Pt wire as the counter electrode. The scan rate was set at 100 mV/s.

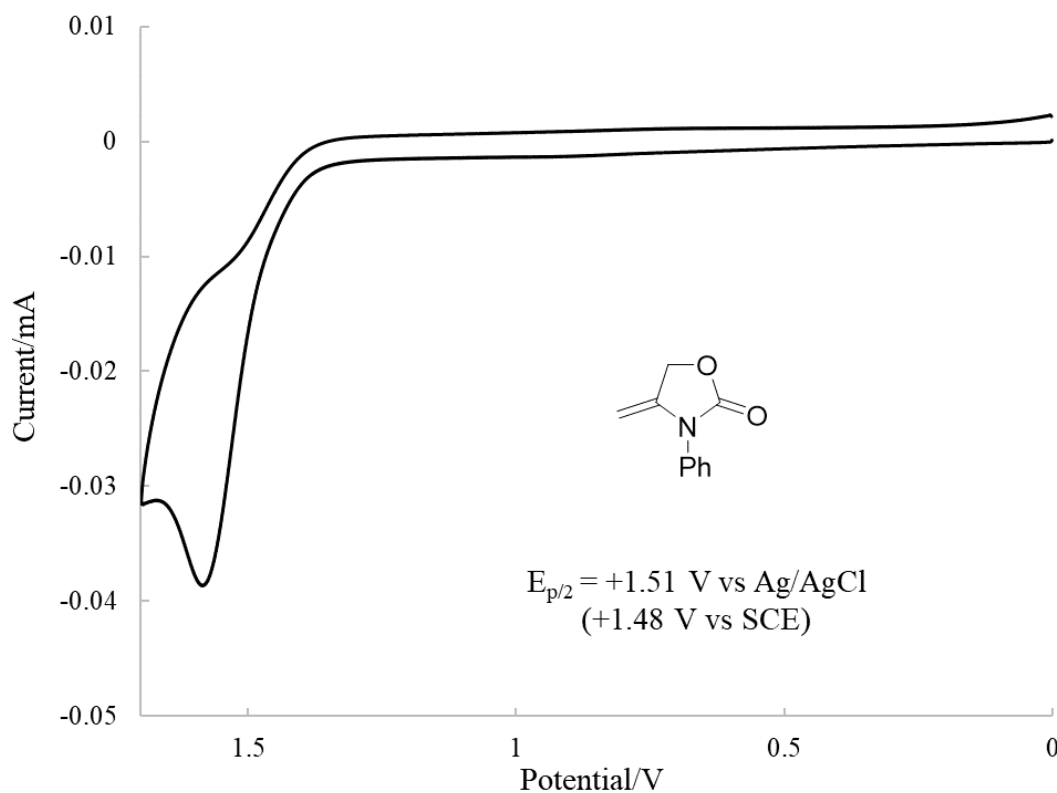

Supplementary Figure 11. CV curve of **2a**.

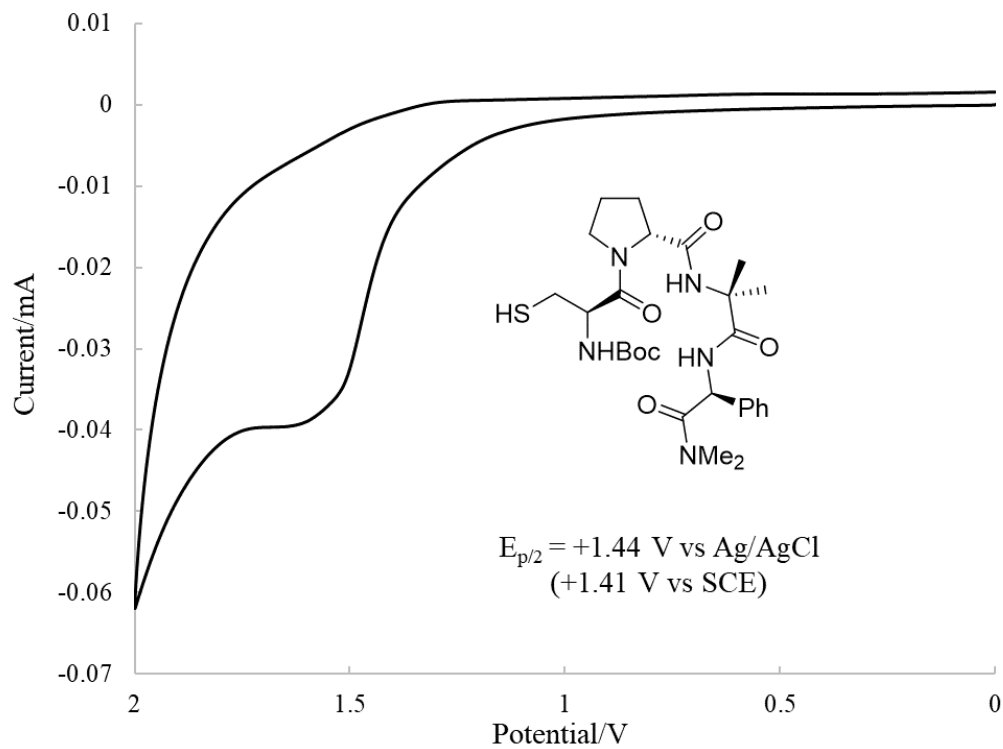

**Supplementary Figure 12.** CV curve of **S5**.

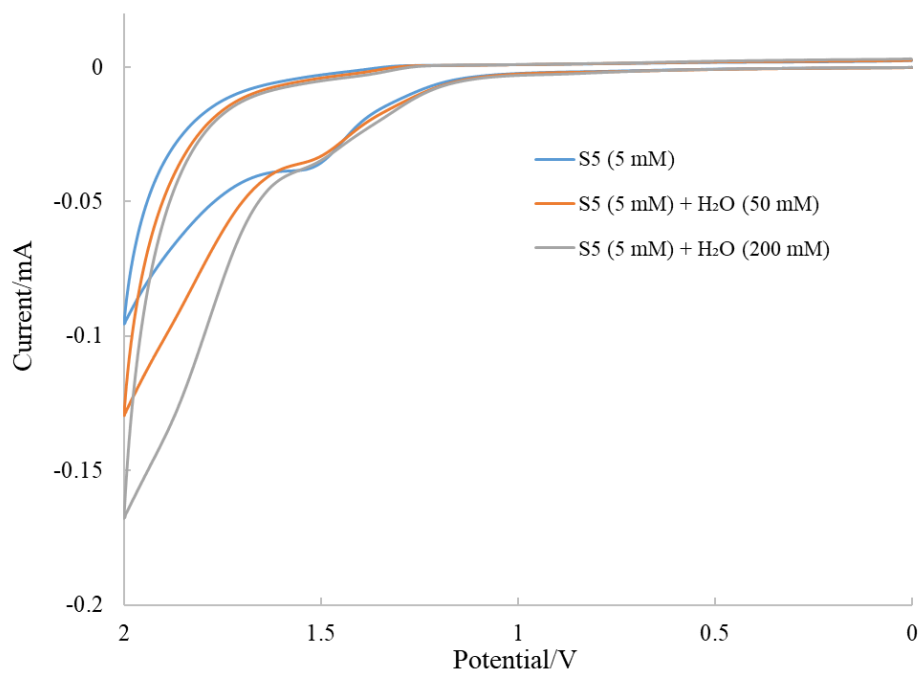

**Supplementary Figure 13.** CV curve of **S5** in the presence of H<sub>2</sub>O.

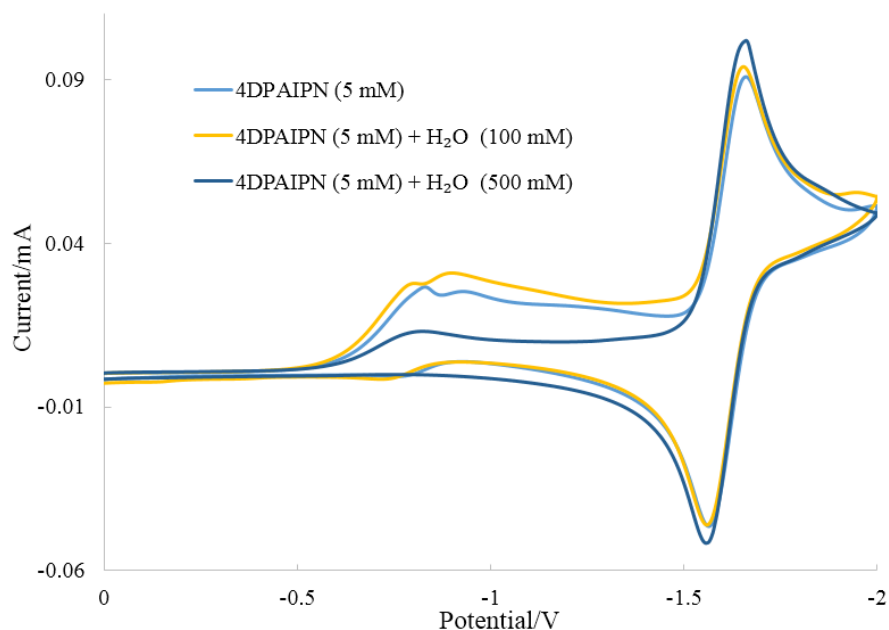

**Supplementary Figure 14.** CV curve of 4DPAIPN in the presence of H<sub>2</sub>O.

## 2.8. Stern-Volmer Experiments

Stern-Volmer luminescence quenching experiments were carried out with freshly prepared solutions of 4DPAIPN ( $10^{-5}$  M) at room temperature. For **1a** and **2a**, the solutions were prepared in toluene and was irradiated at 350 nm and the luminescence were measured at 523 nm. For **S5**, the solution was prepared in DMF due to its poor solubility in toluene and was irradiated at 350 nm and the luminescence were measured at 530 nm. For each sample, the luminescence was acquired three times and averaged (**Supplementary Tables 3-6**), the averages of the results were used for the graphical representation (**Supplementary Figures 15-18**).



**Supplementary Table 3.** Fluorescence quenching data with solutions of 4DPAIPN and **1a**.

| Species   |  | Concentration (mM) |  |  |  |
|-----------|--|--------------------|--|--|--|
| 4DPAIPN   |  | 0.01               |  |  |  |
| <b>1a</b> |  | varied             |  |  |  |

  

| [Sub] (mM) | Scan 1 | Scan 2 | Scan 3 | Average | I <sub>0</sub> /I |
|------------|--------|--------|--------|---------|-------------------|
| 0          | 1352   | 1351   | 1351   | 1351    | 1.000             |
| 5          | 1341   | 1342   | 1342   | 1342    | 1.007             |
| 10         | 1353   | 1353   | 1355   | 1354    | 0.998             |
| 15         | 1370   | 1371   | 1370   | 1370    | 0.986             |
| 20         | 1394   | 1393   | 1394   | 1394    | 0.969             |
| 25         | 1368   | 1368   | 1367   | 1368    | 0.988             |

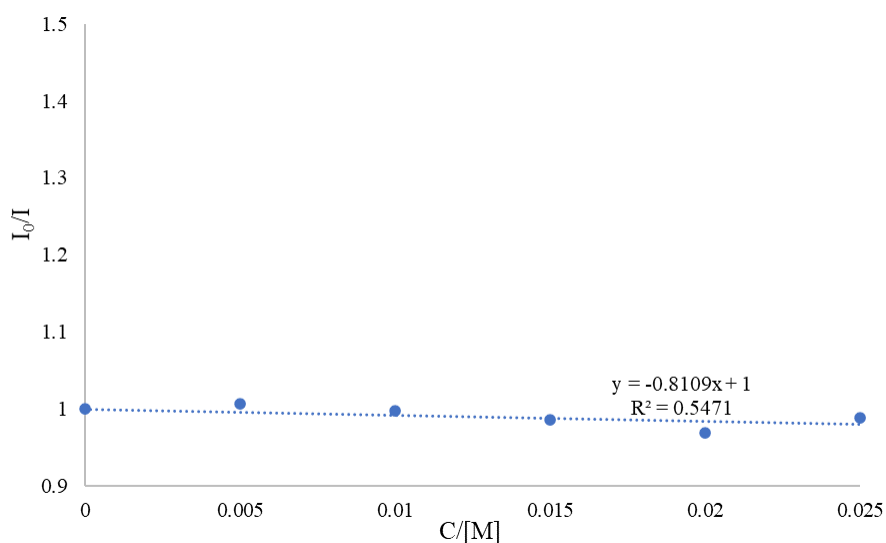

**Supplementary Figure 15.** Stern-Volmer plot of 4DPAIPN quenching with varying concentration of **1a**.

**Supplementary Table 4.** Fluorescence quenching data with solutions of 4DPAIPN and **2a**.

| Species   |  | Concentration (mM) |  |  |  |
|-----------|--|--------------------|--|--|--|
| 4DPAIPN   |  | 0.01               |  |  |  |
| <b>2a</b> |  | varied             |  |  |  |

  

| [Sub] (mM) | Scan 1 | Scan 2 | Scan 3 | Average | $I_0/I$ |
|------------|--------|--------|--------|---------|---------|
| 0          | 1266   | 1266   | 1267   | 1266    | 1.000   |
| 5          | 1259   | 1258   | 1256   | 1258    | 1.006   |
| 10         | 1261   | 1251   | 1237   | 1250    | 1.013   |
| 15         | 1216   | 1212   | 1207   | 1212    | 1.045   |
| 20         | 1221   | 1220   | 1219   | 1220    | 1.038   |
| 25         | 1195   | 1196   | 1196   | 1196    | 1.059   |

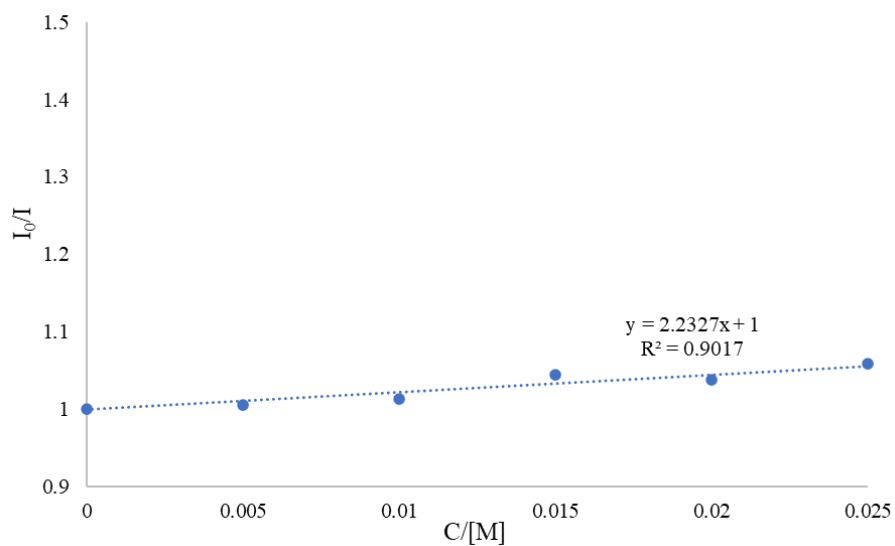

**Supplementary Figure 16.** Stern-Volmer plot of 4DPAIPN quenching with varying concentration of **2a**.

**Supplementary Table 5.** Fluorescence quenching data with solutions of 4DPAIPN and S5.

| Species |  | Concentration (mM) |  |  |  |
|---------|--|--------------------|--|--|--|
| 4DPAIPN |  | 0.01               |  |  |  |
| S5      |  | varied             |  |  |  |

  

| [Sub] (mM) | Scan 1 | Scan 2 | Scan 3 | Average | I <sub>0</sub> /I |
|------------|--------|--------|--------|---------|-------------------|
| 0          | 1020   | 1021   | 1021   | 1021    | 1.000             |
| 5          | 946    | 943    | 948    | 946     | 1.079             |
| 10         | 874    | 874    | 874    | 874     | 1.168             |
| 15         | 818    | 819    | 818    | 818     | 1.248             |
| 20         | 764    | 766    | 767    | 766     | 1.333             |
| 25         | 723    | 723    | 723    | 723     | 1.412             |

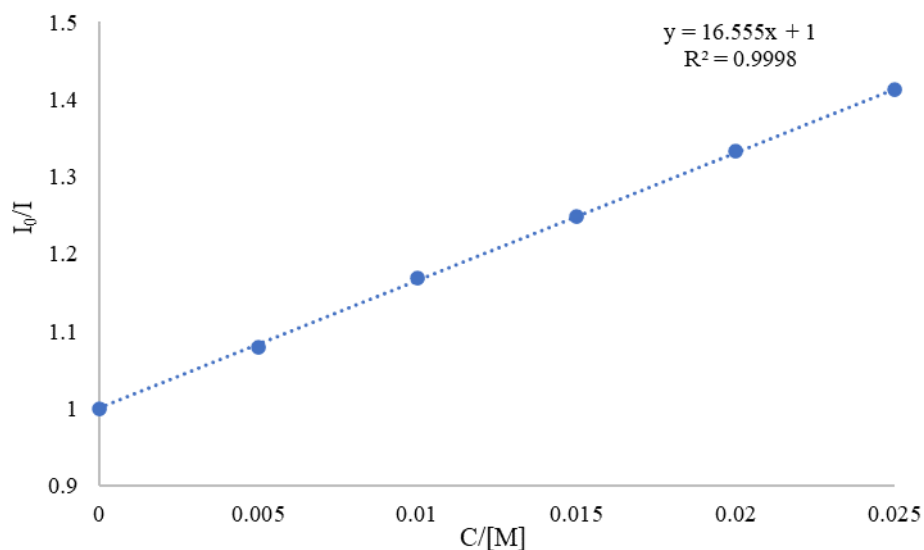

**Supplementary Figure 17.** Stern-Volmer plot of 4DPAIPN quenching with varying concentration of S5.

**Supplementary Table 6.** Fluorescence quenching data with solutions of 4DPAIPN, and **S5** in the presence of D<sub>2</sub>O (5.0 M).

| Species          |  | Concentration (mM) |  |  |  |
|------------------|--|--------------------|--|--|--|
| 4DPAIPN          |  | 0.01               |  |  |  |
| D <sub>2</sub> O |  | 5000               |  |  |  |
| <b>S5</b>        |  | varied             |  |  |  |

  

| [Sub] (mM) | Scan 1 | Scan 2 | Scan 3 | Average | I <sub>0</sub> /I |
|------------|--------|--------|--------|---------|-------------------|
| 0          | 1153   | 1156   | 1157   | 1155    | 1.000             |
| 1          | 1035   | 1033   | 1035   | 1034    | 1.117             |
| 2          | 969    | 969    | 969    | 969     | 1.192             |
| 3          | 913    | 913    | 914    | 913     | 1.265             |
| 4          | 868    | 868    | 868    | 868     | 1.331             |
| 5          | 843    | 843    | 843    | 843     | 1.370             |

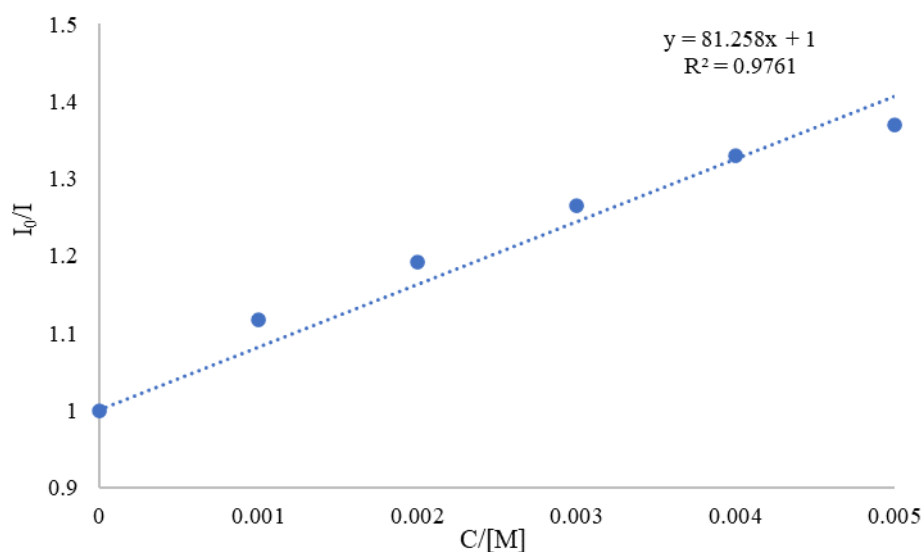

**Supplementary Figure 18.** Stern-Volmer plot of 4DPAIPN quenching with varying concentration of **S5** in the presence of D<sub>2</sub>O (5.0 M).

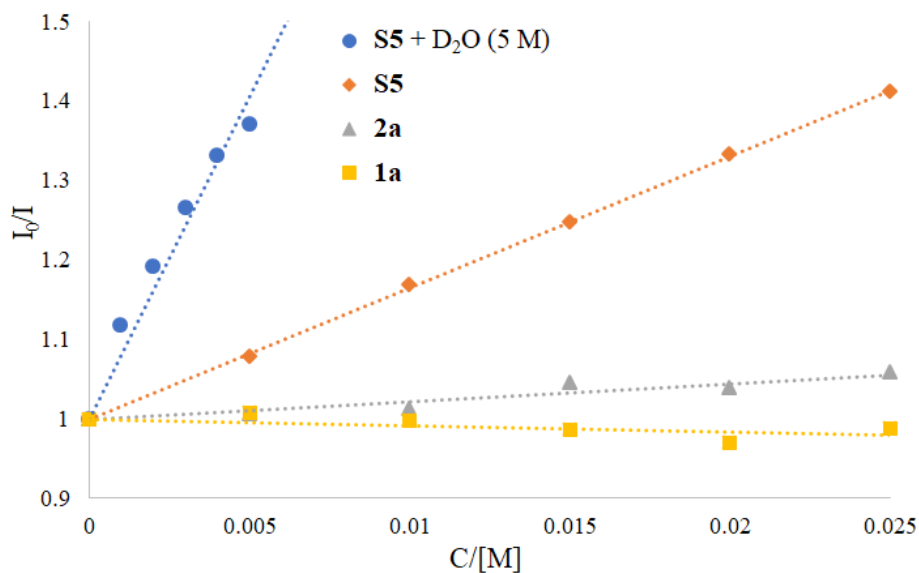

**Supplementary Figure 19.** Summary of Stern-Volmer plots.

**Supplementary Table 7.** The influence of D<sub>2</sub>O on reaction rate.

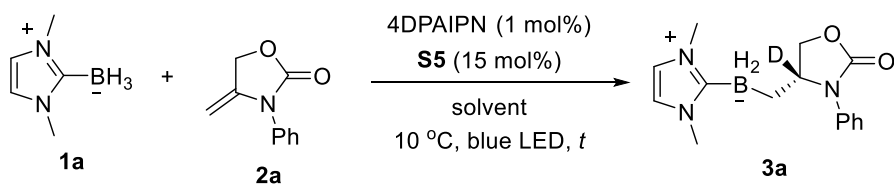

| <i>t</i> | NMR yield of <b>3a</b>         |         |
|----------|--------------------------------|---------|
|          | toluene:D <sub>2</sub> O (3:1) | toluene |
| 2 h      | 16%                            | n.d.    |
| 4 h      | 26%                            | 10%     |
| 8 h      | n.d.                           | 22%     |

n.d. : Not Determined

We briefly investigated the initial product formation rates for reactions with or without D<sub>2</sub>O and found that the reaction with D<sub>2</sub>O was much faster than the reaction without D<sub>2</sub>O as shown above.

## 2.9. Quantum Yield Measurements

### 2.9.1. Emission spectrum of light source

Emission spectrum of the blue LED (30 W) was recorded on a Steady-State & Time-Resolved Fluorescence Spectrofluorometer (**Supplementary Figure 20**). According to the spectrum, emission range of light source is 400–500 nm, and the maximum emission wavelength is 441 nm.

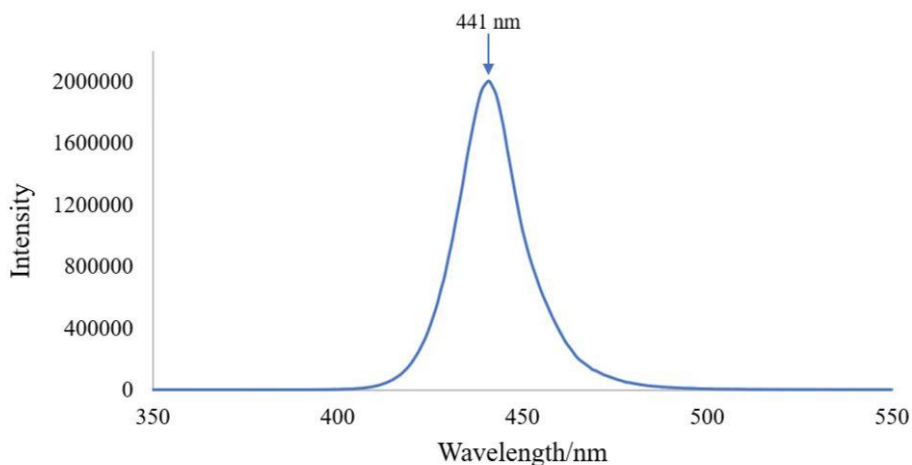

**Supplementary Figure 20.** Emission spectrum of the blue LED.

Quantum yield measurements were determined using standard ferrioxalate chemical actinometry as described by Yoon,<sup>18</sup> Ritter,<sup>19</sup> Alemán,<sup>20</sup> and Glorius.<sup>21</sup> In this part, we used a 30 W blue LED ( $\lambda = 441$  nm) as light source to determine the quantum yield.

### 2.9.2. Determination of the photon flux at $\lambda = 441$ nm:

The photon flux of the 30 W blue LED was determined by monitoring the photoreduction of Fe(III) in potassium ferrioxalate to Fe(II), upon complexation with 1,10-phenanthroline:

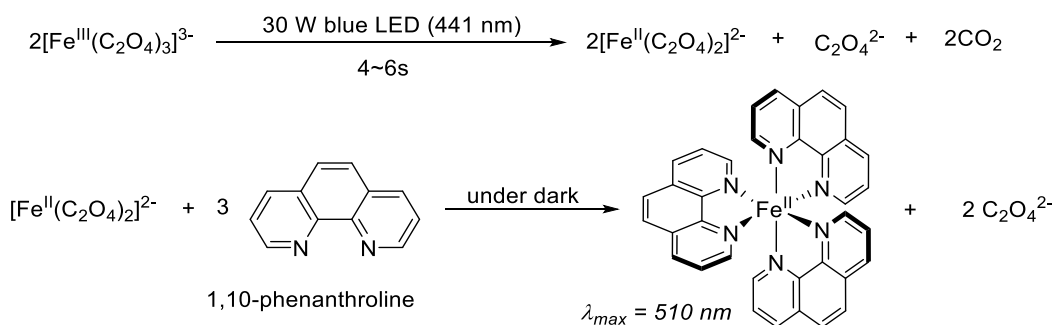

The following solutions were prepared:

a. Actinometer solution: 589.5 mg (1.2 mmol) of potassium ferrioxalate trihydrate and 278  $\mu\text{L}$  of  $\text{H}_2\text{SO}_4$  96% were added to a 100 mL volumetric flask and filled to the mark with Nanopure water.

b. Phenanthroline-buffer solution: 100 mg (0.55 mmol) of 1, 1,10-phenanthroline, 9.88 g (120.4 mmol) of sodium acetate and 2.0 mL of  $\text{H}_2\text{SO}_4$  96% were added to a 100 mL volumetric flask and filled to the mark with Nanopure water.

1 mL of the actinometer solution was added to a vial (16  $\times$  60 mm) and was irradiated by the 30 W blue LED for 4 seconds. After the irradiation, the mixture was quantitatively transferred to a 5 mL volumetric flask containing 1.0 mL of the phenanthroline-buffer solution. Then, the flask was filled to the mark with Nanopure water, wrapped up with aluminum foil, and was left in the dark for 1 h to ensure the quantitative formation of  $\text{Fe}^{\text{II}}(\text{phen})_3^{2+}$  complex. This procedure was repeated one more time by changing the irradiation time to 6 seconds. Additionally, the experiment of a control sample was carried out under dark, following the same sample treatment.

The absorbance of each solution at  $\lambda = 510$  nm was measured using a Perkin-Elmer Lambda 35 UV-Vis spectrophotometer, establishing the blank with Nanopure water. For each sample, the absorbance was acquired three times and averaged. According to Lambert-Beer law, the moles of Fe(II) in each sample are related to the absorbance:

$$n [\text{Fe}^{2+}] = \frac{V \cdot \Delta A}{l \cdot \varepsilon}$$

Where:

- $\Delta A$  is the absorbance difference between irradiated sample and non-irradiated sample.
- $V$  is the volume (in L) of the measurement sample (5 mL).
- $\varepsilon$  is the extinction coefficient of the complex  $\text{Fe}^{\text{II}}(\text{phen})_3^{2+}$  at  $\lambda = 510$  nm (11100  $\text{L mol}^{-1} \text{cm}^{-1}$ )
- $l$  is the optical path of the sample in the spectrophotometer (1 cm).

The photon flux can be calculated using the following equation:

$$photon\ flux = \frac{n [Fe^{2+}]}{\Phi \cdot t \cdot f}$$

Where:

- $\Phi$  is the quantum yield for the photoreduction of ferrioxalate at  $\lambda = 441$  nm, which is 1.11.<sup>22,23</sup>
- $t$  is the reaction time (4 s or 6 s).
- $f$  is the fraction of light absorbed, and is calculated as  $f = 1 - 10^{-A_{441\text{ nm}}}$

where  $A_{441\text{ nm}}$  is the absorbance of the actinometer solution at  $\lambda = 441$  nm, which is 0.3877 according to the UV-Vis spectra of actinometer solution (**Supplementary Figure 21**).

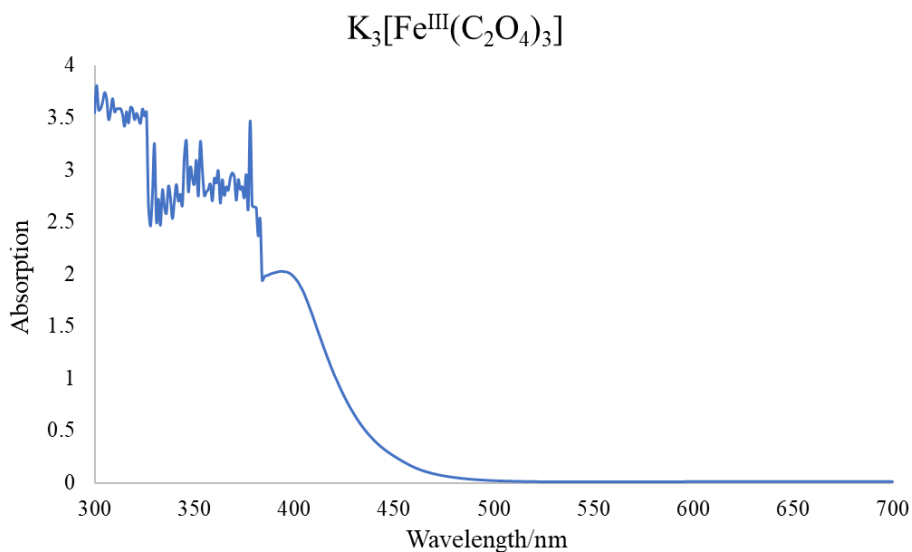

**Supplementary Figure 21.** UV-Vis spectra of actinometer solution (12 mM in aqueous solution).



The photon flux of the 30 W blue LED ( $\lambda = 441 \text{ nm}$ ) was thus determined to be  $2.65 \cdot 10^{-7}$  einstein  $\text{s}^{-1}$  (**Supplementary Table 8**).

**Supplementary Table 8.** UV-Vis absorption data and calculated results of photo flux.

| scan time                          | UV-Vis absorption at 510 nm     |                       |                   |
|------------------------------------|---------------------------------|-----------------------|-------------------|
|                                    | $A_{4s}$                        | $A_{6s}$              | $A_{\text{dark}}$ |
| 1                                  | 1.480                           | 2.195                 | 0.016             |
| 2                                  | 1.644                           | 2.452                 | 0.019             |
| Average                            | 1.562                           | 2.324                 | 0.017             |
| $\Delta A (=A - A_{\text{dark}})$  | 1.545                           | 2.306                 | -                 |
| $n [\text{Fe}^{2+}] \text{ (mol)}$ | $6.96 \cdot 10^{-7}$            | $1.04 \cdot 10^{-6}$  |                   |
| Photon flux<br>(einstein/s)        | $2.654 \cdot 10^{-7}$           | $2.642 \cdot 10^{-7}$ |                   |
|                                    | (average) $2.648 \cdot 10^{-7}$ |                       |                   |

### 2.9.3. Determination of quantum yield at $\lambda = 441 \text{ nm}$ :

Once we have determined the photon flux of the 30 W blue LED ( $\lambda = 441 \text{ nm}$ ), the same equation was employed for the determination of the quantum yield of our photoreaction system. For that, the moles of product for a given time was determined.

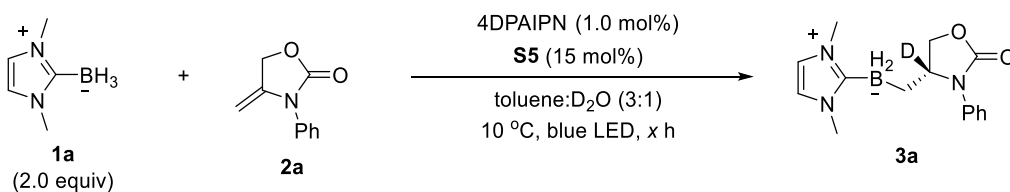

Following the **Typical Procedure I**, the reaction of **1a** and **2a** was carried out under the standard conditions and was stopped after 2 h of irradiation. The solvent of reaction mixture was

evaporated in vacuo. The amount of product **3a** was determined to be  $1.6 \cdot 10^{-5}$  mol by  $^1\text{H}$  NMR analysis of the crude reaction mixture using  $\text{CH}_2\text{Br}_2$  as the internal standard. Another reaction with an irradiation time of 4 h was also carried out and the amount of **3a** was determined to be  $2.6 \cdot 10^{-5}$  mol.

$$\Phi' = \frac{n [\text{prod.}]}{\text{photon flux} \cdot t' \cdot f'}$$

Where:

- $n$  [prod.] is the amount of **3a** (in mol) that has been formed during the irradiation time.
- $t'$  (s) is the irradiation time (in seconds).
- $f'$  is the fraction of light absorbed, and is calculated as  $f' = 1 - 10^{-A_{441 \text{ nm}}}$

where  $A_{441 \text{ nm}}$  is the absorbance of PC solution at 441 nm, and was determined to be 2.5939 according to the UV-Vis spectra of 1 mM solution of 4DPAIPN in toluene (**Supplementary Figure 22**).

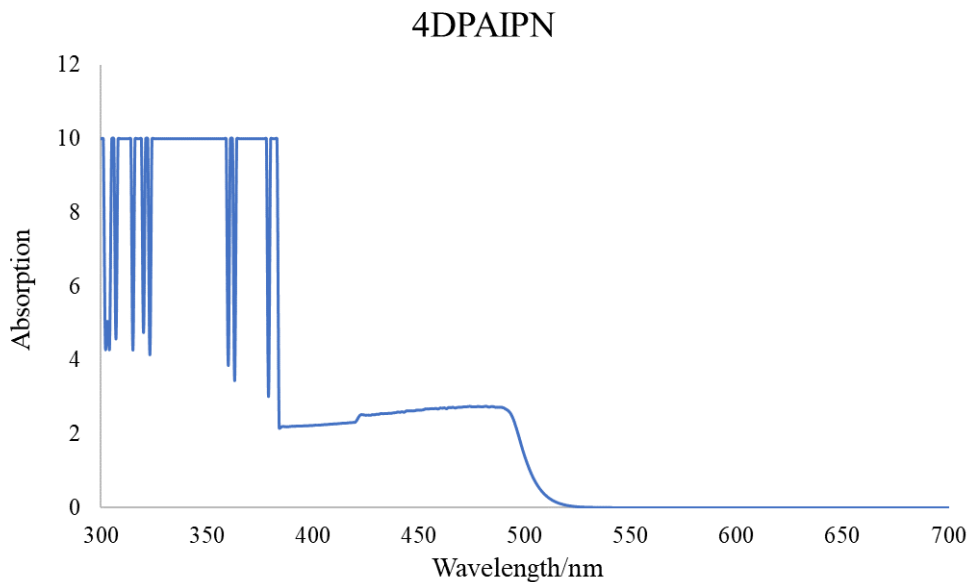

**Supplementary Figure 22.** UV-Vis spectra of 4DPAIPN solution (1 mM in toluene)

The quantum yield of the reaction was thus determined to be 0.0076 (average of two runs, **Supplementary Table 9**).

**Supplementary Table 9.** Quantum yield in the presence of D<sub>2</sub>O.

| entry | reaction time/s | NMR yield/% | n[prod.]/mol        | quantum yield ( $\Phi'$ ) |
|-------|-----------------|-------------|---------------------|---------------------------|
| 1     | 7200            | 16          | $1.6 \cdot 10^{-5}$ | 0.0084                    |
| 2     | 14400           | 26          | $2.6 \cdot 10^{-5}$ | 0.0068                    |

$$\Phi' = (0.0084 + 0.0068) / 2 = 0.76\%$$

We also measured the quantum yield of the reaction without D<sub>2</sub>O, which is homogenous but also gave a very low value ( $\Phi' = 0.28\%$ , see the **Supplementary Table 10** below), indicating that the low quantum yield is largely related to the slow reaction rate.

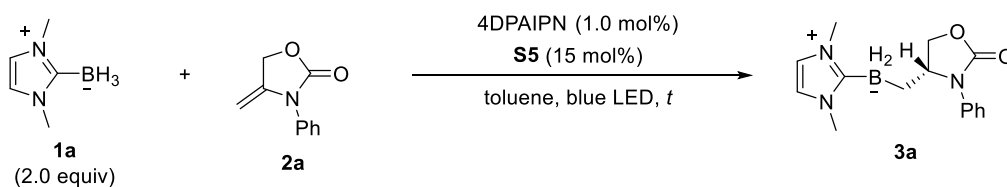

**Supplementary Table 10.** Quantum yield in the absence of D<sub>2</sub>O.

| entry | reaction time/s | NMR yield/% | n[prod.]/mol        | quantum yield ( $\Phi'$ ) |
|-------|-----------------|-------------|---------------------|---------------------------|
| 1     | 14400           | 10          | $1.0 \cdot 10^{-5}$ | 0.0026                    |
| 2     | 28800           | 22          | $2.2 \cdot 10^{-5}$ | 0.0029                    |

$$\Phi' = (0.0026 + 0.0029) / 2 = 0.28\%$$

## 2.10. X-Ray Crystallographic Data of Compounds 3c, 4a, and 5a

### 2.10.1. X-Ray Crystallographic Data of Compound 3c

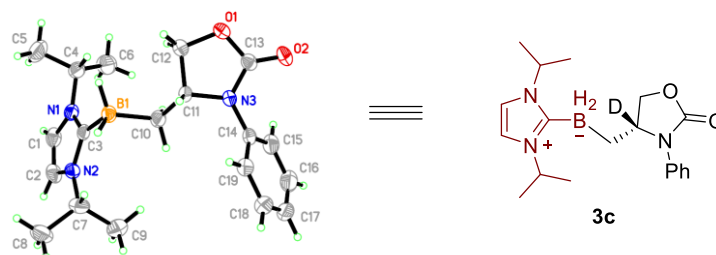

**Supplementary Figure 23.** X-Ray Structure of Compound **3c** (CCDC 2143290). Crystals suitable for X-ray structure analysis were obtained via recrystallization from tetrahydrofuran and pentane.

**Supplementary Table 11.** Crystal data and structure refinement for **3c**.

|                                 |                                                                                                                        |
|---------------------------------|------------------------------------------------------------------------------------------------------------------------|
| Identification code             | <b>3c</b>                                                                                                              |
| Empirical formula               | C <sub>19</sub> H <sub>28</sub> BN <sub>3</sub> O <sub>2</sub>                                                         |
| Formula weight                  | 341.25                                                                                                                 |
| Temperature                     | 173(2) K                                                                                                               |
| Wavelength                      | 1.54178 Å                                                                                                              |
| Crystal system, space group     | Monoclinic, P2(1)                                                                                                      |
| Unit cell dimensions            | a = 5.8190(2) Å    alpha = 90 deg.<br>b = 15.2860(4) Å    beta = 94.197(2) deg.<br>c = 21.4445(5) Å    gamma = 90 deg. |
| Volume                          | 1902.36(9) Å <sup>3</sup>                                                                                              |
| Z, Calculated density           | 4, 1.191 Mg/m <sup>3</sup>                                                                                             |
| Absorption coefficient          | 0.609 mm <sup>-1</sup>                                                                                                 |
| F(000)                          | 736                                                                                                                    |
| Crystal size                    | 0.180 x 0.160 x 0.140 mm                                                                                               |
| Theta range for data collection | 3.554 to 68.137 deg.                                                                                                   |
| Limiting indices                | -6<=h<=6, -18<=k<=18, -25<=l<=25                                                                                       |
| Reflections collected / unique  | 26076 / 6870 [R(int) = 0.0539]                                                                                         |
| Completeness to theta = 67.679  | 99.9 %                                                                                                                 |
| Absorption correction           | Semi-empirical from equivalents                                                                                        |
| Refinement method               | Full-matrix least-squares on F <sup>2</sup>                                                                            |

|                                   |                                    |
|-----------------------------------|------------------------------------|
| Data / restraints / parameters    | 6870 / 1 / 471                     |
| Goodness-of-fit on F <sup>2</sup> | 1.049                              |
| Final R indices [I > 2σ(I)]       | R1 = 0.0423, wR2 = 0.1063          |
| R indices (all data)              | R1 = 0.0484, wR2 = 0.1098          |
| Absolute structure parameter      | -0.12(11)                          |
| Extinction coefficient            | n/a                                |
| Largest diff. peak and hole       | 0.193 and -0.188 e.Å <sup>-3</sup> |

### 2.10.2 X-Ray Crystallographic Data of Compound 4a

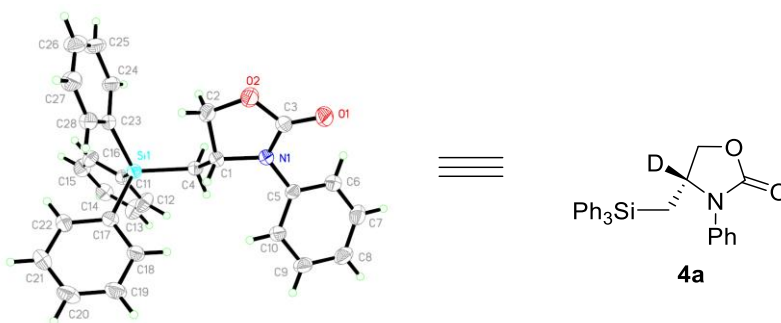

**Supplementary Figure 24.** X-Ray Structure of Compound **4a** (CCDC 2106905). Crystals suitable for X-ray structure analysis were obtained via recrystallization from tetrahydrofuran and pentane.

**Supplementary Table 12.** Crystal data and structure refinement for **4a**.

|                             |                                                                                                                |
|-----------------------------|----------------------------------------------------------------------------------------------------------------|
| Identification code         | <b>4a</b>                                                                                                      |
| Empirical formula           | C <sub>28</sub> H <sub>25</sub> NO <sub>2</sub> Si                                                             |
| Formula weight              | 435.58                                                                                                         |
| Temperature                 | 299(2) K                                                                                                       |
| Wavelength                  | 1.54178 Å                                                                                                      |
| Crystal system, space group | Trigonal, P3(2)                                                                                                |
| Unit cell dimensions        | a = 9.6154(4) Å    alpha = 90 deg.<br>b = 9.6154(4) Å    beta = 90 deg.<br>c = 44.006(3) Å    gamma = 120 deg. |
| Volume                      | 3523.5(4) Å <sup>3</sup>                                                                                       |

|                                   |                                             |
|-----------------------------------|---------------------------------------------|
| Z, Calculated density             | 6, 1.232 Mg/m <sup>3</sup>                  |
| Absorption coefficient            | 1.070 mm <sup>-1</sup>                      |
| F(000)                            | 1380                                        |
| Crystal size                      | 0.200 x 0.200 x 0.200 mm                    |
| Theta range for data collection   | 3.012 to 68.567 deg.                        |
| Limiting indices                  | -11 ≤ h ≤ 11, -10 ≤ k ≤ 11, -51 ≤ l ≤ 49    |
| Reflections collected / unique    | 29000 / 8470 [R(int) = 0.0795]              |
| Completeness to theta = 67.679    | 99.8 %                                      |
| Absorption correction             | Semi-empirical from equivalents             |
| Refinement method                 | Full-matrix least-squares on F <sup>2</sup> |
| Data / restraints / parameters    | 8470 / 3 / 577                              |
| Goodness-of-fit on F <sup>2</sup> | 1.011                                       |
| Final R indices [I > 2σ(I)]       | R1 = 0.0470, wR2 = 0.1279                   |
| R indices (all data)              | R1 = 0.0632, wR2 = 0.1376                   |
| Absolute structure parameter      | 0.031(16)                                   |
| Extinction coefficient            | n/a                                         |
| Largest diff. peak and hole       | 0.328 and -0.218 e. Å <sup>-3</sup>         |

### 2.10.3 X-Ray Crystallographic Data of Compound 5a

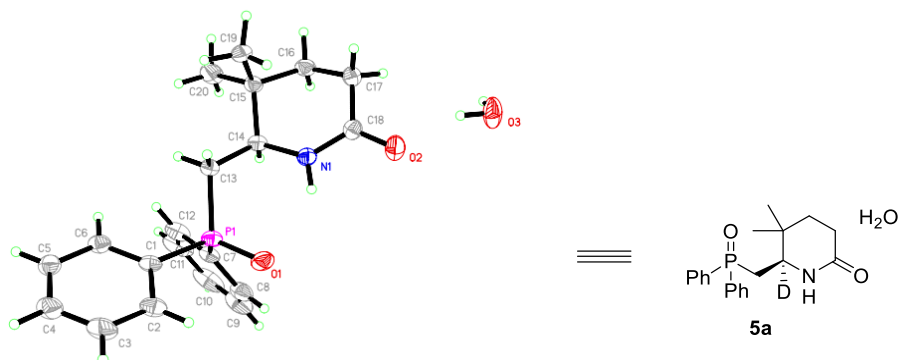

**Supplementary Figure 25.** X-Ray Structure of Compound **5a** (CCDC 2106903). Crystals suitable for X-ray structure analysis were obtained via recrystallization from methanol and pentane.

**Supplementary Table 13.** Crystal data and structure refinement for **5a**.

|                                   |                                                                                                                                  |
|-----------------------------------|----------------------------------------------------------------------------------------------------------------------------------|
| Identification code               | <b>5a</b>                                                                                                                        |
| Empirical formula                 | C <sub>20</sub> H <sub>26</sub> NO <sub>3</sub> P                                                                                |
| Formula weight                    | 359.39                                                                                                                           |
| Temperature                       | 295(2) K                                                                                                                         |
| Wavelength                        | 1.54178 Å                                                                                                                        |
| Crystal system, space group       | Hexagonal, P6(5)                                                                                                                 |
| Unit cell dimensions              | a = 10.174(2) Å    alpha = 90.00(3) deg.<br>b = 10.174(2) Å    beta = 90.00(3) deg.<br>c = 34.443(7) Å    gamma = 120.00(3) deg. |
| Volume                            | 3087.7(14) Å <sup>3</sup>                                                                                                        |
| Z, Calculated density             | 6, 1.160 Mg/m <sup>3</sup>                                                                                                       |
| Absorption coefficient            | 1.318 mm <sup>-1</sup>                                                                                                           |
| F(000)                            | 1152                                                                                                                             |
| Crystal size                      | 0.200 x 0.200 x 0.200 mm                                                                                                         |
| Theta range for data collection   | 5.019 to 68.322 deg.                                                                                                             |
| Limiting indices                  | -12<=h<=12, -11<=k<=12, -41<=l<=41                                                                                               |
| Reflections collected / unique    | 32039 / 3772 [R(int) = 0.0447]                                                                                                   |
| Completeness to theta = 67.679    | 99.9 %                                                                                                                           |
| Refinement method                 | Full-matrix least-squares on F <sup>2</sup>                                                                                      |
| Data / restraints / parameters    | 3772 / 1 / 240                                                                                                                   |
| Goodness-of-fit on F <sup>2</sup> | 1.028                                                                                                                            |
| Final R indices [I>2sigma(I)]     | R1 = 0.0329, wR2 = 0.0851                                                                                                        |
| R indices (all data)              | R1 = 0.0359, wR2 = 0.0884                                                                                                        |
| Absolute structure parameter      | 0.038(8)                                                                                                                         |
| Extinction coefficient            | n/a                                                                                                                              |
| Largest diff. peak and hole       | 0.128 and -0.119 e. Å <sup>-3</sup>                                                                                              |

## 2.11. Computational Details

### 2.11.1. General Information

DFT calculations were performed in Gaussian 16 (C.01) program package.<sup>24</sup> All the structures were optimized using the  $\omega$ B97xD functional<sup>25</sup> and the 6-31+G(d,p) basis set. Frequency calculations were carried out at that level of theory to analyze the nature of stationary points as transition states (one imaginary frequency) or minima (no imaginary frequencies). The Goodvibes program<sup>26</sup> was used to obtain the thermochemistry corrections at 283.15K, including quasi-harmonic corrections with the method proposed by Grimme,<sup>27</sup> with the cut-off value set as 100 wavenumbers. To further refine the potential energies, single point energy calculations were done with a larger basis set (6-311++G(3d,2p)) and PBE0<sup>28</sup> as the functional. Benchmarking calculations using M06-2X and  $\omega$ B97xD were also done to further confirm the robustness of the method, showing similar performance for this reaction. The  $\omega$ B97xD functional was selected for optimizations due to its general good performance in geometry optimization.<sup>29</sup> Implicit solvation was included in all the calculations, including geometry optimization-frequency calculations and single points, using the CPCM implicit solvent model<sup>30,31</sup> and toluene as the solvent.

Conformation of the peptide catalyst was chosen based on the structural analysis of similar tetrapeptide catalysts by X-ray and DFT calculations reported by Miller and co-workers.<sup>32</sup> Thiol **S6**, which showed the same enantioselectivity as thiol **S5**, was thus chosen as the catalyst for our calculation.

NCI analyses were performed using the NCIPLOT program<sup>33,34</sup> and all the 3D representations were prepared in PyMOL.



### 2.11.2. Benchmarking of the computational method

**Supplementary Table 14.** Comparison of different DFT methods on the **TS-*Re*** vs **TS-*Si*** activation energy difference and calculated enantiomeric ratio. All energies in kcal/mol.

| Method         | $\Delta\Delta G_{\text{Re-Si}}^{\ddagger}$ | er    |
|----------------|--------------------------------------------|-------|
| PBE0           | 1.24                                       | 90:10 |
| M062X          | 2.15                                       | 98:2  |
| $\omega$ B97xD | 2.14                                       | 98:2  |
| Exp.           | 1.45                                       | 93:7  |

## 2.12 NMR Spectra and HPLC Spectra

$^1\text{H}$  NMR (400 MHz, room temperature,  $\text{CDCl}_3$ )

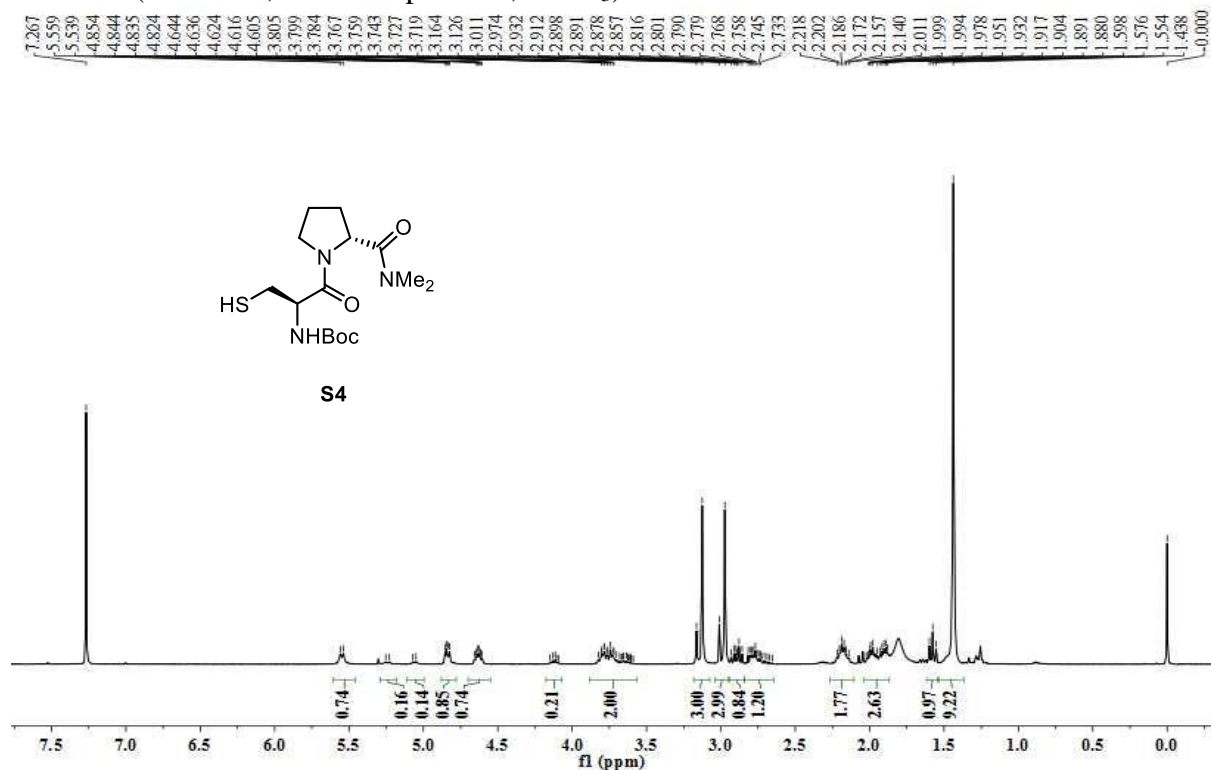

Supplementary Figure 26.  $^1\text{H}$  NMR spectrum of compound S4

$^{13}\text{C}$  NMR (100 MHz, room temperature,  $\text{CDCl}_3$ )

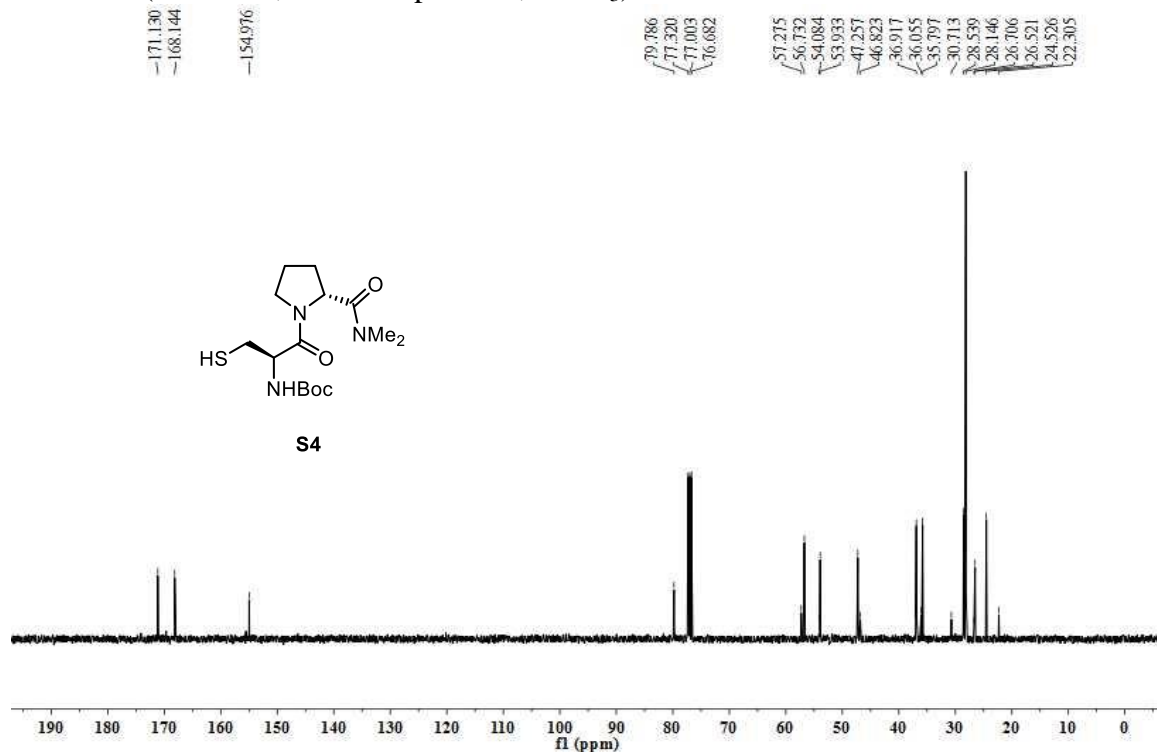

Supplementary Figure 27.  $^{13}\text{C}$  NMR spectrum of compound S4

$^1\text{H}$  NMR (400 MHz, room temperature,  $\text{CDCl}_3$ )

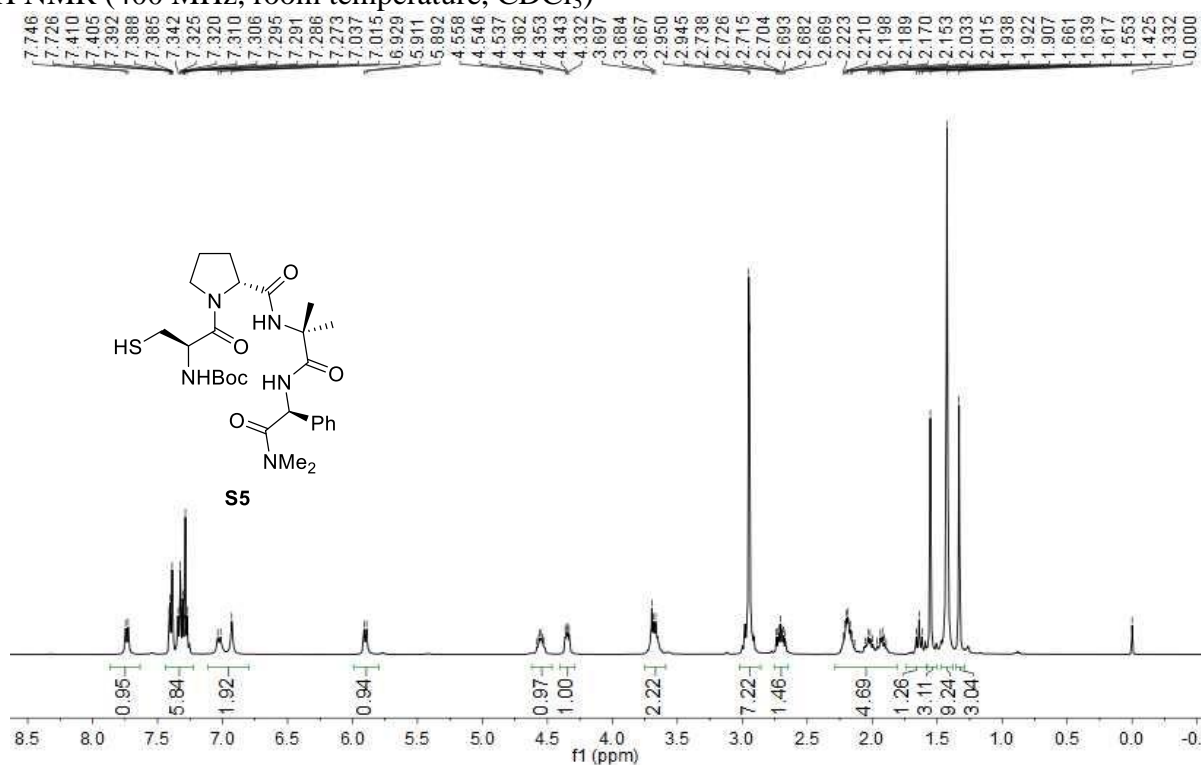

Supplementary Figure 28.  $^1\text{H}$  NMR spectrum of compound S5

$^{13}\text{C}$  NMR (100 MHz, room temperature,  $\text{CDCl}_3$ )

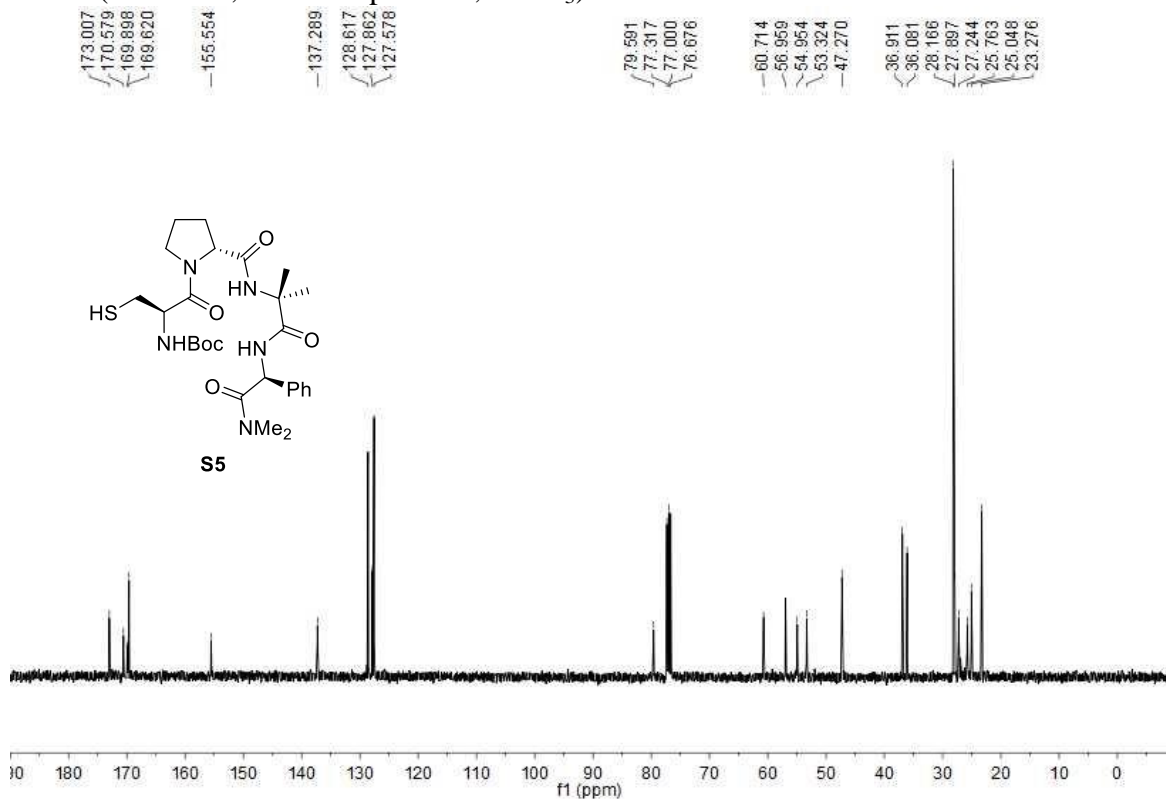

Supplementary Figure 29.  $^{13}\text{C}$  NMR spectrum of compound S5



<sup>1</sup>H NMR (400 MHz, room temperature, CDCl<sub>3</sub>)

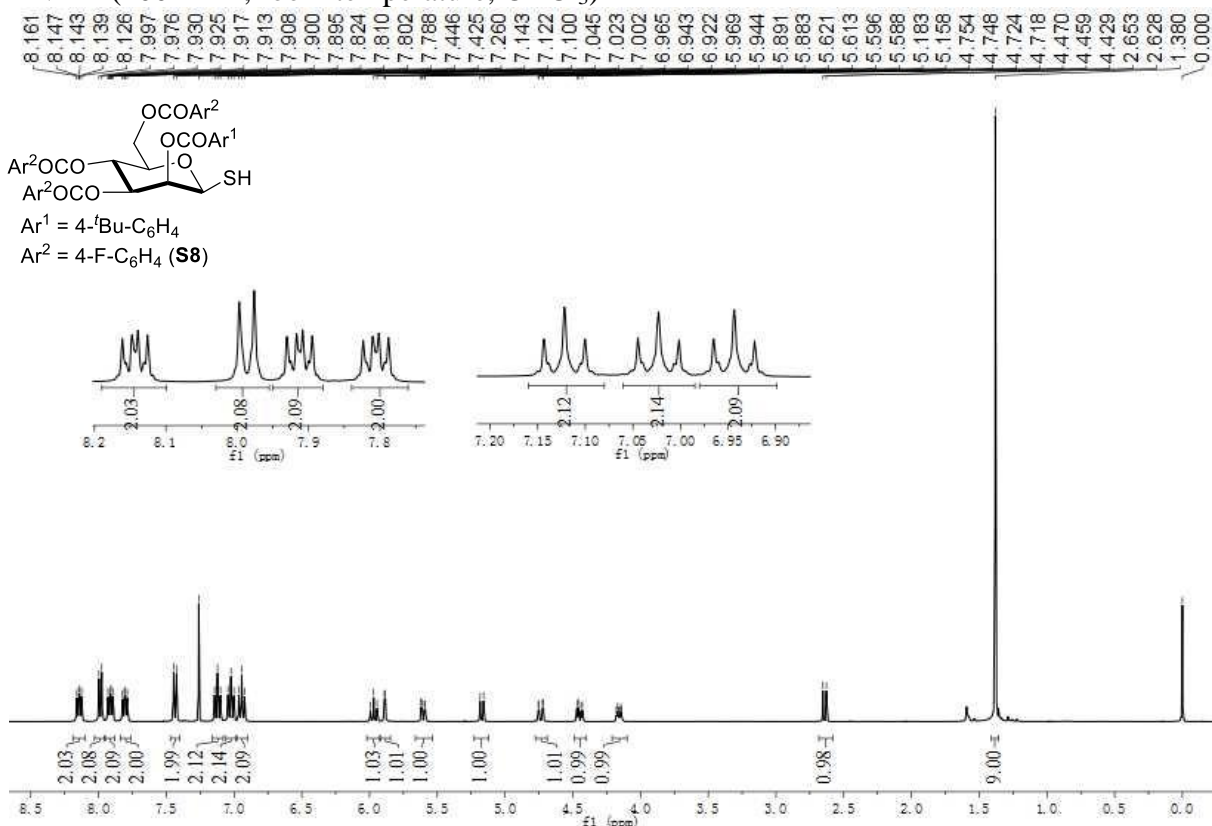

Supplementary Figure 32. <sup>1</sup>H NMR spectrum of compound **S8**

<sup>13</sup>C NMR (100 MHz, room temperature, CDCl<sub>3</sub>)

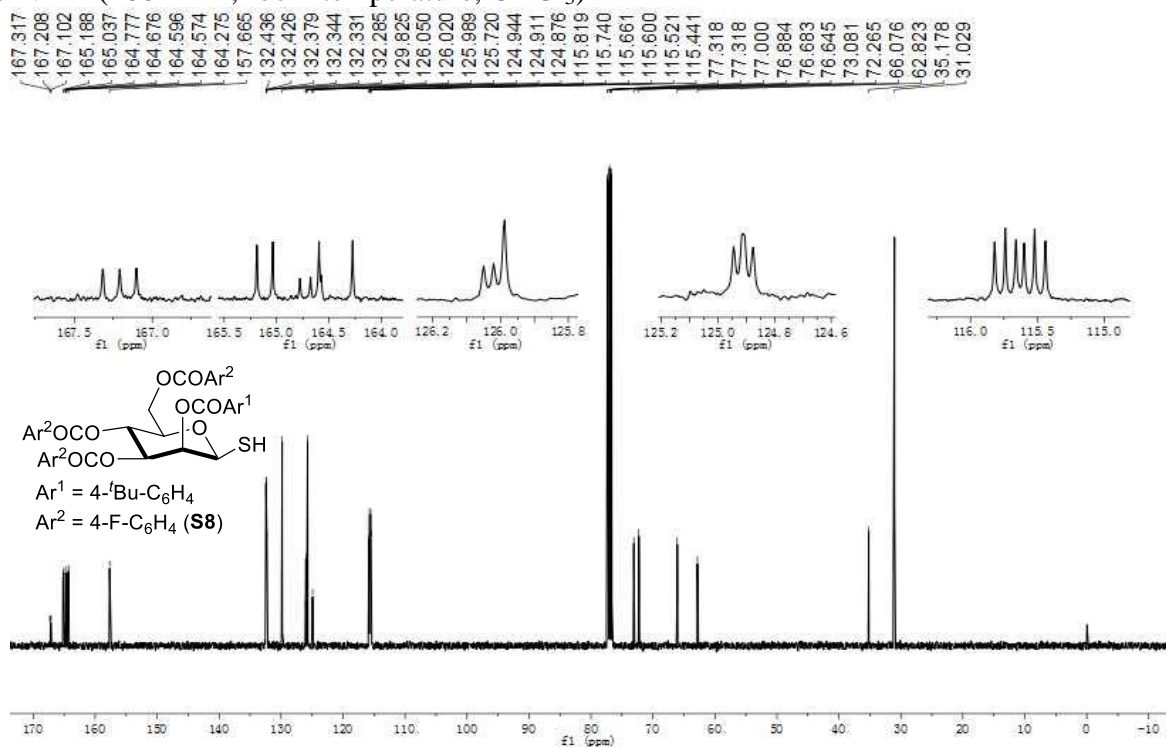

Supplementary Figure 33. <sup>13</sup>C NMR spectrum of compound **S8**

$^{19}\text{F}$  NMR (376 MHz, room temperature,  $\text{CDCl}_3$ )

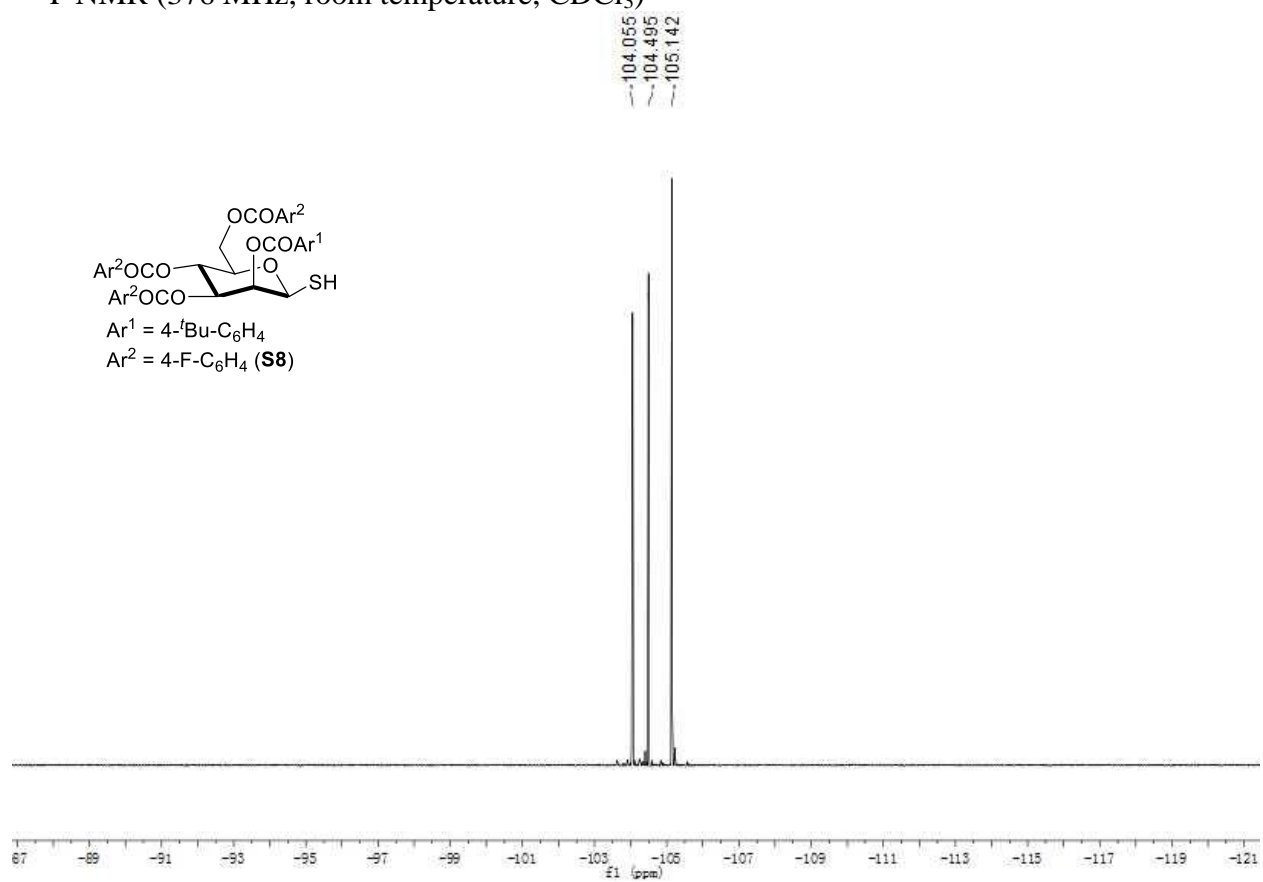

**Supplementary Figure 34.**  $^{19}\text{F}$  NMR spectrum of compound **S8**

<sup>1</sup>H NMR (400 MHz, room temperature, CDCl<sub>3</sub>)

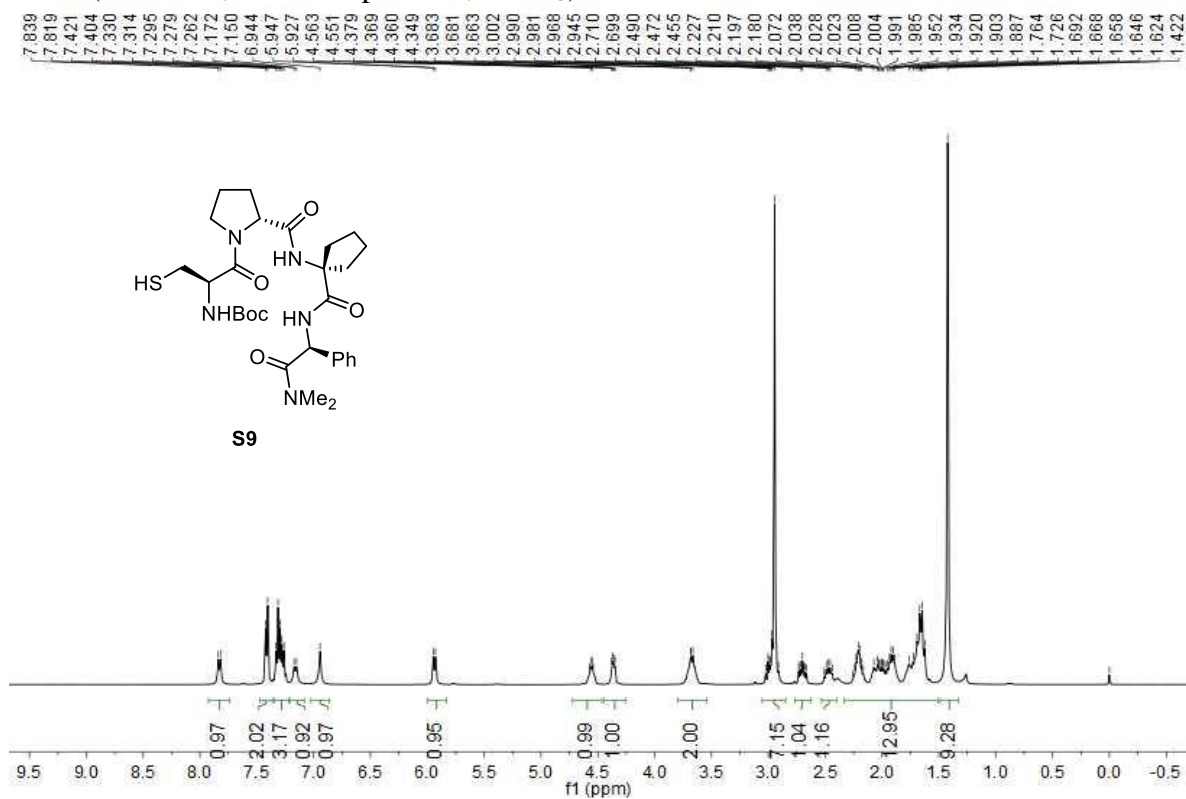

Supplementary Figure 35. <sup>1</sup>H NMR spectrum of compound S9

<sup>13</sup>C NMR (100 MHz, room temperature, CDCl<sub>3</sub>)

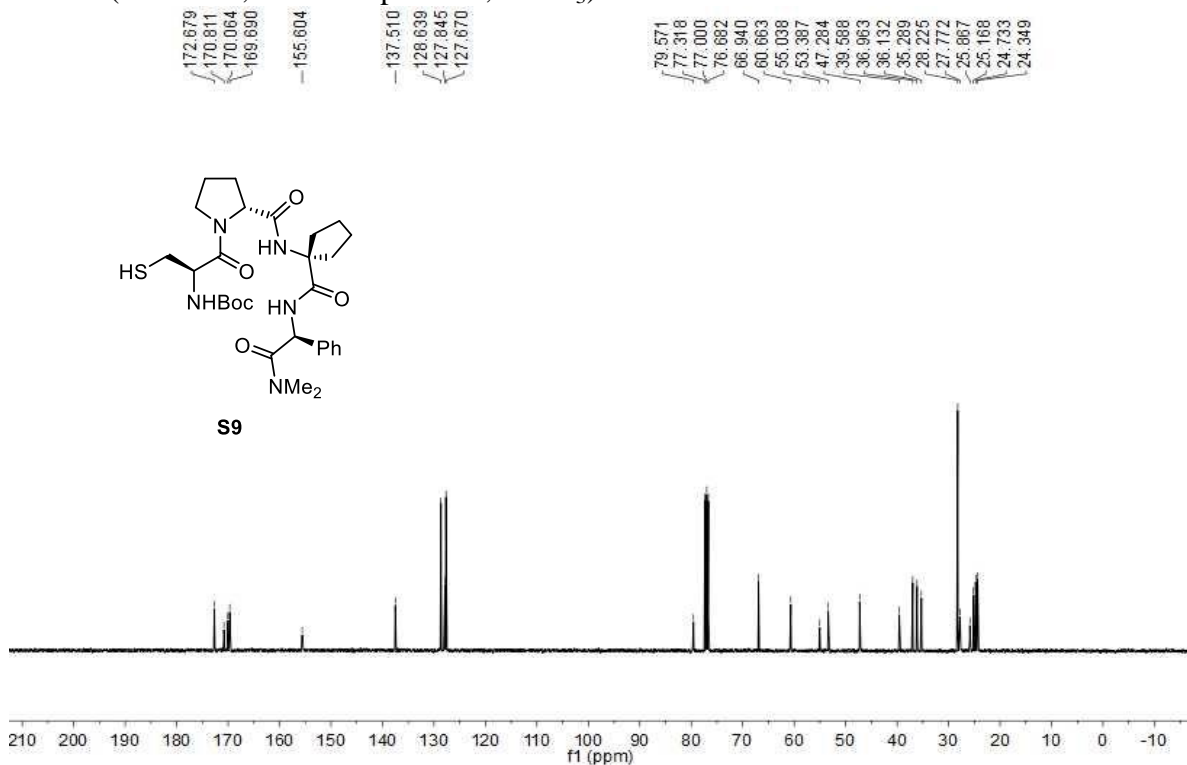

Supplementary Figure 36. <sup>13</sup>C NMR spectrum of compound S9

<sup>1</sup>H NMR (400 MHz, room temperature, CDCl<sub>3</sub>)

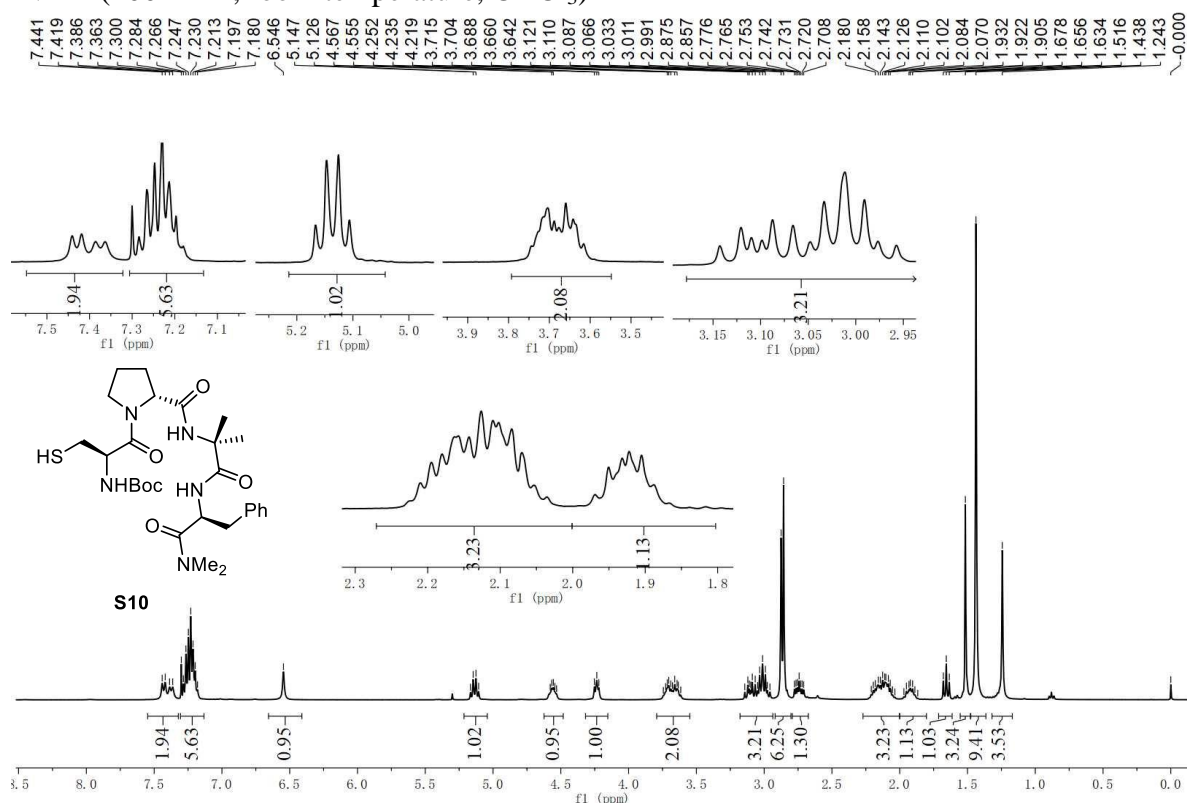

Supplementary Figure 37. <sup>1</sup>H NMR spectrum of compound S10

<sup>13</sup>C NMR (100 MHz, room temperature, CDCl<sub>3</sub>)

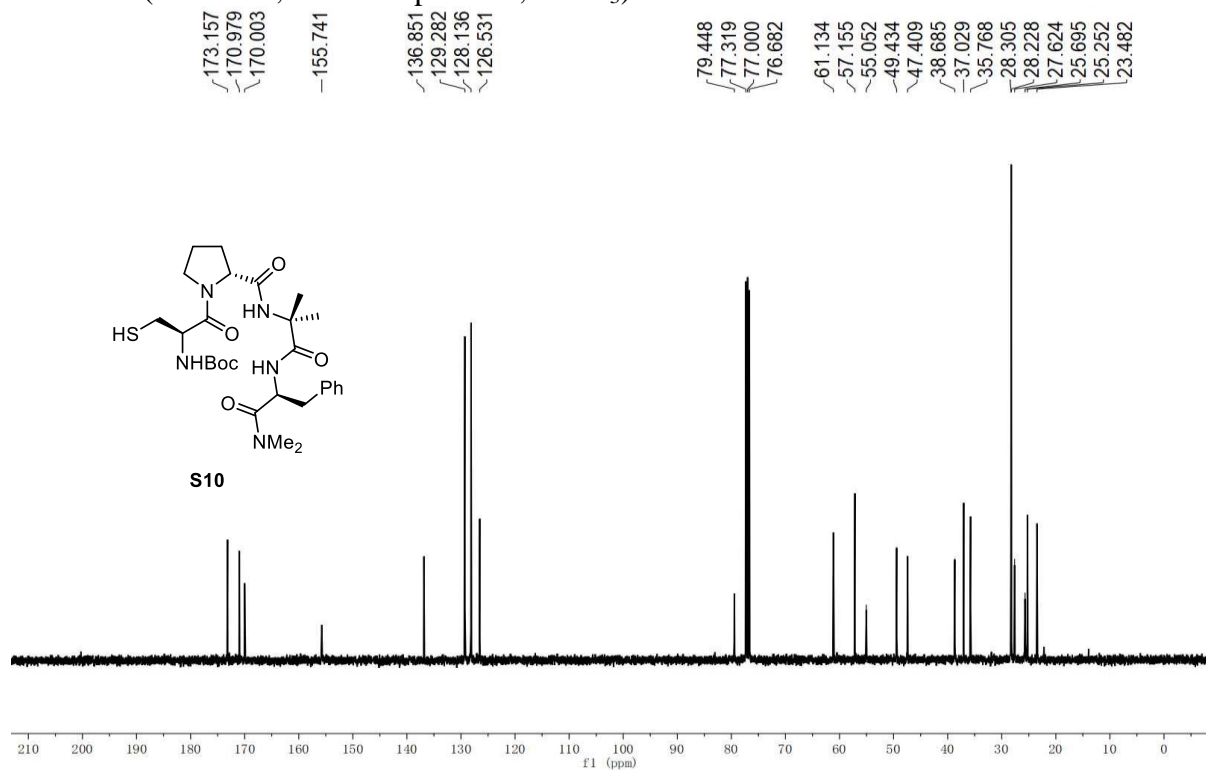

Supplementary Figure 38. <sup>13</sup>C NMR spectrum of compound S10



<sup>1</sup>H NMR (400 MHz, room temperature, CDCl<sub>3</sub>)

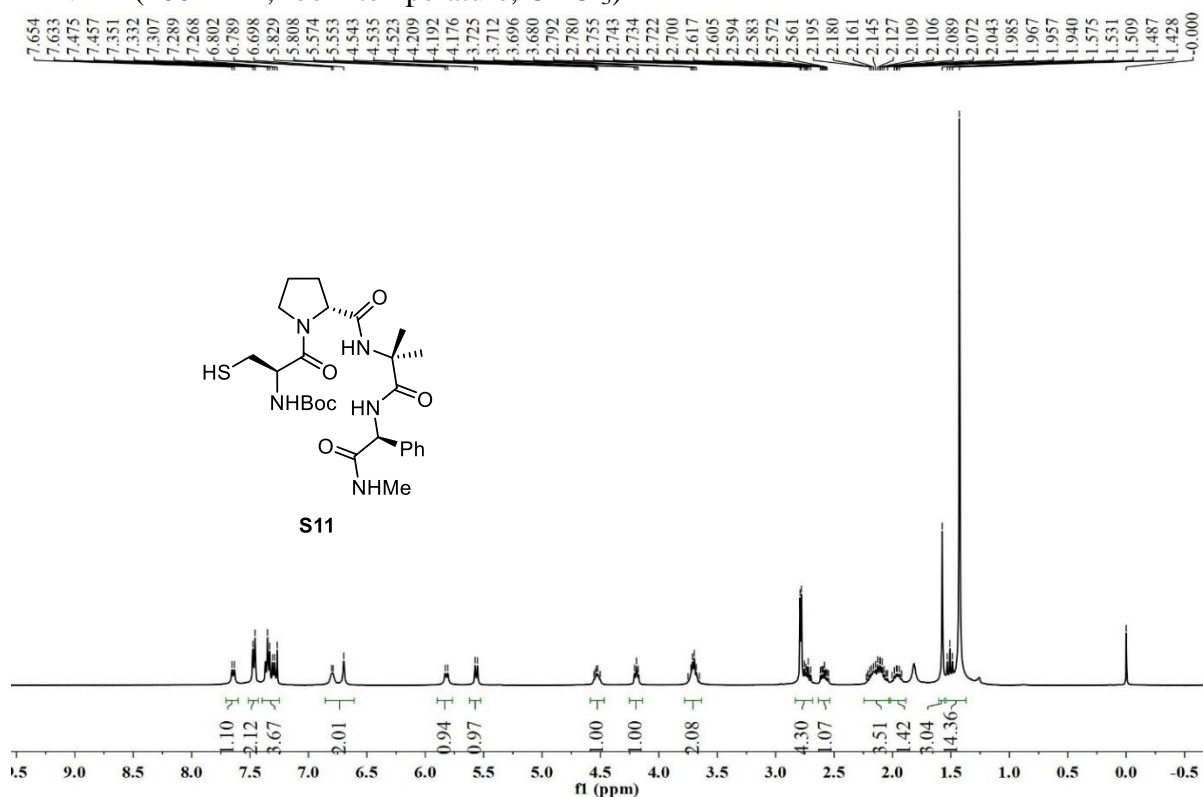

Supplementary Figure 39. <sup>1</sup>H NMR spectrum of compound S11

<sup>13</sup>C NMR (100 MHz, room temperature, CDCl<sub>3</sub>)

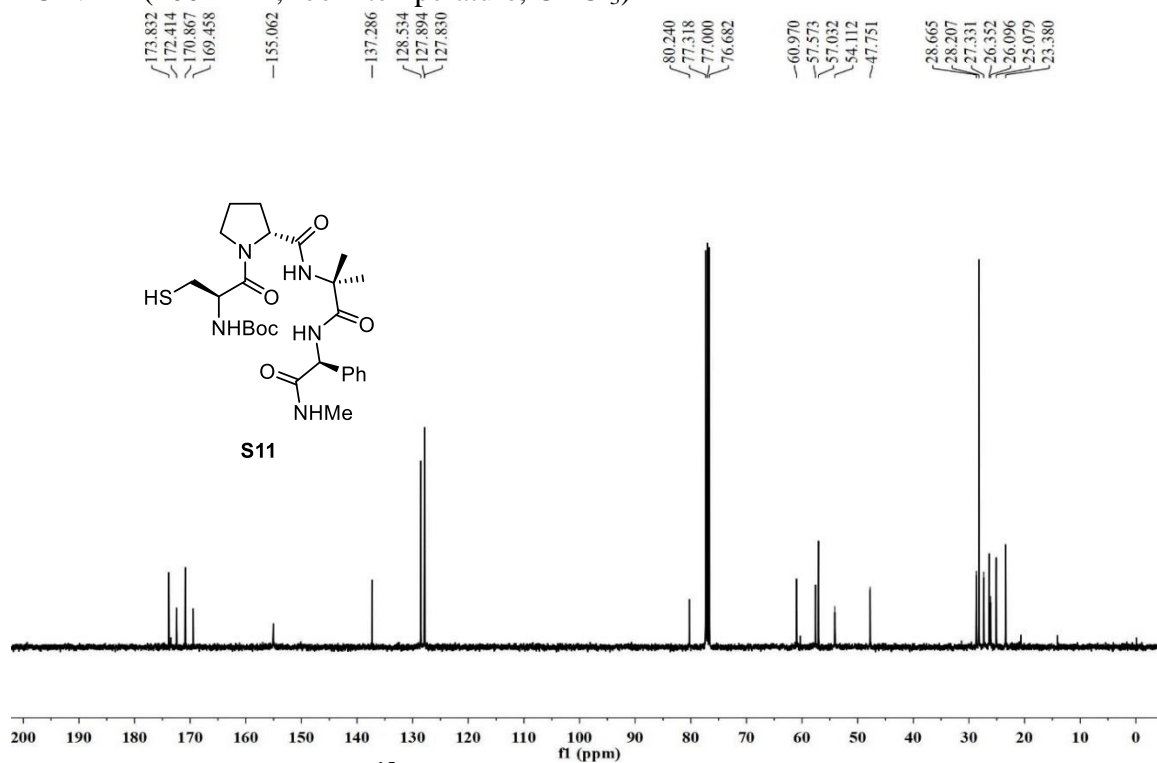

Supplementary Figure 40. <sup>13</sup>C NMR spectrum of compound S11

<sup>1</sup>H NMR (400 MHz, room temperature, CDCl<sub>3</sub>)

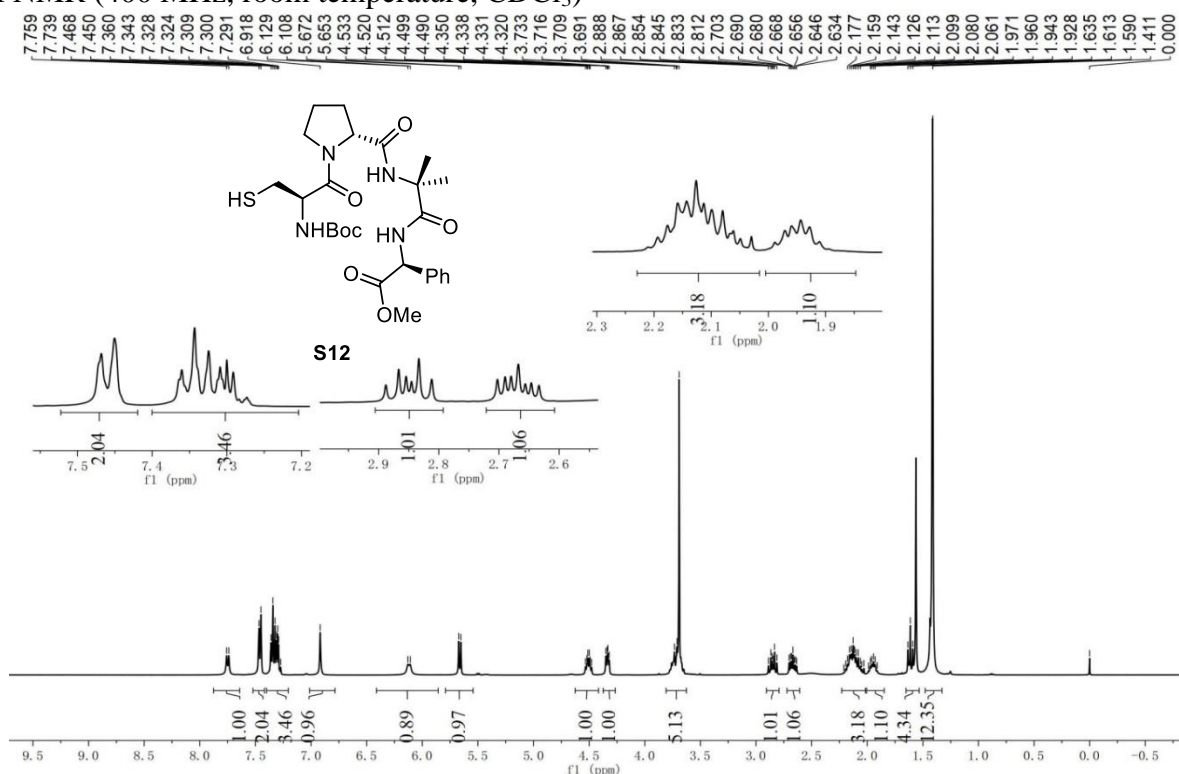

Supplementary Figure 41. <sup>1</sup>H NMR spectrum of compound S12

<sup>13</sup>C NMR (100 MHz, room temperature, CDCl<sub>3</sub>)

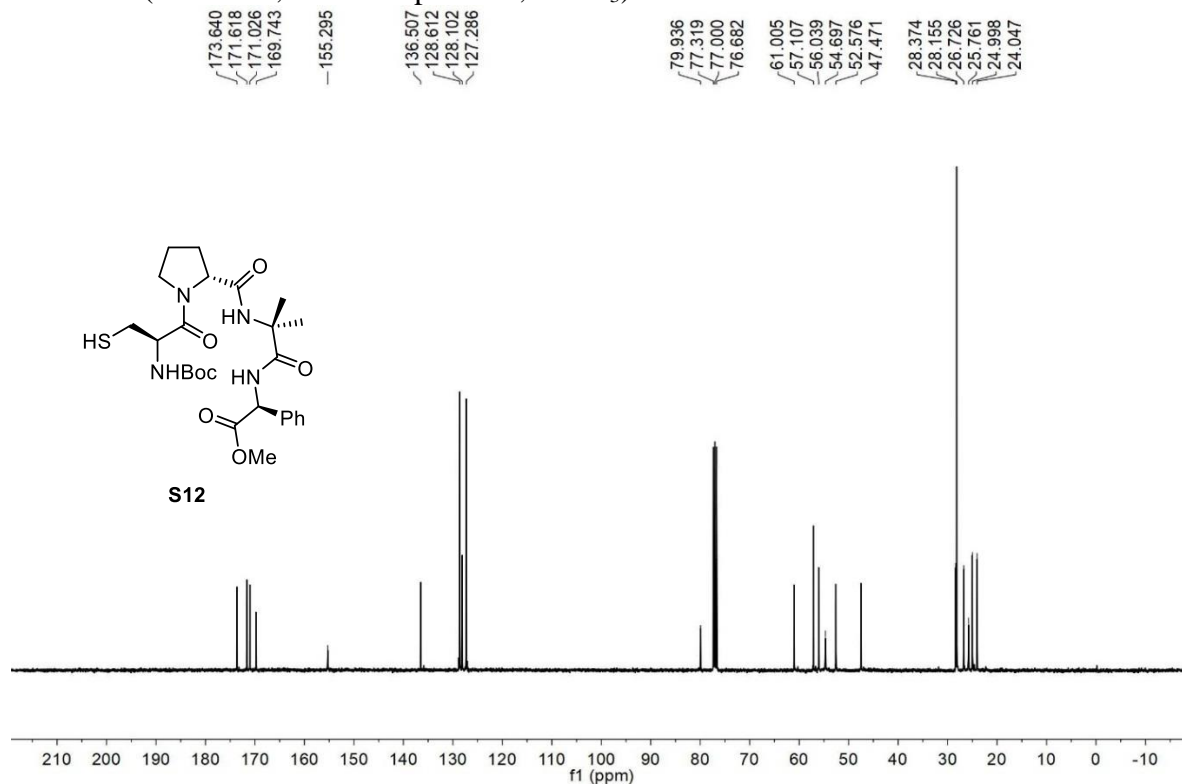

Supplementary Figure 42. <sup>13</sup>C NMR spectrum of compound S12

<sup>1</sup>H NMR (400 MHz, room temperature, CDCl<sub>3</sub>)

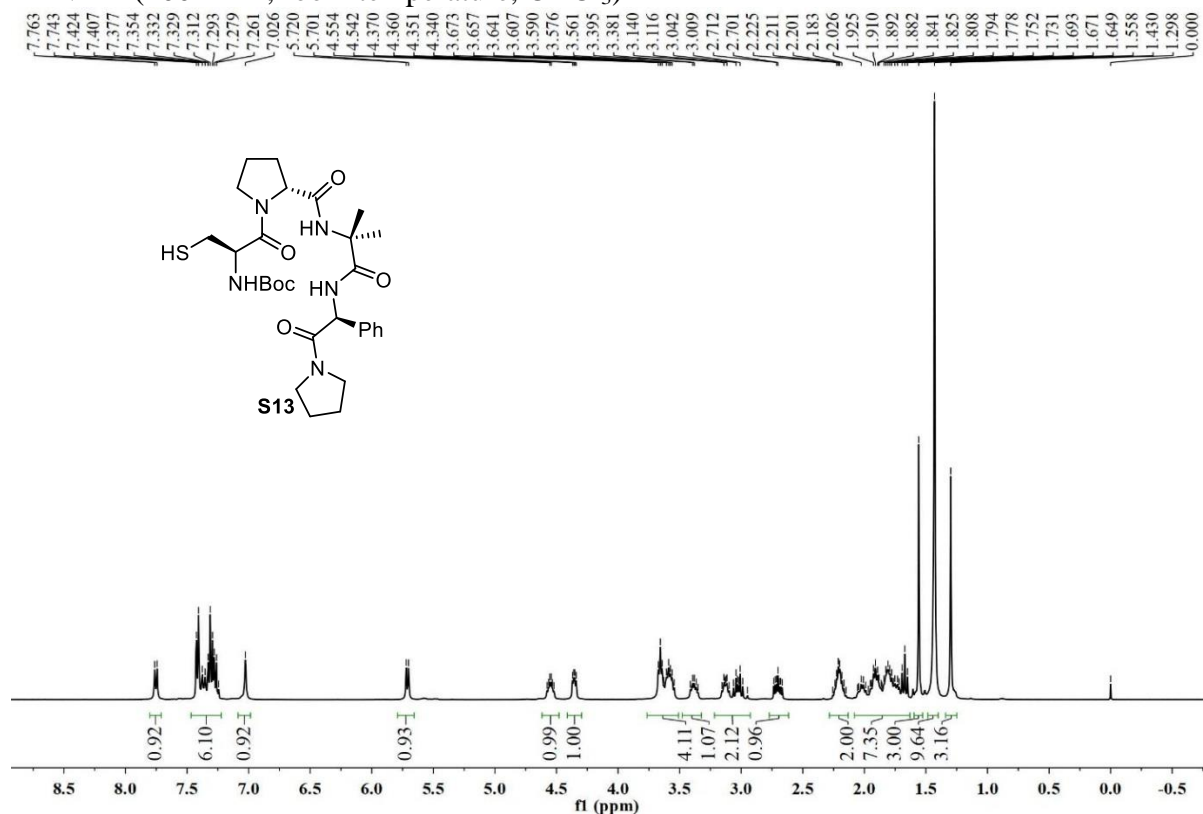

**Supplementary Figure 43.** <sup>1</sup>H NMR spectrum of compound S13

<sup>13</sup>C NMR (100 MHz, room temperature, CDCl<sub>3</sub>)

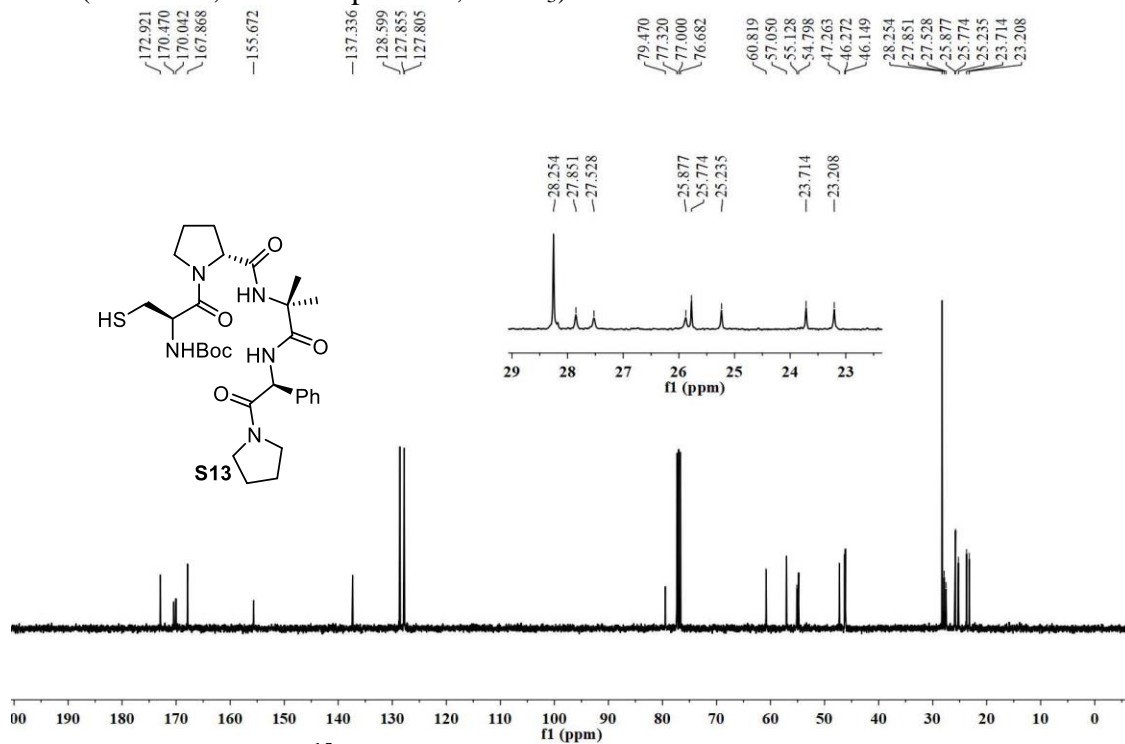

**Supplementary Figure 44.** <sup>13</sup>C NMR spectrum of compound S13

<sup>1</sup>H NMR (400 MHz, room temperature, CDCl<sub>3</sub>)

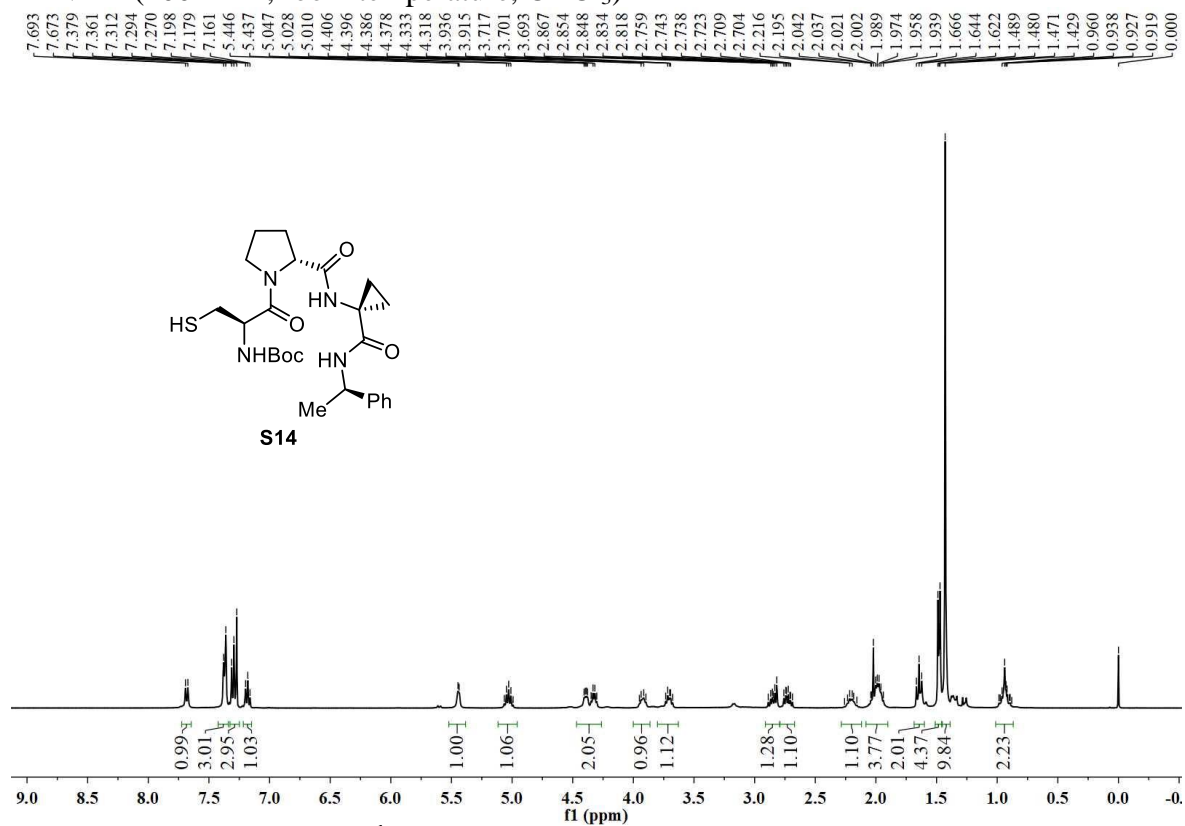

Supplementary Figure 45. <sup>1</sup>H NMR spectrum of compound S14

<sup>13</sup>C NMR (100 MHz, room temperature, CDCl<sub>3</sub>)

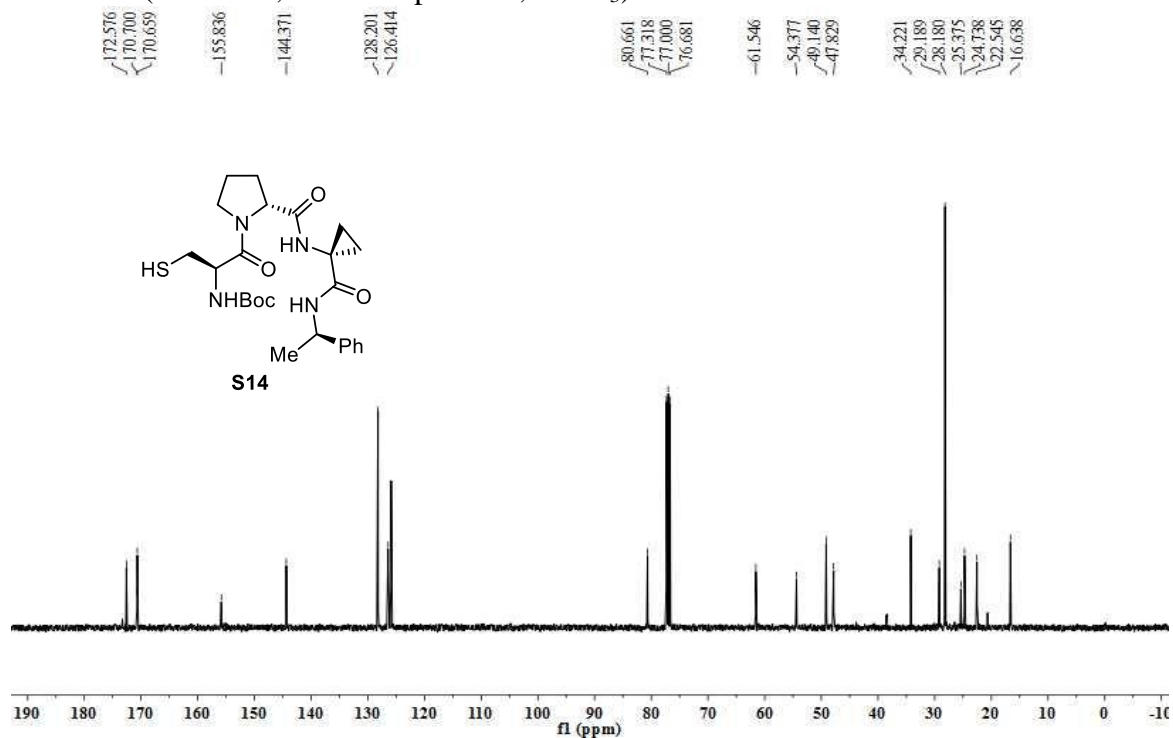

Supplementary Figure 46. <sup>13</sup>C NMR spectrum of compound S14

$^1\text{H}$  NMR (400 MHz, room temperature,  $\text{CDCl}_3$ )

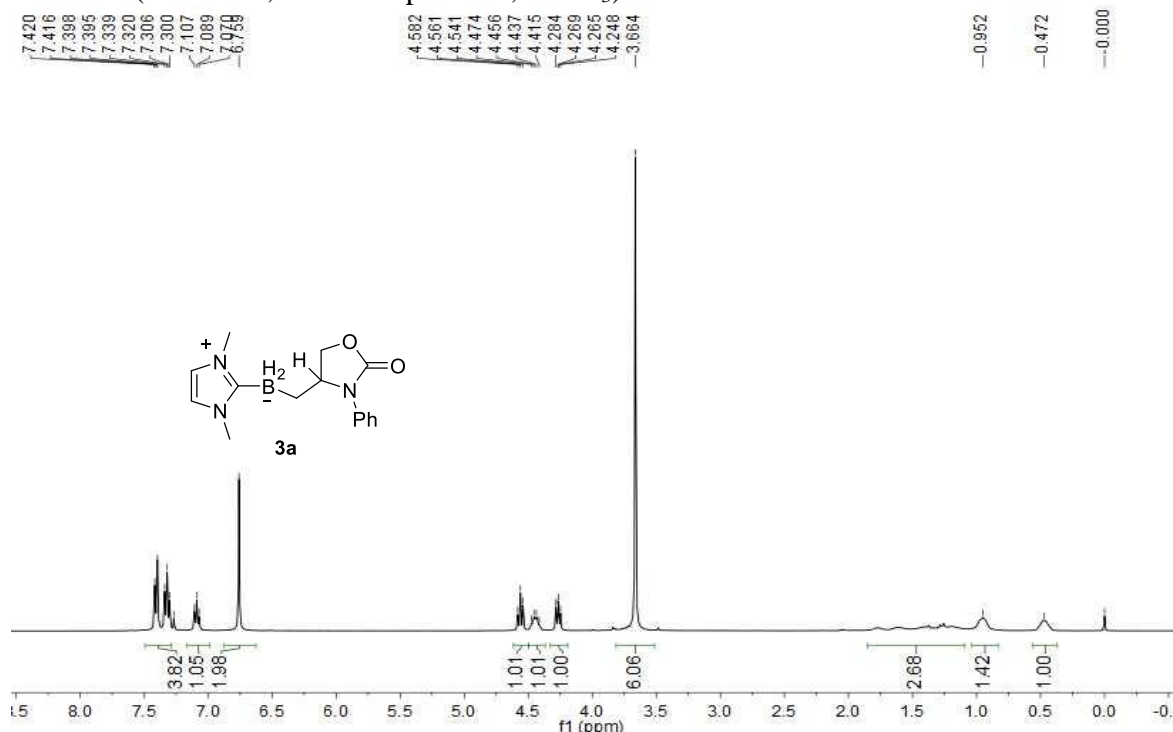

**Supplementary Figure 47.**  $^1\text{H}$  NMR spectrum of racemic and non-deuterated compound **3a**

$^1\text{H}$  NMR (400 MHz, room temperature,  $\text{CDCl}_3$ )

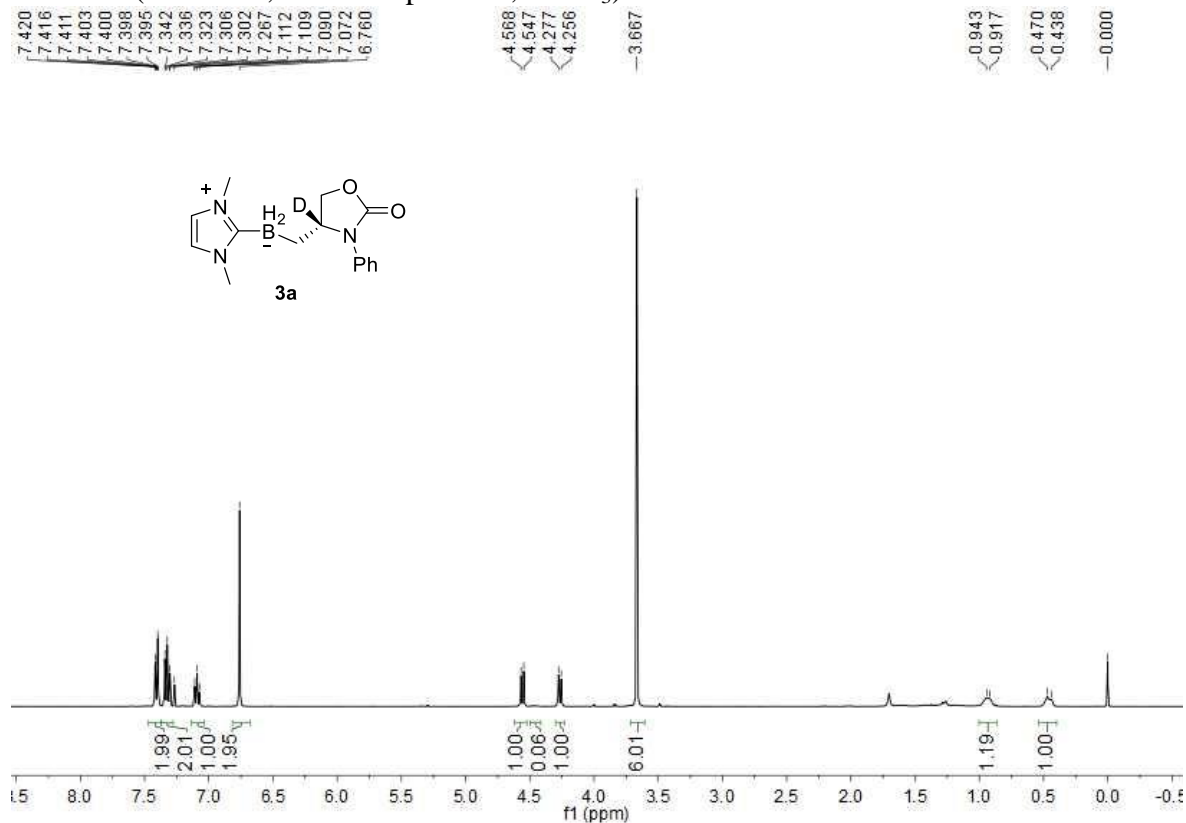

**Supplementary Figure 48.**  $^1\text{H}$  NMR spectrum of compound **3a**

$^{13}\text{C}$  NMR (100 MHz, room temperature,  $\text{CDCl}_3$ )

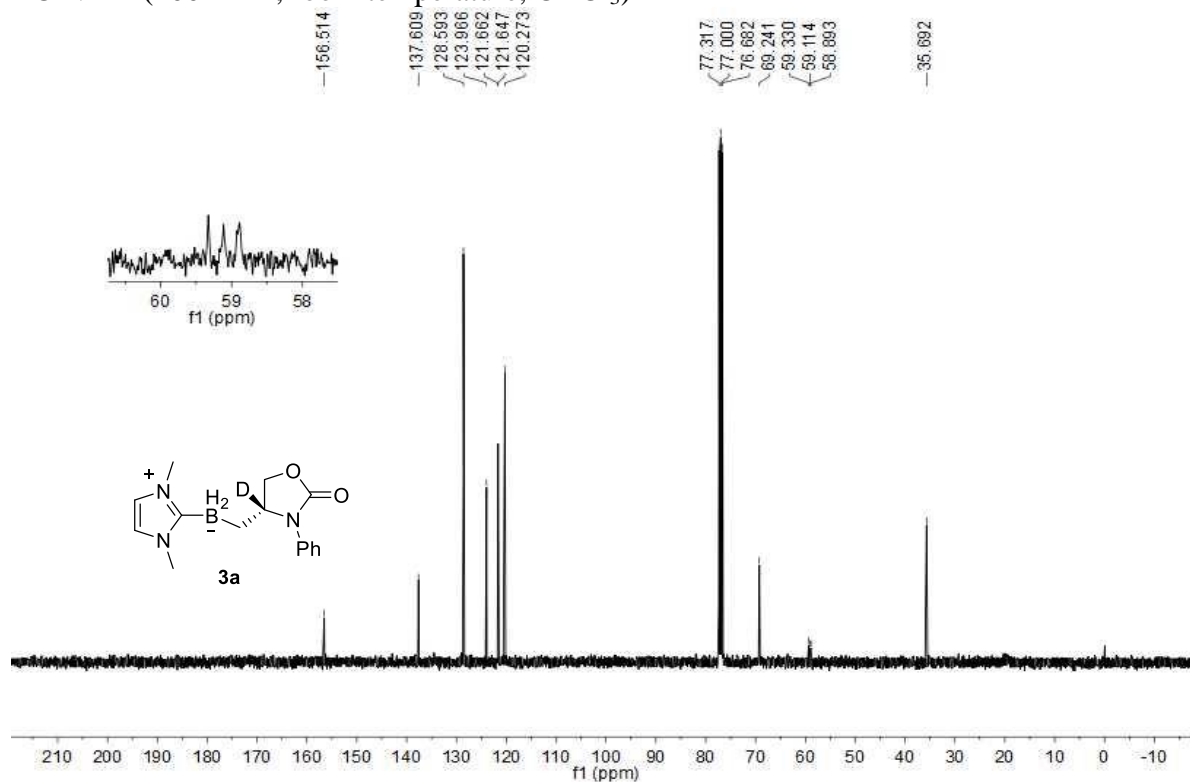

**Supplementary Figure 49.**  $^{13}\text{C}$  NMR spectrum of compound **3a**

$^{11}\text{B}$  NMR (128 MHz, room temperature,  $\text{CDCl}_3$ )

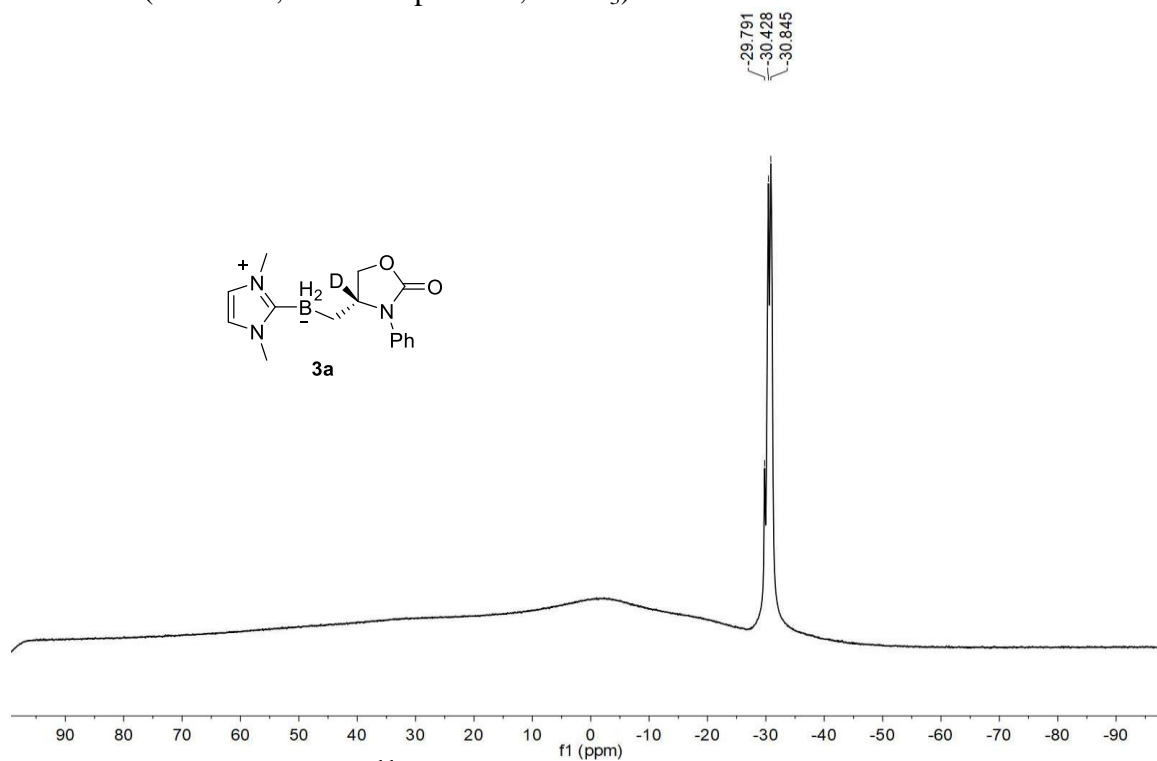

**Supplementary Figure 50.**  $^{11}\text{B}$  NMR spectrum of compound **3a**

### HPLC spectrum of racemic **3a**

Vial# : 11  
 Data File : SQL-6-280-2-RACEMIC(1).lcd  
 Method File : 4OD-H-60-0.5-214.lcm  
 Date Acquired : 12/9/2021 10:34:07 AM  
 Date Processed : 1/25/2022 12:35:14 AM

<Chromatogram View>

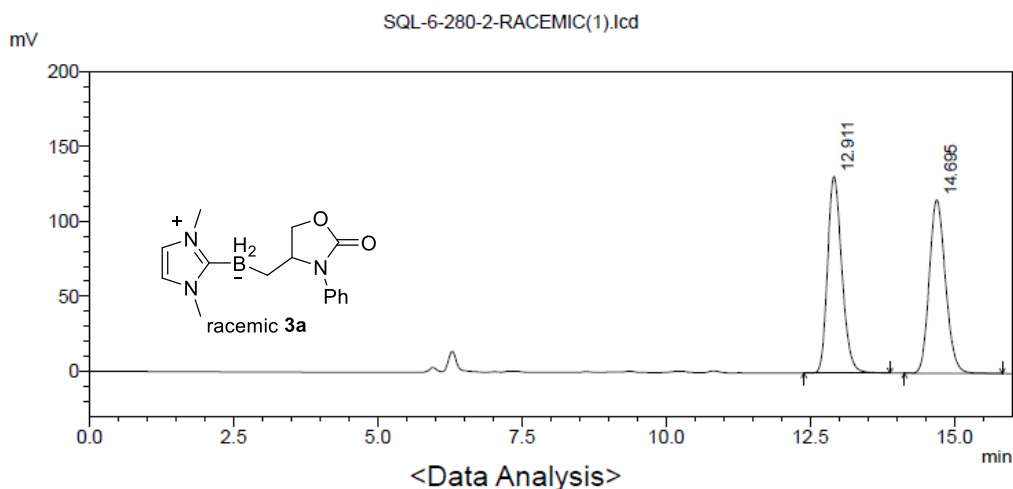

Detector A 214nm

| Pesk # | Ret. Time | Height | Area    | Area%   |
|--------|-----------|--------|---------|---------|
| 1      | 12.911    | 131195 | 2261994 | 49.950  |
| 2      | 14.695    | 115749 | 2266525 | 50.050  |
| Total  |           | 246943 | 4528519 | 100.000 |

### Supplementary Figure 51. HPLC spectrum of racemic **3a**

#### HPLC spectrum of **3a**

Sample Name :  
 Tray# : 1  
 Vial# : 14  
 Data File : sql-6-354-CHIRAL(1).lcd  
 Method File : 4OD-H-60-0.5-214.lcm  
 Date Acquired : 12/31/2021 7:17:22 PM  
 Date Processed : 1/25/2022 12:34:49 AM

<Chromatogram View>

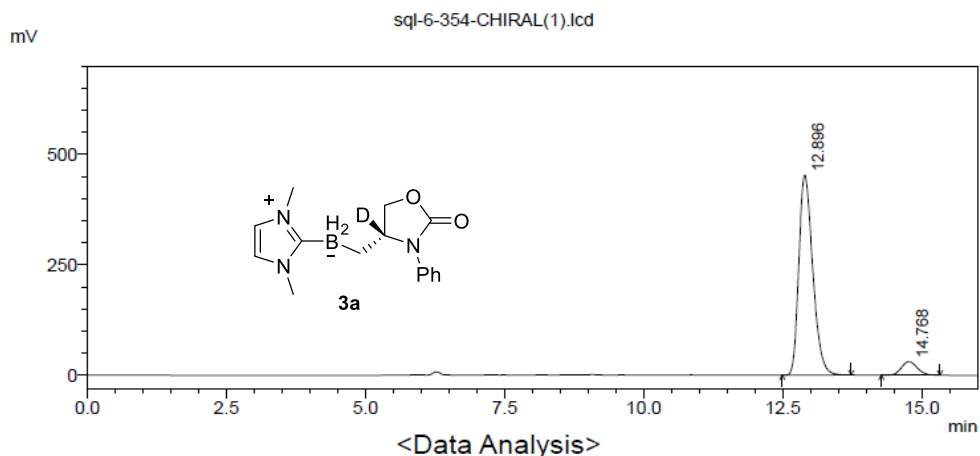

Detector A 214nm

| Pesk # | Ret. Time | Height | Area    | Area%   |
|--------|-----------|--------|---------|---------|
| 1      | 12.896    | 452969 | 7902770 | 92.864  |
| 2      | 14.768    | 30863  | 607314  | 7.136   |
| Total  |           | 483832 | 8510084 | 100.000 |

### Supplementary Figure 52. HPLC spectrum of **3a**

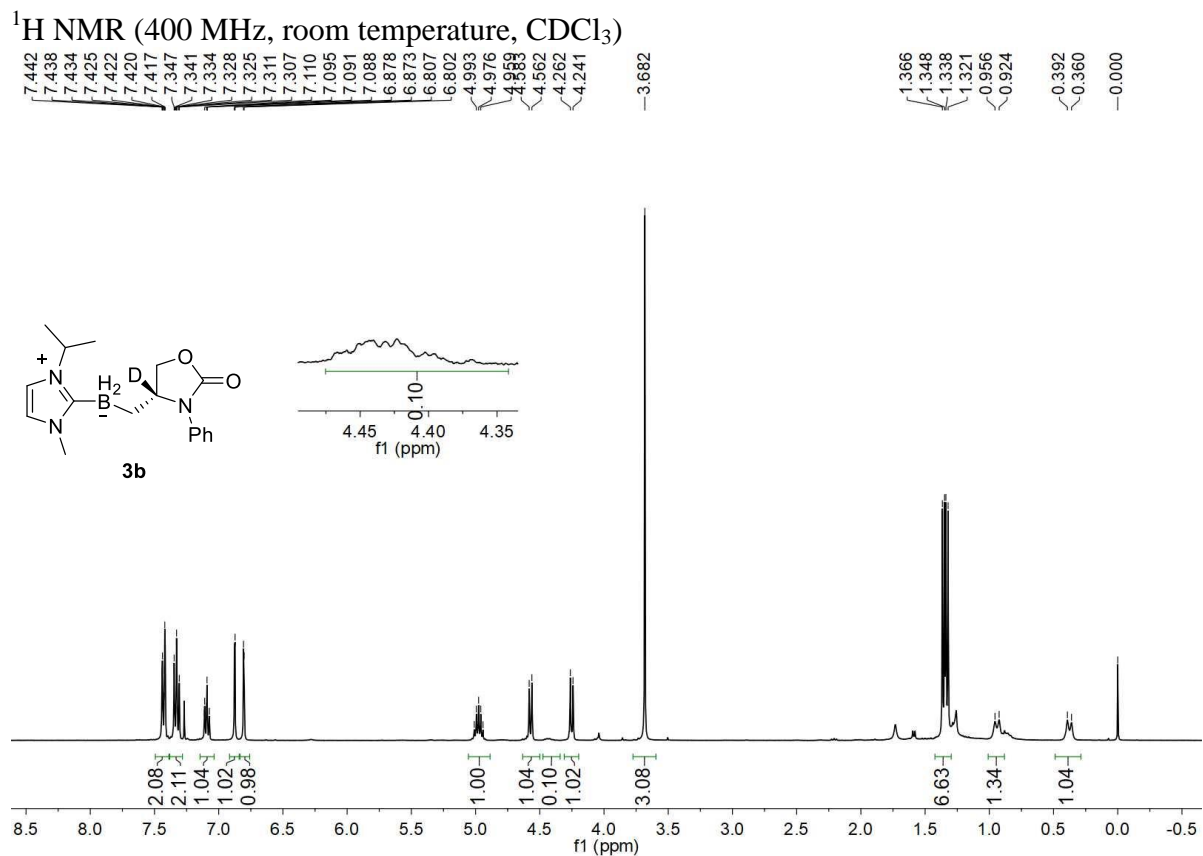

**Supplementary Figure 53.** <sup>1</sup>H NMR spectrum of compound **3b**

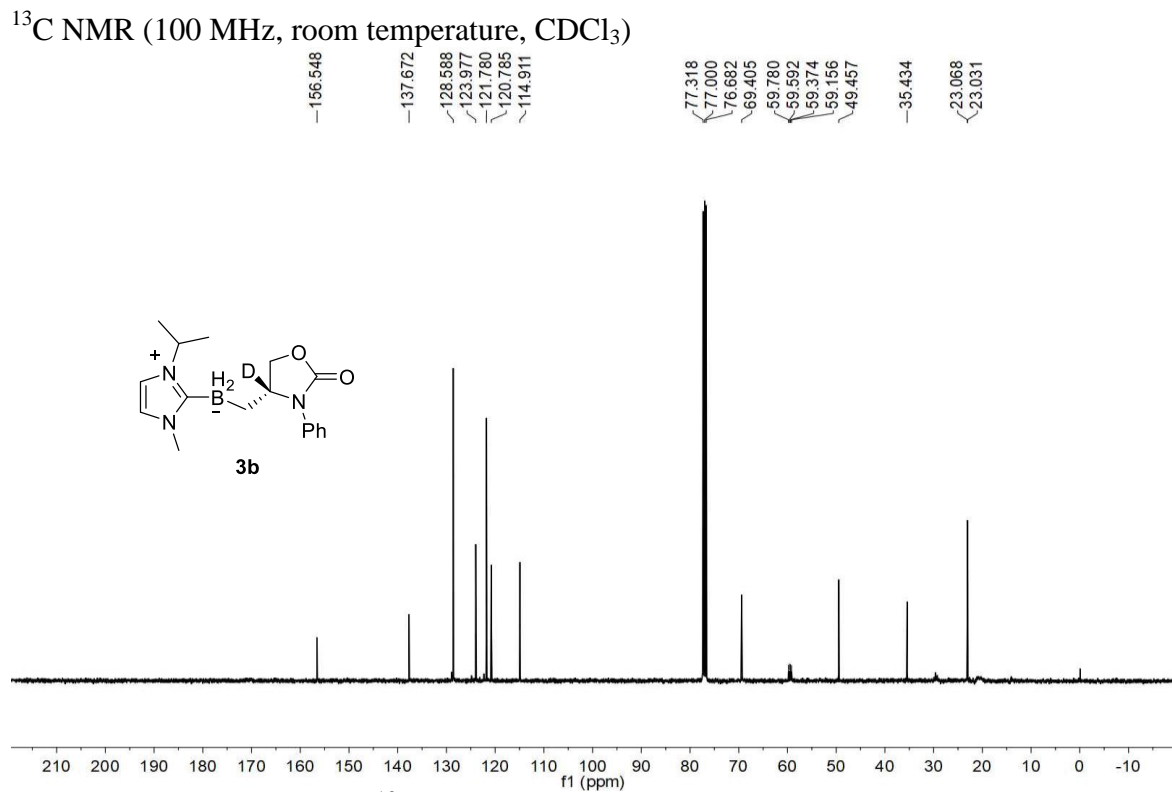

**Supplementary Figure 54.** <sup>13</sup>C NMR spectrum of compound **3b**



$^{11}\text{B}$  NMR (128 MHz, room temperature,  $\text{CDCl}_3$ )

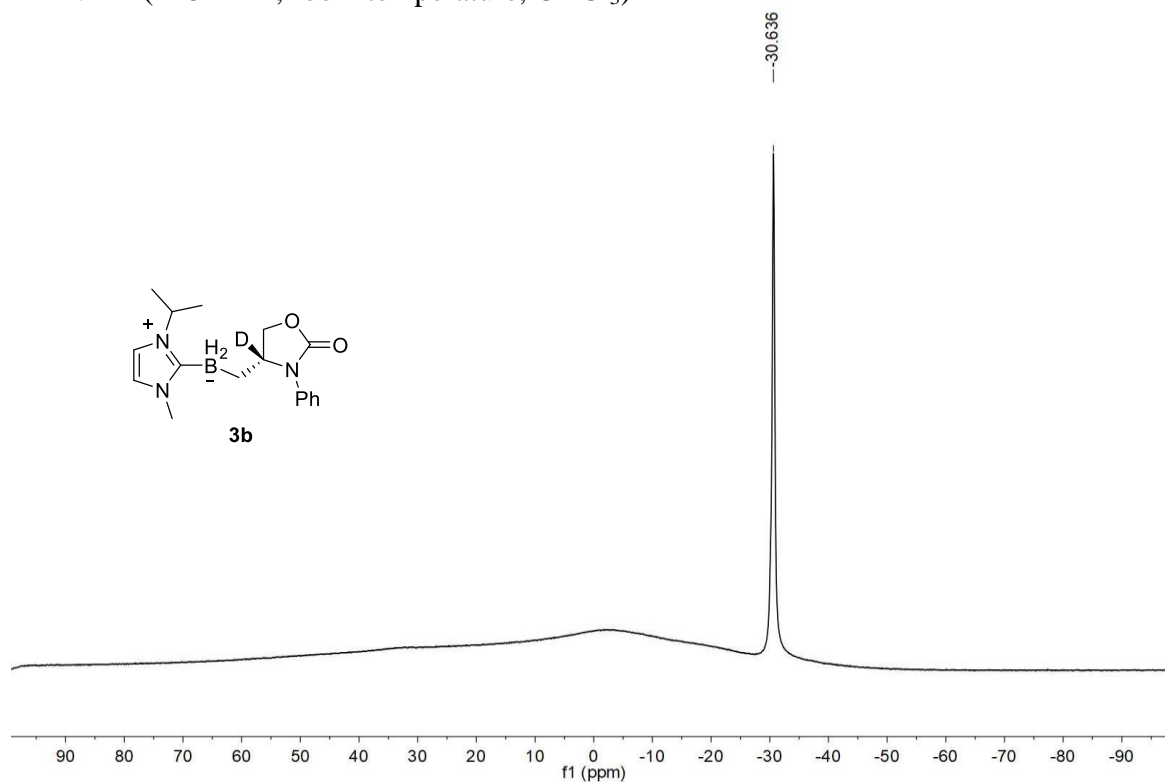

**Supplementary Figure 55.**  $^{11}\text{B}$  NMR spectrum of compound **3b**

HPLC spectrum of racemic **3b**

Sample Name :  
Tray# : 1  
Vial# : 5  
Data File : SQL-6-287-1-RAC-(3).lcd  
Method File : 40D-H-65-0.5-214.lcm  
Date Acquired : 12/11/2021 7:13:52 PM  
Date Processed : 1/25/2022 12:40:35 AM

<Chromatogram View>

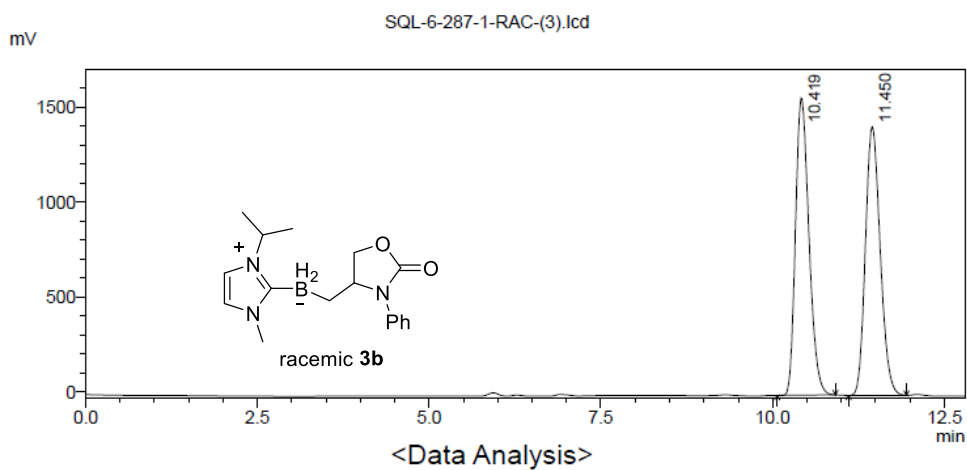

| Detector A 214nm |           |         |          |         |
|------------------|-----------|---------|----------|---------|
| Peak #           | Ret. Time | Height  | Area     | Area%   |
| 1                | 10.419    | 1565993 | 21335172 | 50.142  |
| 2                | 11.450    | 1414750 | 21214392 | 49.858  |
| Total            |           | 2980743 | 42549564 | 100.000 |

**Supplementary Figure 56.** HPLC spectrum of racemic **3b**

### HPLC spectrum of **3b**

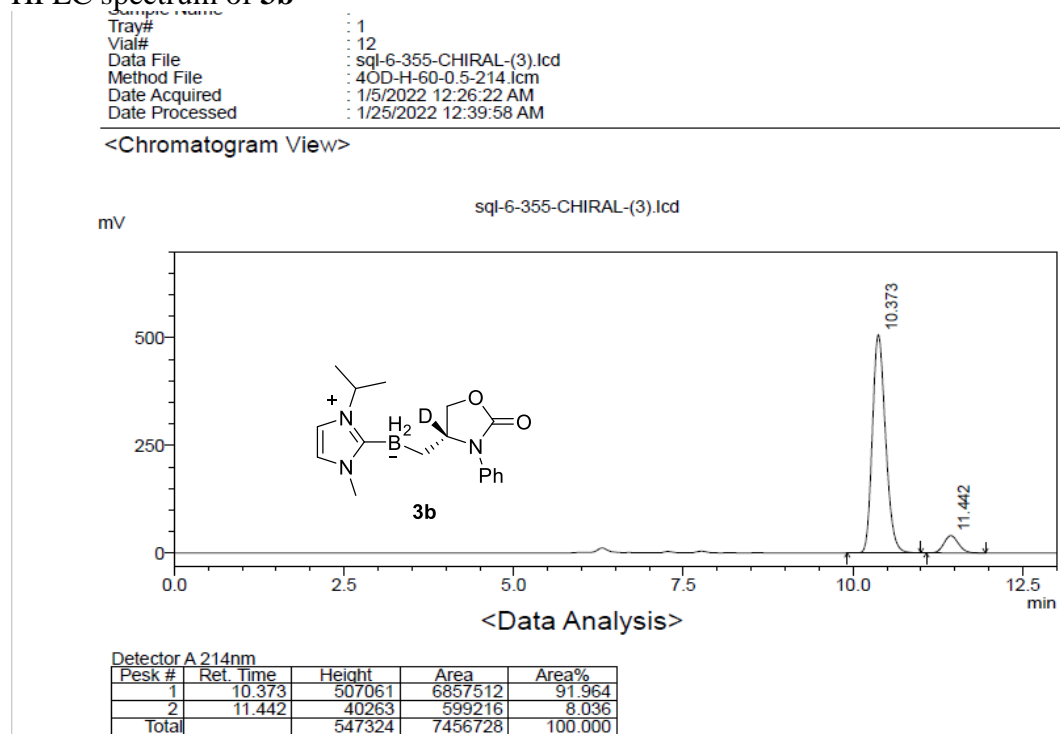

### Supplementary Figure 57. HPLC spectrum of **3b**

<sup>1</sup>H NMR (400 MHz, room temperature, CDCl<sub>3</sub>)

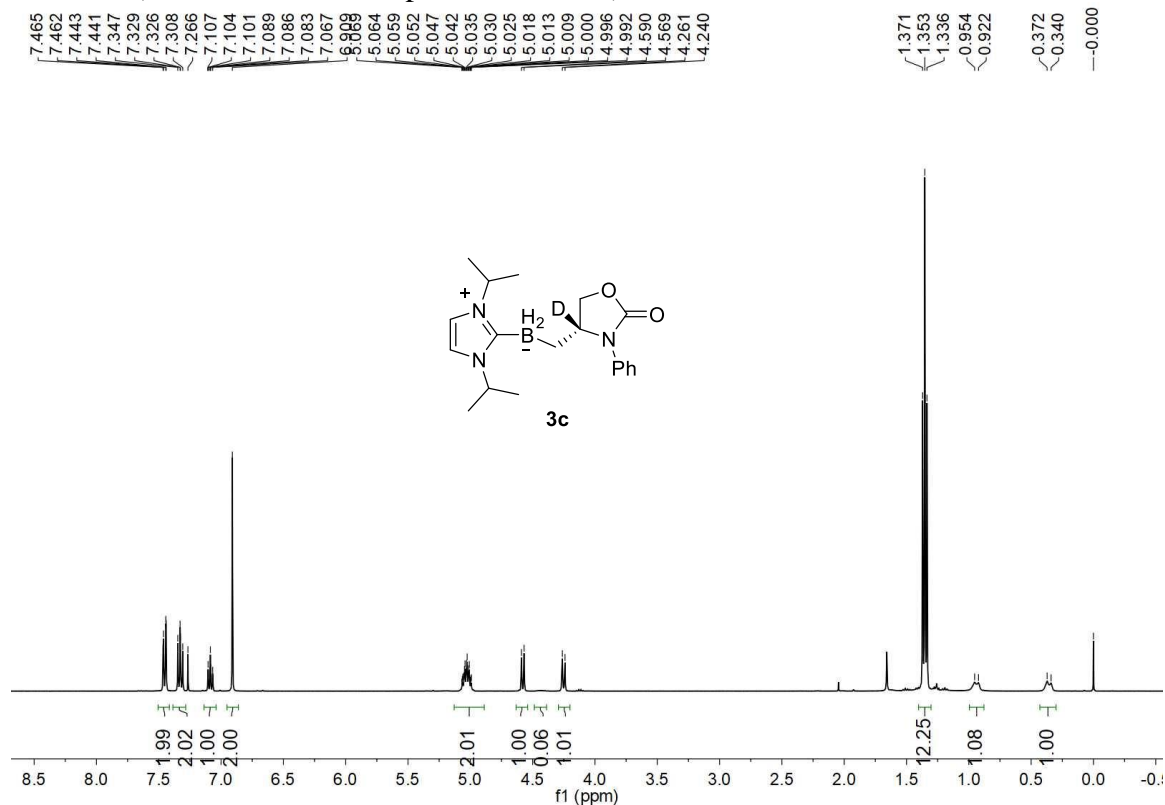

### Supplementary Figure 58. <sup>1</sup>H NMR spectrum of compound **3c**

$^{13}\text{C}$  NMR (100 MHz, room temperature,  $\text{CDCl}_3$ )

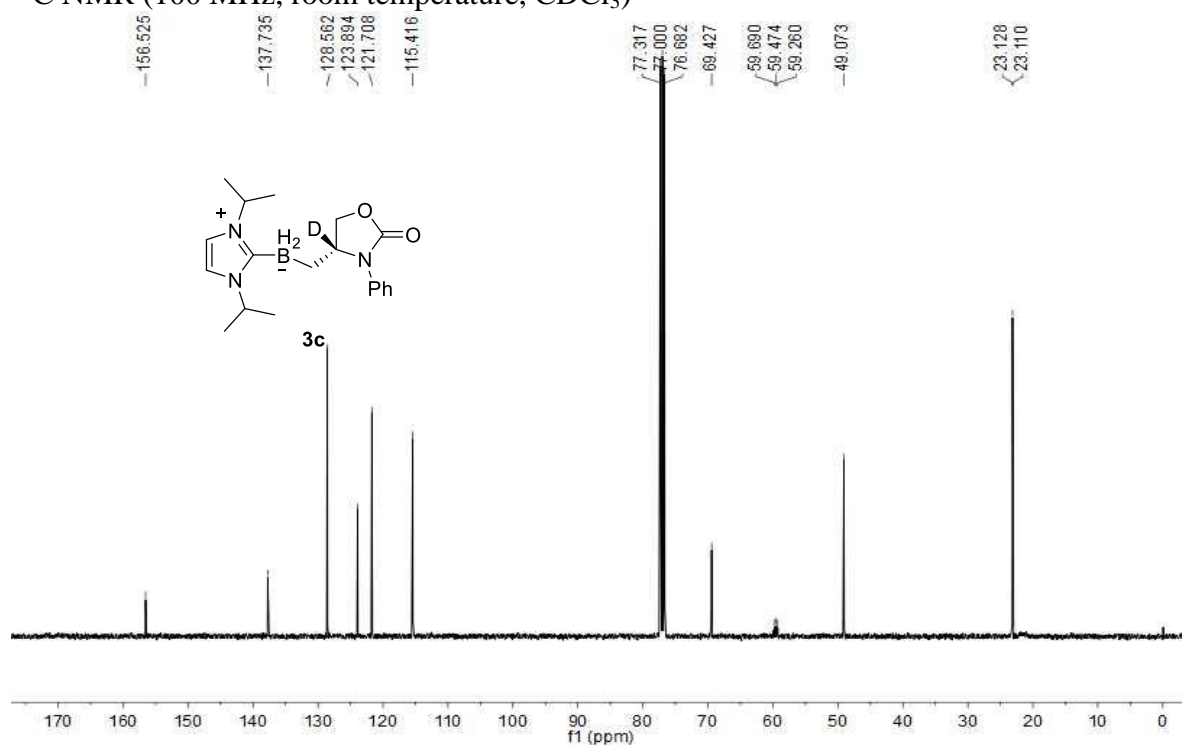

**Supplementary Figure 59.**  $^{13}\text{C}$  NMR spectrum of compound **3c**

$^{11}\text{B}$  NMR (128 MHz, room temperature,  $\text{CDCl}_3$ )

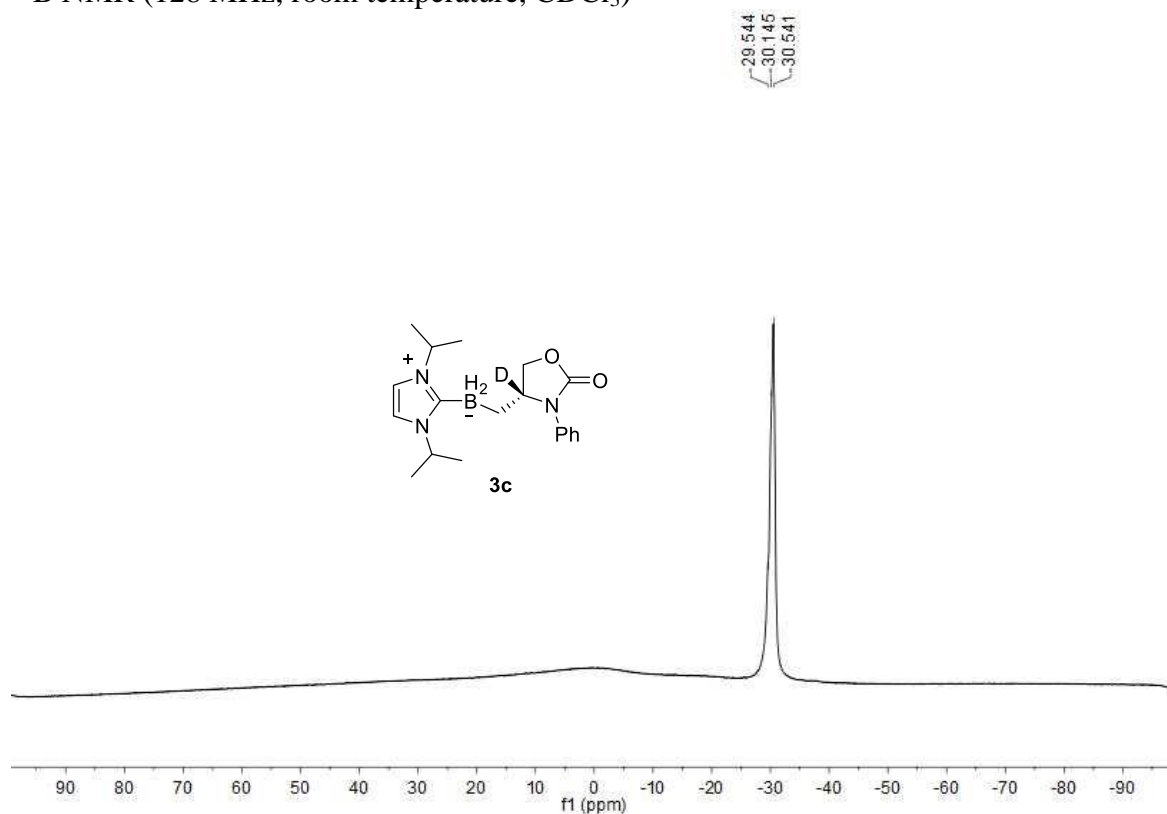

**Supplementary Figure 60.**  $^{11}\text{B}$  NMR spectrum of compound **3c**

### HPLC spectrum of racemic **3c**

Sample Name :  
 Tray# : 1  
 Vial# : 11  
 Data File : sql-6-348-1-RAC-(4).lcd  
 Method File : 4OD-H-75-0.5-214.lcm  
 Date Acquired : 1/3/2022 3:28:10 PM  
 Date Processed : 1/25/2022 12:42:12 AM

<Chromatogram View>

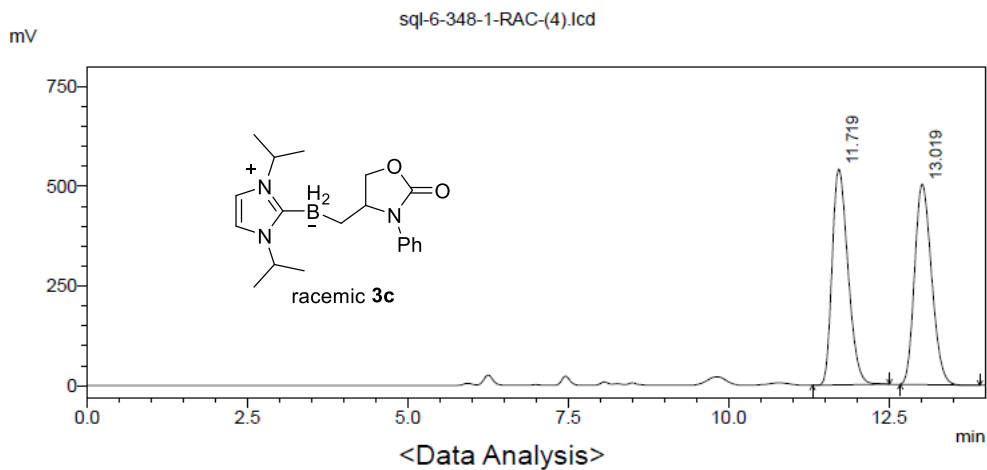

Detector A 214nm

| Peak # | Ret. Time | Height  | Area     | Area%   |
|--------|-----------|---------|----------|---------|
| 1      | 11.719    | 541719  | 9337584  | 50.146  |
| 2      | 13.019    | 502811  | 9283379  | 49.854  |
| Total  |           | 1044529 | 18620963 | 100.000 |

### Supplementary Figure 61. HPLC spectrum of racemic **3c**

### HPLC spectrum of **3c**

Sample Name :  
 Tray# : 1  
 Vial# : 13  
 Data File : sql-6-348-2-CHIRAL-(4).lcd  
 Method File : 4OD-H-75-0.5-214.lcm  
 Date Acquired : 1/3/2022 7:09:30 PM  
 Date Processed : 1/25/2022 1:47:07 AM

<Chromatogram View>

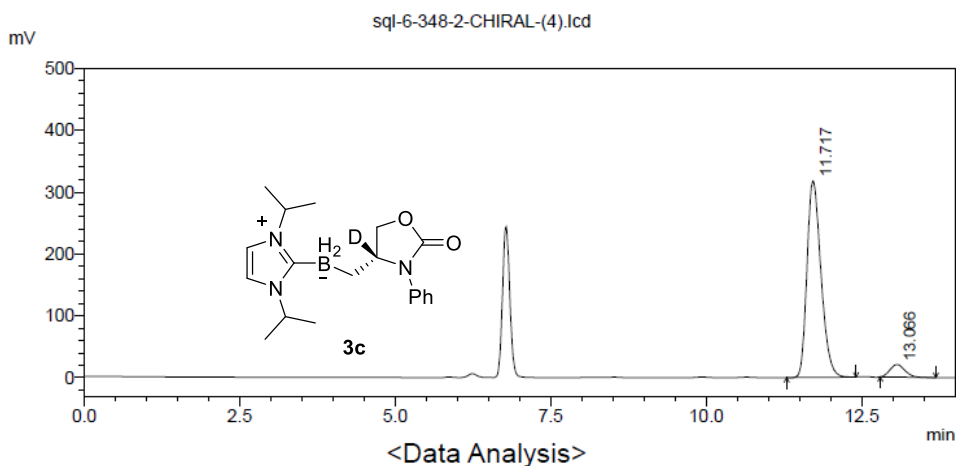

Detector A 214nm

| Peak # | Ret. Time | Height | Area    | Area%   |
|--------|-----------|--------|---------|---------|
| 1      | 11.717    | 317796 | 4961302 | 93.684  |
| 2      | 13.066    | 20193  | 334489  | 6.316   |
| Total  |           | 337989 | 5295791 | 100.000 |

### Supplementary Figure 62. HPLC spectrum of **3c**

<sup>1</sup>H NMR (400 MHz, room temperature, CDCl<sub>3</sub>)

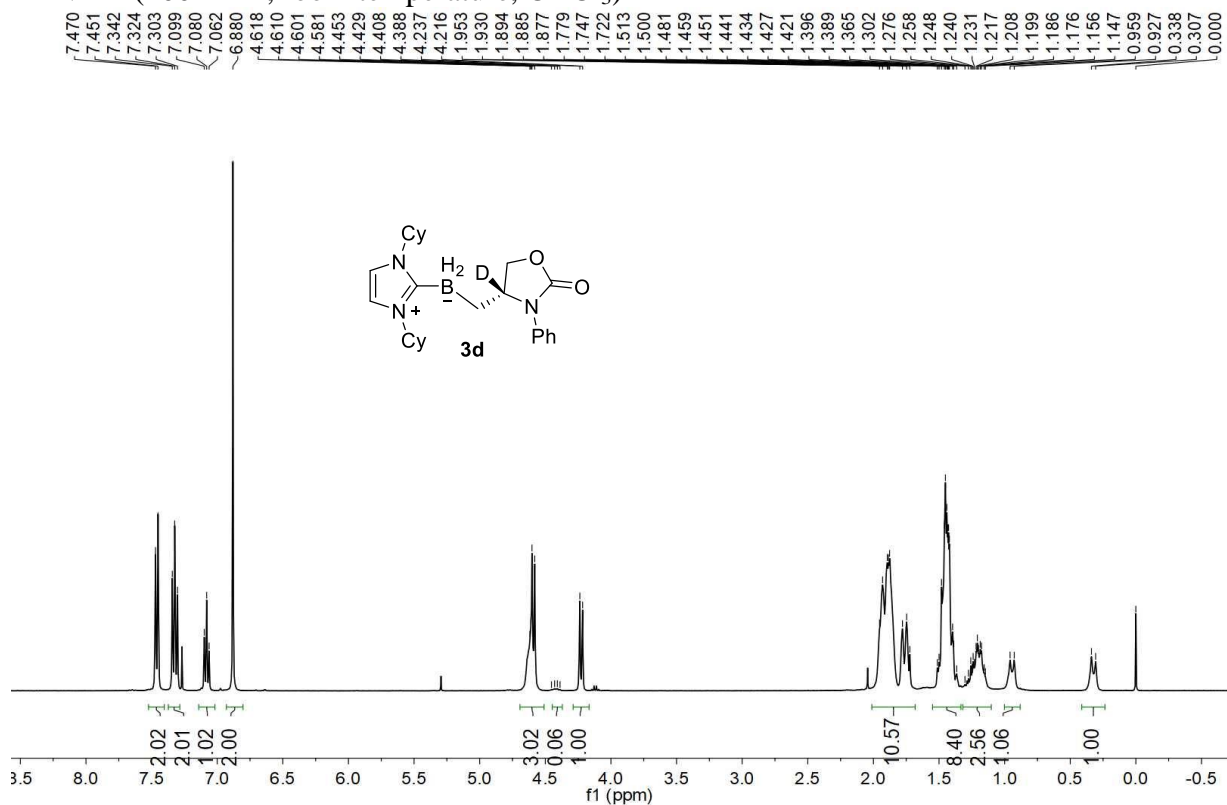

Supplementary Figure 63. <sup>1</sup>H NMR spectrum of compound 3d

<sup>13</sup>C NMR (100 MHz, room temperature, CDCl<sub>3</sub>)

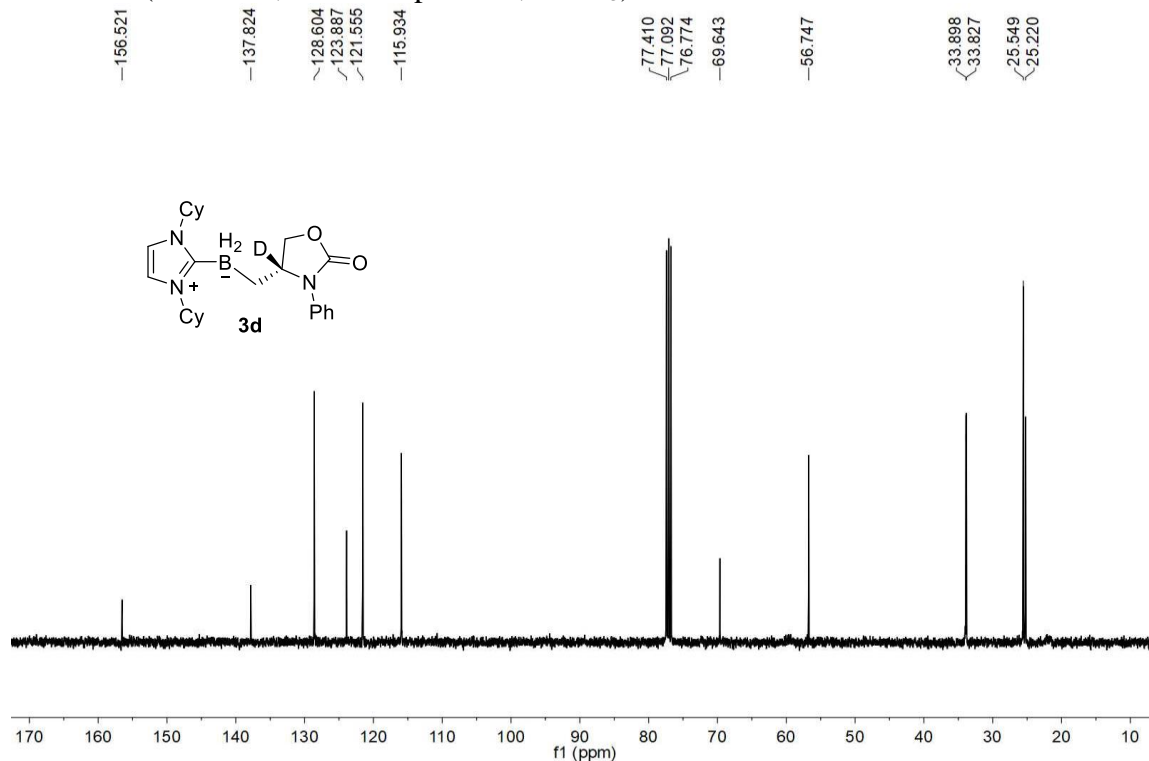

Supplementary Figure 64. <sup>13</sup>C NMR spectrum of compound 3d

$^{11}\text{B}$  NMR (128 MHz, room temperature,  $\text{CDCl}_3$ )

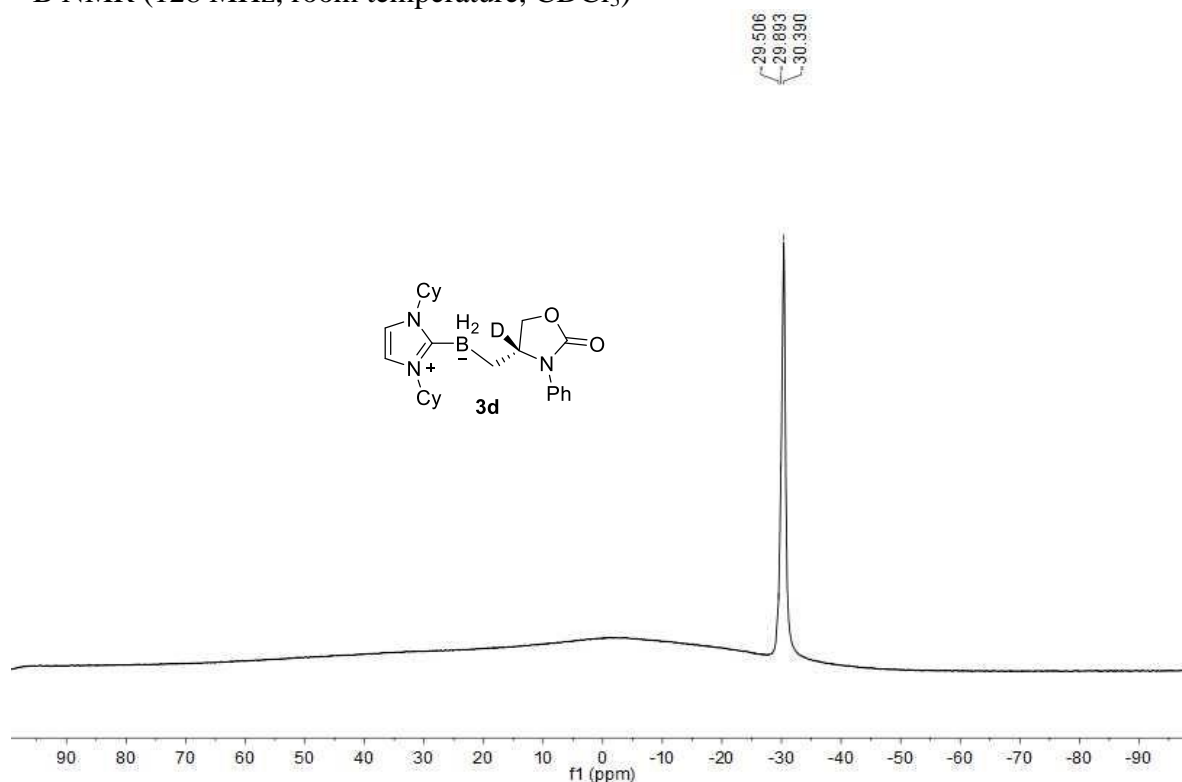

**Supplementary Figure 65.**  $^{11}\text{B}$  NMR spectrum of compound **3d**

HPLC spectrum of racemic **3d**

Tray# : 1  
Vial# : 10  
Data File : sql-7-74-1.lcd  
Method File : 4OD-H-85-0.5-214.lcm  
Date Acquired : 2/21/2022 7:56:42 PM  
Date Processed : 2/21/2022 8:27:39 PM

<Chromatogram View>

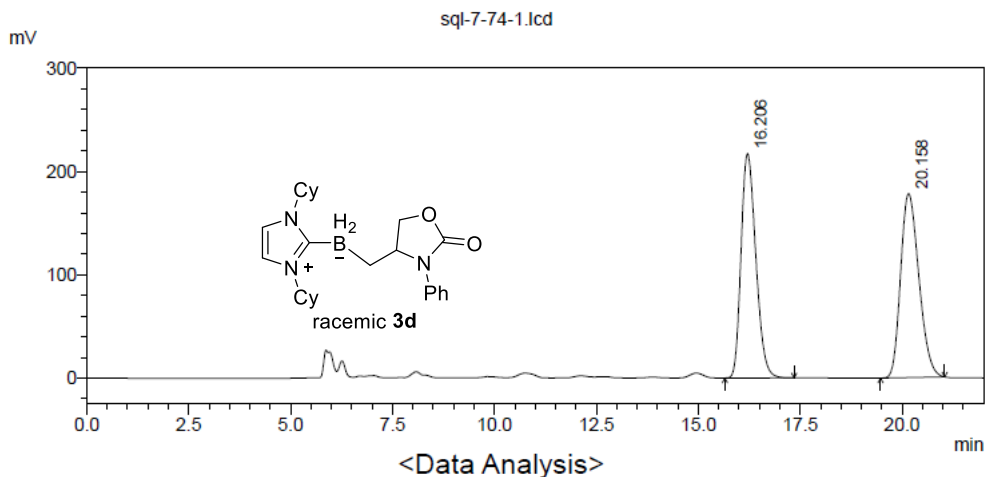

<Data Analysis>

| Peak # | Ret. Time | Height | Area     | Area%   |
|--------|-----------|--------|----------|---------|
| 1      | 16.206    | 217179 | 5470916  | 49.623  |
| 2      | 20.158    | 178045 | 5553977  | 50.377  |
| Total  |           | 395224 | 11024893 | 100.000 |

**Supplementary Figure 66.** HPLC spectrum of racemic **3d**

### HPLC spectrum of 3d

Sample Name :  
 Tray# : 1  
 Vial# : 11  
 Data File : sql-7-74-2.lcd  
 Method File : 40D-H-85-0.5-214.lcm  
 Date Acquired : 2/21/2022 7:32:04 PM  
 Date Processed : 2/21/2022 7:54:57 PM

<Chromatogram View>

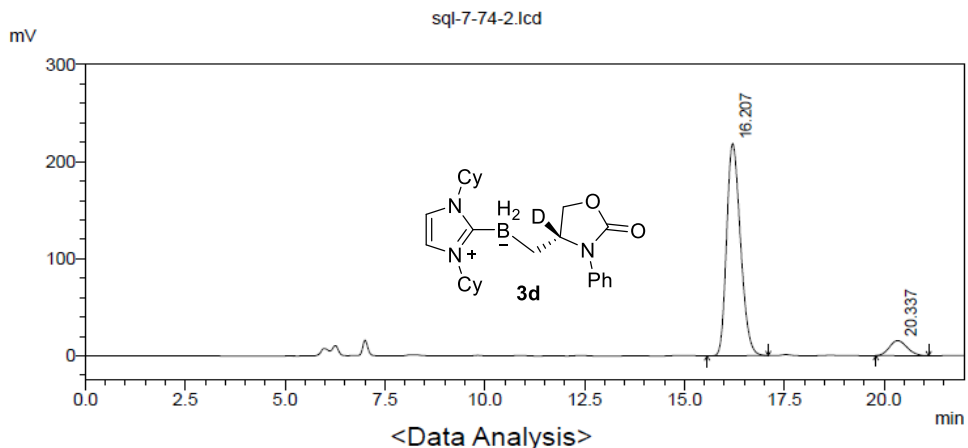

Detector A 214nm

| Peak # | Ret. Time | Height | Area    | Area%   |
|--------|-----------|--------|---------|---------|
| 1      | 16.207    | 218366 | 5275761 | 91.692  |
| 2      | 20.337    | 15537  | 478046  | 8.308   |
| Total  |           | 233903 | 5753807 | 100.000 |

### Supplementary Figure 67. HPLC spectrum of 3d

<sup>1</sup>H NMR (400 MHz, room temperature, CDCl<sub>3</sub>)

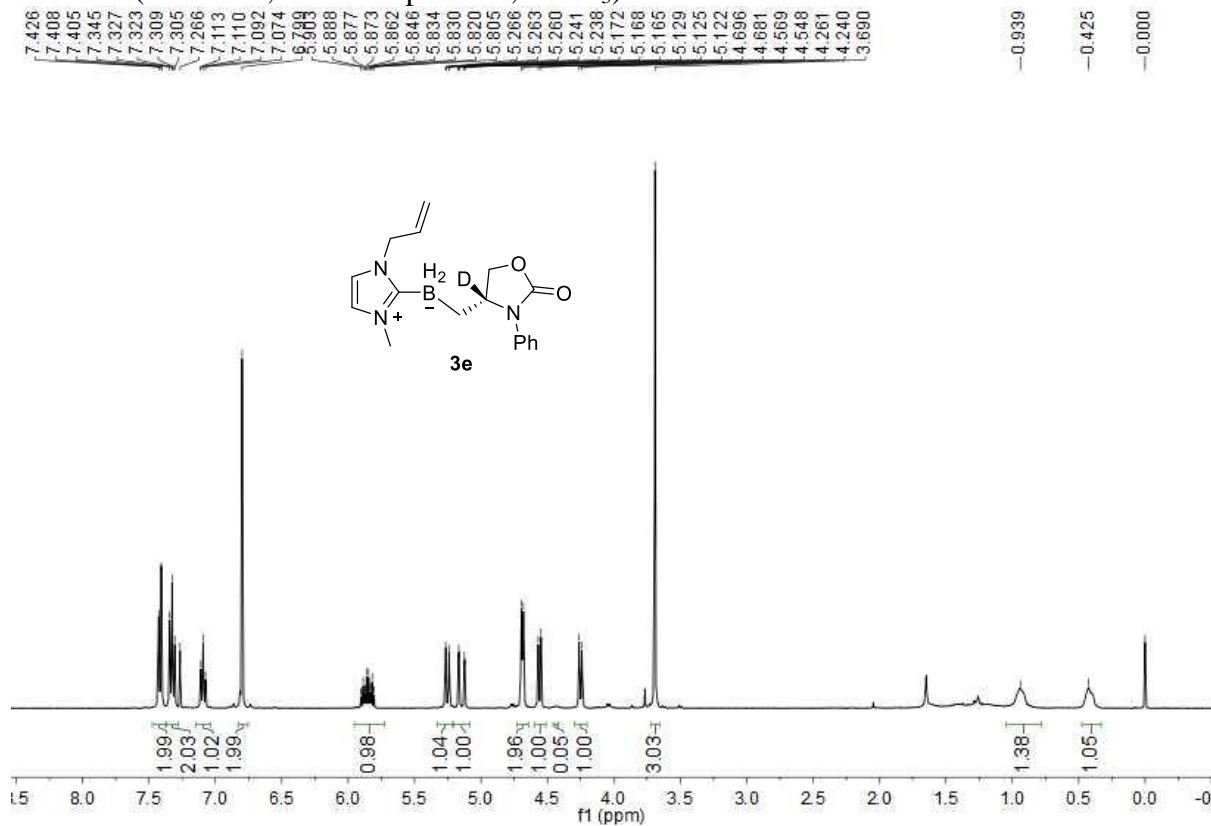

### Supplementary Figure 68. <sup>1</sup>H NMR spectrum of compound 3e

$^{13}\text{C}$  NMR (100 MHz, room temperature,  $\text{CDCl}_3$ )

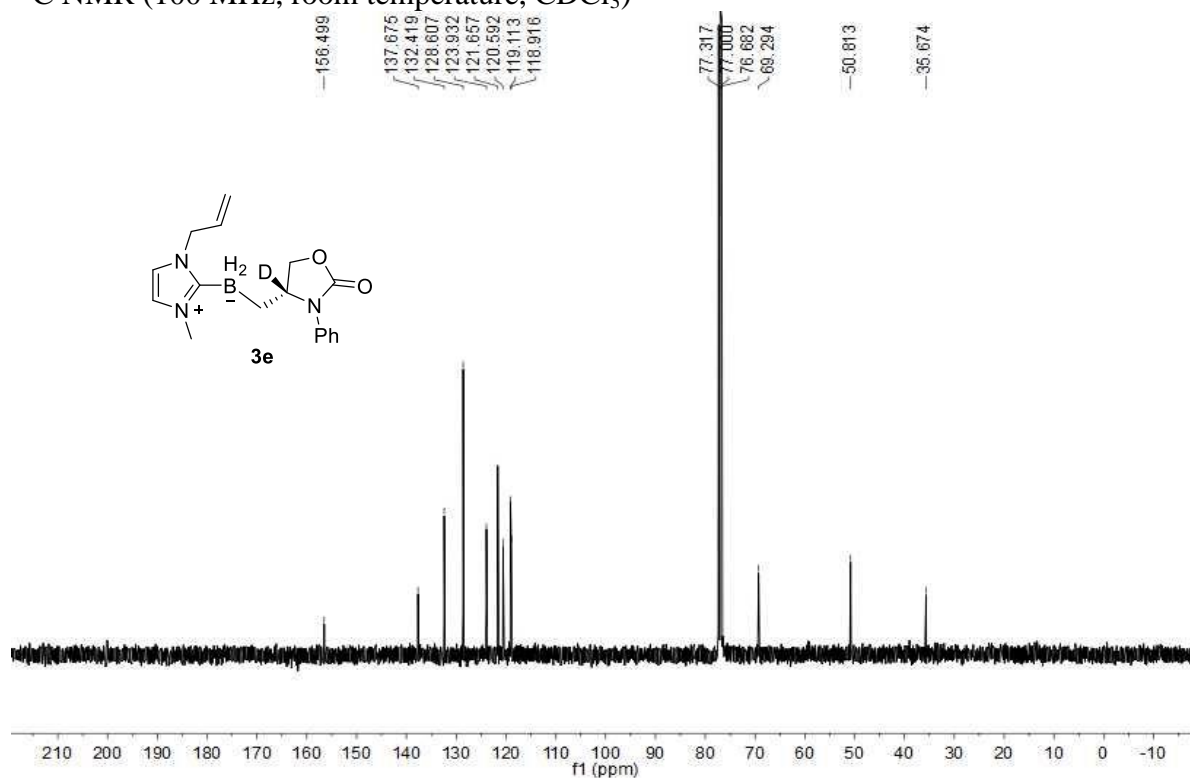

**Supplementary Figure 69.**  $^{13}\text{C}$  NMR spectrum of compound **3e**

$^{11}\text{B}$  NMR (128 MHz, room temperature,  $\text{CDCl}_3$ )

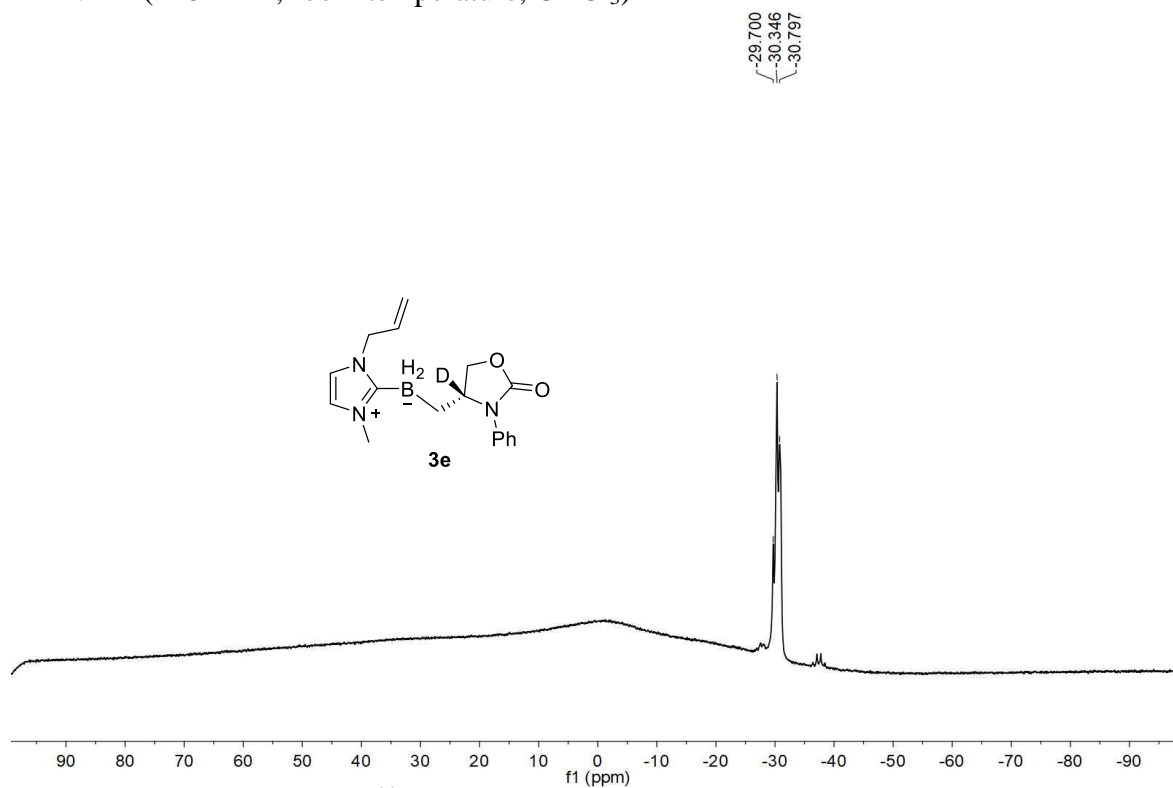

**Supplementary Figure 70.**  $^{11}\text{B}$  NMR spectrum of compound **3e**



### HPLC spectrum of racemic **3e**

Sample Name :  
 Tray# : 1  
 Vial# : 12  
 Data File : sql-7-73-1-1.lcd  
 Method File : 4OD-H-80-0.5-214.lcm  
 Date Acquired : 2/22/2022 2:17:55 PM  
 Date Processed : 2/22/2022 4:32:32 PM

<Chromatogram View>

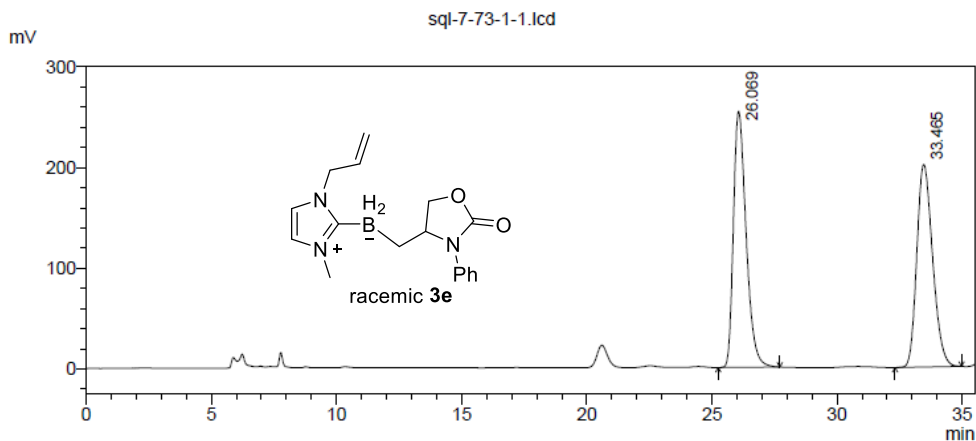

<Data Analysis>

| Detector A 214nm |           |        |          |         |
|------------------|-----------|--------|----------|---------|
| Peak #           | Ret. Time | Height | Area     | Area%   |
| 1                | 26.069    | 254307 | 8974856  | 50.360  |
| 2                | 33.465    | 201219 | 8846546  | 49.640  |
| Total            |           | 455526 | 17821402 | 100.000 |

### Supplementary Figure 71. HPLC spectrum of racemic **3e**

#### HPLC spectrum of **3e**

Sample Name :  
 Tray# : 1  
 Vial# : 20  
 Data File : sql-7-73-2-2.lcd  
 Method File : 4OD-H-80-0.5-214.lcm  
 Date Acquired : 2/21/2022 11:47:26 PM  
 Date Processed : 2/22/2022 9:11:31 AM

<Chromatogram View>

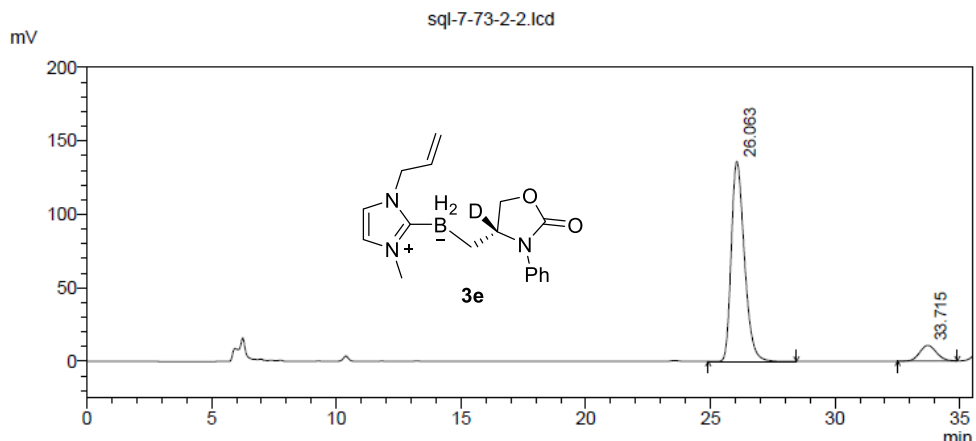

<Data Analysis>

| Detector A 214nm |           |        |         |         |
|------------------|-----------|--------|---------|---------|
| Peak #           | Ret. Time | Height | Area    | Area%   |
| 1                | 26.063    | 136222 | 4985968 | 91.048  |
| 2                | 33.715    | 10594  | 490244  | 8.952   |
| Total            |           | 146816 | 5476212 | 100.000 |

### Supplementary Figure 72. HPLC spectrum of **3e**

<sup>1</sup>H NMR (400 MHz, room temperature, CDCl<sub>3</sub>)

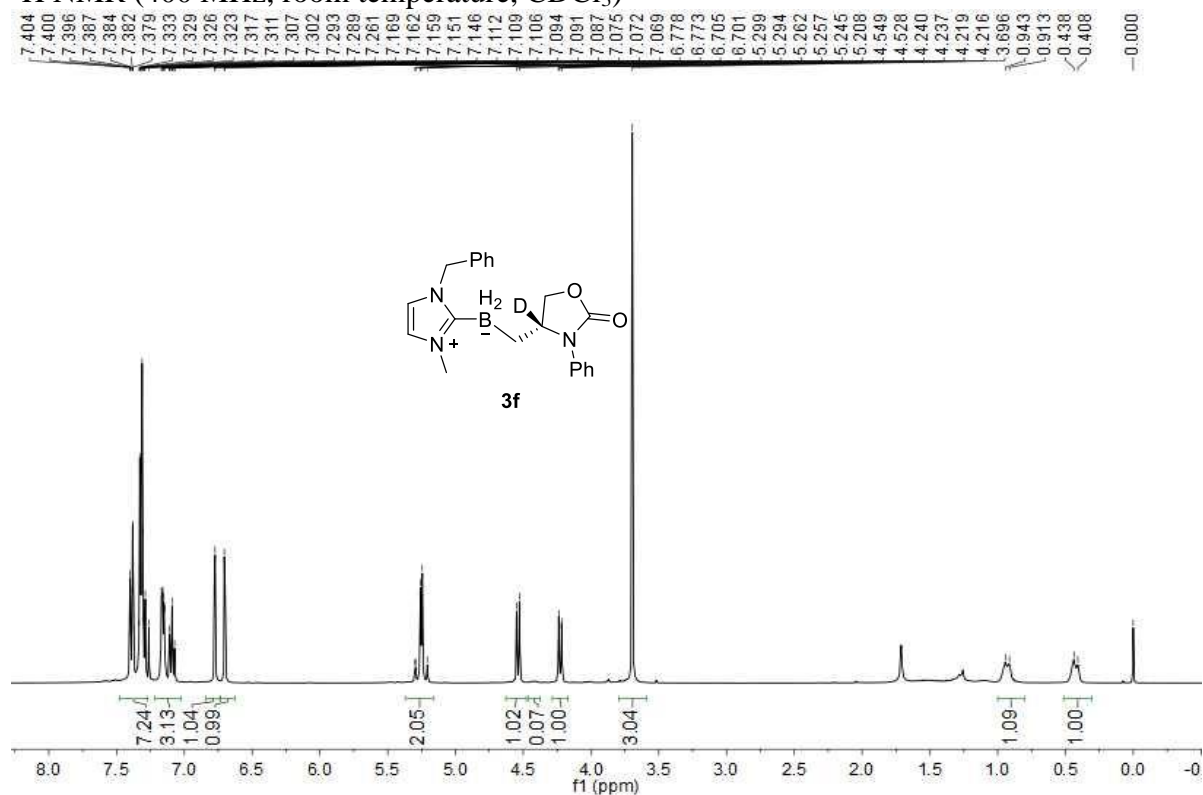

Supplementary Figure 73. <sup>1</sup>H NMR spectrum of compound **3f**

<sup>13</sup>C NMR (100 MHz, room temperature, CDCl<sub>3</sub>)

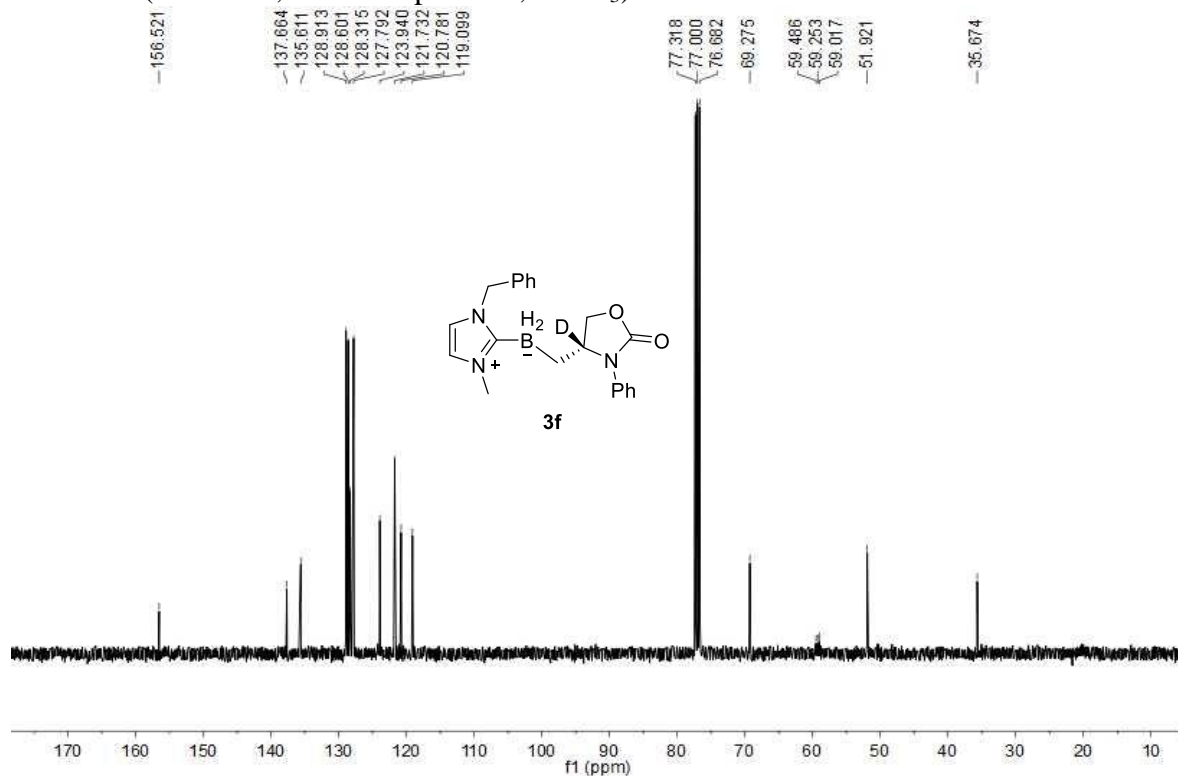

Supplementary Figure 74. <sup>13</sup>C NMR spectrum of compound **3f**

$^{11}\text{B}$  NMR (128 MHz, room temperature,  $\text{CDCl}_3$ )

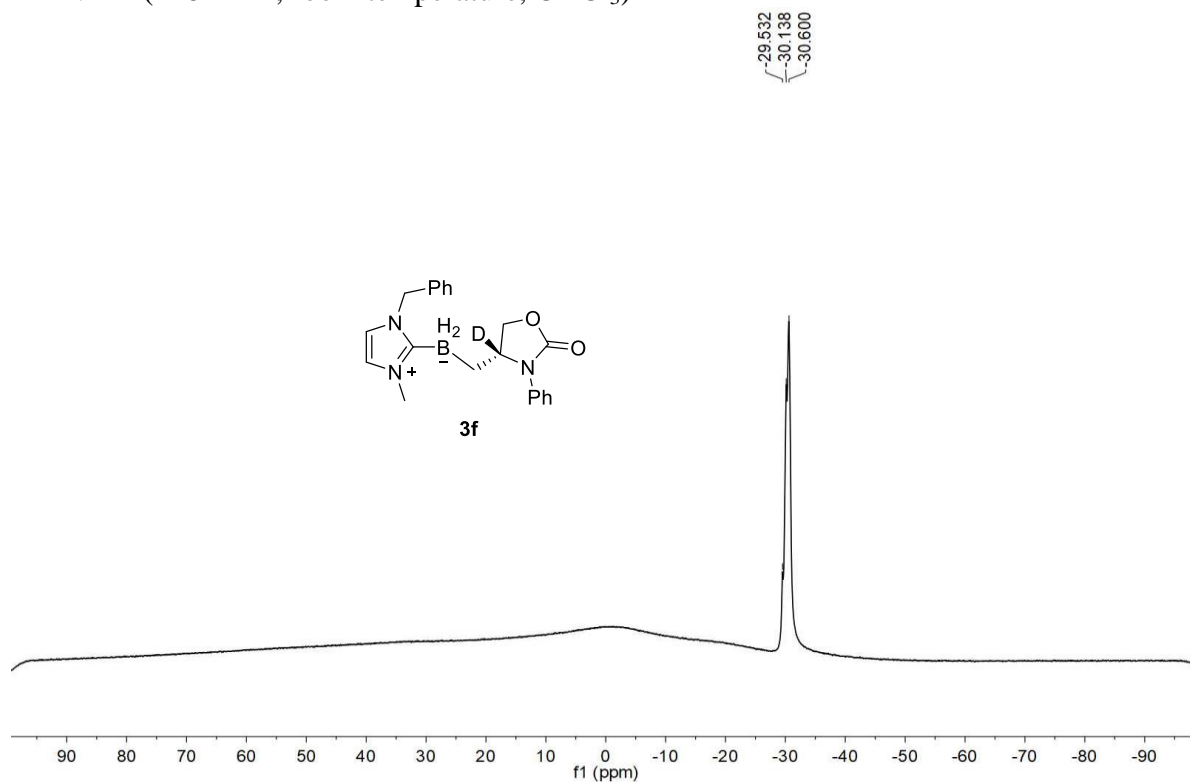

**Supplementary Figure 75.**  $^{11}\text{B}$  NMR spectrum of compound **3f**

HPLC spectrum of racemic **3f**

Tray# : 1  
Vial# : 11  
Data File : SQL-7-23-1-1-(6).lcd  
Method File : 4OD-H-60-1.0-214.lcm  
Date Acquired : 1/23/2022 8:28:50 AM  
Date Processed : 1/25/2022 12:47:09 AM

<Chromatogram View>

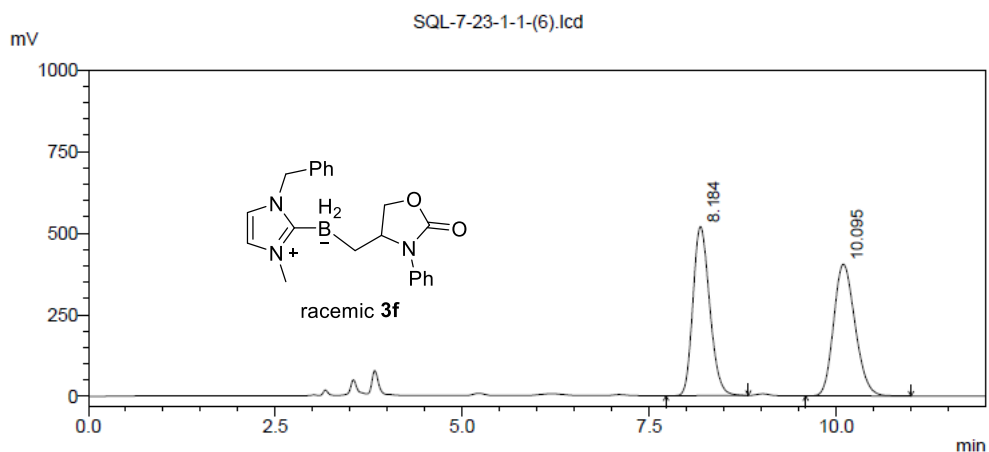

<Data Analysis>

| Detector A 214nm |           |        |          |         |
|------------------|-----------|--------|----------|---------|
| Pesk #           | Ret. Time | Height | Area     | Area%   |
| 1                | 8.184     | 518456 | 8079575  | 50.042  |
| 2                | 10.095    | 404174 | 8066099  | 49.958  |
| Total            |           | 922630 | 16145675 | 100.000 |

**Supplementary Figure 76.** HPLC spectrum of racemic **3f**

### HPLC spectrum of **3f**

Sample Name :  
 Tray# : 1  
 Vial# : 12  
 Data File : SQL-7-23-2-1-(6).lcd  
 Method File : 40D-H-60-1.0-214.lcm  
 Date Acquired : 1/23/2022 8:44:46 AM  
 Date Processed : 1/25/2022 12:46:57 AM

<Chromatogram View>

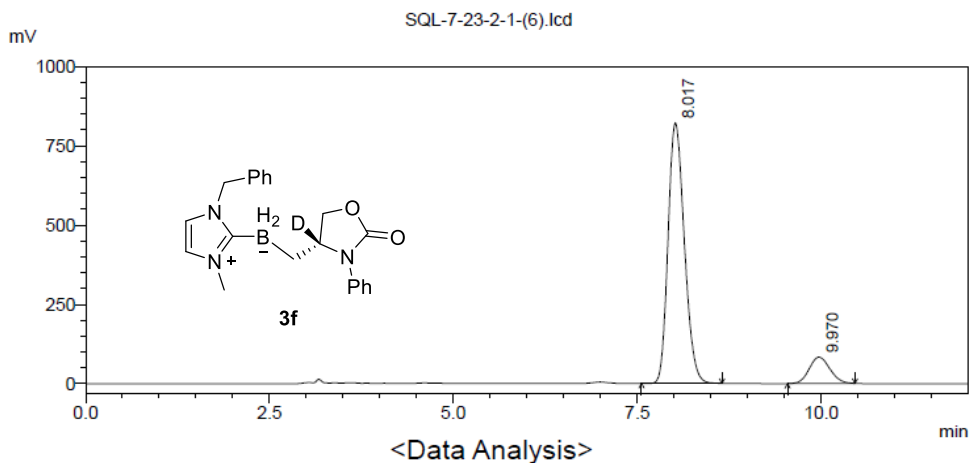

| Detector A 214nm |           |        |          |         |
|------------------|-----------|--------|----------|---------|
| Peak #           | Ret. Time | Height | Area     | Area%   |
| 1                | 8.017     | 822021 | 12674836 | 88.647  |
| 2                | 9.970     | 82970  | 1623241  | 11.353  |
| Total            |           | 904991 | 14298076 | 100.000 |

### Supplementary Figure 77. HPLC spectrum of **3f**

$^1\text{H}$  NMR (400 MHz, room temperature,  $\text{CDCl}_3$ )

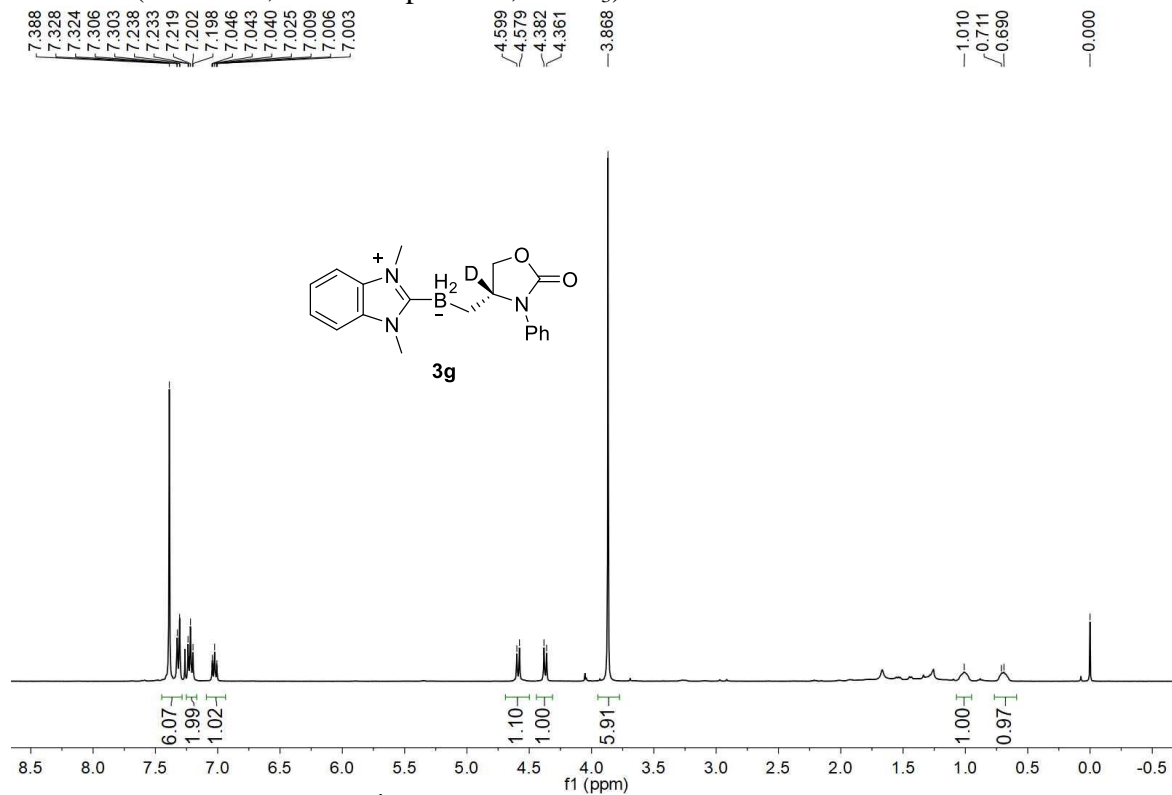

### Supplementary Figure 78. $^1\text{H}$ NMR spectrum of compound **3g**

$^{13}\text{C}$  NMR (100 MHz, room temperature,  $\text{CDCl}_3$ )

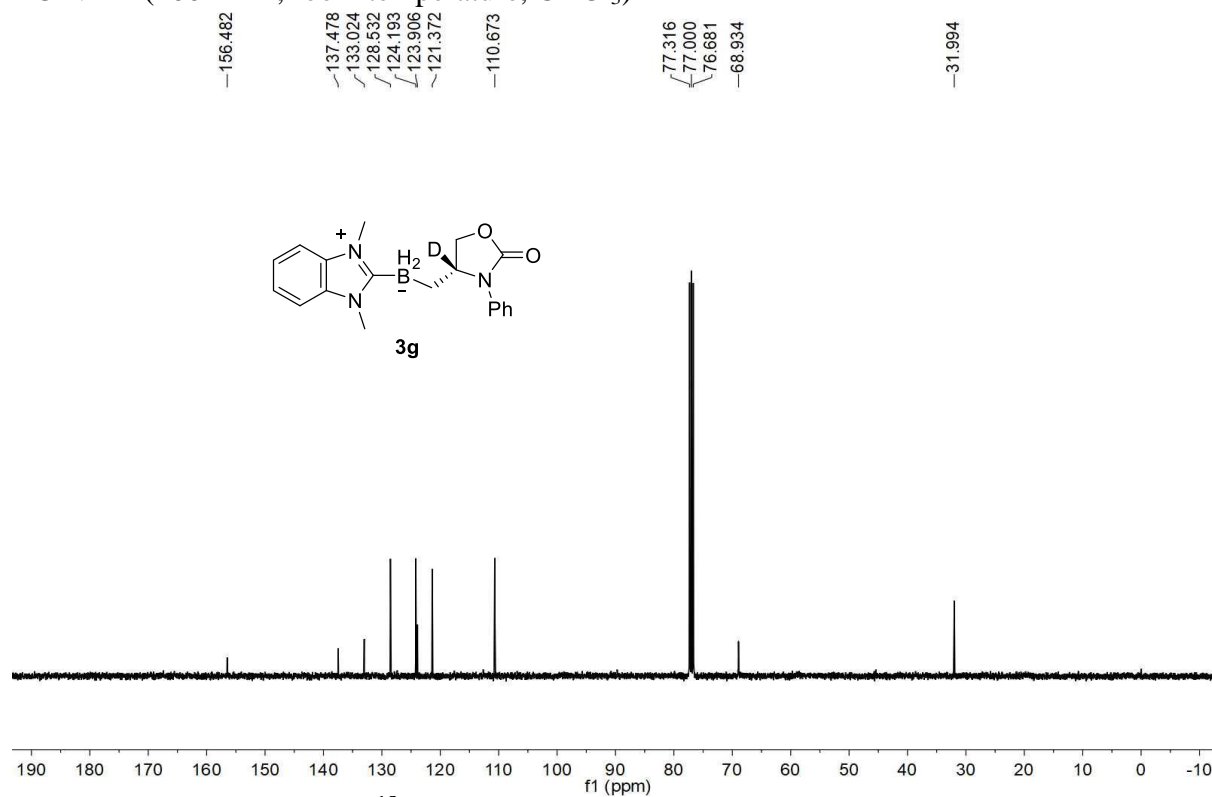

**Supplementary Figure 79.**  $^{13}\text{C}$  NMR spectrum of compound **3g**

$^{11}\text{B}$  NMR (128 MHz, room temperature,  $\text{CDCl}_3$ )

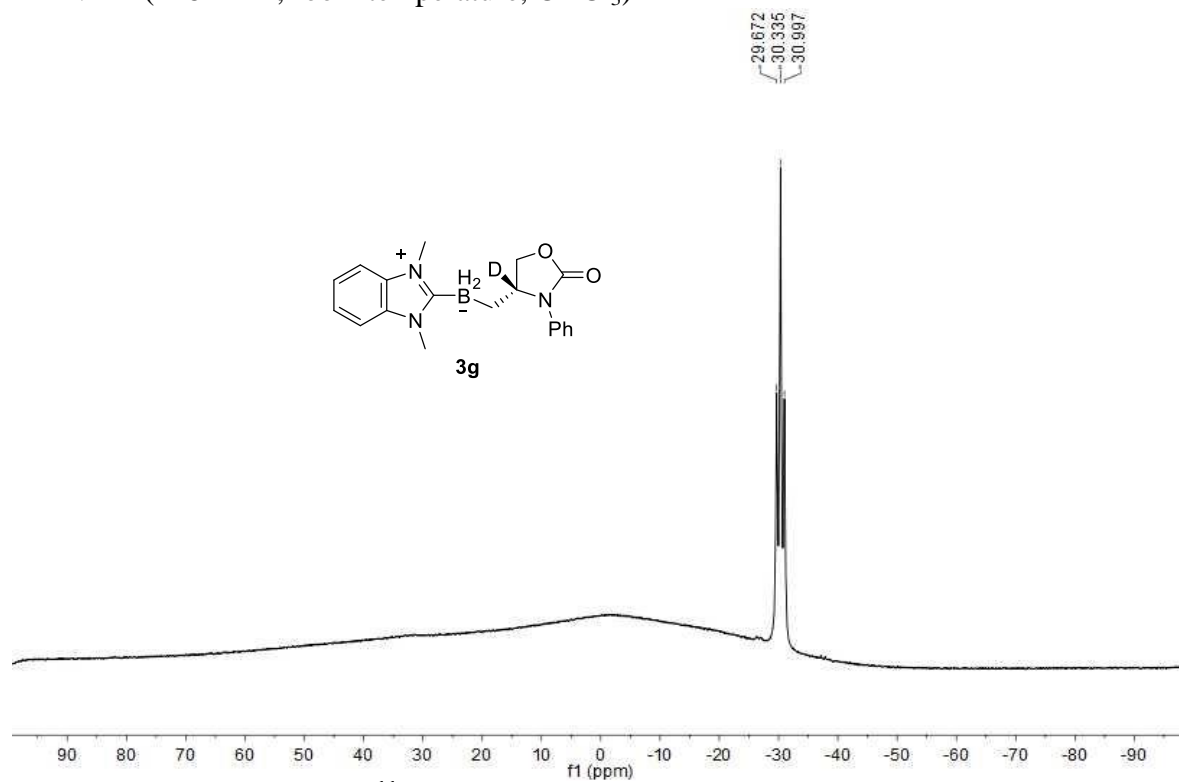

**Supplementary Figure 80.**  $^{11}\text{B}$  NMR spectrum of compound **3g**

### HPLC spectrum of racemic **3g**

Tray# : 1  
 Vial# : 11  
 Data File : sql-6-360-1-4-CHIRAL-(5).lcd  
 Method File : 4OD-H-70-0.5-214.lcm  
 Date Acquired : 1/7/2022 4:50:51 PM  
 Date Processed : 1/25/2022 12:43:05 AM

<Chromatogram View>

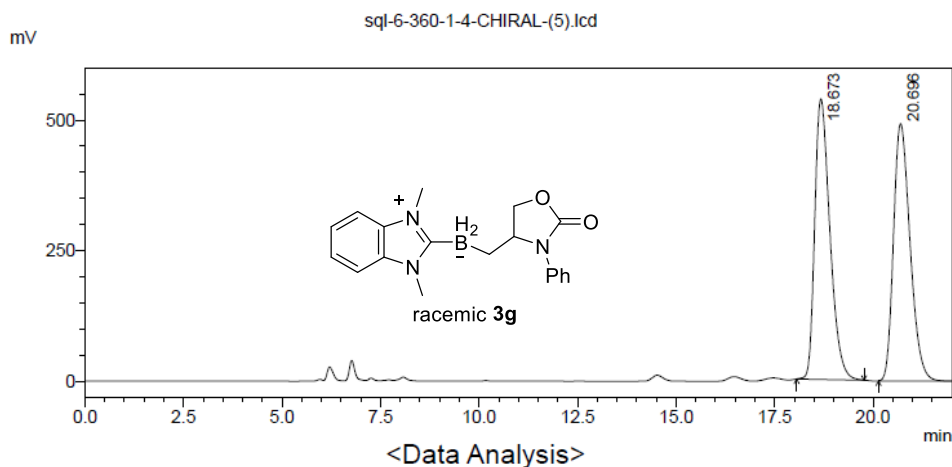

| Detector A 214nm |           |         |          |         |
|------------------|-----------|---------|----------|---------|
| Peak #           | Ret. Time | Height  | Area     | Area%   |
| 1                | 18.673    | 537145  | 14398686 | 49.984  |
| 2                | 20.696    | 492652  | 14407750 | 50.016  |
| Total            |           | 1029797 | 28806437 | 100.000 |

### Supplementary Figure 81. HPLC spectrum of racemic **3g**

### HPLC spectrum of **3g**

Tray# : 1  
 Vial# : 10  
 Data File : sql-6-360-2-1-CHIRAL-(5).lcd  
 Method File : 4OD-H-70-0.5-214.lcm  
 Date Acquired : 1/7/2022 5:16:57 PM  
 Date Processed : 1/25/2022 12:43:42 AM

<Chromatogram View>

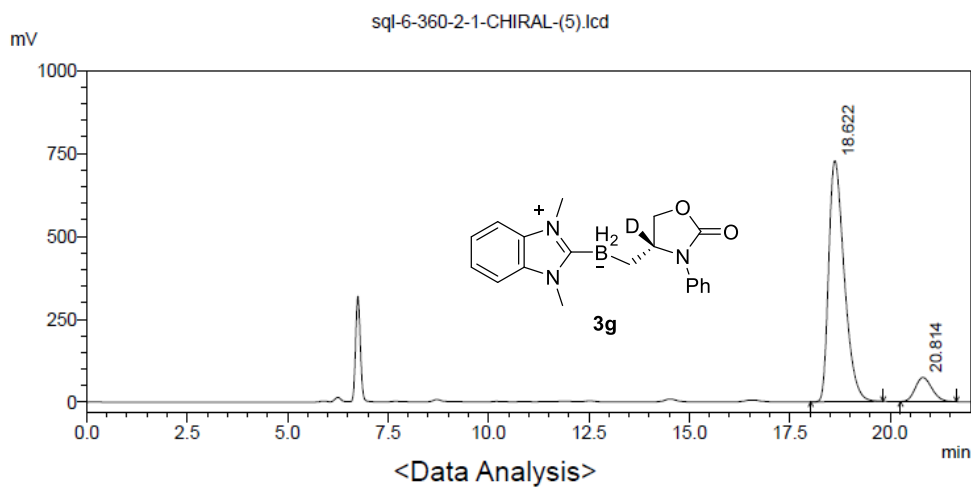

| Detector A 214nm |           |        |          |         |
|------------------|-----------|--------|----------|---------|
| Peak #           | Ret. Time | Height | Area     | Area%   |
| 1                | 18.622    | 727839 | 19663686 | 90.293  |
| 2                | 20.814    | 73038  | 2114051  | 9.707   |
| Total            |           | 800877 | 21777737 | 100.000 |

### Supplementary Figure 82. HPLC spectrum of **3g**

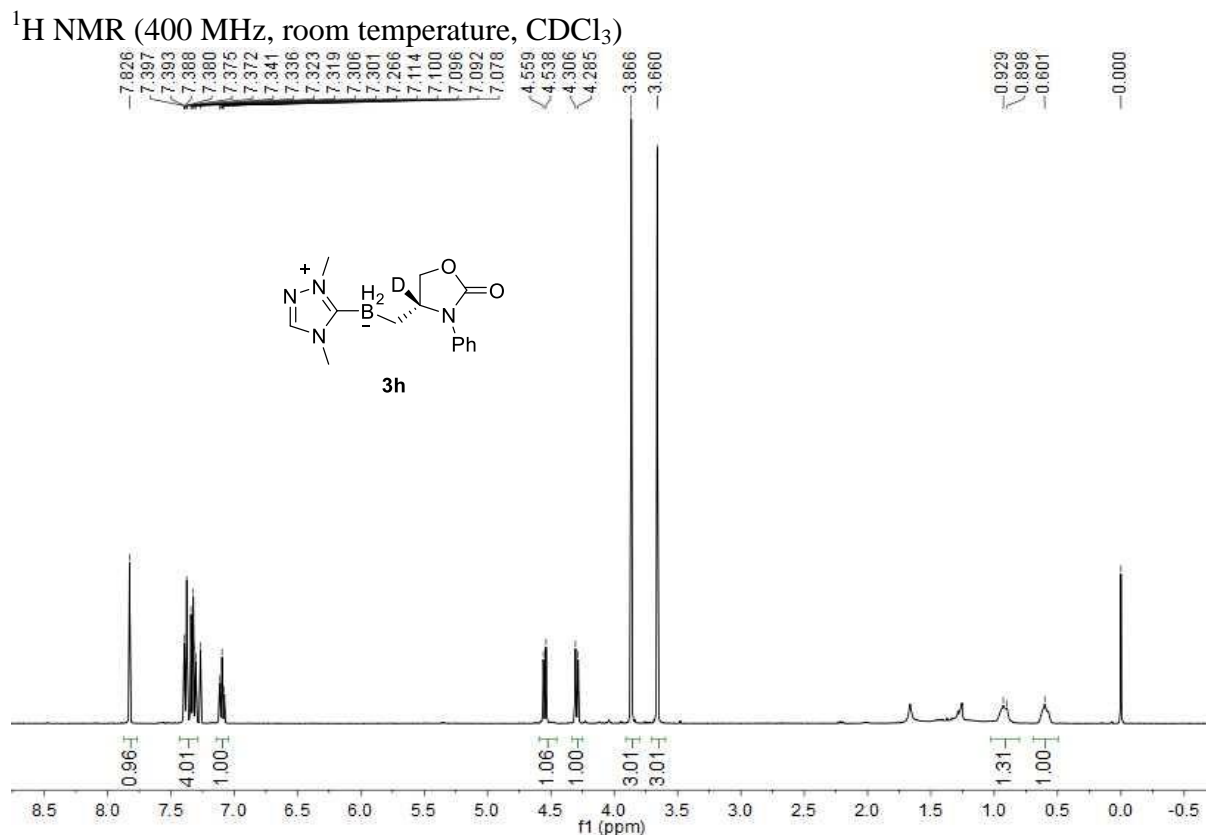

**Supplementary Figure 83.** <sup>1</sup>H NMR spectrum of compound **3h**

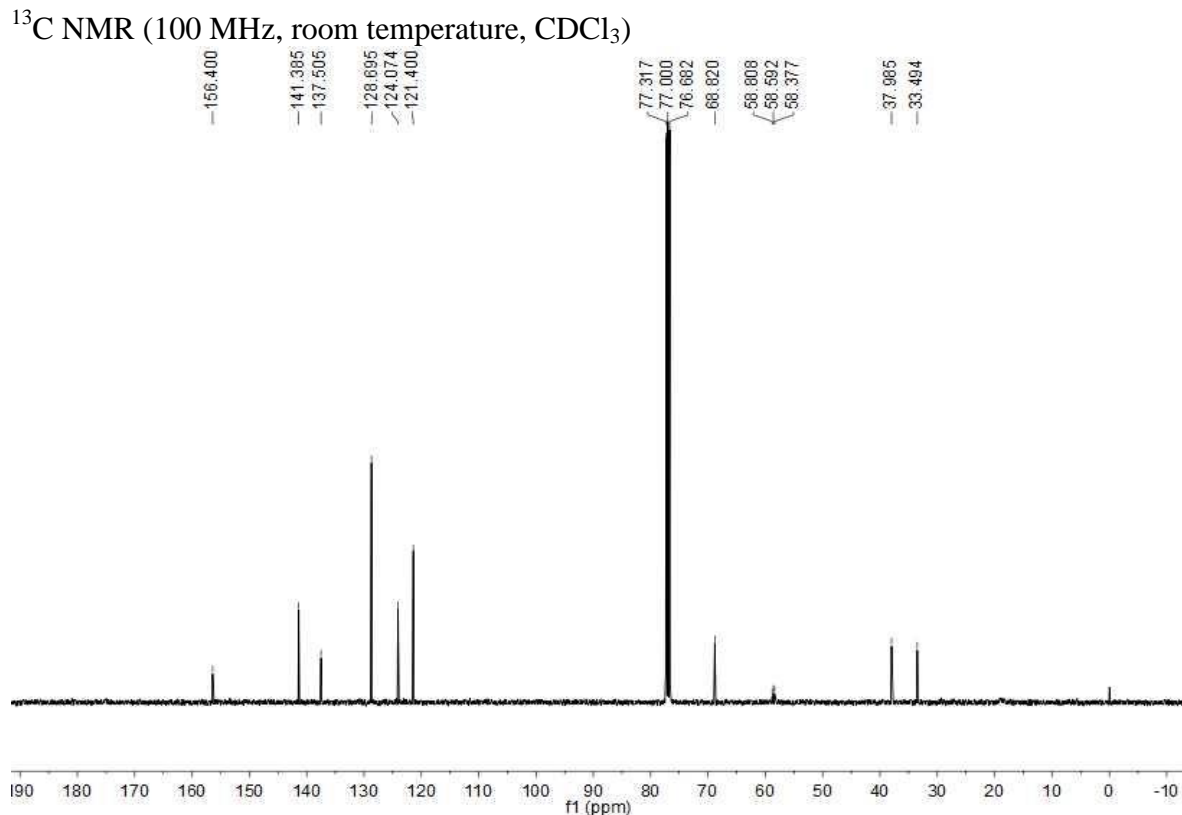

**Supplementary Figure 84.** <sup>13</sup>C NMR spectrum of compound **3h**

$^{11}\text{B}$  NMR (128 MHz, room temperature,  $\text{CDCl}_3$ )

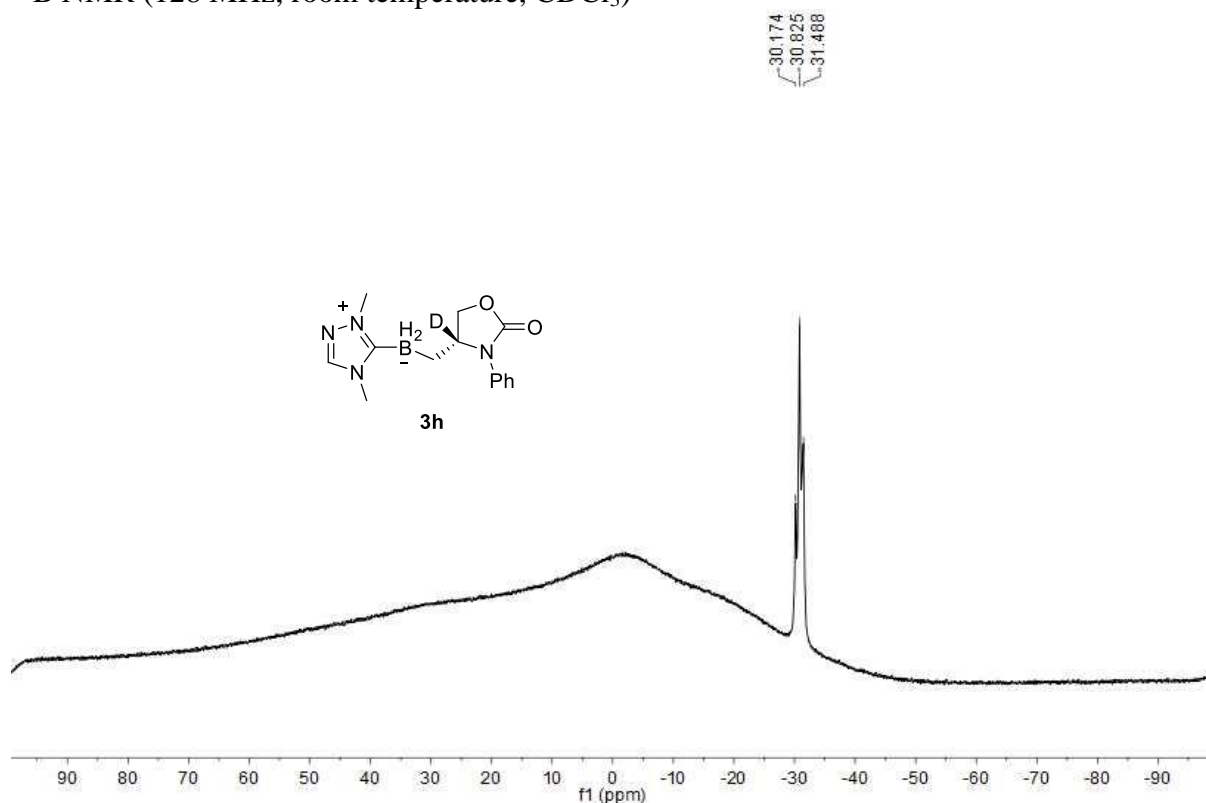

**Supplementary Figure 85.**  $^{11}\text{B}$  NMR spectrum of compound **3h**

HPLC spectrum of racemic **3h**

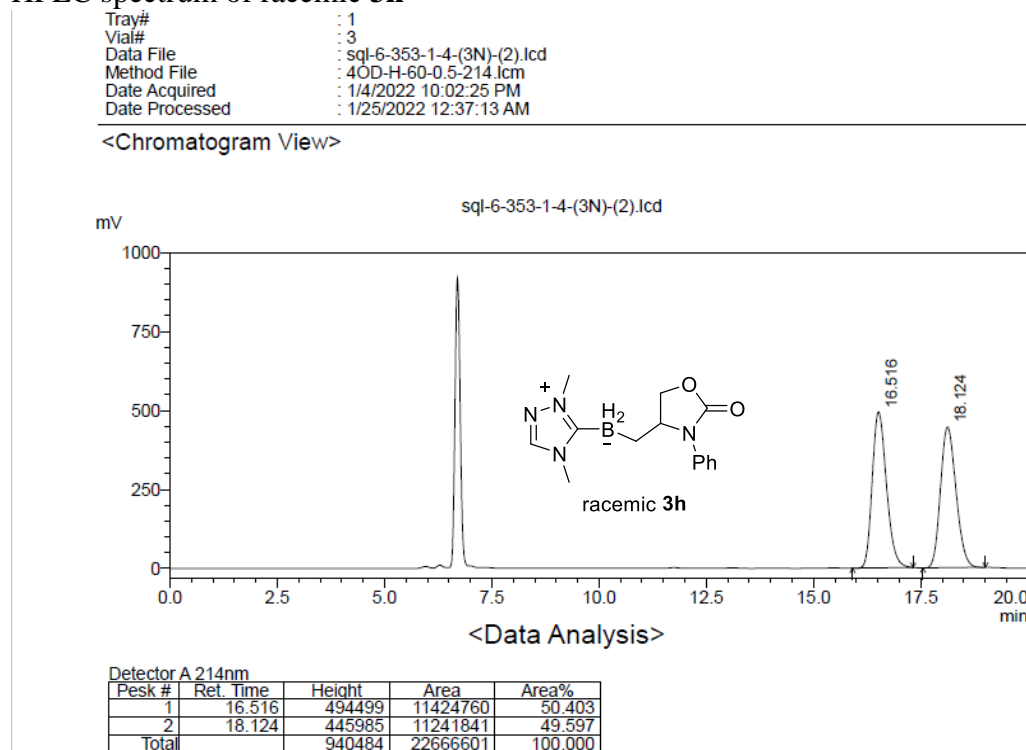

**Supplementary Figure 86.** HPLC spectrum of racemic **3h**



### HPLC spectrum of **3h**

Vial# : 10  
 Data File : sql-6-353-2-(3N)-CHIRAL-(2).lcd  
 Method File : 4OD-H-60-0.5-214.lcm  
 Date Acquired : 1/4/2022 11:34:10 PM  
 Date Processed : 1/25/2022 12:37:49 AM

<Chromatogram View>

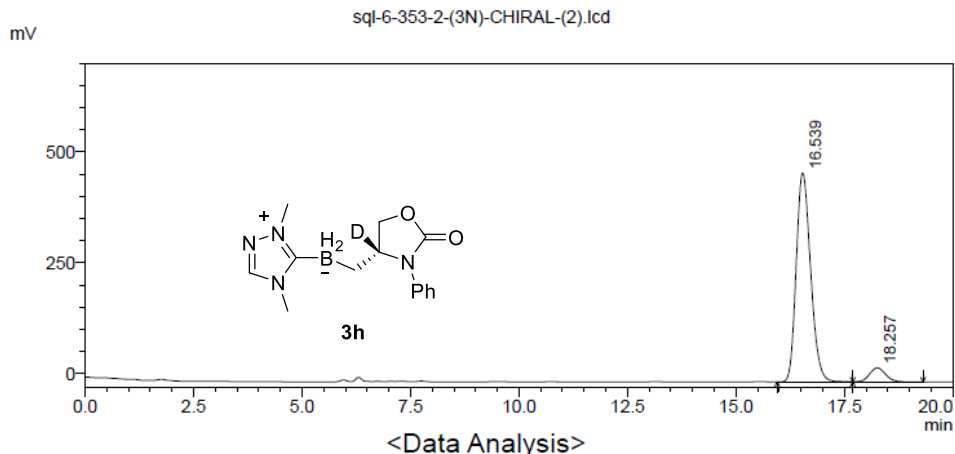

Detector A 214nm

| Peak # | Ret. Time | Height | Area     | Area%   |
|--------|-----------|--------|----------|---------|
| 1      | 16.539    | 471492 | 10889523 | 93.002  |
| 2      | 18.257    | 31608  | 819411   | 6.998   |
| Total  |           | 503100 | 11708934 | 100.000 |

### Supplementary Figure 87. HPLC spectrum of **3h**

<sup>1</sup>H NMR (400 MHz, room temperature, CDCl<sub>3</sub>)

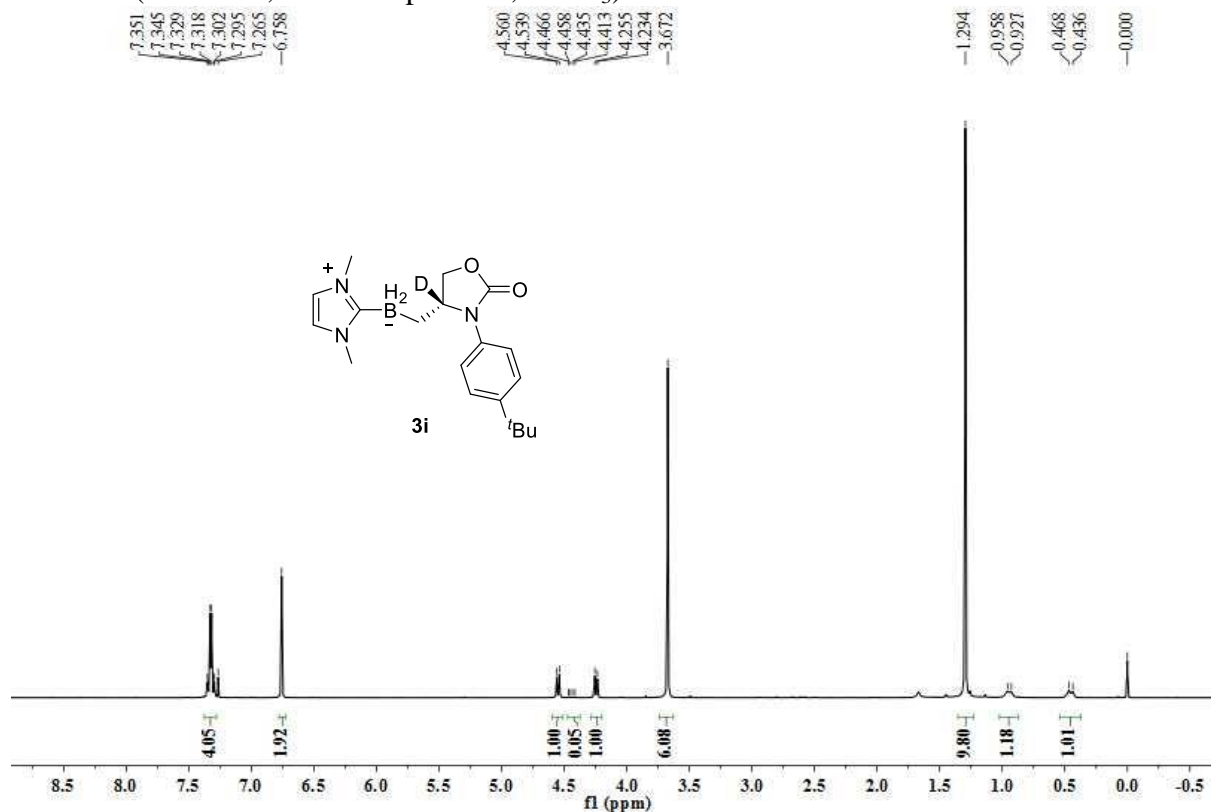

### Supplementary Figure 88. <sup>1</sup>H NMR spectrum of compound **3i**

$^{13}\text{C}$  NMR (100 MHz, room temperature,  $\text{CDCl}_3$ )

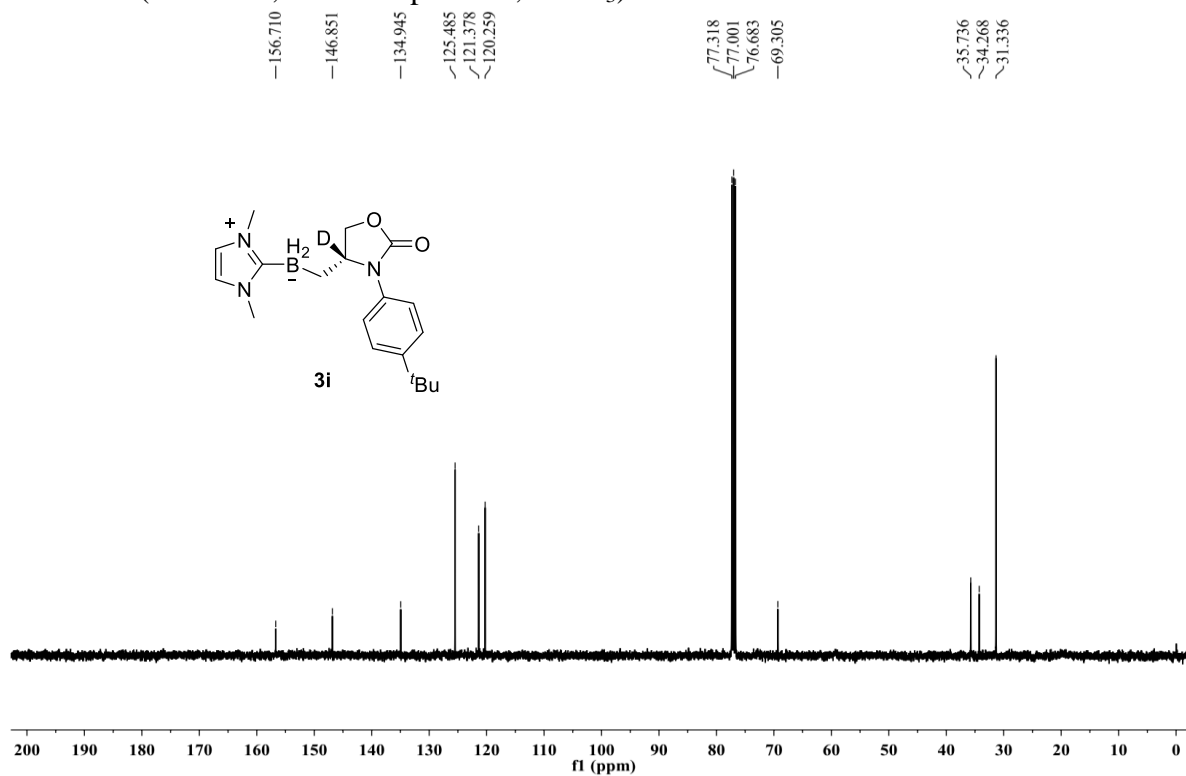

**Supplementary Figure 89.**  $^{13}\text{C}$  NMR spectrum of compound **3i**

$^{11}\text{B}$  NMR (128 MHz, room temperature,  $\text{CDCl}_3$ )

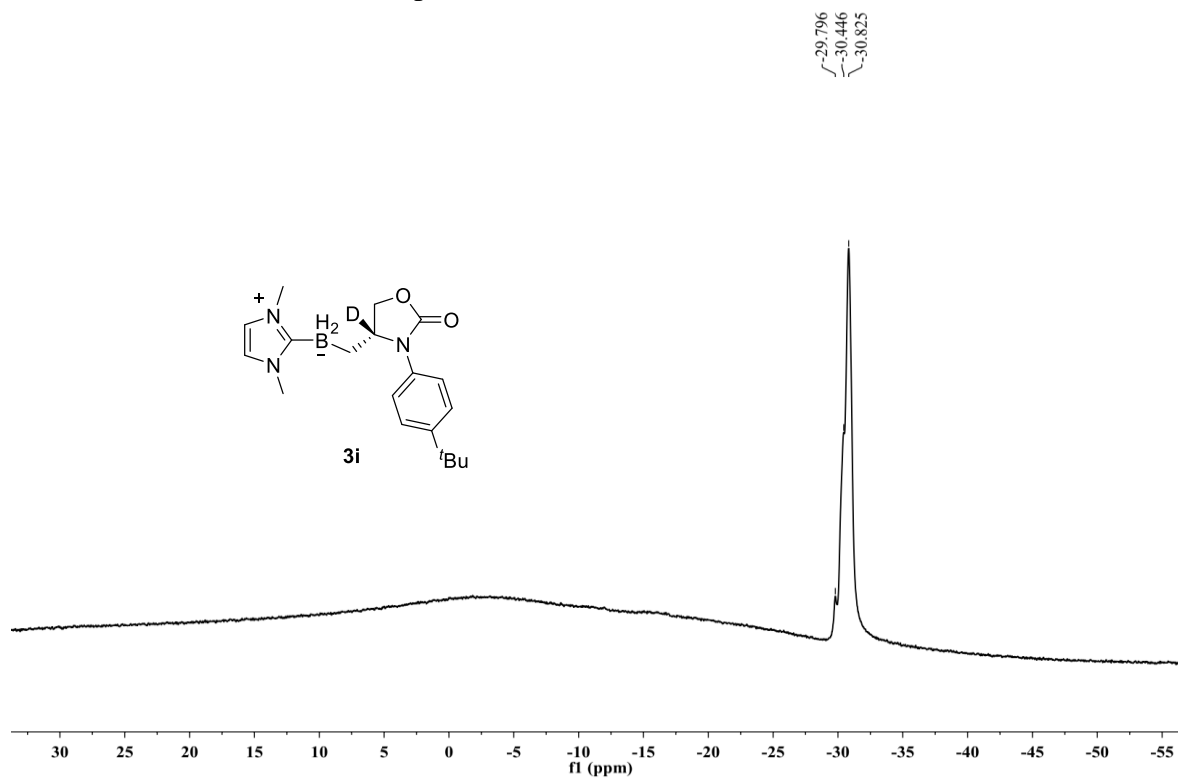

**Supplementary Figure 90.**  $^{11}\text{B}$  NMR spectrum of compound **3i**

### HPLC spectrum of racemic **3i**

Tray# : 1  
 Vial# : 46  
 Data File : XMC-4-327A-3-3.lcd  
 Method File : 3AD-H-85-1-214.lcm  
 Date Acquired : 2/11/2022 2:34:15 PM  
 Date Processed : 2/11/2022 3:52:34 PM

<Chromatogram View>

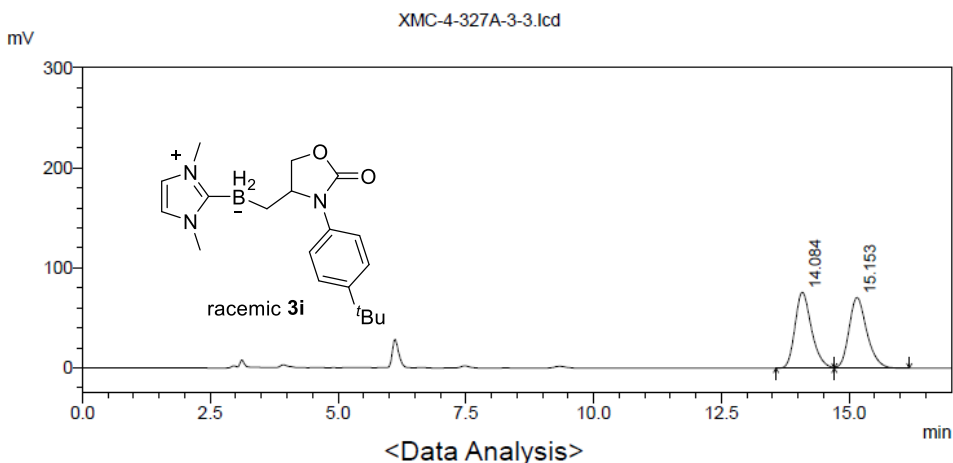

Detector A 214nm

| Peak # | Ret. Time | Height | Area    | Area%   |
|--------|-----------|--------|---------|---------|
| 1      | 14.084    | 75980  | 1709516 | 49.898  |
| 2      | 15.153    | 70633  | 1716478 | 50.102  |
| Total  |           | 146613 | 3425994 | 100.000 |

### Supplementary Figure 91. HPLC spectrum of racemic **3i**

### HPLC spectrum of **3i**

Sample Name :  
 Tray# : 1  
 Vial# : 47  
 Data File : XMC-4-327b-1.lcd  
 Method File : 3AD-H-85-1-214.lcm  
 Date Acquired : 2/11/2022 2:54:07 PM  
 Date Processed : 2/11/2022 3:53:58 PM

<Chromatogram View>

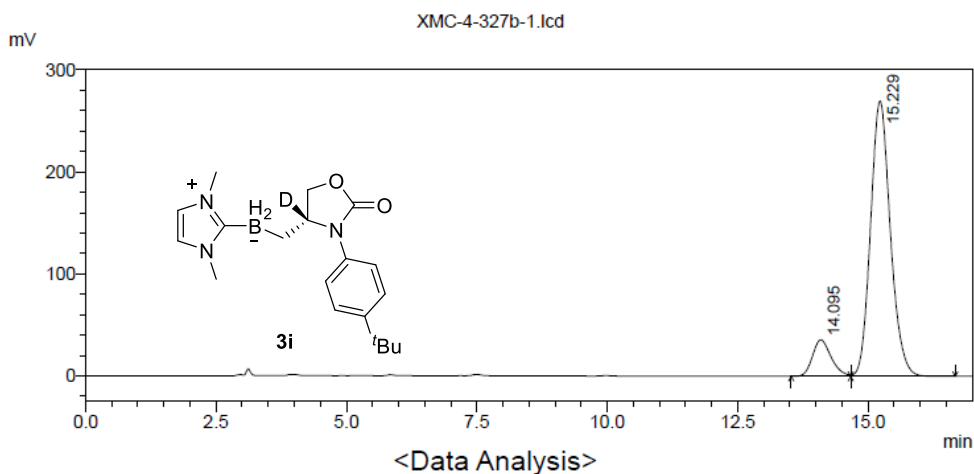

Detector A 214nm

| Peak # | Ret. Time | Height | Area    | Area%   |
|--------|-----------|--------|---------|---------|
| 1      | 14.095    | 35648  | 886744  | 11.051  |
| 2      | 15.229    | 269809 | 7137628 | 88.949  |
| Total  |           | 305457 | 8024372 | 100.000 |

### Supplementary Figure 92. HPLC spectrum of **3i**

$^1\text{H}$  NMR (400 MHz, room temperature,  $\text{CDCl}_3$ )

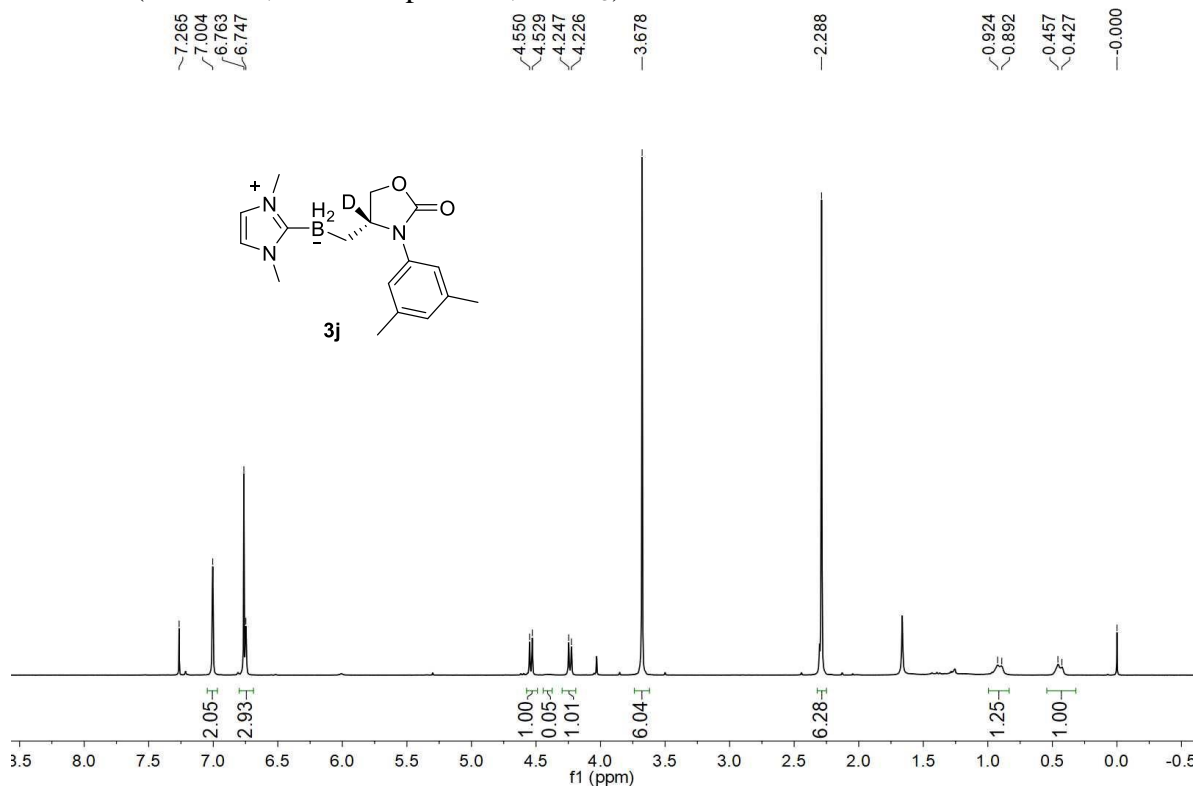

**Supplementary Figure 93.**  $^1\text{H}$  NMR spectrum of compound **3j**

$^{13}\text{C}$  NMR (100 MHz, room temperature,  $\text{CDCl}_3$ )

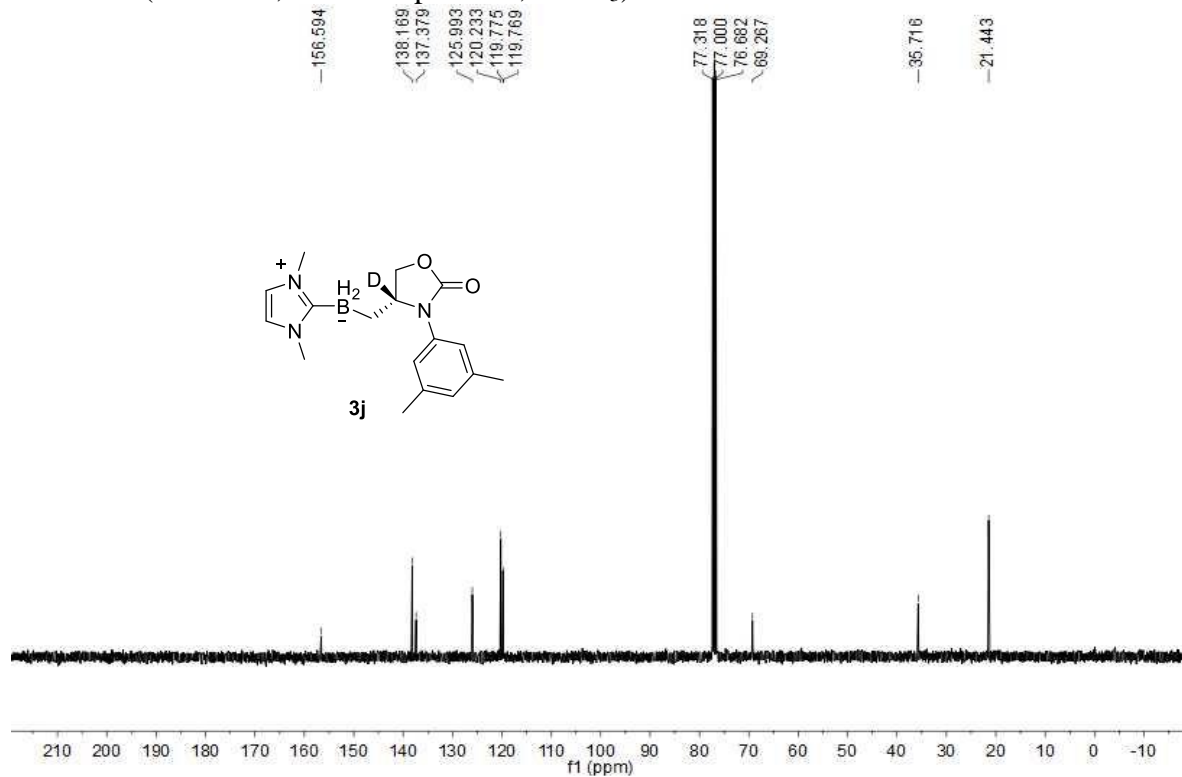

**Supplementary Figure 94.**  $^{13}\text{C}$  NMR spectrum of compound **3j**

$^{11}\text{B}$  NMR (128 MHz, room temperature,  $\text{CDCl}_3$ )

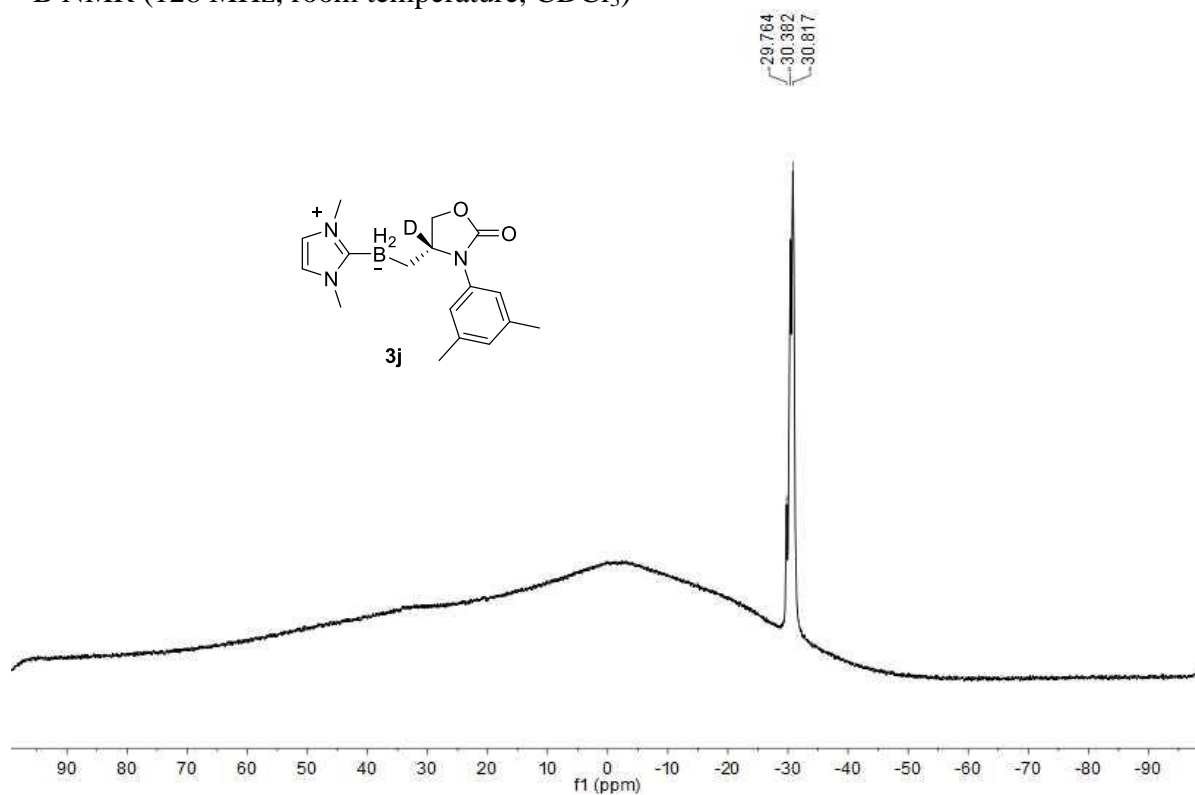

**Supplementary Figure 95.**  $^{11}\text{B}$  NMR spectrum of compound **3j**

HPLC spectrum of racemic **3j**

Tray# : 1  
Vial# : 20  
Data File : sql-6-405-1-1-(11).lcd  
Method File : 4OD-H-60-0.5-214.lcm  
Date Acquired : 1/19/2022 12:09:04 AM  
Date Processed : 1/25/2022 1:18:26 AM

<Chromatogram View>

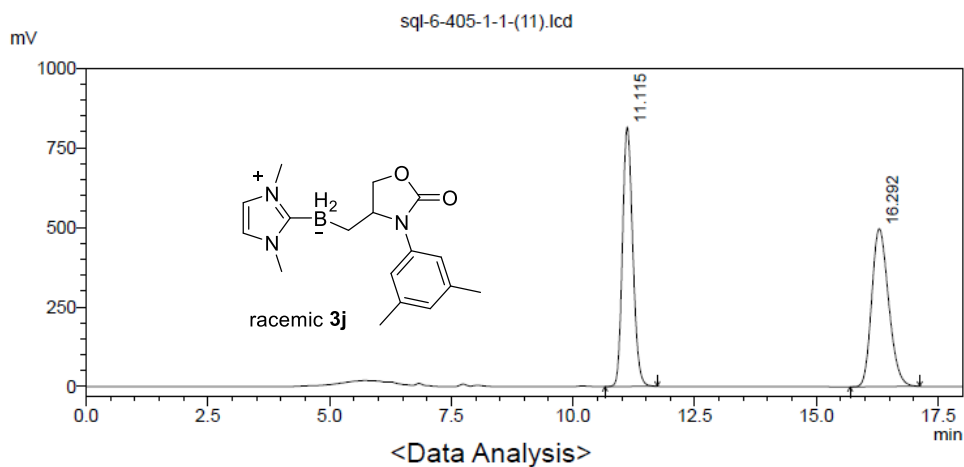

<Data Analysis>

| Pesk # | Ret. Time | Height  | Area     | Area%   |
|--------|-----------|---------|----------|---------|
| 1      | 11.115    | 815076  | 11988374 | 49.950  |
| 2      | 16.292    | 496312  | 12012280 | 50.050  |
| Total  |           | 1311388 | 24000653 | 100.000 |

**Supplementary Figure 96.** HPLC spectrum of racemic **3j**

### HPLC spectrum of **3j**

Tray# : 1  
 Vial# : 21  
 Data File : sql-6-405-2-(11).lcd  
 Method File : 4OD-H-60-0.5-214.lcm  
 Date Acquired : 1/18/2022 11:48:30 PM  
 Date Processed : 1/25/2022 1:19:16 AM

<Chromatogram View>

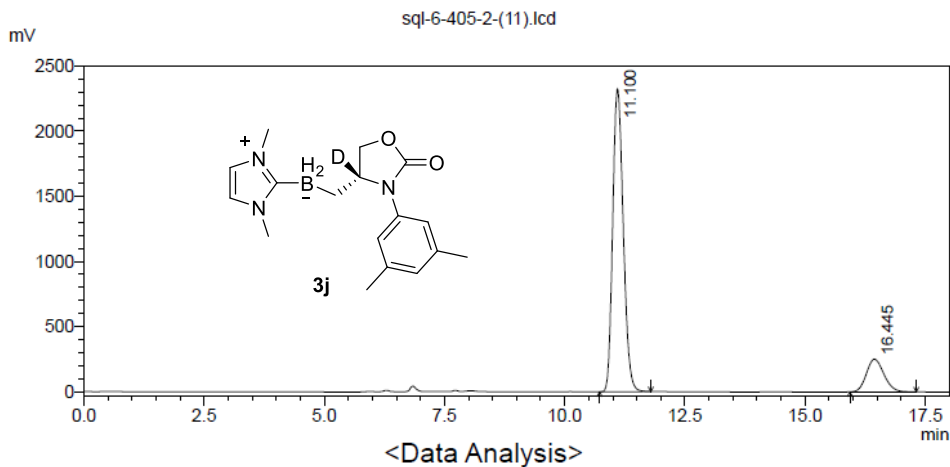

| Detector A 214nm |           |         |          |         |
|------------------|-----------|---------|----------|---------|
| Peak #           | Ret. Time | Height  | Area     | Area%   |
| 1                | 11.100    | 2324860 | 35582622 | 84.809  |
| 2                | 16.445    | 251081  | 6373788  | 15.191  |
| Total            |           | 2575940 | 41956410 | 100.000 |

### Supplementary Figure 97. HPLC spectrum of **3j**

<sup>1</sup>H NMR (400 MHz, room temperature, CDCl<sub>3</sub>)

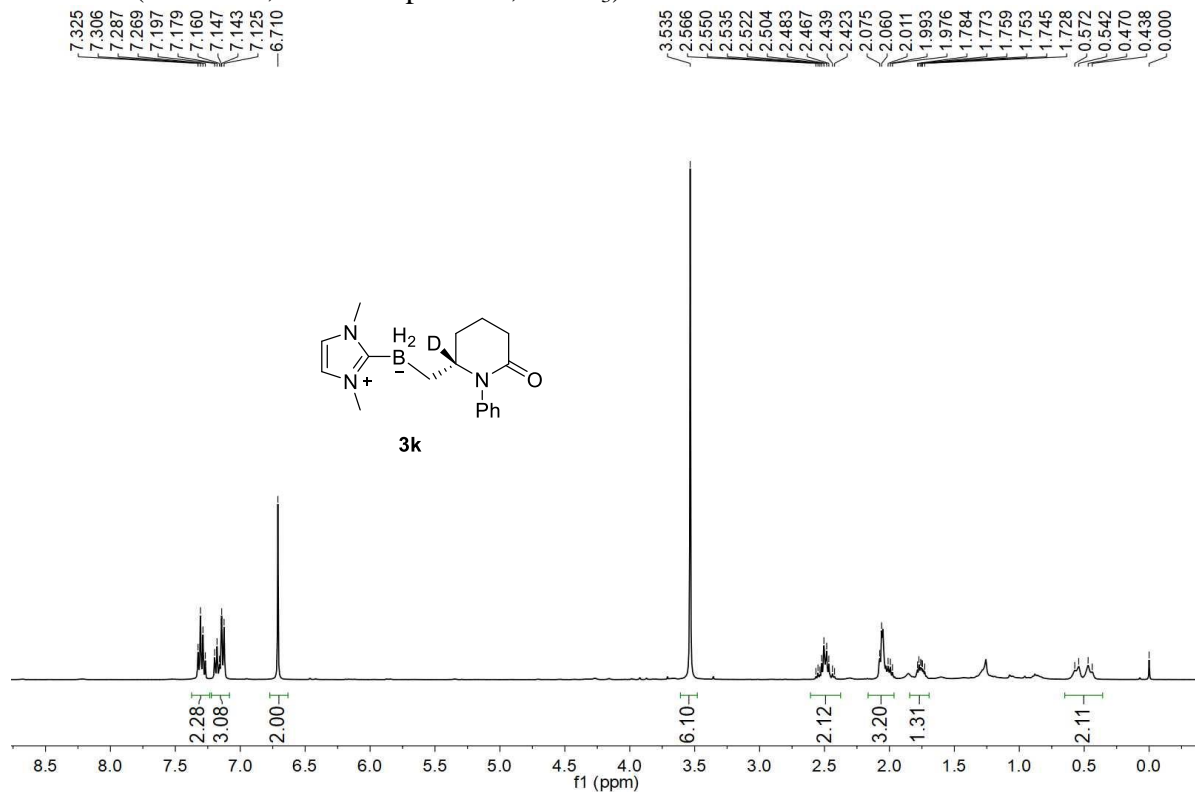

### Supplementary Figure 98. <sup>1</sup>H NMR spectrum of compound **3k**

$^{13}\text{C}$  NMR (100 MHz, room temperature,  $\text{CDCl}_3$ )

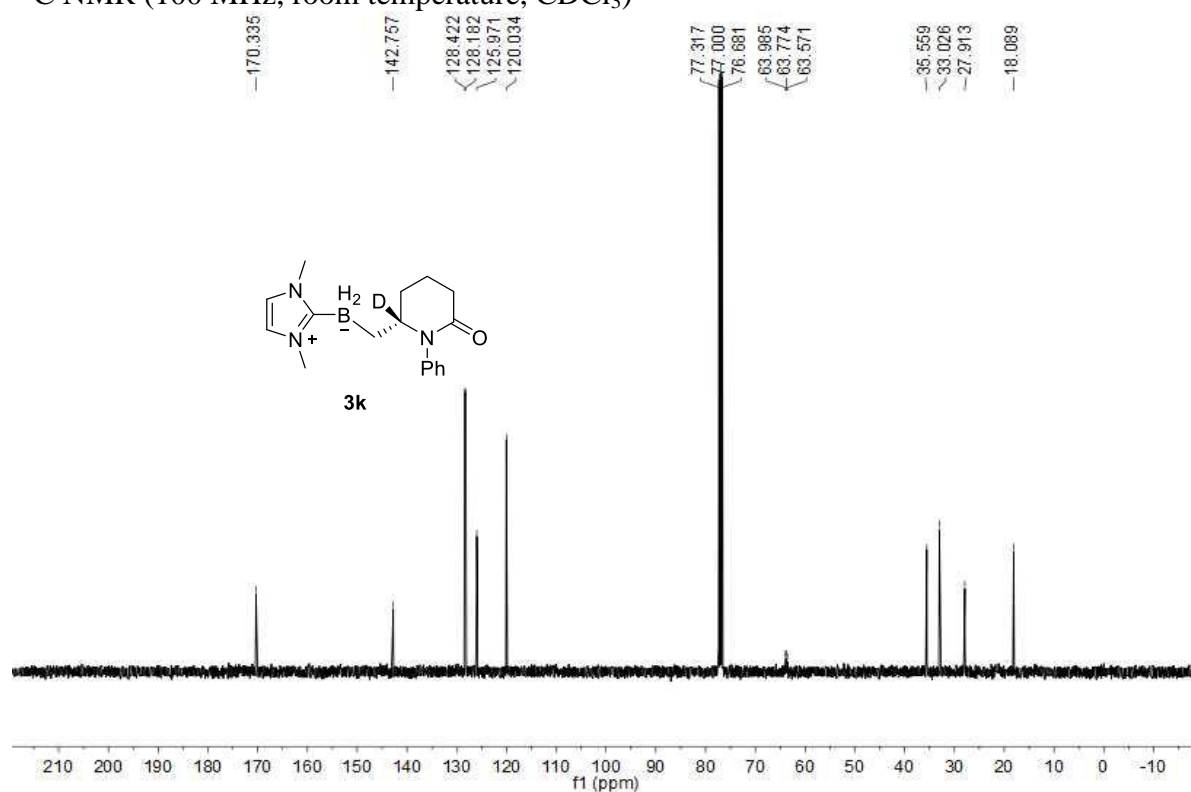

**Supplementary Figure 99.**  $^{13}\text{C}$  NMR spectrum of compound **3k**

$^{11}\text{B}$  NMR (128 MHz, room temperature,  $\text{CDCl}_3$ )

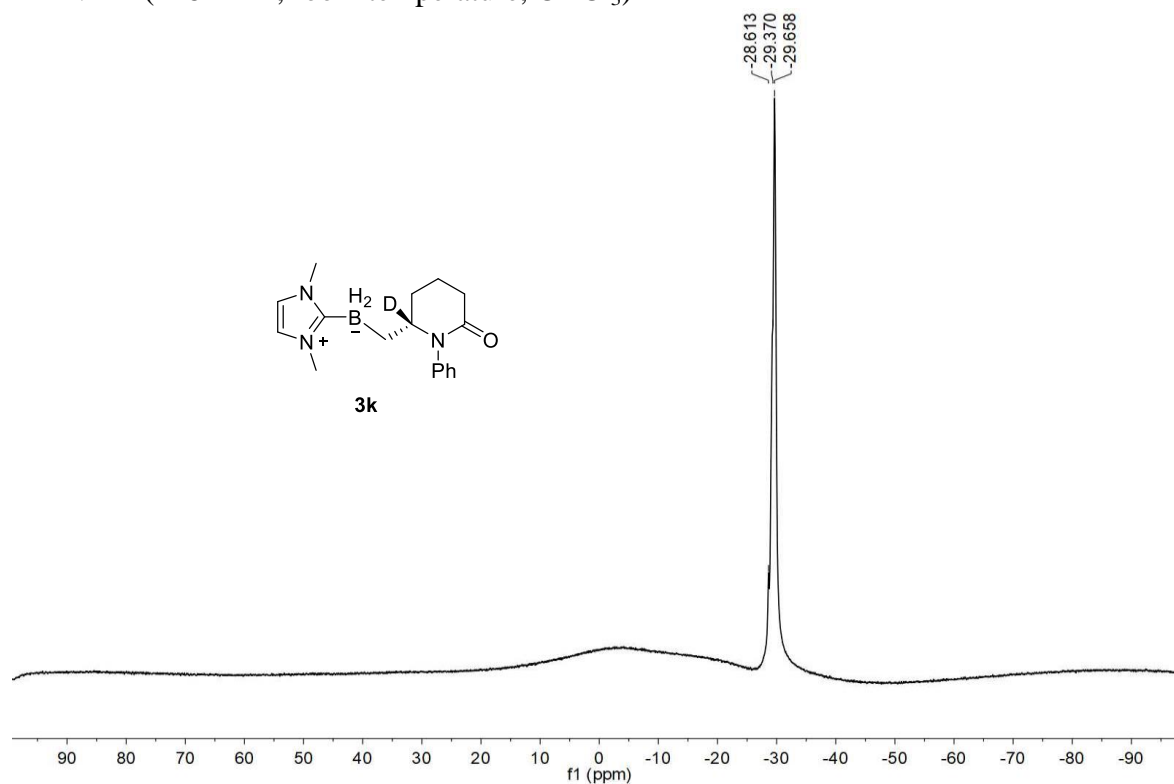

**Supplementary Figure 100.**  $^{11}\text{B}$  NMR spectrum of compound **3k**

### HPLC spectrum of racemic **3k**

Sample Name :  
 Tray# : 1  
 Vial# : 28  
 Data File : sql-6-382-1-4-(10).lcd  
 Method File : 3AD-H-90-0.5-214-100MIN.lcm  
 Date Acquired : 1/20/2022 2:51:06 PM  
 Date Processed : 1/25/2022 1:04:36 AM

<Chromatogram View>

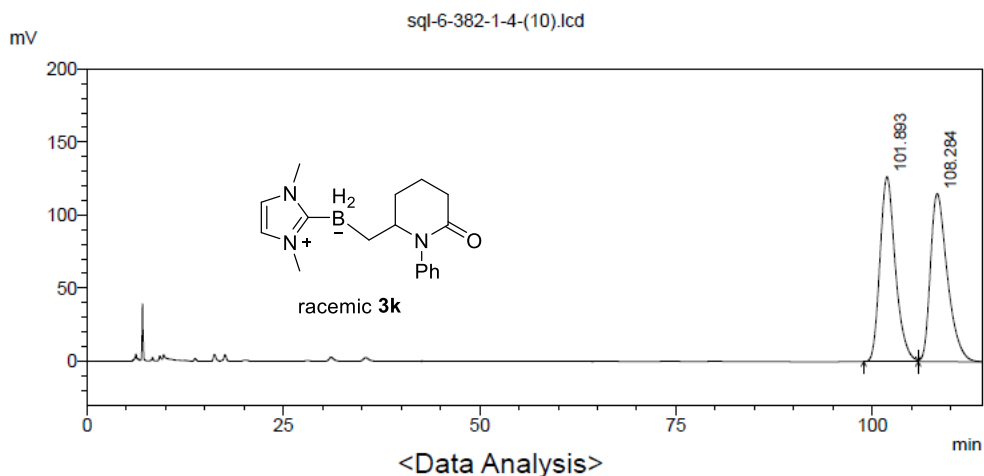

| Detector A 214nm |           |        |          |         |
|------------------|-----------|--------|----------|---------|
| Pesk #           | Ret. Time | Height | Area     | Area%   |
| 1                | 101.893   | 126566 | 17323282 | 50.030  |
| 2                | 108.284   | 115079 | 17302226 | 49.970  |
| Total            |           | 241645 | 34625508 | 100.000 |

### Supplementary Figure 101. HPLC spectrum of racemic **3k**

### HPLC spectrum of **3k**

Tray# : 1  
 Vial# : 29  
 Data File : sql-7-4-(10).lcd  
 Method File : 3AD-H-90-0.5-214-100MIN.lcm  
 Date Acquired : 1/20/2022 4:52:17 PM  
 Date Processed : 1/25/2022 1:04:53 AM

<Chromatogram View>

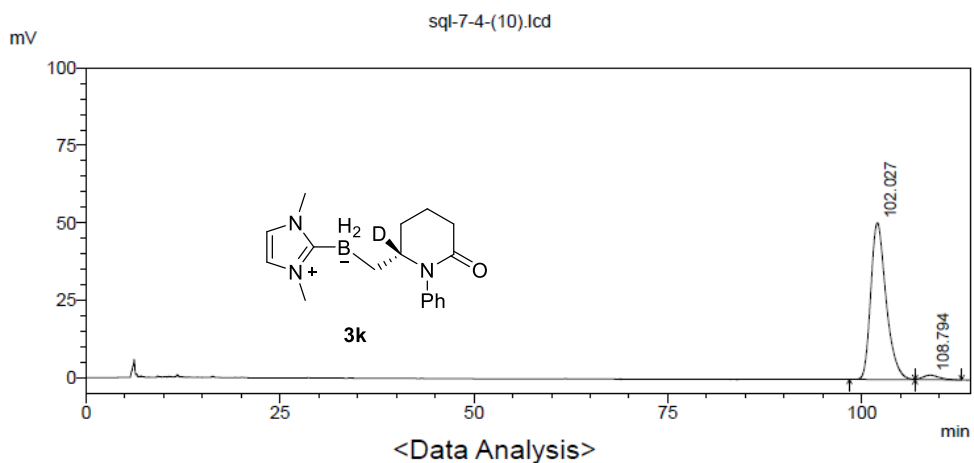

| Detector A 214nm |           |        |         |         |
|------------------|-----------|--------|---------|---------|
| Pesk #           | Ret. Time | Height | Area    | Area%   |
| 1                | 102.027   | 50643  | 6963556 | 96.973  |
| 2                | 108.794   | 1471   | 217381  | 3.027   |
| Total            |           | 52114  | 7180937 | 100.000 |

### Supplementary Figure 102. HPLC spectrum of **3k**



$^1\text{H}$  NMR (400 MHz, room temperature,  $\text{CDCl}_3$ )

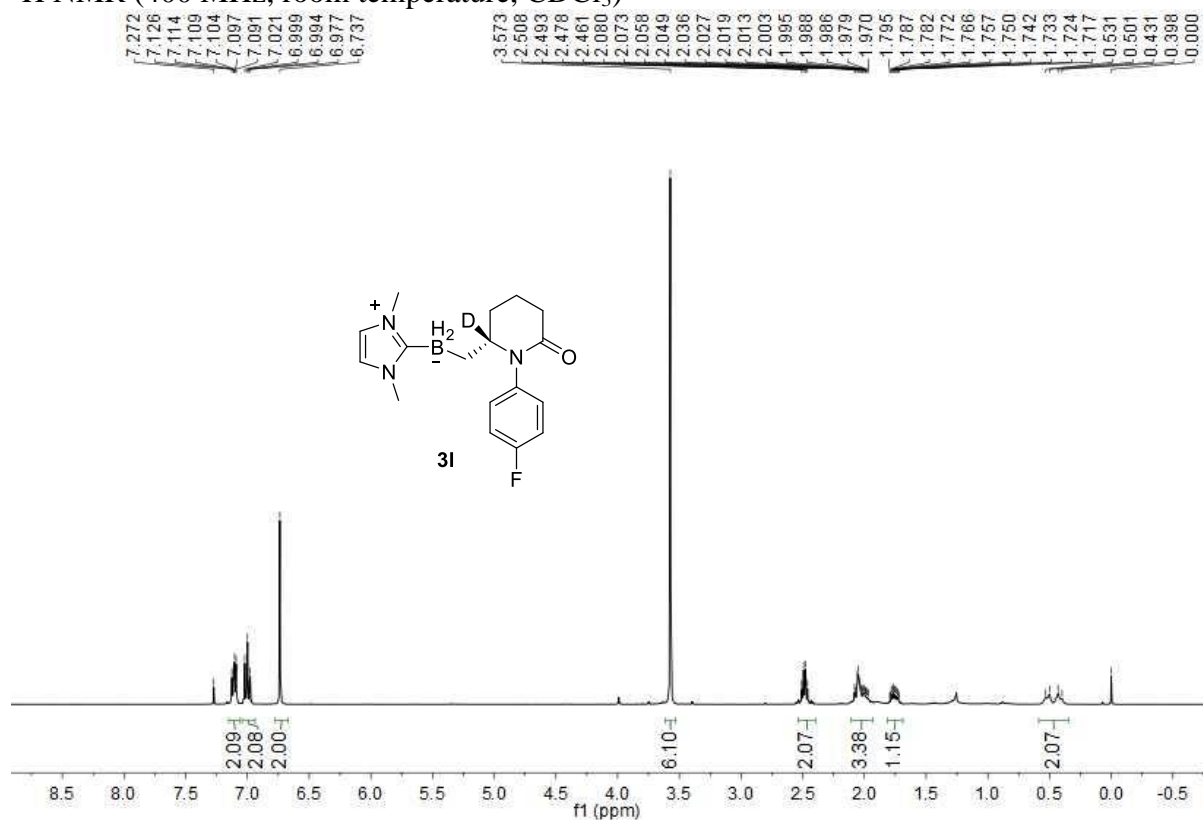

Supplementary Figure 103.  $^1\text{H}$  NMR spectrum of compound **3I**

$^{13}\text{C}$  NMR (100 MHz, room temperature,  $\text{CDCl}_3$ )

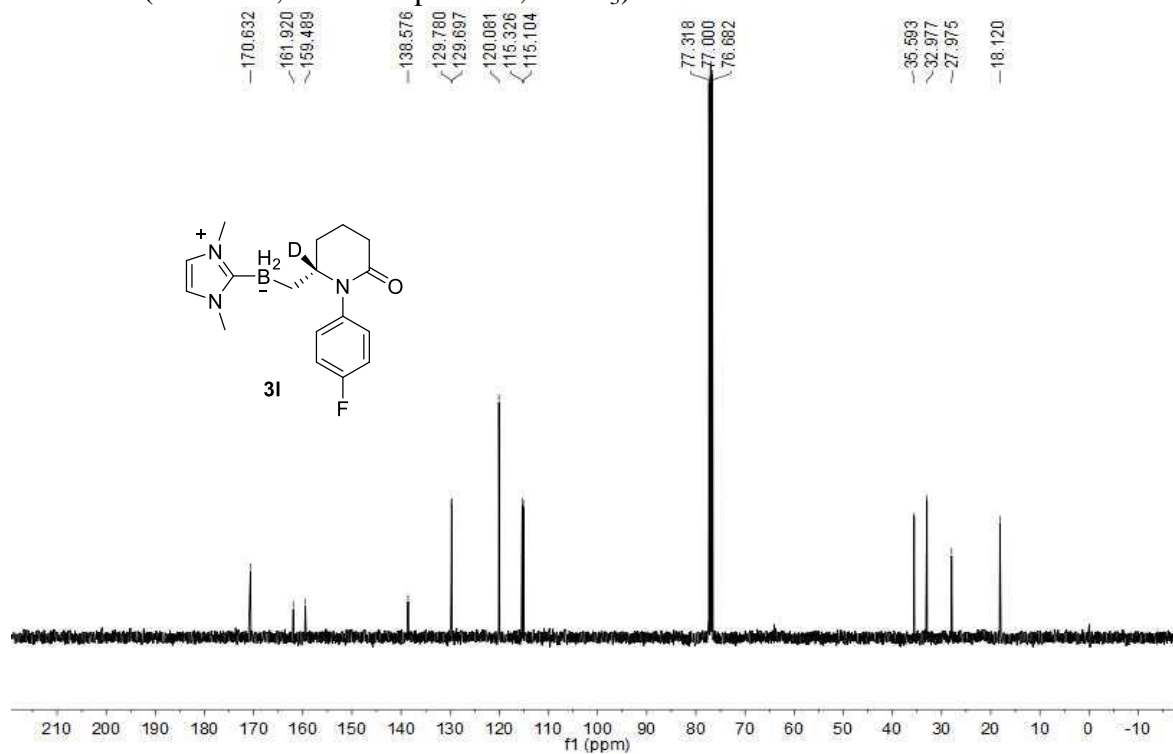

Supplementary Figure 104.  $^{13}\text{C}$  NMR spectrum of compound **3I**

$^{11}\text{B}$  NMR (128 MHz, room temperature,  $\text{CDCl}_3$ )

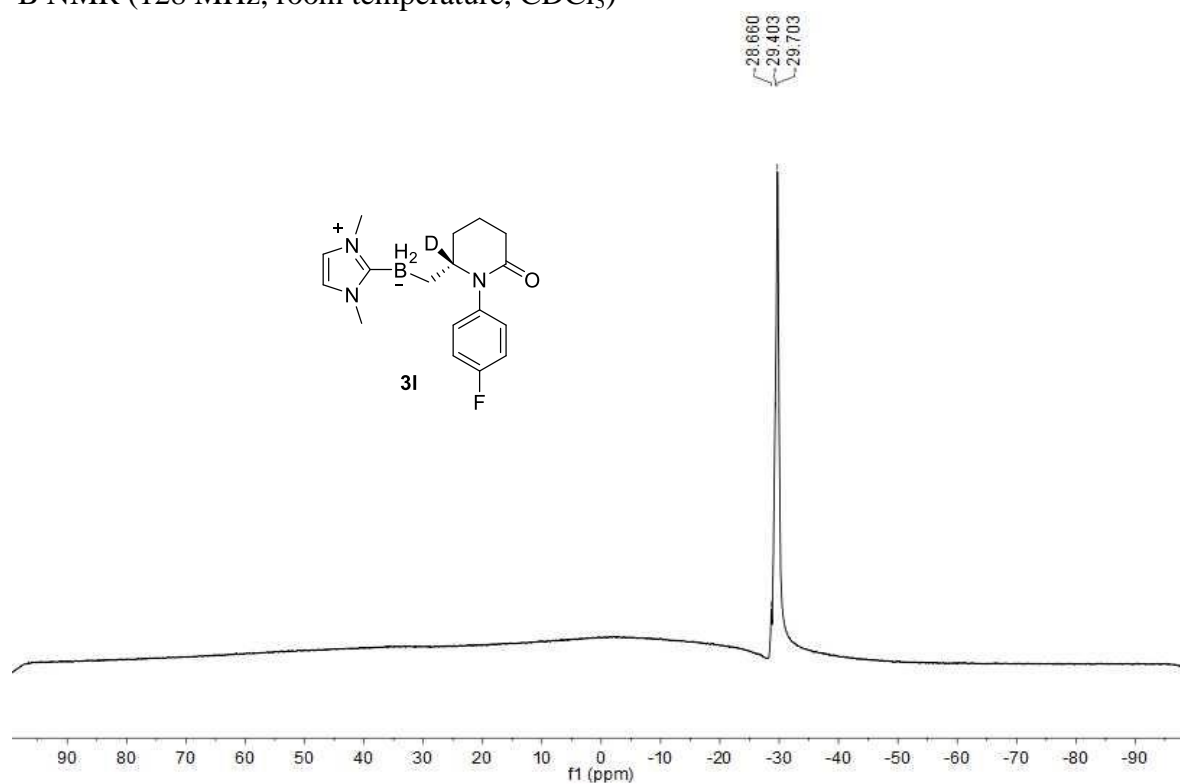

**Supplementary Figure 105.**  $^{11}\text{B}$  NMR spectrum of compound **31**

$^{19}\text{F}$  NMR (376 MHz, room temperature,  $\text{CDCl}_3$ )

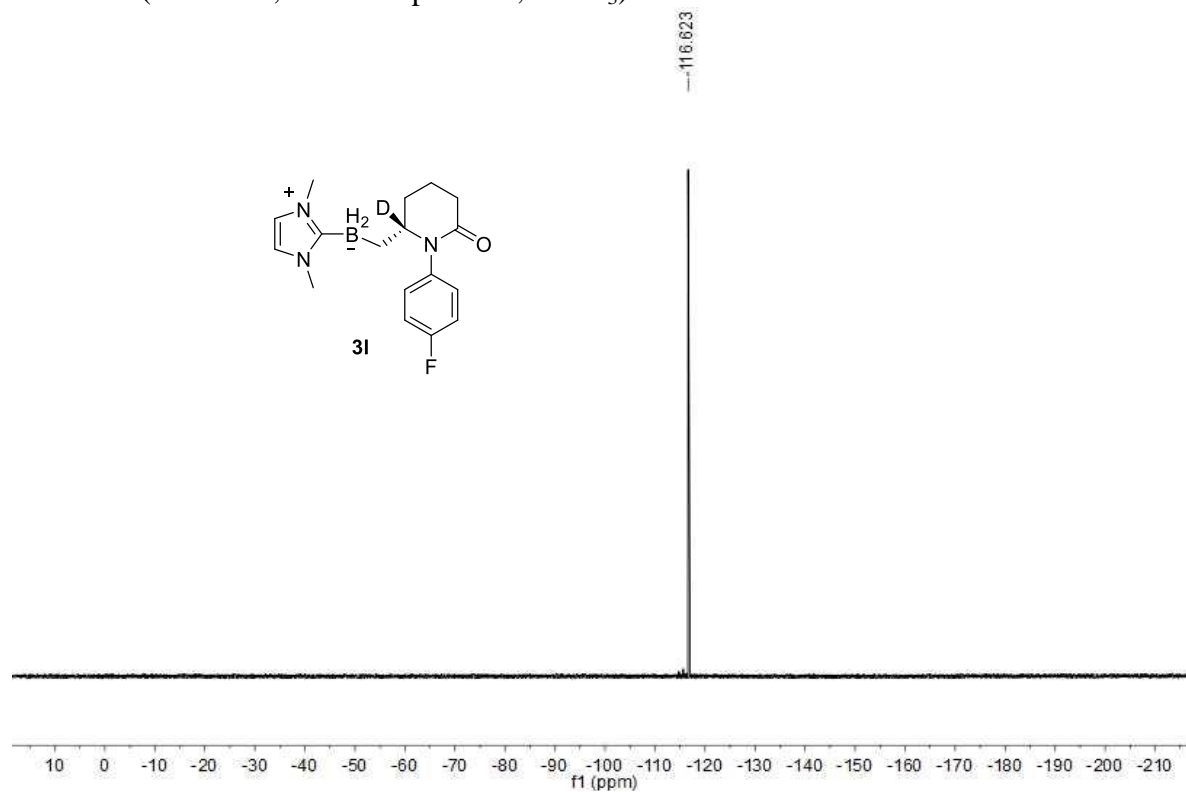

**Supplementary Figure 106.**  $^{19}\text{F}$  NMR spectrum of compound **31**

### HPLC spectrum of racemic **3I**

Tray# : 1  
 Vial# : 46  
 Data File : SQL-7-29-1-2-3.lcd  
 Method File : 4OD-H-80-1.0-214.lcm  
 Date Acquired : 1/23/2022 6:18:49 PM  
 Date Processed : 1/23/2022 7:26:38 PM

<Chromatogram View>

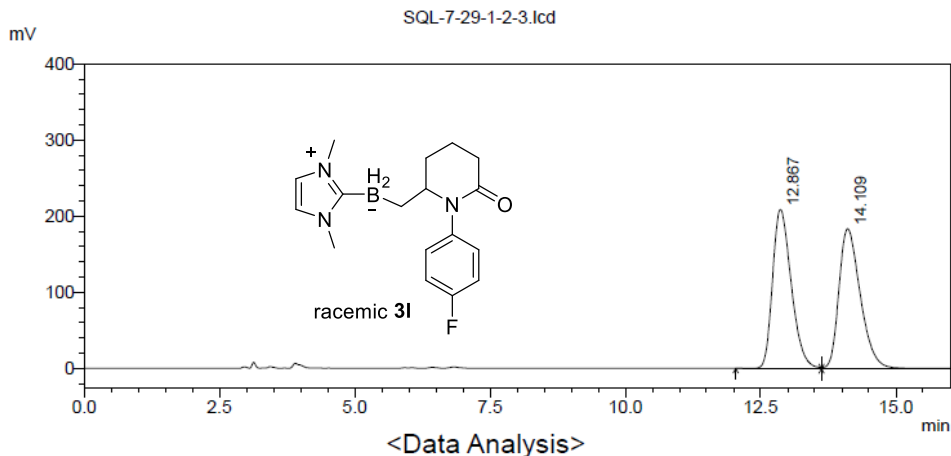

| Detector A 214nm |           |        |          |         |
|------------------|-----------|--------|----------|---------|
| Pesk #           | Ret. Time | Height | Area     | Area%   |
| 1                | 12.867    | 209000 | 5032770  | 49.825  |
| 2                | 14.109    | 183659 | 5068182  | 50.175  |
| Total            |           | 392659 | 10100951 | 100.000 |

### Supplementary Figure 107. HPLC spectrum of racemic **3I**

#### HPLC spectrum of **3I**

Tray# : 1  
 Vial# : 1  
 Data File : sql-7-29-2-1.lcd  
 Method File : 4OD-H-80-1.0-214.lcm  
 Date Acquired : 1/25/2022 5:53:25 AM  
 Date Processed : 1/25/2022 8:22:21 AM

<Chromatogram View>

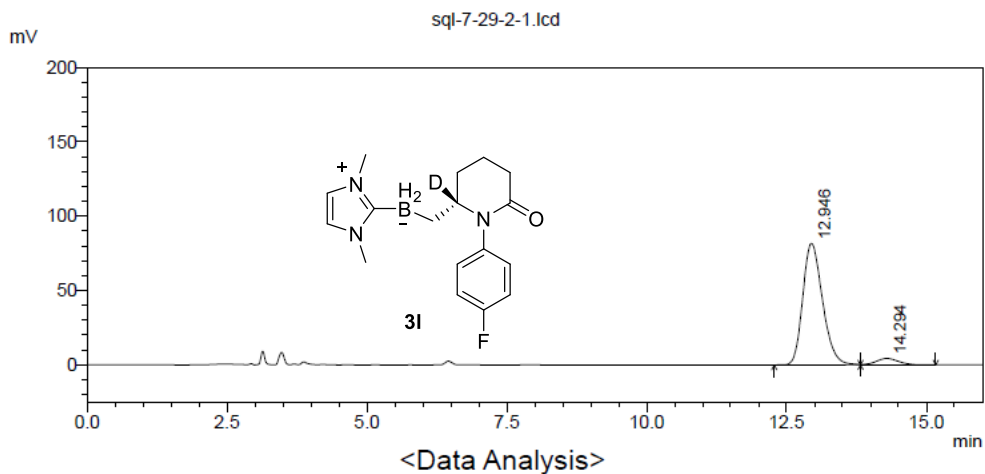

| Detector A 214nm |           |        |         |         |
|------------------|-----------|--------|---------|---------|
| Pesk #           | Ret. Time | Height | Area    | Area%   |
| 1                | 12.946    | 81853  | 2015753 | 94.224  |
| 2                | 14.294    | 4380   | 123562  | 5.776   |
| Total            |           | 86232  | 2139315 | 100.000 |

### Supplementary Figure 108. HPLC spectrum of **3I**

$^1\text{H}$  NMR (400 MHz, room temperature,  $\text{CDCl}_3$ )

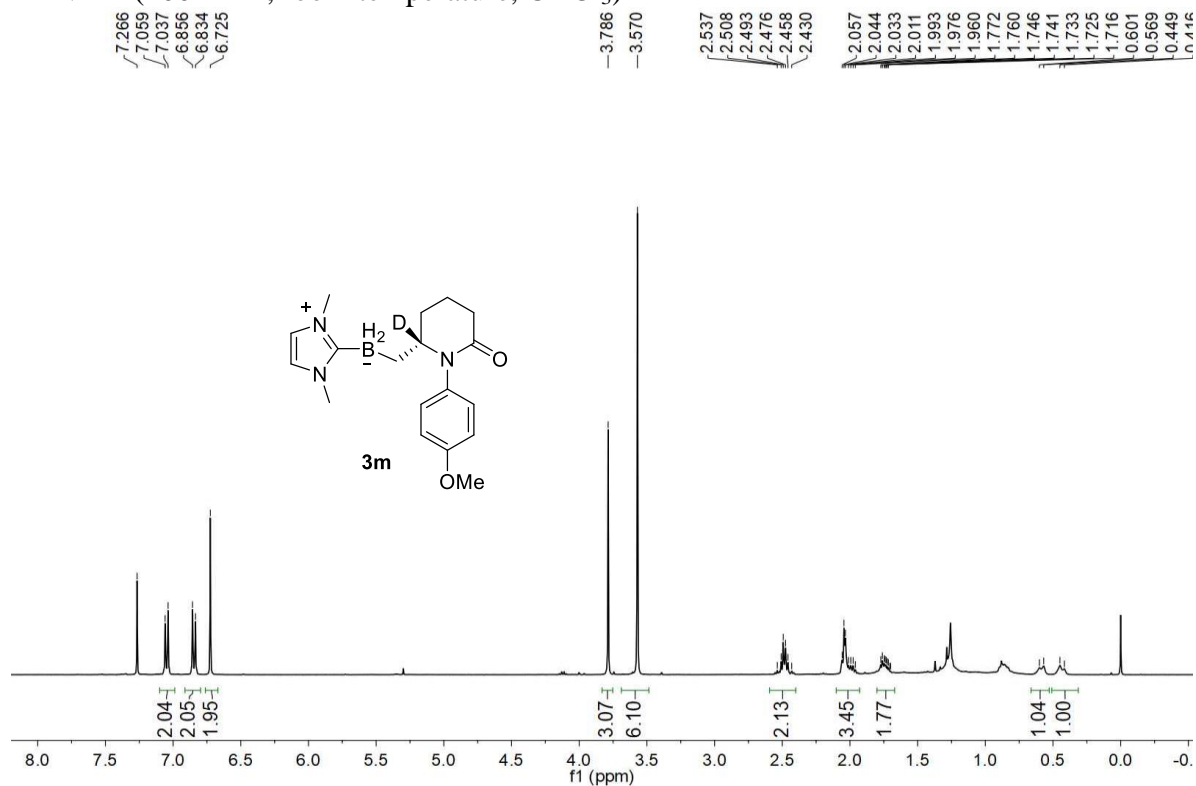

Supplementary Figure 109.  $^1\text{H}$  NMR spectrum of compound **3m**

$^{13}\text{C}$  NMR (100 MHz, room temperature,  $\text{CDCl}_3$ )

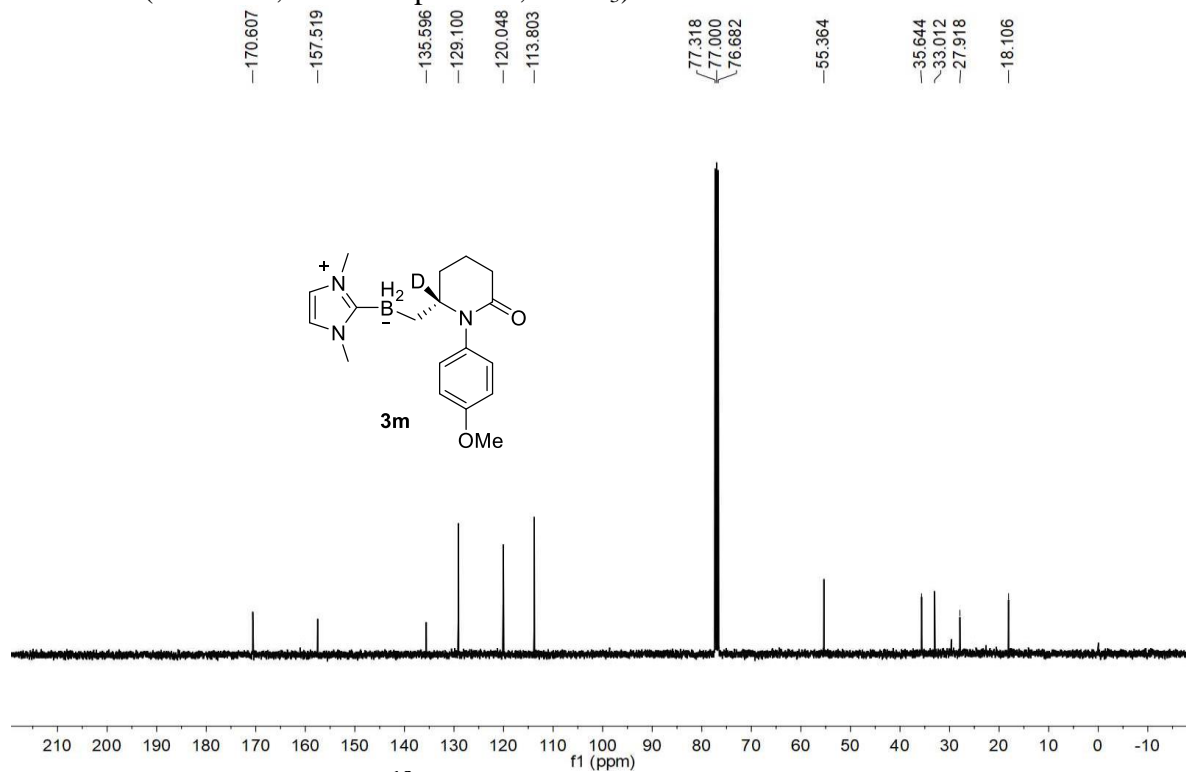

Supplementary Figure 110.  $^{13}\text{C}$  NMR spectrum of compound **3m**

$^{11}\text{B}$  NMR (128 MHz, room temperature,  $\text{CDCl}_3$ )

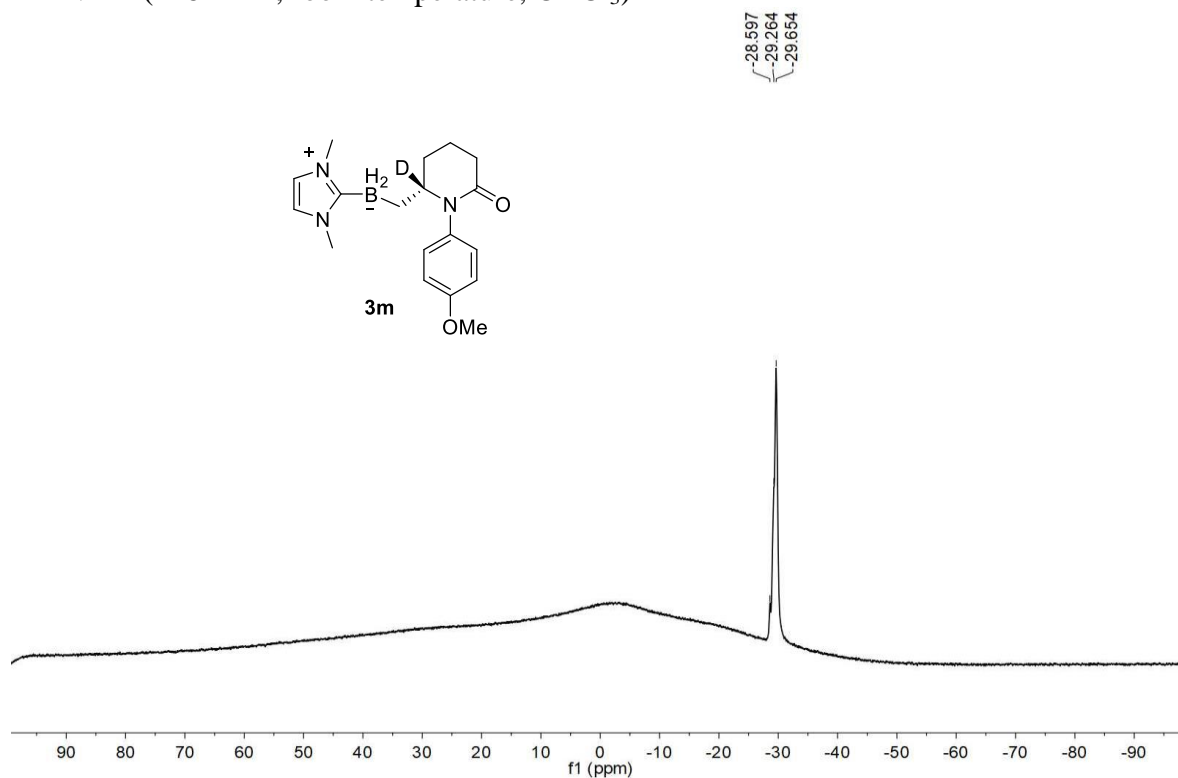

Supplementary Figure 111.  $^{11}\text{B}$  NMR spectrum of compound **3m**

HPLC spectrum of racemic **3m**

Sample Name :  
Tray# : 1  
Vial# : 10  
Data File : sql-7-50-1.lcd  
Method File : 4OD-H-70-1.0-214.lcm  
Date Acquired : 2/15/2022 2:35:56 PM  
Date Processed : 2/15/2022 3:42:15 PM

<Chromatogram View>

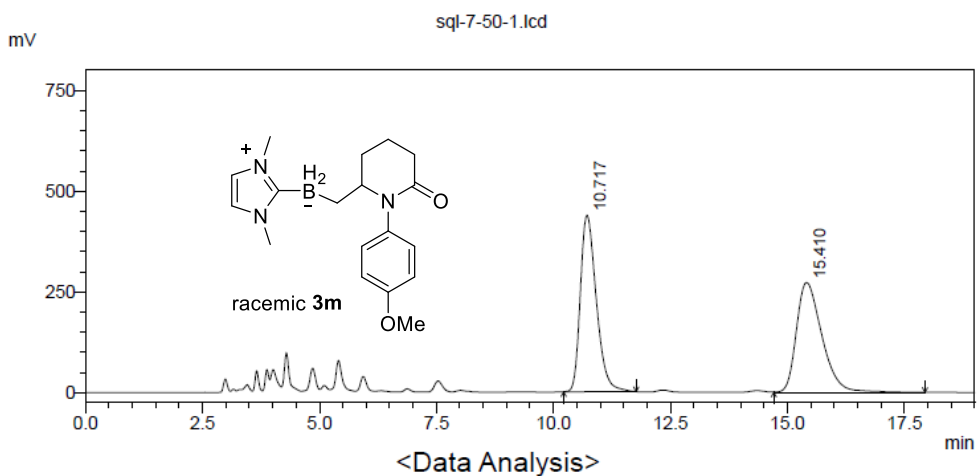

<Data Analysis>

| Detector A 214nm |           |        |          |         |
|------------------|-----------|--------|----------|---------|
| Pesk #           | Ret. Time | Height | Area     | Area%   |
| 1                | 10.717    | 437864 | 10414336 | 50.161  |
| 2                | 15.410    | 272954 | 10347531 | 49.839  |
| Total            |           | 710818 | 20761868 | 100.000 |

Supplementary Figure 112. HPLC spectrum of racemic **3m**

### HPLC spectrum of 3m

Sample Name :  
 Tray# : 1  
 Vial# : 11  
 Data File : sql-7-50-2.lcd  
 Method File : 40D-H-70-1.0-214.lcm  
 Date Acquired : 2/15/2022 2:57:45 PM  
 Date Processed : 2/15/2022 3:41:22 PM

<Chromatogram View>

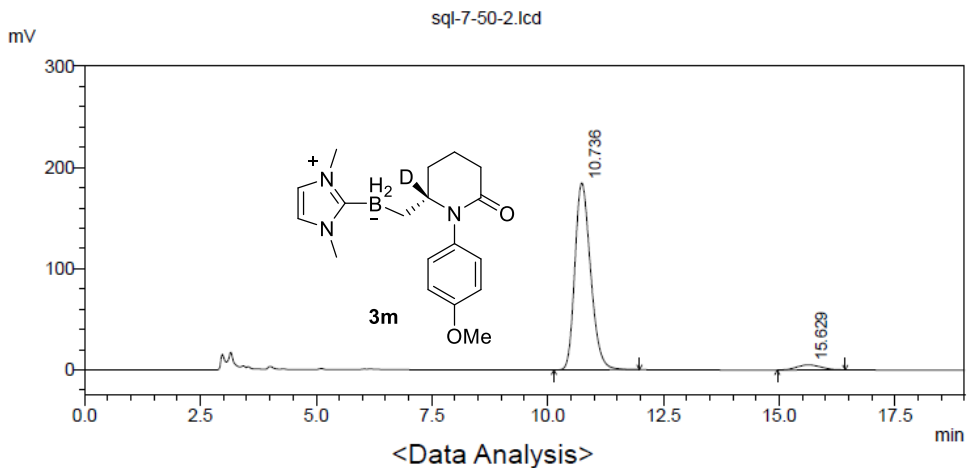

| Detector A 214nm |           |        |         |         |
|------------------|-----------|--------|---------|---------|
| Peak #           | Ret. Time | Height | Area    | Area%   |
| 1                | 10.736    | 184656 | 4366000 | 96.006  |
| 2                | 15.629    | 5003   | 181638  | 3.994   |
| Total            |           | 189658 | 4547639 | 100.000 |

### Supplementary Figure 113. HPLC spectrum of 3m

<sup>1</sup>H NMR (400 MHz, room temperature, CDCl<sub>3</sub>)

7.412, 7.409, 7.404, 7.390, 7.387, 7.337, 7.331, 7.317, 7.301, 7.297, 7.265, 7.127, 7.124, 7.121, 7.109, 7.106, 7.102, 7.087, 6.746, 3.663, 2.668, 2.652, 2.644, 2.628, 2.625, 2.610, 2.601, 2.586, 2.521, 2.504, 2.497, 2.480, 2.461, 2.455, 2.437, 2.339, 2.324, 2.315, 2.308, 2.300, 2.292, 2.284, 2.268, 1.970, 1.952, 1.945, 1.938, 1.928, 1.920, 1.914, 1.896, 0.821, 0.790, 0.354, 0.322, 0.000

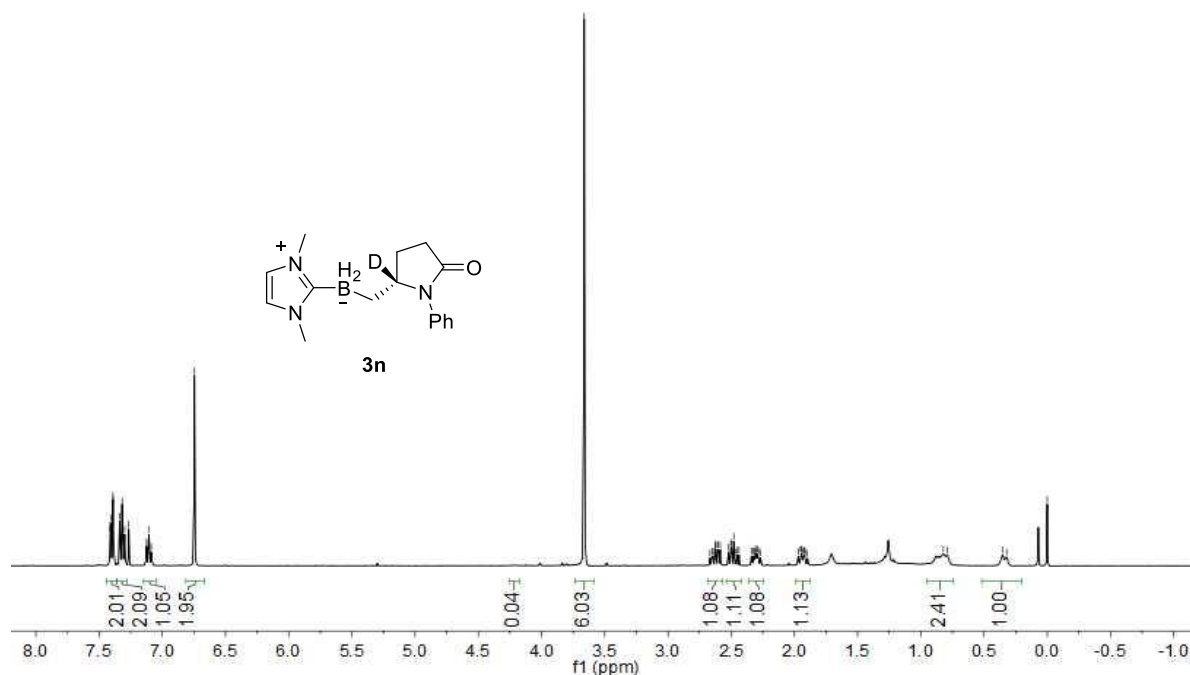

### Supplementary Figure 114. <sup>1</sup>H NMR spectrum of compound 3n

$^{13}\text{C}$  NMR (100 MHz, room temperature,  $\text{CDCl}_3$ )

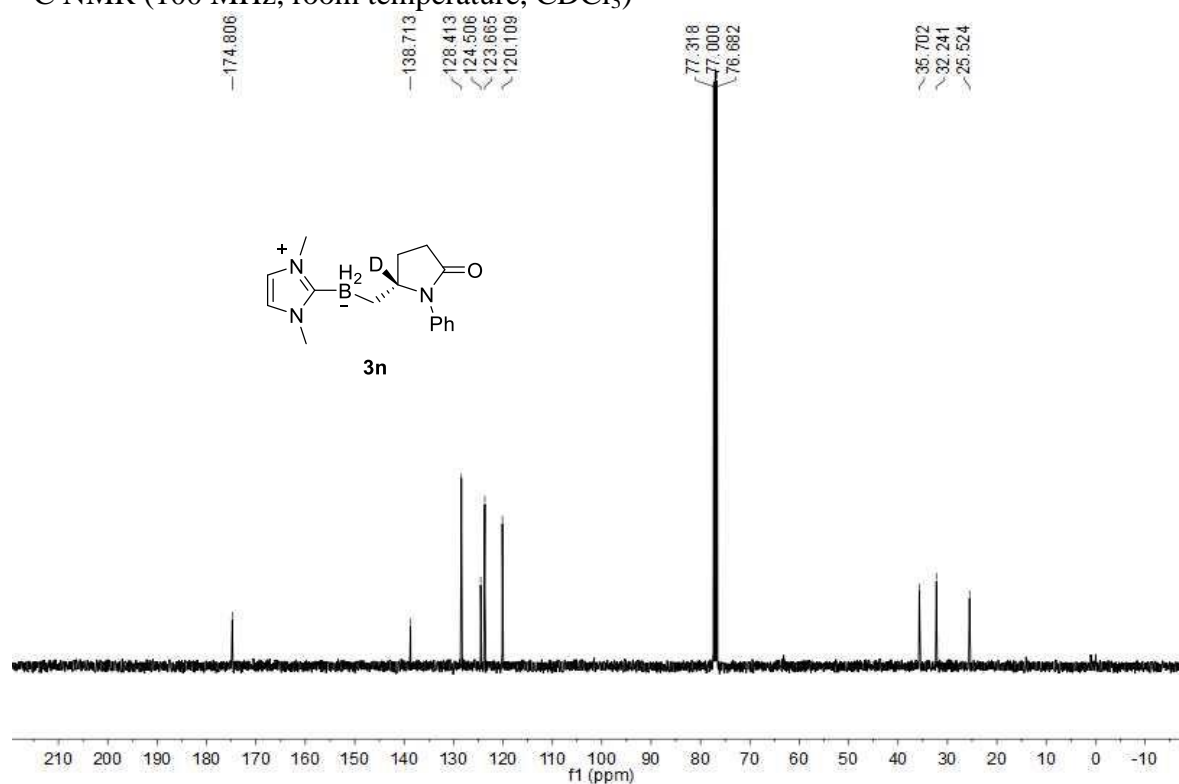

Supplementary Figure 115.  $^{13}\text{C}$  NMR spectrum of compound **3n**

$^{11}\text{B}$  NMR (128 MHz, room temperature,  $\text{CDCl}_3$ )

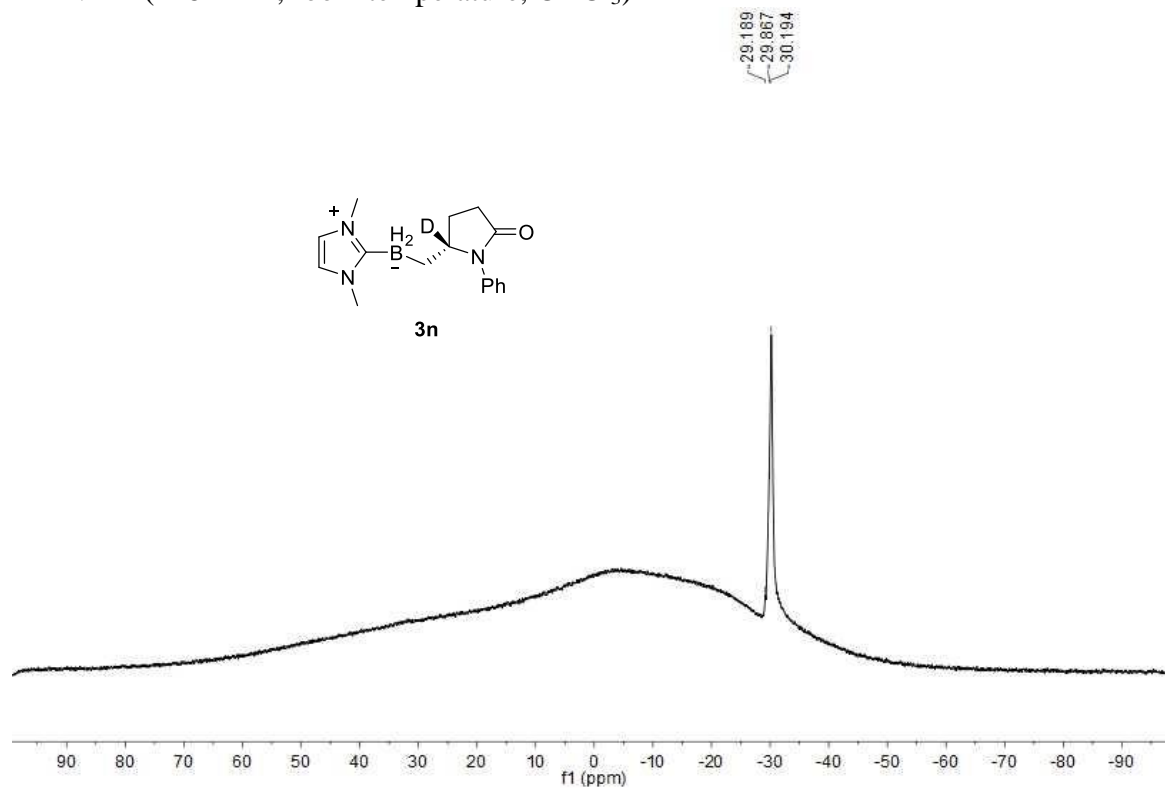

Supplementary Figure 116.  $^{11}\text{B}$  NMR spectrum of compound **3n**

### HPLC spectrum of racemic **3n**

Tray# : 1  
 Vial# : 10  
 Data File : sql-6-351-10.lcd  
 Method File : 3AD-H-75-0.5-214-50MIN.lcm  
 Date Acquired : 2/2/2022 11:32:22 AM  
 Date Processed : 2/2/2022 11:56:46 AM

<Chromatogram View>

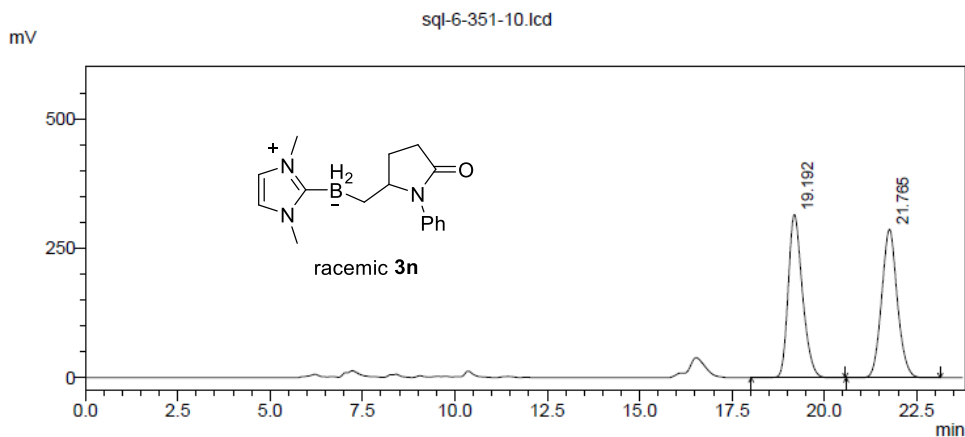

<Data Analysis>

| Detector A 214nm |           |        |          |         |
|------------------|-----------|--------|----------|---------|
| Pesk #           | Ret. Time | Height | Area     | Area%   |
| 1                | 19.192    | 315322 | 8469121  | 49.935  |
| 2                | 21.765    | 286879 | 8491288  | 50.065  |
| Total            |           | 602200 | 16960408 | 100.000 |

### Supplementary Figure 117. HPLC spectrum of racemic **3n**

#### HPLC spectrum of **3n**

Tray# : 1  
 Vial# : 12  
 Data File : sql-6-357-1.lcd  
 Method File : 3AD-H-75-0.5-214-50MIN.lcm  
 Date Acquired : 2/2/2022 11:57:23 AM  
 Date Processed : 2/2/2022 12:22:19 PM

<Chromatogram View>

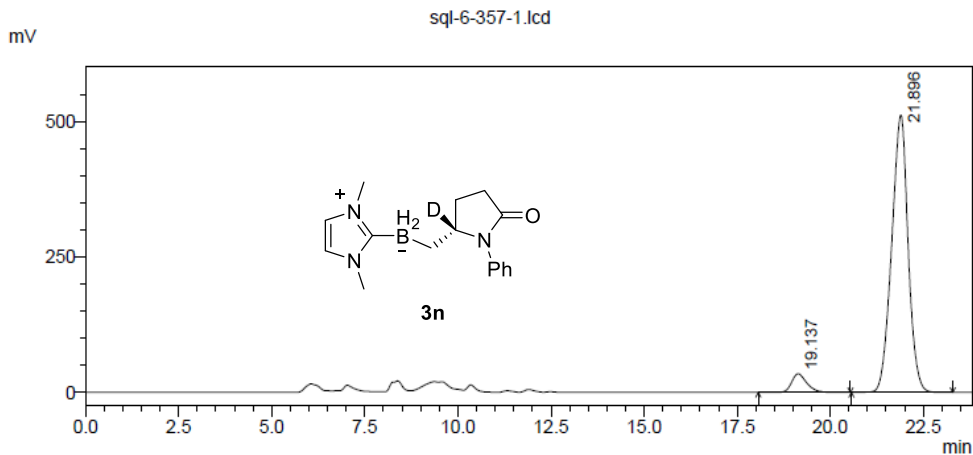

<Data Analysis>

| Detector A 214nm |           |        |          |         |
|------------------|-----------|--------|----------|---------|
| Pesk #           | Ret. Time | Height | Area     | Area%   |
| 1                | 19.137    | 34267  | 962167   | 5.774   |
| 2                | 21.896    | 511696 | 15701001 | 94.226  |
| Total            |           | 545963 | 16663168 | 100.000 |

### Supplementary Figure 118. HPLC spectrum of **3n**



$^1\text{H}$  NMR (400 MHz, room temperature,  $\text{CDCl}_3$ )

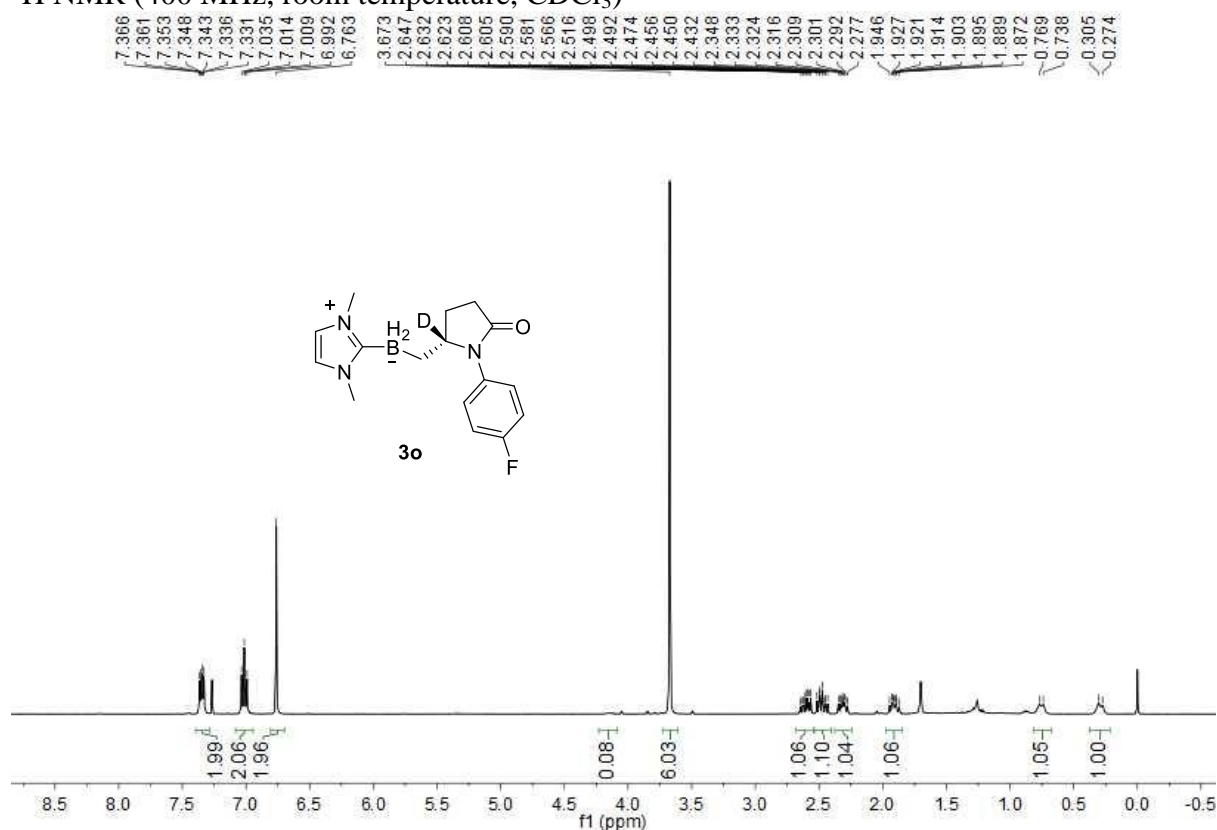

Supplementary Figure 119.  $^1\text{H}$  NMR spectrum of compound **3o**

$^{13}\text{C}$  NMR (100 MHz, room temperature,  $\text{CDCl}_3$ )

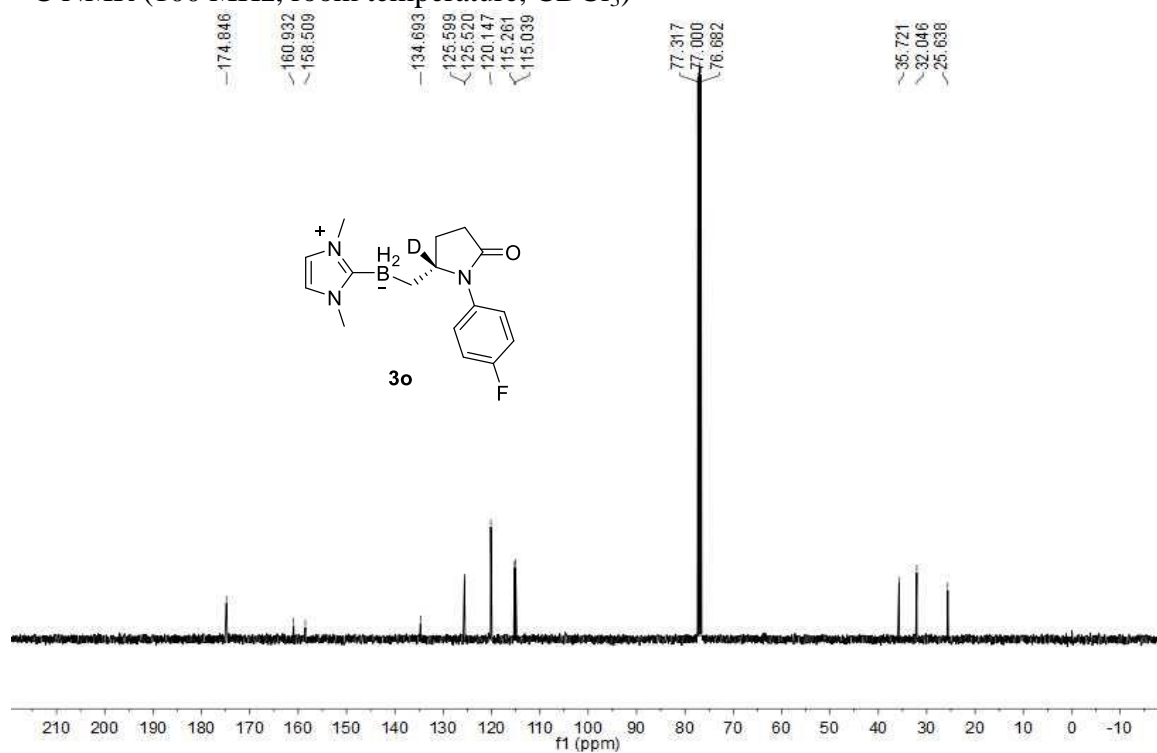

Supplementary Figure 120.  $^{13}\text{C}$  NMR spectrum of compound **3o**

$^{11}\text{B}$  NMR (128 MHz, room temperature,  $\text{CDCl}_3$ )

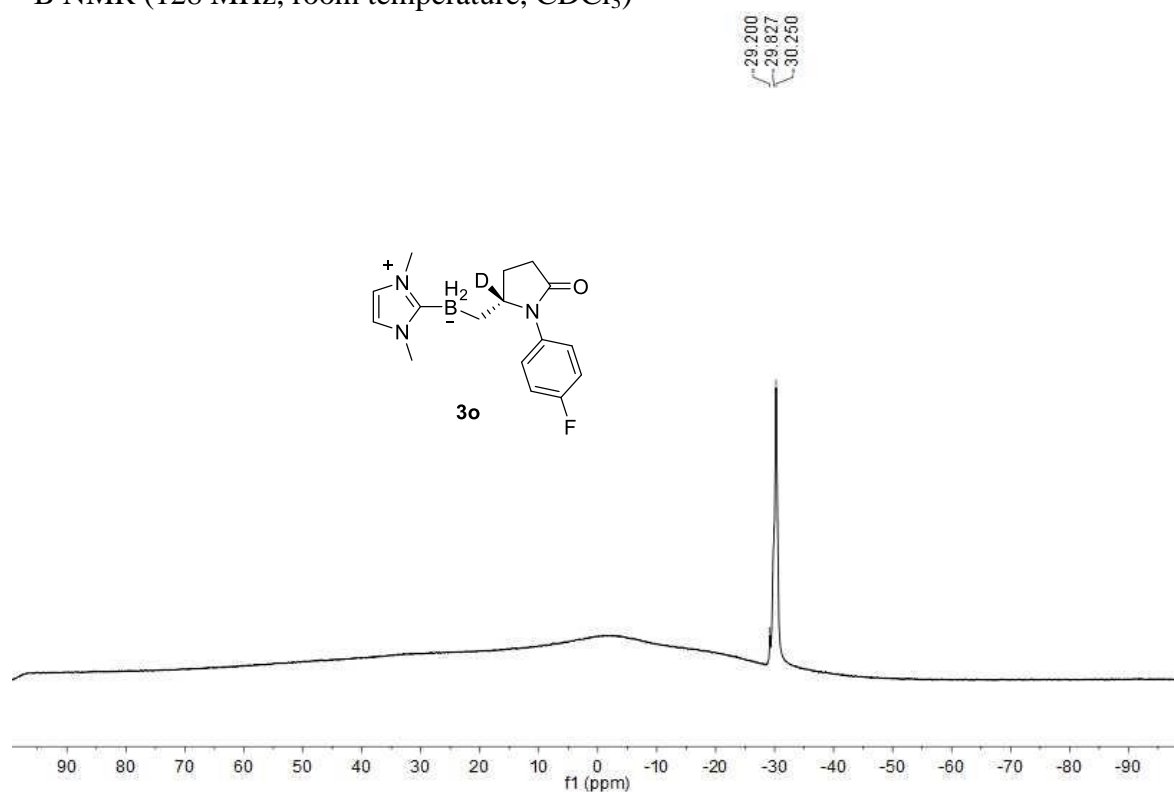

**Supplementary Figure 121.**  $^{11}\text{B}$  NMR spectrum of compound **3o**

$^{19}\text{F}$  NMR (376 MHz, room temperature,  $\text{CDCl}_3$ )

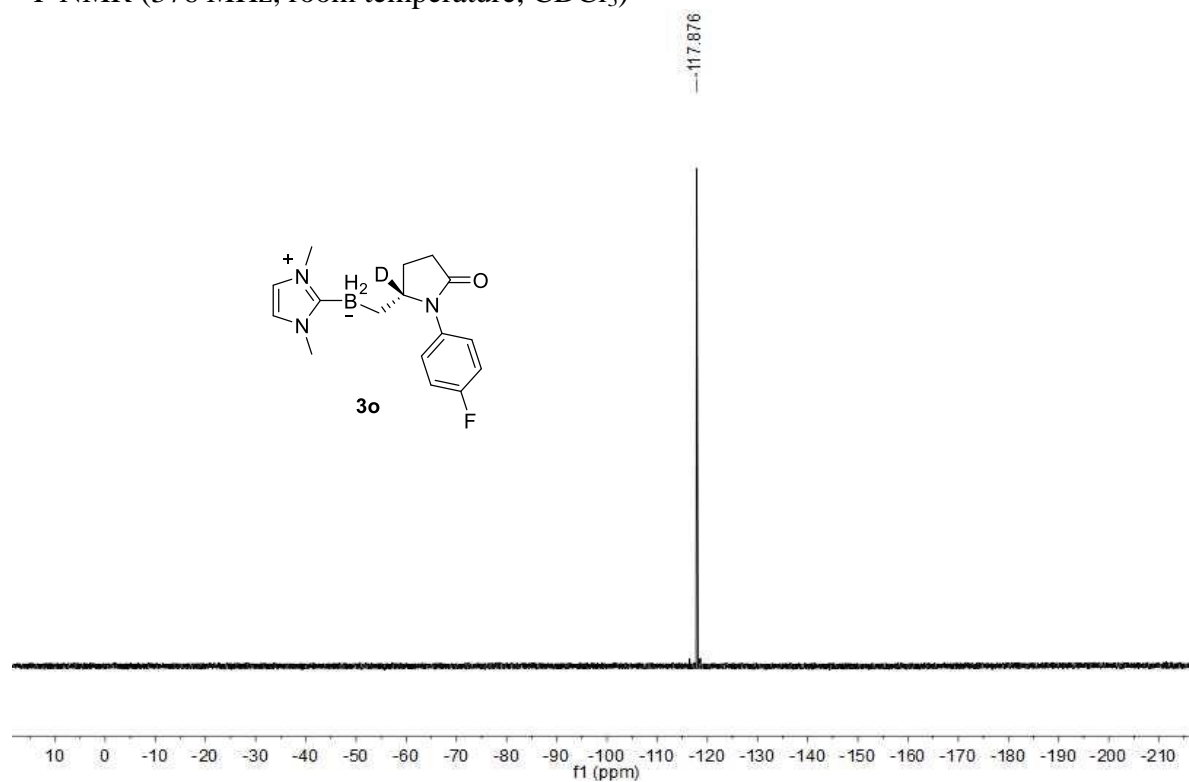

**Supplementary Figure 122.**  $^{19}\text{F}$  NMR spectrum of compound **3o**

### HPLC spectrum of racemic **3o**

Tray# : 1  
 Vial# : 10  
 Data File : sql-6-398-1-(12).lcd  
 Method File : 3AD-H-75-0.5-214-50MIN.lcm  
 Date Acquired : 1/25/2022 2:31:00 AM  
 Date Processed : 1/25/2022 8:49:47 AM

<Chromatogram View>

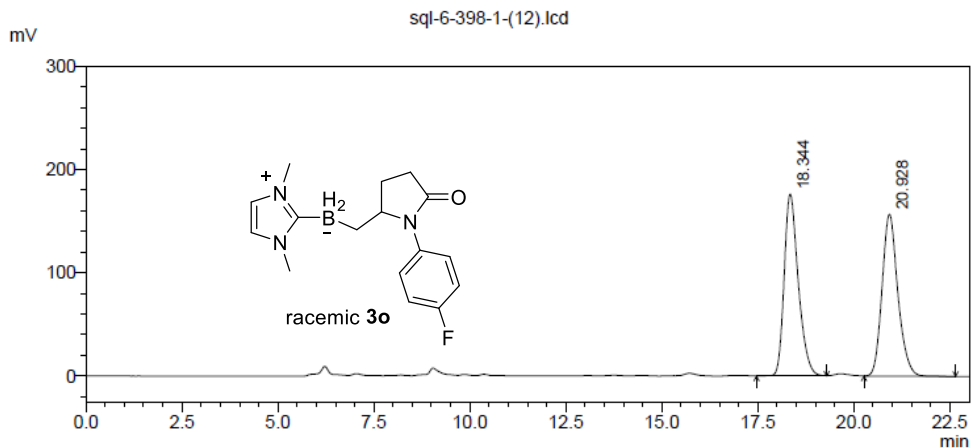

<Data Analysis>

Detector A 214nm

| Peak # | Ret. Time | Height | Area    | Area%   |
|--------|-----------|--------|---------|---------|
| 1      | 18.344    | 176393 | 4524873 | 50.149  |
| 2      | 20.928    | 157007 | 4498063 | 49.851  |
| Total  |           | 333400 | 9022936 | 100.000 |

### Supplementary Figure 123. HPLC spectrum of racemic **3o**

#### HPLC spectrum of **3o**

Tray# : 1  
 Vial# : 11  
 Data File : sql-7-19-4-(12).lcd  
 Method File : 3AD-H-75-0.5-214-50MIN.lcm  
 Date Acquired : 1/25/2022 2:58:06 AM  
 Date Processed : 1/25/2022 8:55:00 AM

<Chromatogram View>

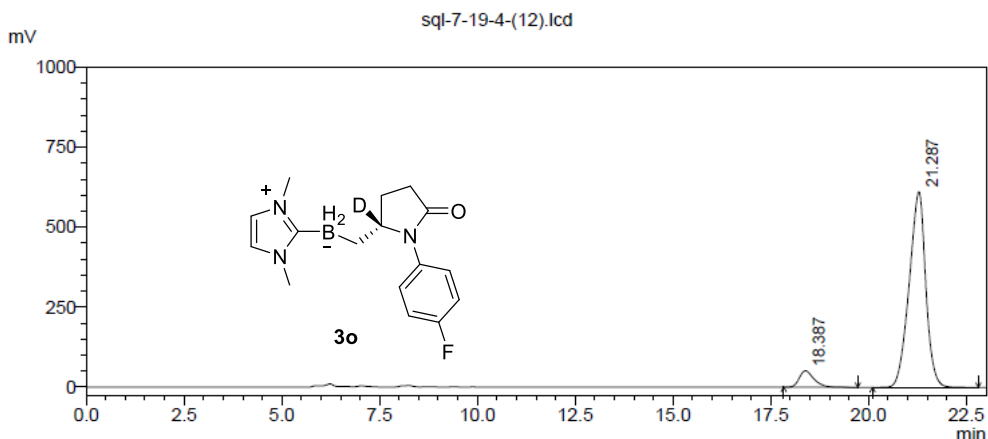

<Data Analysis>

Detector A 214nm

| Peak # | Ret. Time | Height | Area     | Area%   |
|--------|-----------|--------|----------|---------|
| 1      | 18.387    | 51587  | 1340140  | 6.935   |
| 2      | 21.287    | 610328 | 17984484 | 93.065  |
| Total  |           | 661915 | 19324625 | 100.000 |

### Supplementary Figure 124. HPLC spectrum of **3o**

$^1\text{H}$  NMR (400 MHz, room temperature,  $\text{CDCl}_3$ )

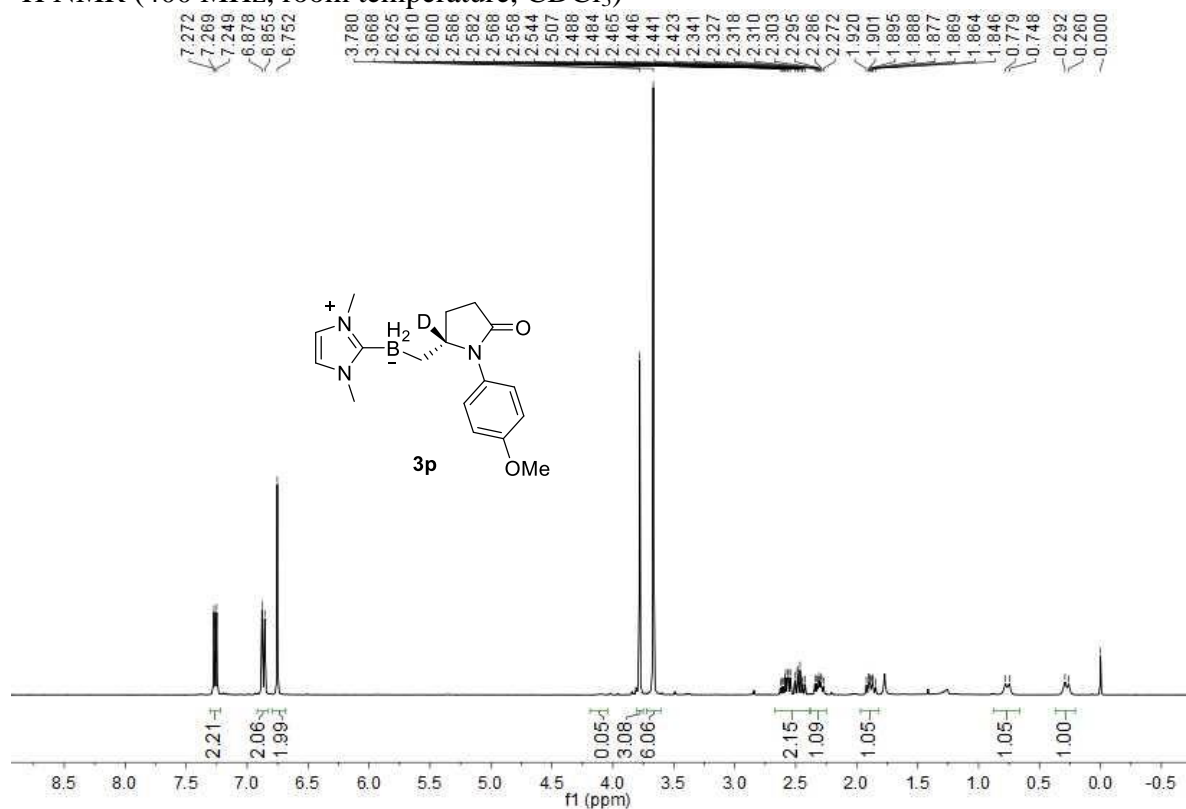

Supplementary Figure 125.  $^1\text{H}$  NMR spectrum of compound **3p**

$^{13}\text{C}$  NMR (100 MHz, room temperature,  $\text{CDCl}_3$ )

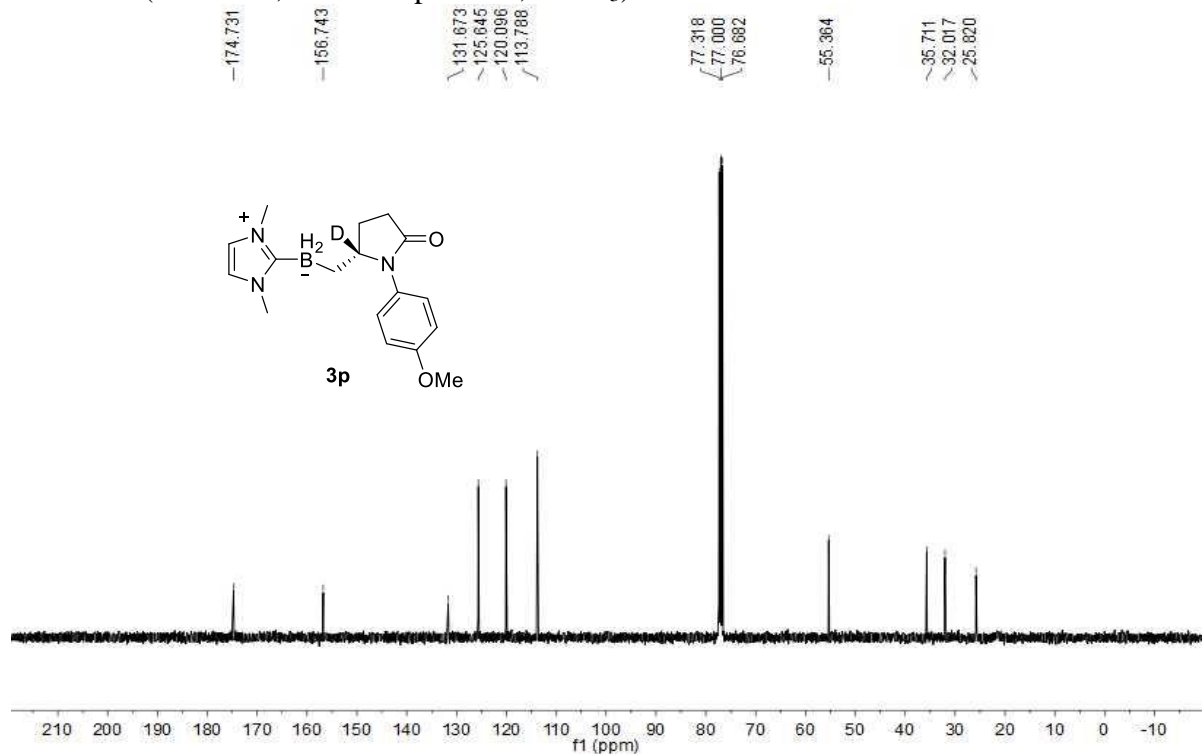

Supplementary Figure 126.  $^{13}\text{C}$  NMR spectrum of compound **3p**

$^{11}\text{B}$  NMR (128 MHz, room temperature,  $\text{CDCl}_3$ )

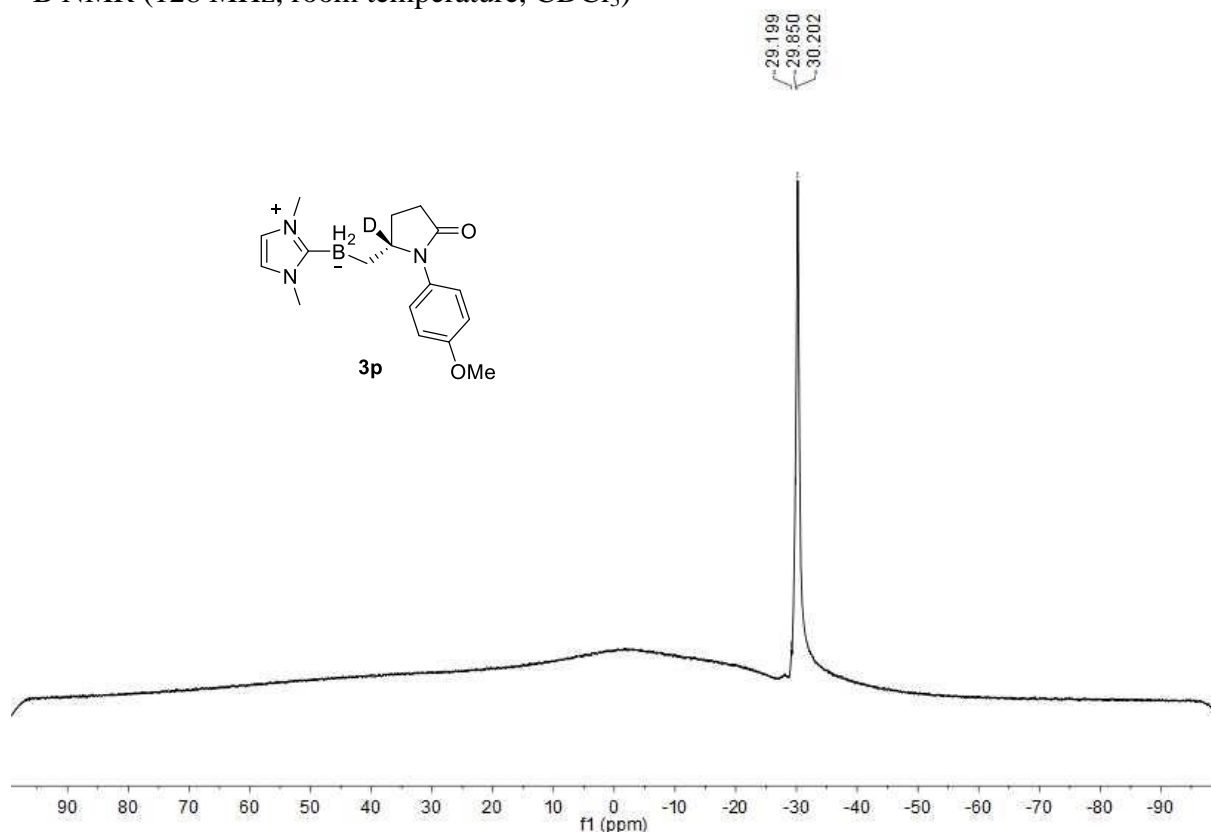

Supplementary Figure 127.  $^{11}\text{B}$  NMR spectrum of compound **3p**

HPLC spectrum of racemic **3p**

Tray# : 1  
Vial# : 14  
Data File : sql-6-399-1-(13).lcd  
Method File : 3AD-H-60-0.5-214.lcm  
Date Acquired : 1/25/2022 4:38:17 AM  
Date Processed : 1/25/2022 8:52:12 AM

<Chromatogram View>

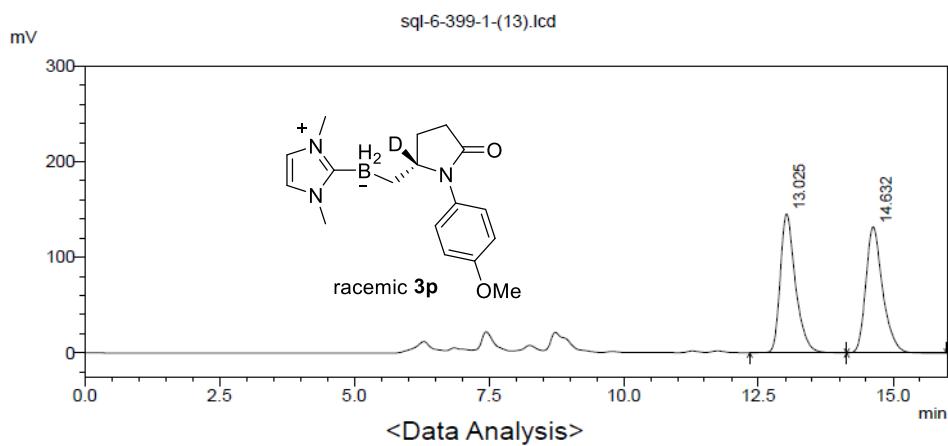

| Detector A 214nm |           |        |         |         |
|------------------|-----------|--------|---------|---------|
| Pes#             | Ret. Time | Height | Area    | Area%   |
| 1                | 13.025    | 145609 | 2889270 | 50.093  |
| 2                | 14.632    | 132127 | 2878585 | 49.907  |
| Total            |           | 277736 | 5767855 | 100.000 |

Supplementary Figure 128. HPLC spectrum of racemic **3p**

# HPLC spectrum of **3p**

Tray# : 1  
Vial# : 15  
Data File : sql-7-20-3-(13).lcd  
Method File : 3AD-H-60-0.5-214.lcm  
Date Acquired : 1/25/2022 4:57:24 AM  
Date Processed : 1/25/2022 8:51:38 AM

<Chromatogram View>

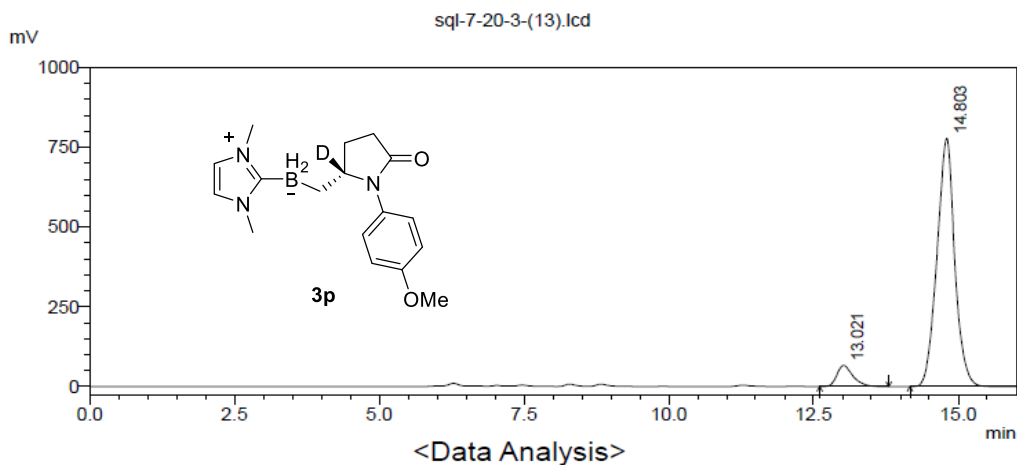

Detector A 214nm

| Peak # | Ret. Time | Height | Area     | Area%   |
|--------|-----------|--------|----------|---------|
| 1      | 13.021    | 66563  | 1292331  | 7.216   |
| 2      | 14.803    | 778007 | 16617160 | 92.784  |
| Total  |           | 844570 | 17909491 | 100.000 |

Supplementary Figure 129. HPLC spectrum of **3p**

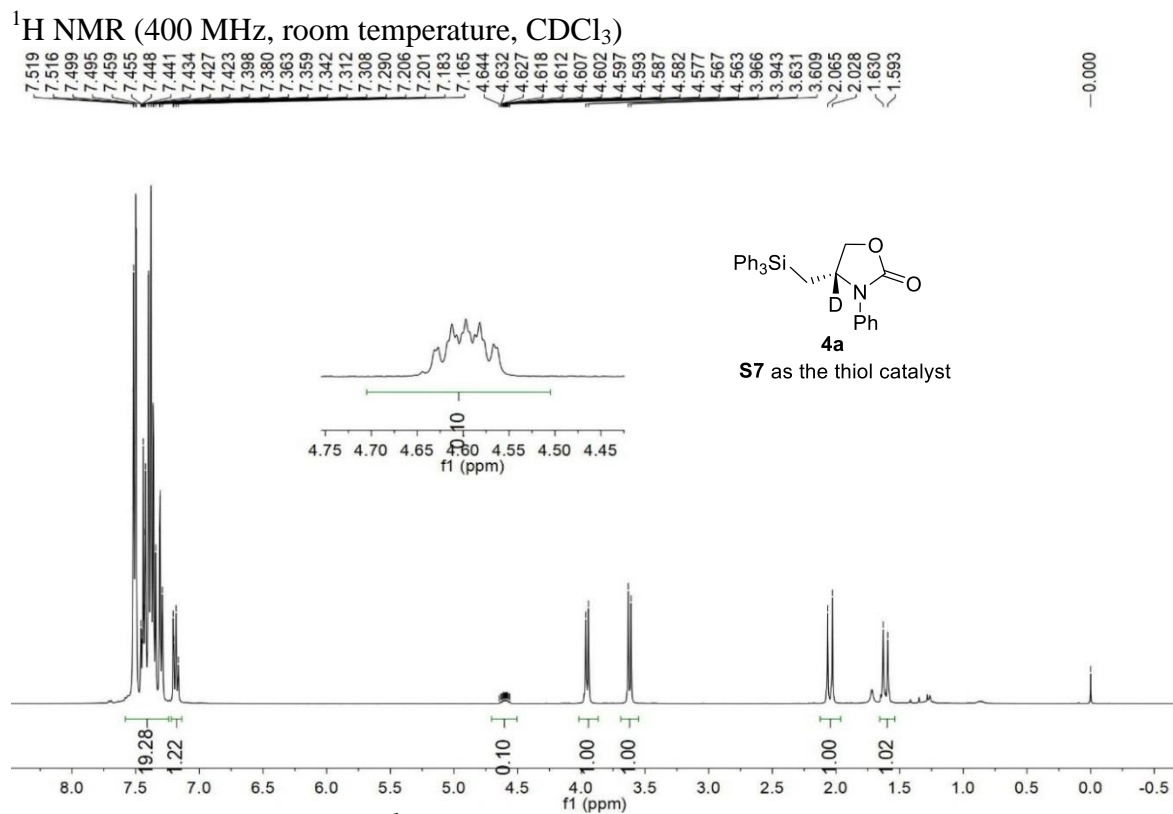

Supplementary Figure 130. <sup>1</sup>H NMR spectrum of compound **4a** (**S7** as the thiol catalyst)

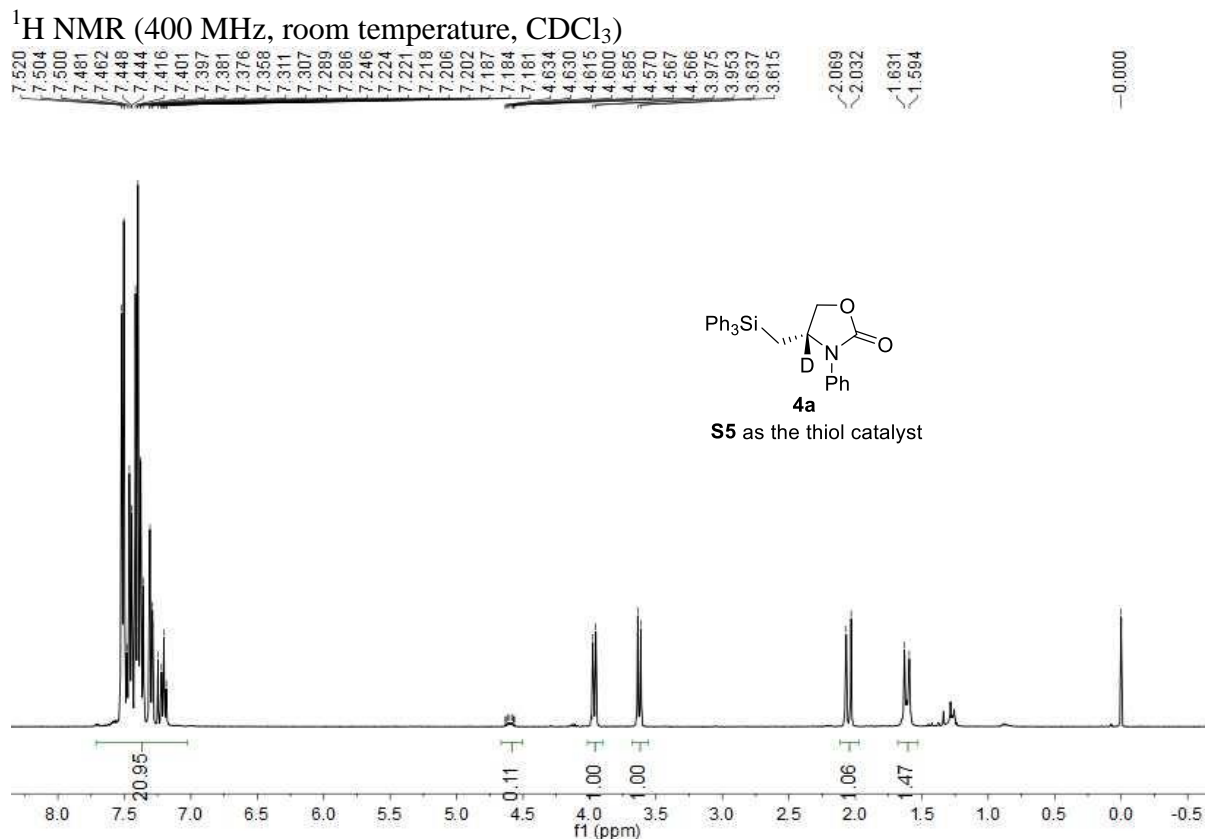

Supplementary Figure 131. <sup>1</sup>H NMR spectrum of compound **4a** (**S5** as the thiol catalyst)

<sup>1</sup>H NMR (400 MHz, room temperature, CDCl<sub>3</sub>)

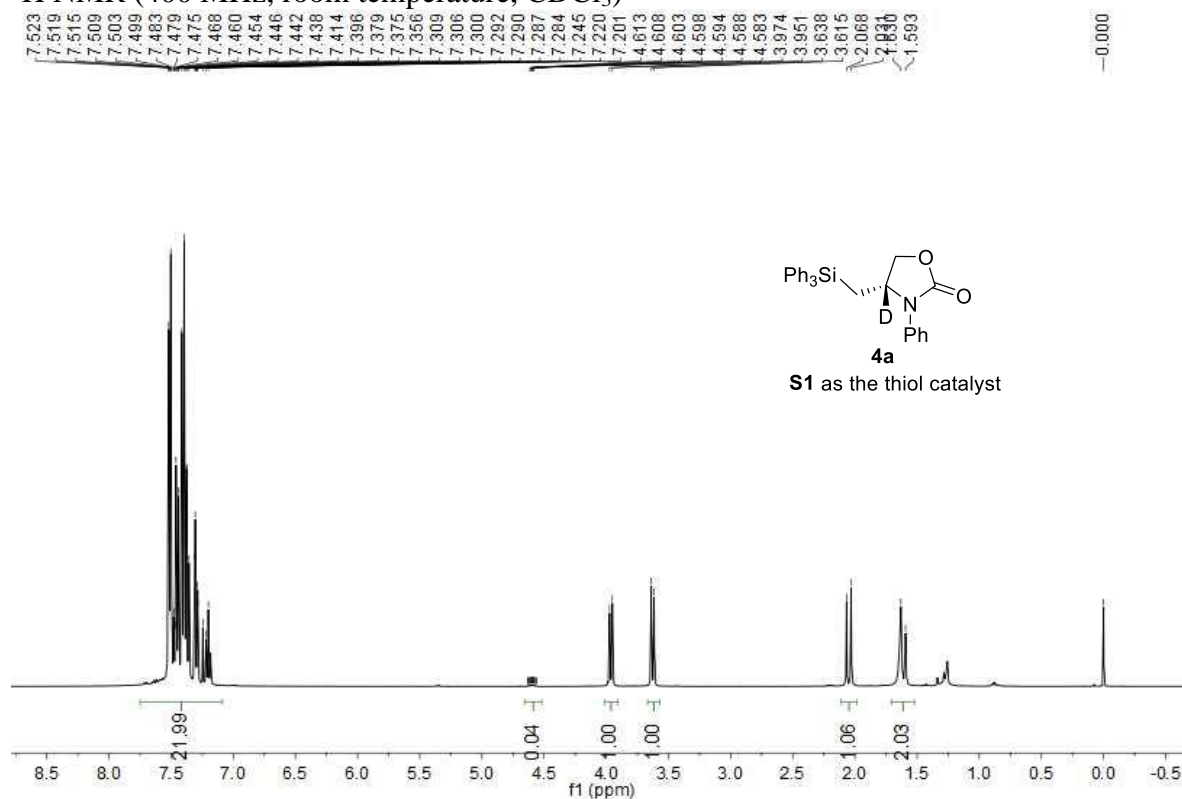

Supplementary Figure 132. <sup>1</sup>H NMR spectrum of compound **4a** (S1 as the thiol catalyst)

<sup>13</sup>C NMR (100 MHz, room temperature, CDCl<sub>3</sub>)

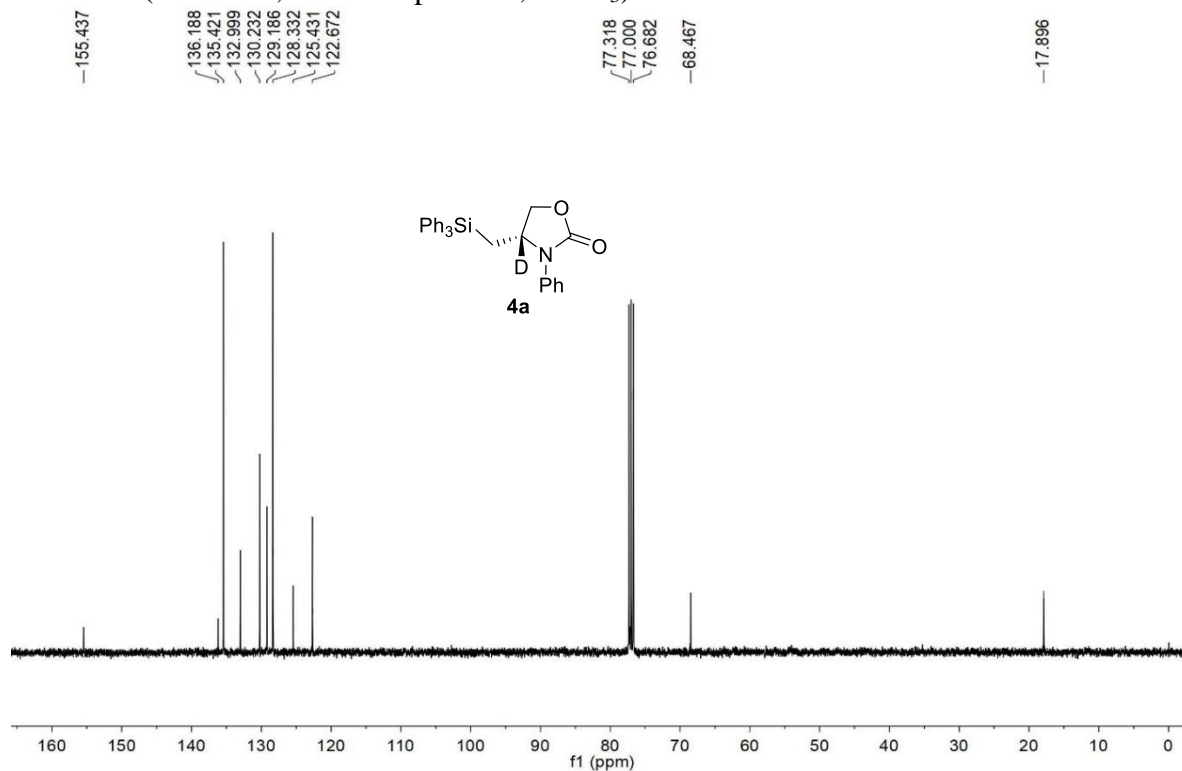

Supplementary Figure 133. <sup>13</sup>C NMR spectrum of compound **4a**



### HPLC spectrum of racemic **4a**

Tray# : 1  
 Vial# : 46  
 Data File : sql-5-320-1.lcd  
 Method File : 3AD-H-90-1-214.lcm  
 Date Acquired : 2/25/2022 9:19:32 PM  
 Date Processed : 2/25/2022 11:04:00 PM

<Chromatogram View>

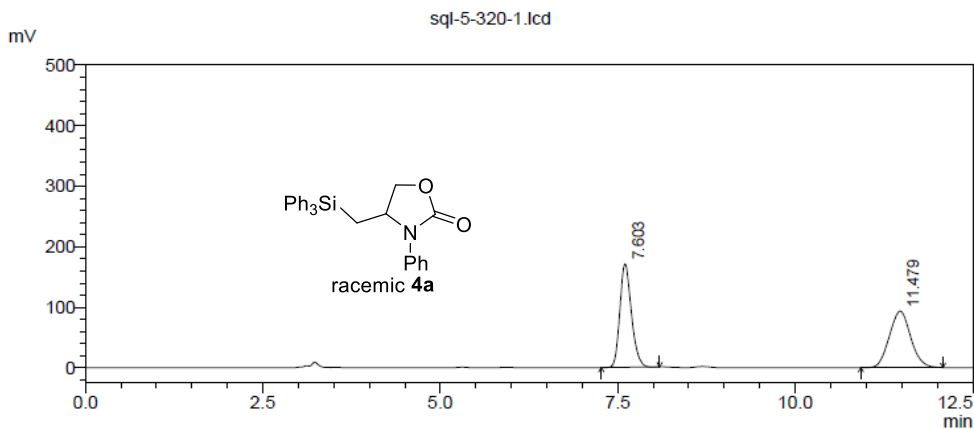

Detector A 214nm

| Pesck # | Ret. Time | Height | Area    | Area%   |
|---------|-----------|--------|---------|---------|
| 1       | 7.603     | 170746 | 1930467 | 49.802  |
| 2       | 11.479    | 93099  | 1945791 | 50.198  |
| Total   |           | 263846 | 3876258 | 100.000 |

### Supplementary Figure 134. HPLC spectrum of racemic **4a**

#### HPLC spectrum of **4a** (**S7** as the thiol catalyst)

Sample Name :  
 Tray# : 1  
 Vial# : 47  
 Data File : sql-6-349-3.lcd  
 Method File : 3AD-H-90-1-214.lcm  
 Date Acquired : 2/25/2022 9:34:52 PM  
 Date Processed : 2/25/2022 11:04:17 PM

<Chromatogram View>

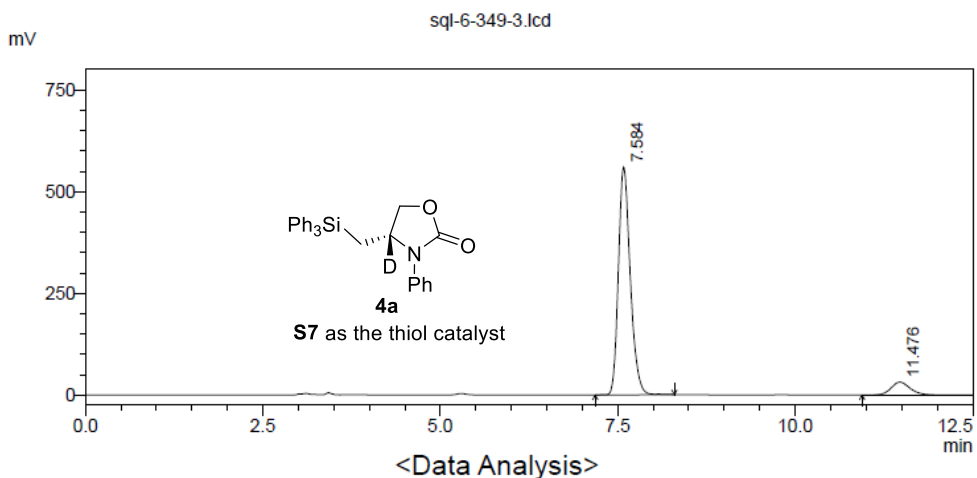

Detector A 214nm

| Pesck # | Ret. Time | Height | Area    | Area%   |
|---------|-----------|--------|---------|---------|
| 1       | 7.584     | 559691 | 6514632 | 91.624  |
| 2       | 11.476    | 31839  | 595547  | 8.376   |
| Total   |           | 591530 | 7110179 | 100.000 |

### Supplementary Figure 135. HPLC spectrum of **4a** (**S7** as the thiol catalyst)

### HPLC spectrum of **4a** (**S5** as the thiol catalyst)

Sample Name :  
 Tray# : 1  
 Vial# : 48  
 Data File : sql-7-82-1.lcd  
 Method File : 3AD-H-90-1-214.lcm  
 Date Acquired : 2/25/2022 11:05:43 PM  
 Date Processed : 2/25/2022 11:22:57 PM

<Chromatogram View>

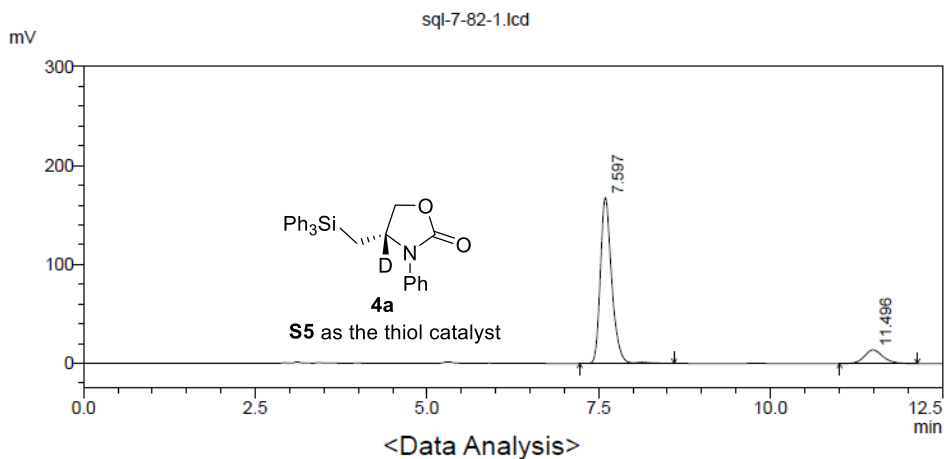

| Pesk # | Ret. Time | Height | Area    | Area%   |
|--------|-----------|--------|---------|---------|
| 1      | 7.597     | 167514 | 1925298 | 88.010  |
| 2      | 11.496    | 13904  | 262281  | 11.990  |
| Total  |           | 181417 | 2187579 | 100.000 |

### Supplementary Figure 136. HPLC spectrum of **4a** (**S5** as the thiol catalyst)

### HPLC spectrum of **4a** (**S1** as the thiol catalyst)

Sample Name :  
 Tray# : 1  
 Vial# : 13  
 Data File : SQL-7-15.lcd  
 Method File : 3AD-H-90-1-214.lcm  
 Date Acquired : 1/23/2022 3:29:41 PM  
 Date Processed : 2/28/2022 10:25:34 AM

<Chromatogram View>

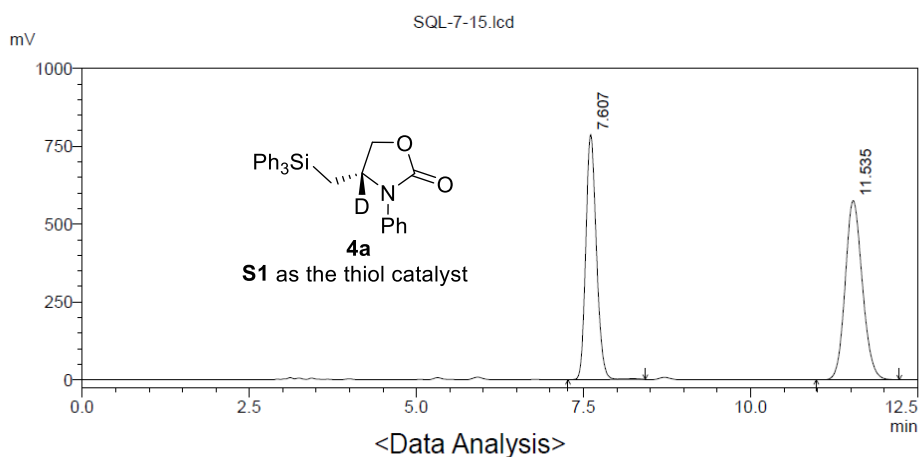

| Pesk # | Ret. Time | Height  | Area     | Area%   |
|--------|-----------|---------|----------|---------|
| 1      | 7.607     | 787175  | 8714383  | 45.855  |
| 2      | 11.535    | 575690  | 10289857 | 54.145  |
| Total  |           | 1362864 | 19004240 | 100.000 |

### Supplementary Figure 137. HPLC spectrum of **4a** (**S1** as the thiol catalyst)

<sup>1</sup>H NMR (400 MHz, room temperature, CDCl<sub>3</sub>)

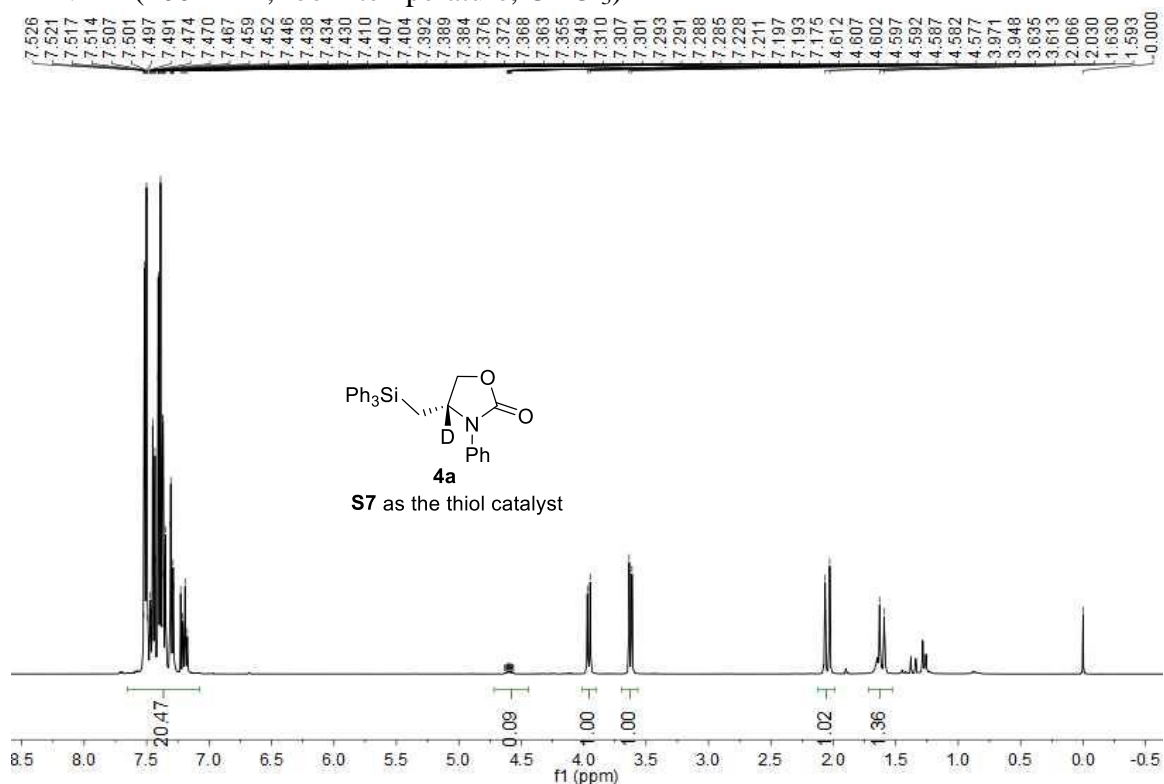

**Supplementary Figure 138.** <sup>1</sup>H NMR spectrum of compound **4a** (gram-scale reaction)

HPLC spectrum of racemic **4a**

Tray# : 1  
Vial# : 46  
Data File : sql-5-320-1.lcd  
Method File : 3AD-H-90-1-214.lcm  
Date Acquired : 2/25/2022 9:19:32 PM  
Date Processed : 2/25/2022 11:04:00 PM

<Chromatogram View>

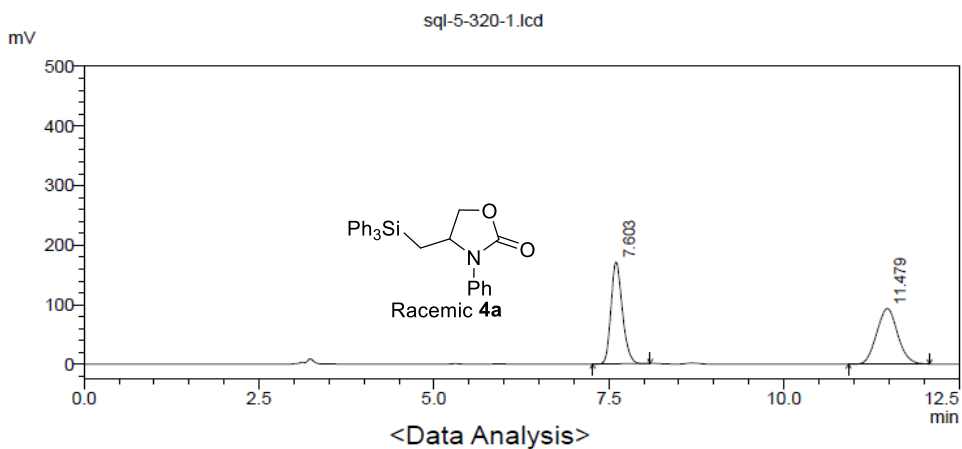

| Detector A 214nm |           |        |         |         |
|------------------|-----------|--------|---------|---------|
| Peak #           | Ret. Time | Height | Area    | Area%   |
| 1                | 7.603     | 170746 | 1930467 | 49.802  |
| 2                | 11.479    | 93099  | 1945791 | 50.198  |
| Total            |           | 263846 | 3876258 | 100.000 |

**Supplementary Figure 139.** HPLC spectrum of racemic **4a**

# HPLC spectrum of **4a** (gram-scale reaction)

Vial# : 4  
Data File : YXY-3-63.lcd  
Method File : 3AD-H-90-1-214.lcm  
Date Acquired : 6/8/2022 11:08:25 PM  
Date Processed : 6/8/2022 11:44:09 PM

<Chromatogram View>

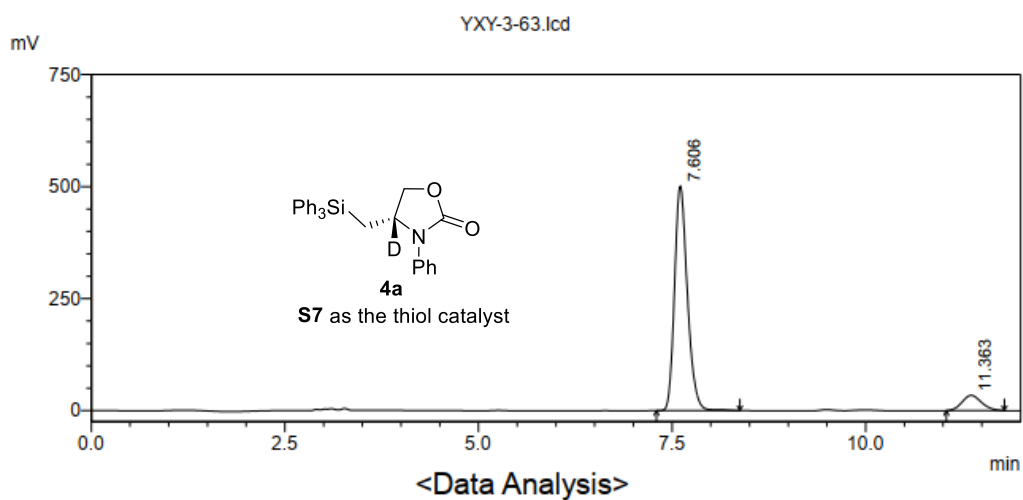

| Detector A 214nm |           |        |         |         |
|------------------|-----------|--------|---------|---------|
| Peak #           | Ret. Time | Height | Area    | Area%   |
| 1                | 7.606     | 500866 | 5797583 | 90.628  |
| 2                | 11.363    | 34056  | 599507  | 9.372   |
| Total            |           | 534922 | 6397091 | 100.000 |

Supplementary Figure 140. HPLC spectrum of **4a** (gram-scale reaction)

$^1\text{H}$  NMR (400 MHz, room temperature,  $\text{CDCl}_3$ )

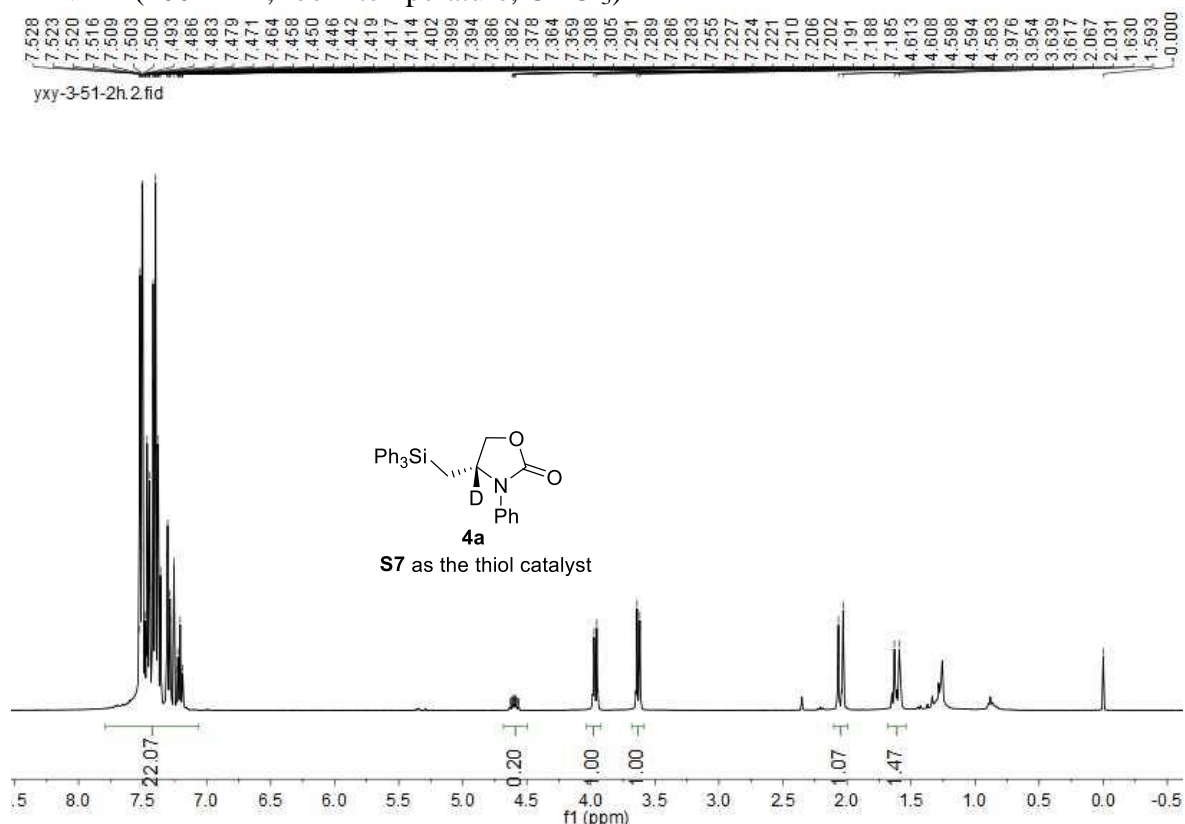

**Supplementary Figure 141.**  $^1\text{H}$  NMR spectrum of compound **4a** ( $\text{D}_2\text{O}$  recycled from a 0.6 mmol scale reaction)

HPLC spectrum of racemic **4a**

Tray# : 1  
Vial# : 46  
Data File : sql-5-320-1.lcd  
Method File : 3AD-H-90-1-214.lcm  
Date Acquired : 2/25/2022 9:19:32 PM  
Date Processed : 2/25/2022 11:04:00 PM

<Chromatogram View>

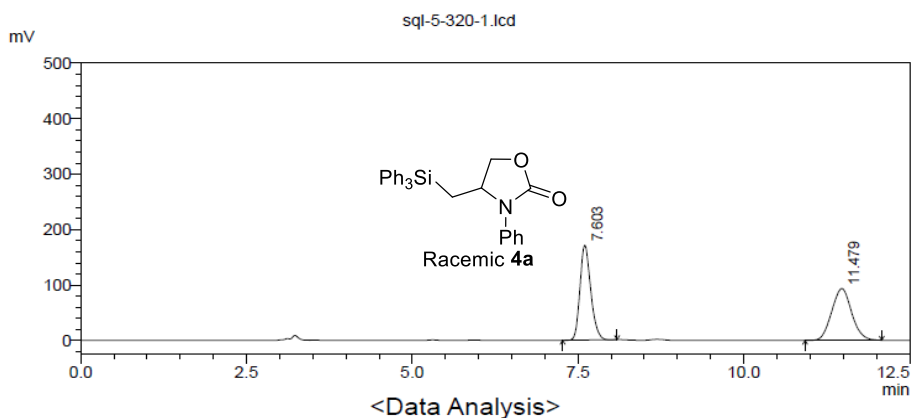

| Peak # | Ret. Time | Height | Area    | Area%   |
|--------|-----------|--------|---------|---------|
| 1      | 7.603     | 170746 | 1930467 | 49.802  |
| 2      | 11.479    | 93099  | 1945791 | 50.198  |
| Total  |           | 263846 | 3876258 | 100.000 |

**Supplementary Figure 142.** HPLC spectrum of racemic **4a**

HPLC spectrum of **4a** (D<sub>2</sub>O recycled from a 0.6 mmol scale reaction)

Vial# : 1  
 Data File : YXY-3-51-3.lcd  
 Method File : 3AD-H-90-1-214.lcm  
 Date Acquired : 5/29/2022 10:16:09 PM  
 Date Processed : 5/29/2022 10:28:38 PM

<Chromatogram View>

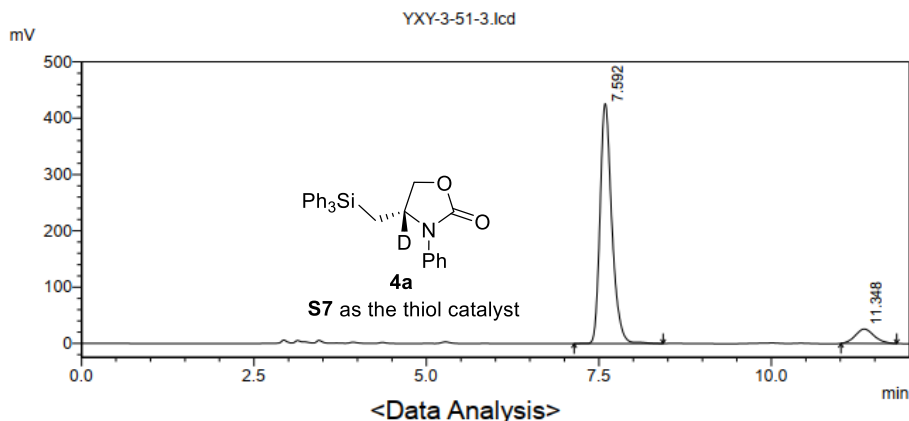

| Peak # | Ret. Time | Height | Area    | Area%   |
|--------|-----------|--------|---------|---------|
| 1      | 7.592     | 426414 | 5081760 | 91.247  |
| 2      | 11.348    | 25571  | 487469  | 8.753   |
| Total  |           | 451985 | 5569229 | 100.000 |

Supplementary Figure 143. HPLC spectrum of **4a** (D<sub>2</sub>O recycled from a 0.6 mmol scale reaction)

<sup>1</sup>H NMR (400 MHz, room temperature, CDCl<sub>3</sub>)

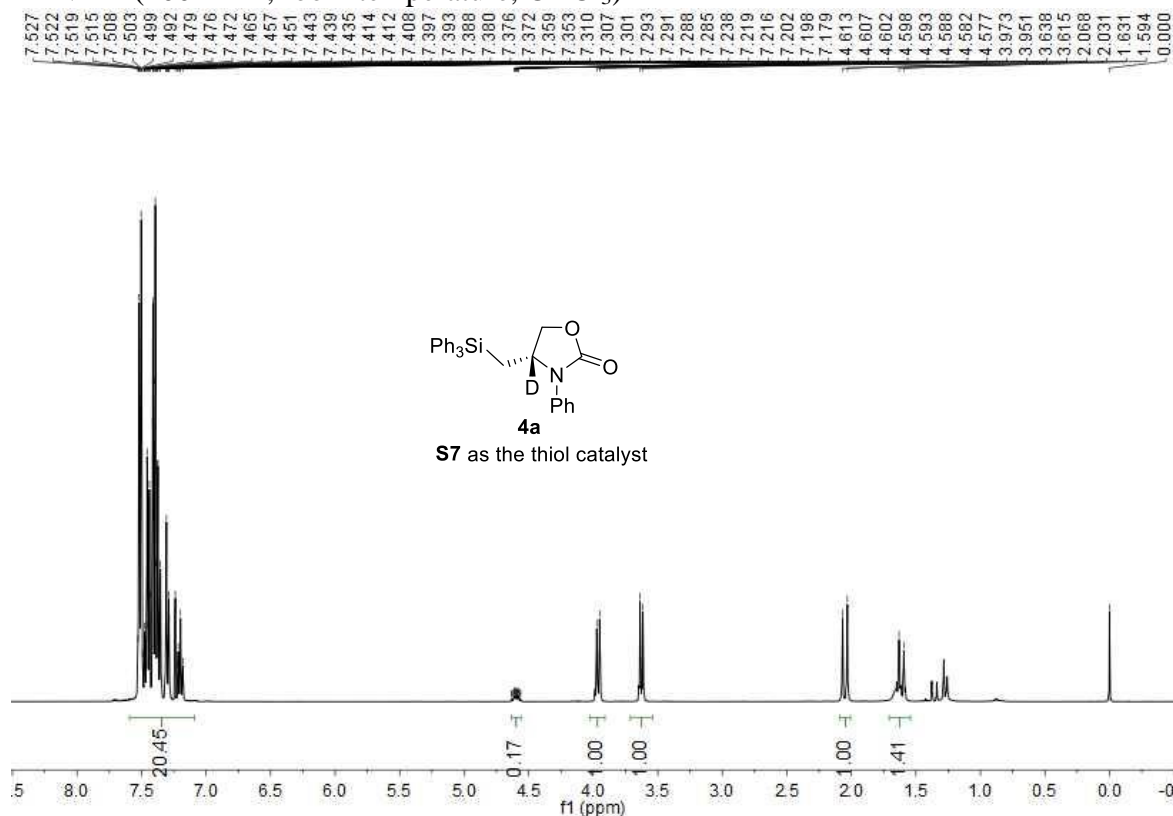

Supplementary Figure 144. <sup>1</sup>H NMR spectrum of compound **4a** (D<sub>2</sub>O recycled from a 3.0 mmol scale reaction)

## HPLC spectrum of racemic **4a**

Tray# : 1  
 Vial# : 46  
 Data File : sql-5-320-1.lcd  
 Method File : 3AD-H-90-1-214.lcm  
 Date Acquired : 2/25/2022 9:19:32 PM  
 Date Processed : 2/25/2022 11:04:00 PM

<Chromatogram View>

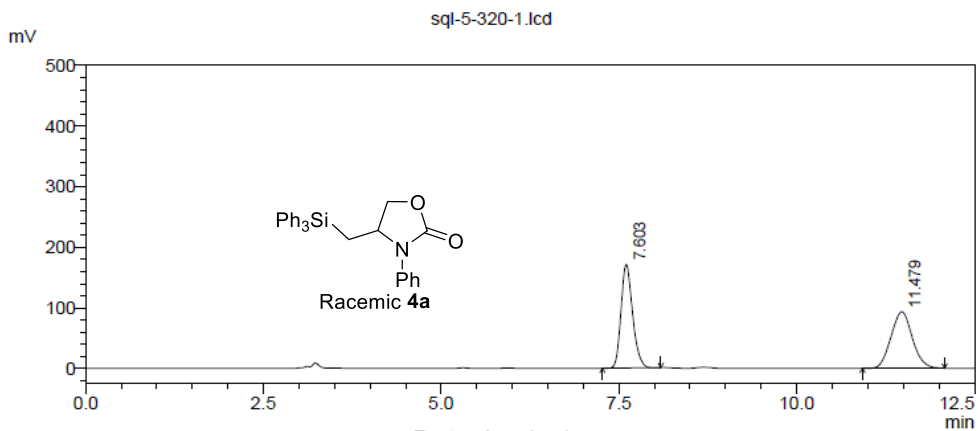

<Data Analysis>

Detector A 214nm

| Pesk # | Ret. Time | Height | Area    | Area%   |
|--------|-----------|--------|---------|---------|
| 1      | 7.603     | 170746 | 1930467 | 49.802  |
| 2      | 11.479    | 93099  | 1945791 | 50.198  |
| Total  |           | 263846 | 3876258 | 100.000 |

## Supplementary Figure 145. HPLC spectrum of racemic **4a**

HPLC spectrum of **4a** (D<sub>2</sub>O recycled from a 3.0 mmol scale reaction)

Vial# : 30  
 Data File : sql-7-151-2.lcd  
 Method File : 3AD-H-90-1-214.lcm  
 Date Acquired : 6/16/2022 6:28:30 PM  
 Date Processed : 6/16/2022 8:47:33 PM

<Chromatogram View>

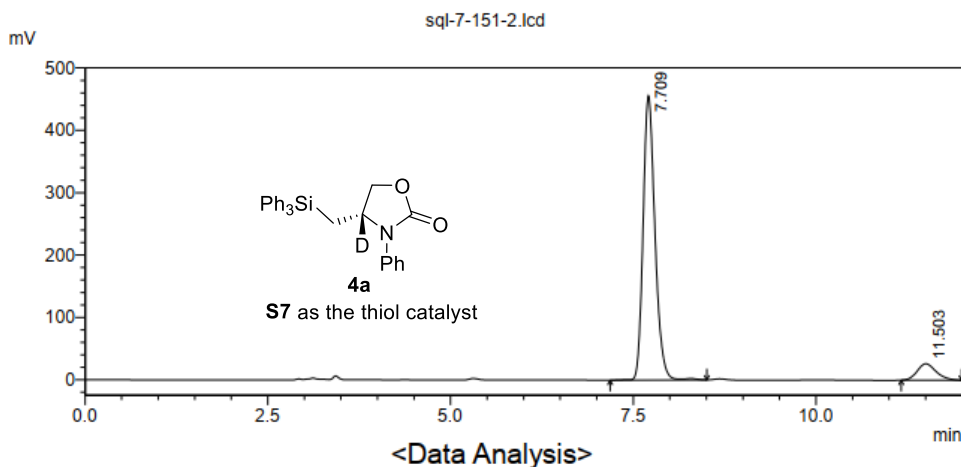

<Data Analysis>

Detector A 214nm

| Pesk # | Ret. Time | Height | Area    | Area%   |
|--------|-----------|--------|---------|---------|
| 1      | 7.709     | 455265 | 5151763 | 91.536  |
| 2      | 11.503    | 26354  | 476381  | 8.464   |
| Total  |           | 481620 | 5628145 | 100.000 |

## Supplementary Figure 146. HPLC spectrum of **4a** (D<sub>2</sub>O recycled from a 3.0 mmol scale reaction)

<sup>1</sup>H NMR (400 MHz, room temperature, CDCl<sub>3</sub>)

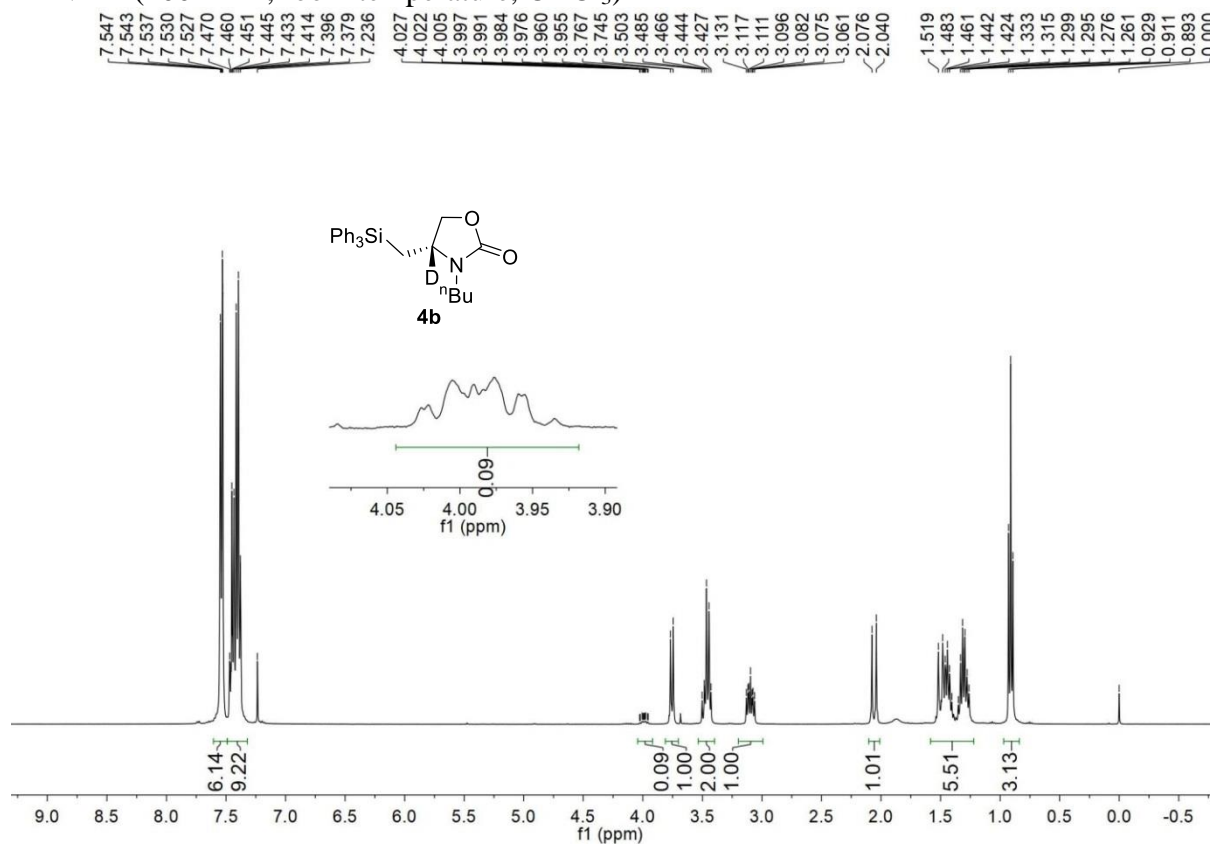

Supplementary Figure 147. <sup>1</sup>H NMR spectrum of compound **4b**

<sup>13</sup>C NMR (100 MHz, room temperature, CDCl<sub>3</sub>)

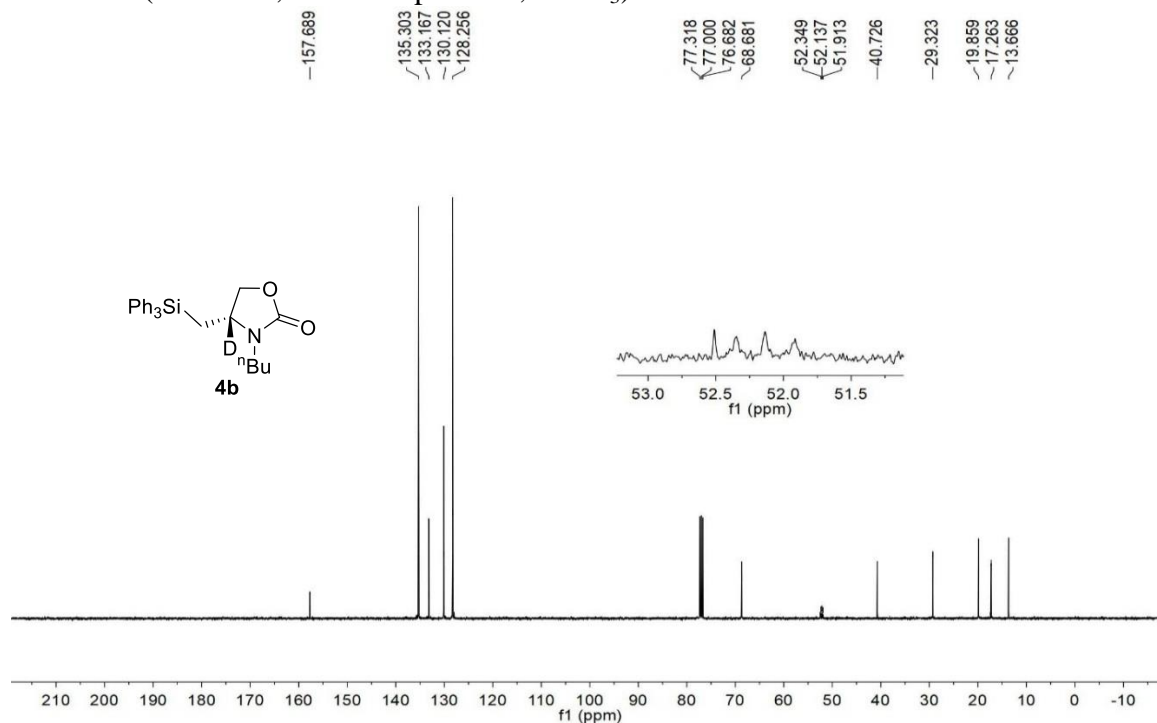

Supplementary Figure 148. <sup>13</sup>C NMR spectrum of compound **4b**



### HPLC spectrum of racemic **4b**

Data File : 21-RACEMIC-SQL-5-379-1.lcd  
 Method File : 3AD-H-96-1-214-20min.lcm  
 Date Processed : 8/8/2021 12:13:54 PM

<Chromatogram View>

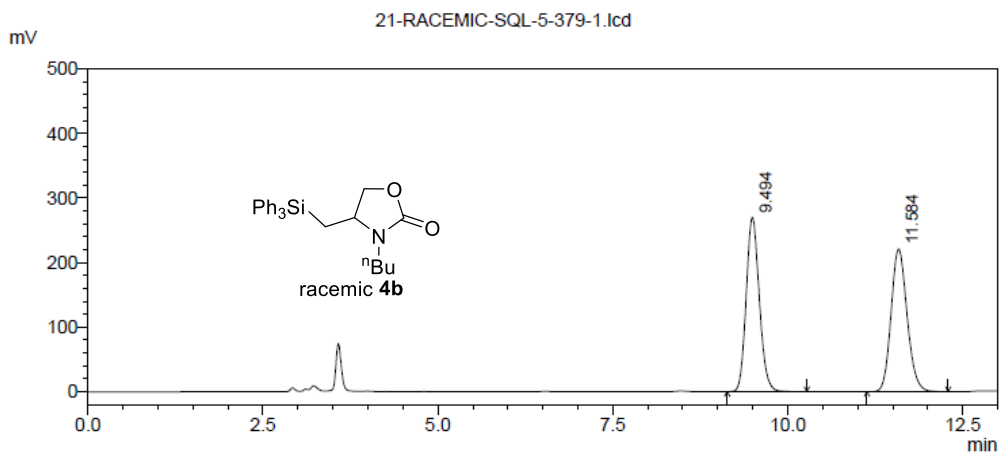

<Data Analysis>

| Detector A 214nm |           |        |         |         |
|------------------|-----------|--------|---------|---------|
| Pesk #           | Ret. Time | Height | Area    | Area%   |
| 1                | 9.494     | 269516 | 3515563 | 49.980  |
| 2                | 11.584    | 220736 | 3518428 | 50.020  |
| Total            |           | 490252 | 7033991 | 100.000 |

### Supplementary Figure 149. HPLC spectrum of racemic **4b**

### HPLC spectrum of **4b**

Data File : 21-CHIRAL-SQL-5-380.lcd  
 Method File : 3AD-H-96-1-214-20min.lcm  
 Date Processed : 8/8/2021 12:14:28 PM

<Chromatogram View>

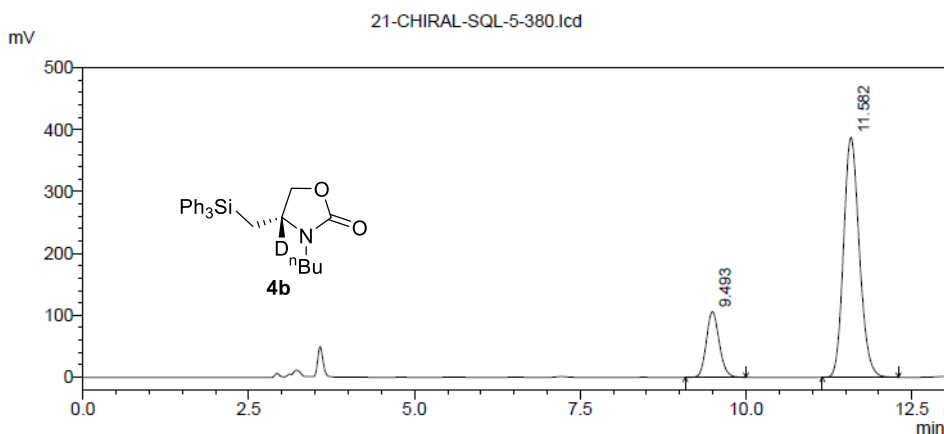

<Data Analysis>

| Detector A 214nm |           |        |         |         |
|------------------|-----------|--------|---------|---------|
| Pesk #           | Ret. Time | Height | Area    | Area%   |
| 1                | 9.493     | 106044 | 1432051 | 18.253  |
| 2                | 11.582    | 387117 | 6413398 | 81.747  |
| Total            |           | 493161 | 7845449 | 100.000 |

### Supplementary Figure 150. HPLC spectrum of **4b**

<sup>1</sup>H NMR (400 MHz, room temperature, CDCl<sub>3</sub>)

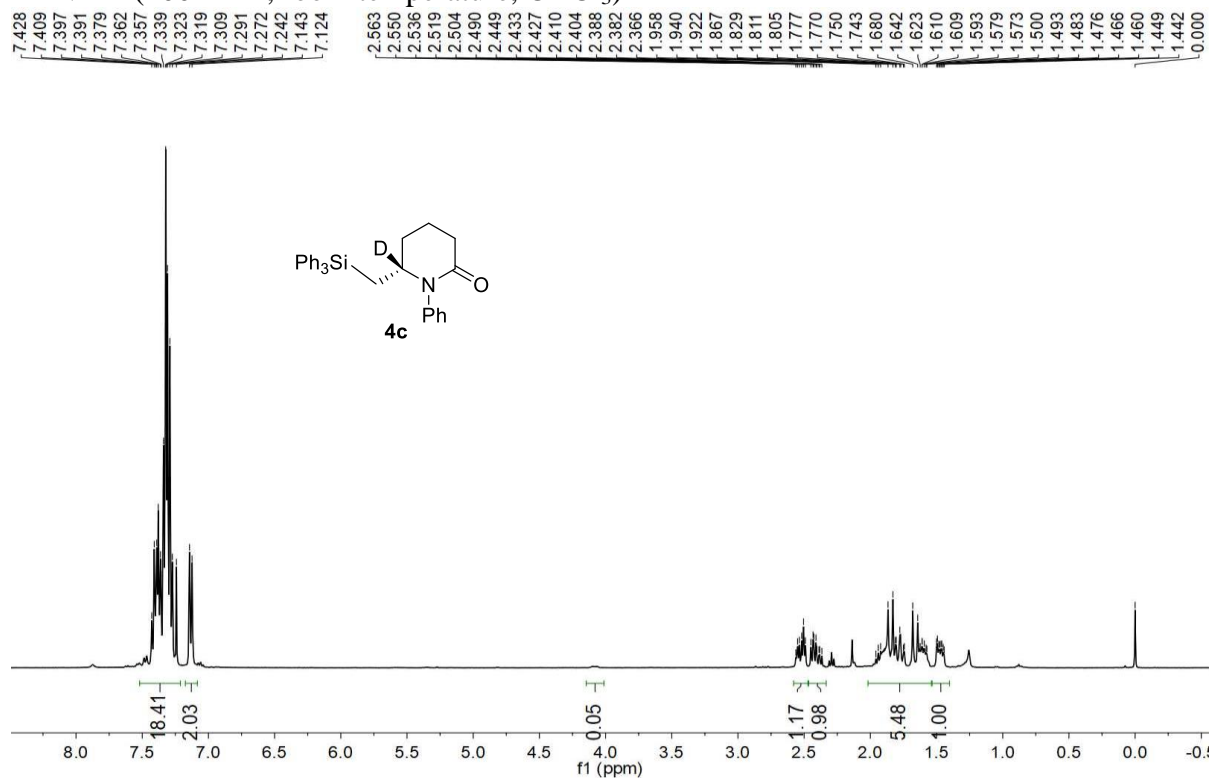

Supplementary Figure 151. <sup>1</sup>H NMR spectrum of compound **4c**

<sup>13</sup>C NMR (100 MHz, room temperature, CDCl<sub>3</sub>)

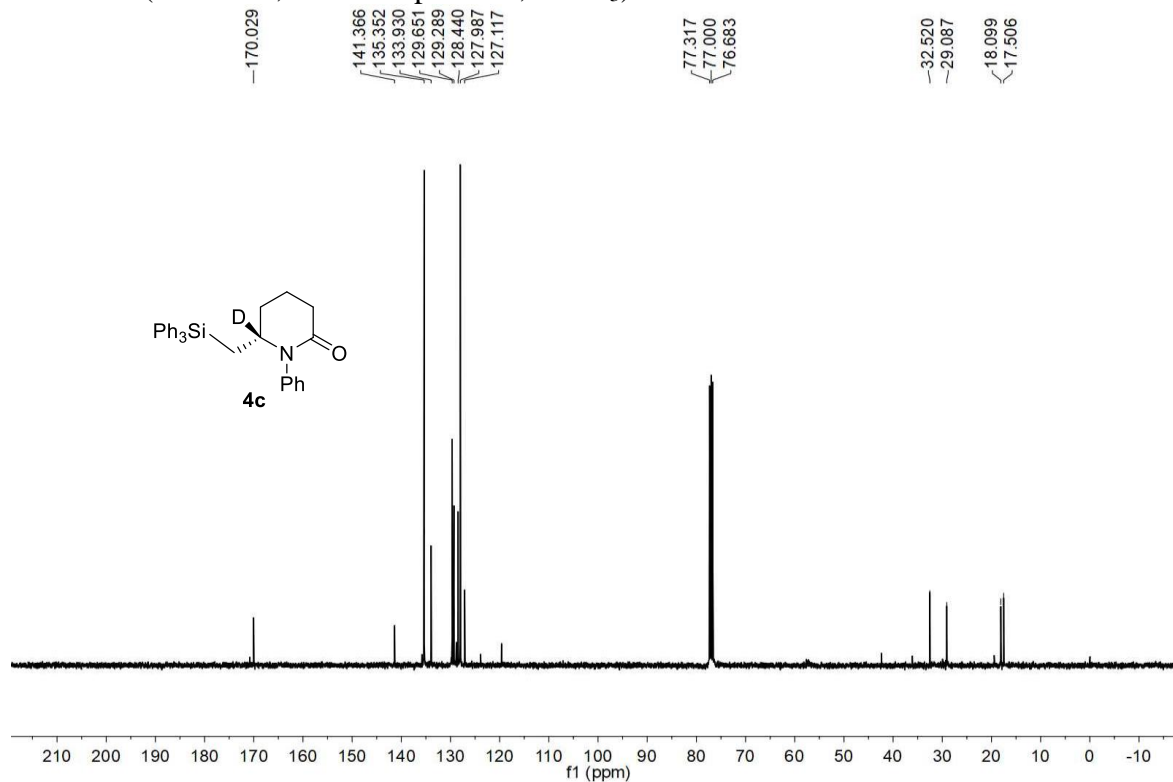

Supplementary Figure 152. <sup>13</sup>C NMR spectrum of compound **4c**

### HPLC spectrum of racemic 4c

Sample Name :  
 Tray# : 1  
 Vial# : 46  
 Data File : SQL-6-391-1-4.lcd  
 Method File : 3AD-H-80-0.5-214.lcm  
 Date Acquired : 1/24/2022 7:21:08 PM  
 Date Processed : 1/24/2022 7:46:22 PM

<Chromatogram View>

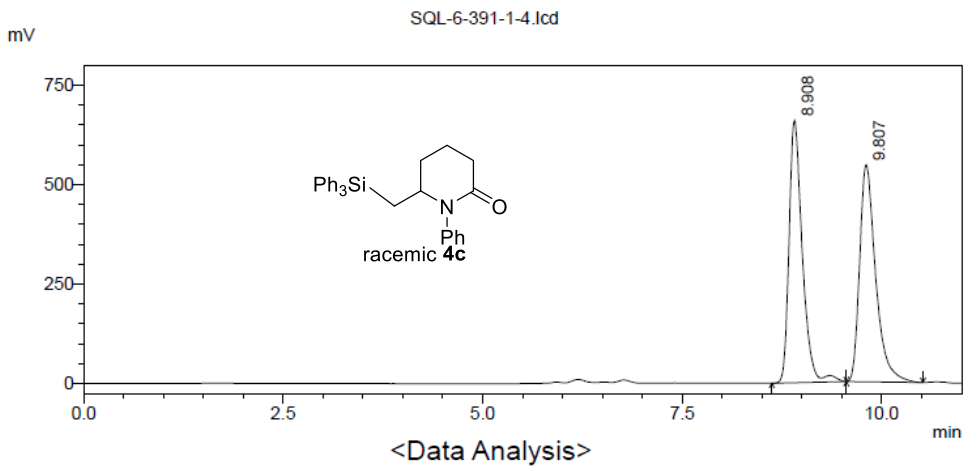

Detector A 214nm

| Peak # | Ret. Time | Height  | Area     | Area%   |
|--------|-----------|---------|----------|---------|
| 1      | 8.908     | 659428  | 7613217  | 49.931  |
| 2      | 9.807     | 545984  | 7634394  | 50.069  |
| Total  |           | 1205413 | 15247611 | 100.000 |

### Supplementary Figure 153. HPLC spectrum of racemic 4c

### HPLC spectrum of 4c

Sample name :  
 Tray# : 1  
 Vial# : 47  
 Data File : SQL-7-35-1-1.lcd  
 Method File : 3AD-H-80-0.5-214.lcm  
 Date Acquired : 1/24/2022 7:47:15 PM  
 Date Processed : 1/24/2022 8:12:39 PM

<Chromatogram View>

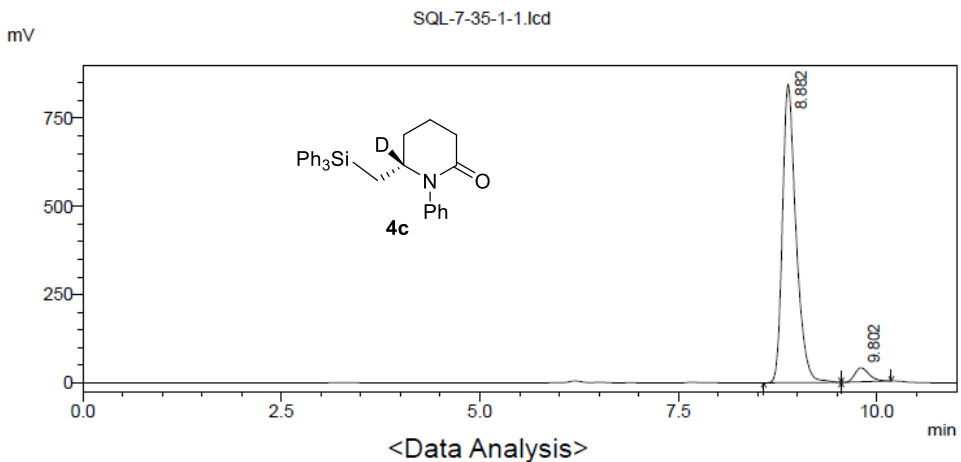

Detector A 214nm

| Peak # | Ret. Time | Height | Area     | Area%   |
|--------|-----------|--------|----------|---------|
| 1      | 8.882     | 845322 | 10063358 | 95.246  |
| 2      | 9.802     | 40029  | 502270   | 4.754   |
| Total  |           | 885351 | 10565628 | 100.000 |

### Supplementary Figure 154. HPLC spectrum of 4c

$^1\text{H}$  NMR (400 MHz, room temperature,  $\text{CDCl}_3$ )

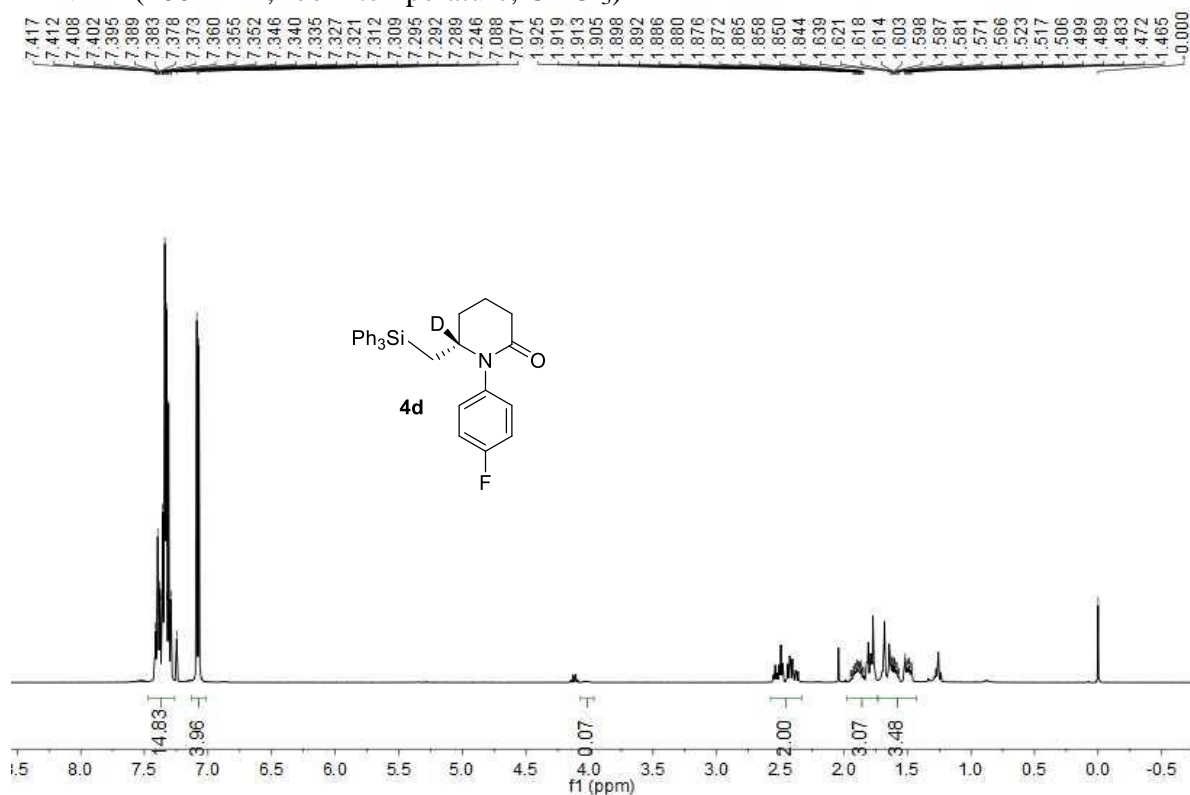

Supplementary Figure 155.  $^1\text{H}$  NMR spectrum of compound **4d**

$^{13}\text{C}$  NMR (100 MHz, room temperature,  $\text{CDCl}_3$ )

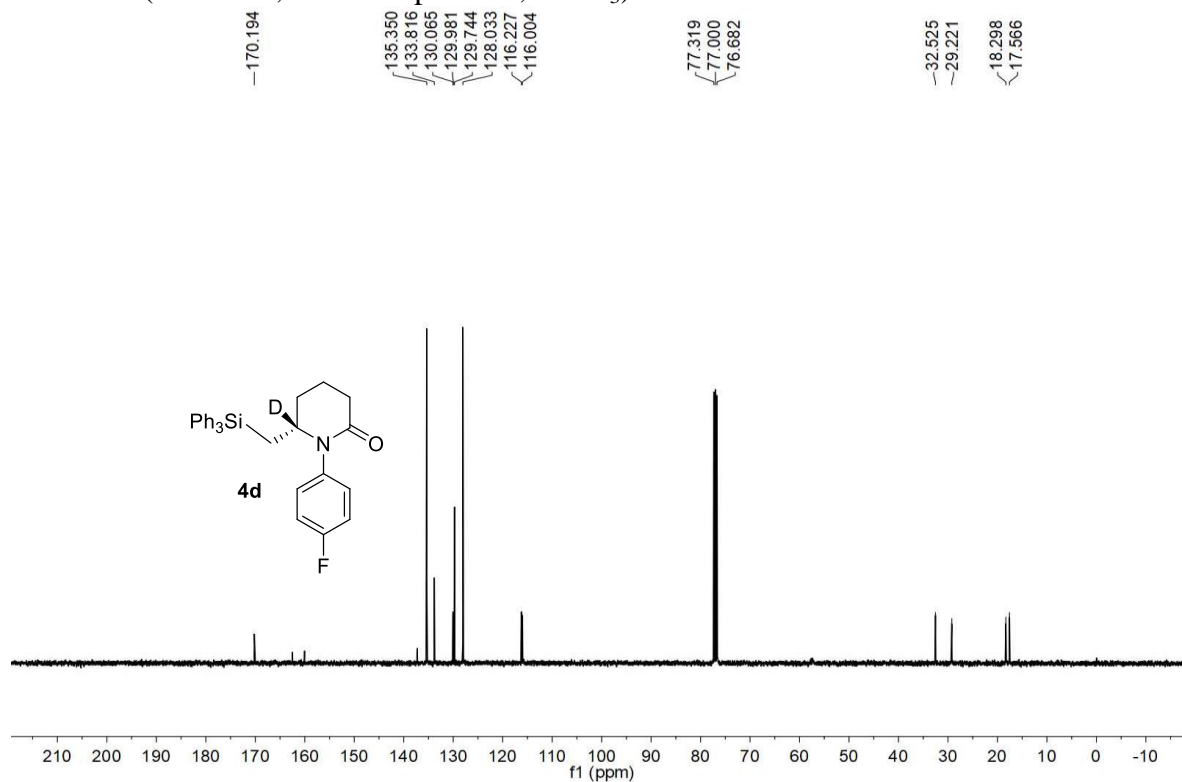

Supplementary Figure 156.  $^{13}\text{C}$  NMR spectrum of compound **4d**

$^{19}\text{F}$  NMR (376 MHz, room temperature,  $\text{CDCl}_3$ )

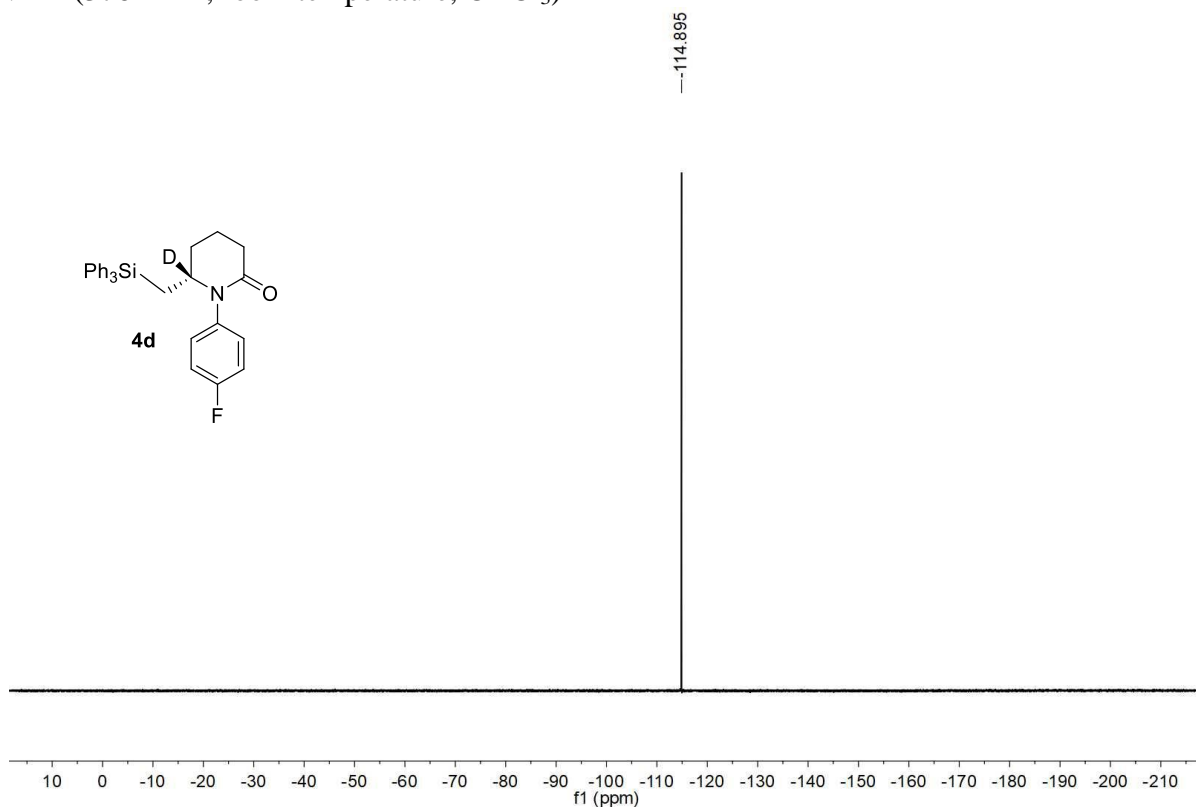

Supplementary Figure 157.  $^{19}\text{F}$  NMR spectrum of compound **4d**

HPLC spectrum of racemic **4d**

Sample Name :  
Tray# : 1  
Vial# : 20  
Data File : sql-7-72-1.lcd  
Method File : 4OD-H-80-0.5-214.lcm  
Date Acquired : 2/20/2022 11:00:16 PM  
Date Processed : 2/20/2022 11:32:56 PM

<Chromatogram View>

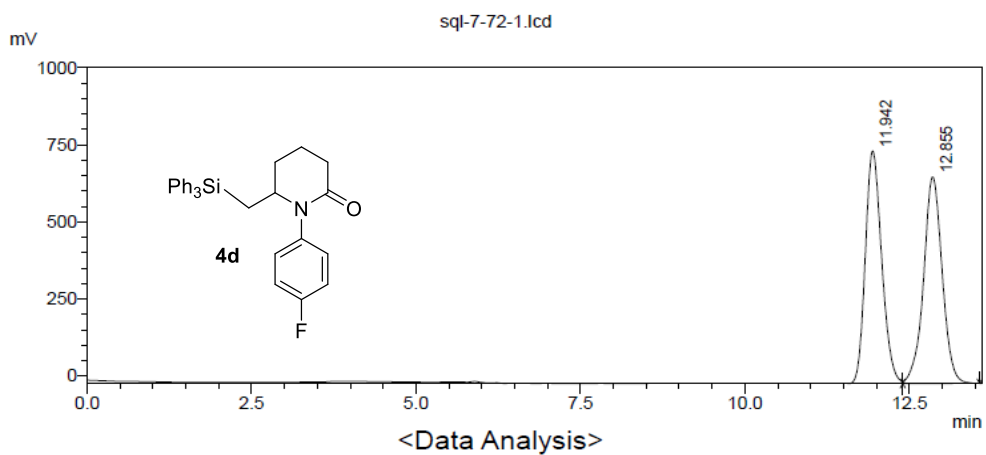

Detector A 214nm

| Peak # | Ret. Time | Height  | Area     | Area%   |
|--------|-----------|---------|----------|---------|
| 1      | 11.942    | 755590  | 13124785 | 49.793  |
| 2      | 12.855    | 670987  | 13234119 | 50.207  |
| Total  |           | 1426577 | 26358903 | 100.000 |

Supplementary Figure 158. HPLC spectrum of racemic **4d**

### HPLC spectrum of 4d

Sample name :  
 Tray# : 1  
 Vial# : 20  
 Data File : sql-7-72-2.lcd  
 Method File : 4OD-H-80-0.5-214.lcm  
 Date Acquired : 2/20/2022 11:18:36 PM  
 Date Processed : 2/20/2022 11:32:54 PM

<Chromatogram View>

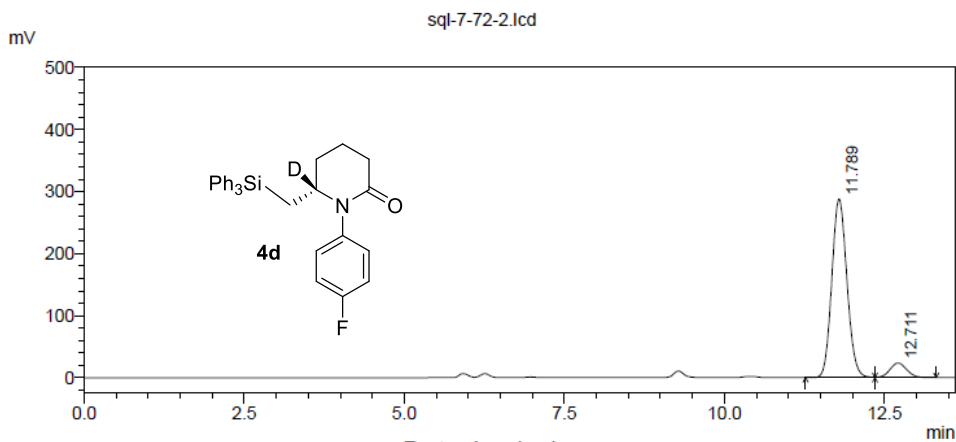

<Data Analysis>

| Peak # | Ret. Time | Height | Area    | Area%   |
|--------|-----------|--------|---------|---------|
| 1      | 11.789    | 287861 | 4734270 | 91.669  |
| 2      | 12.711    | 23476  | 430266  | 8.331   |
| Total  |           | 311337 | 5164537 | 100.000 |

### Supplementary Figure 159. HPLC spectrum of 4d

<sup>1</sup>H NMR (400 MHz, room temperature, CDCl<sub>3</sub>)

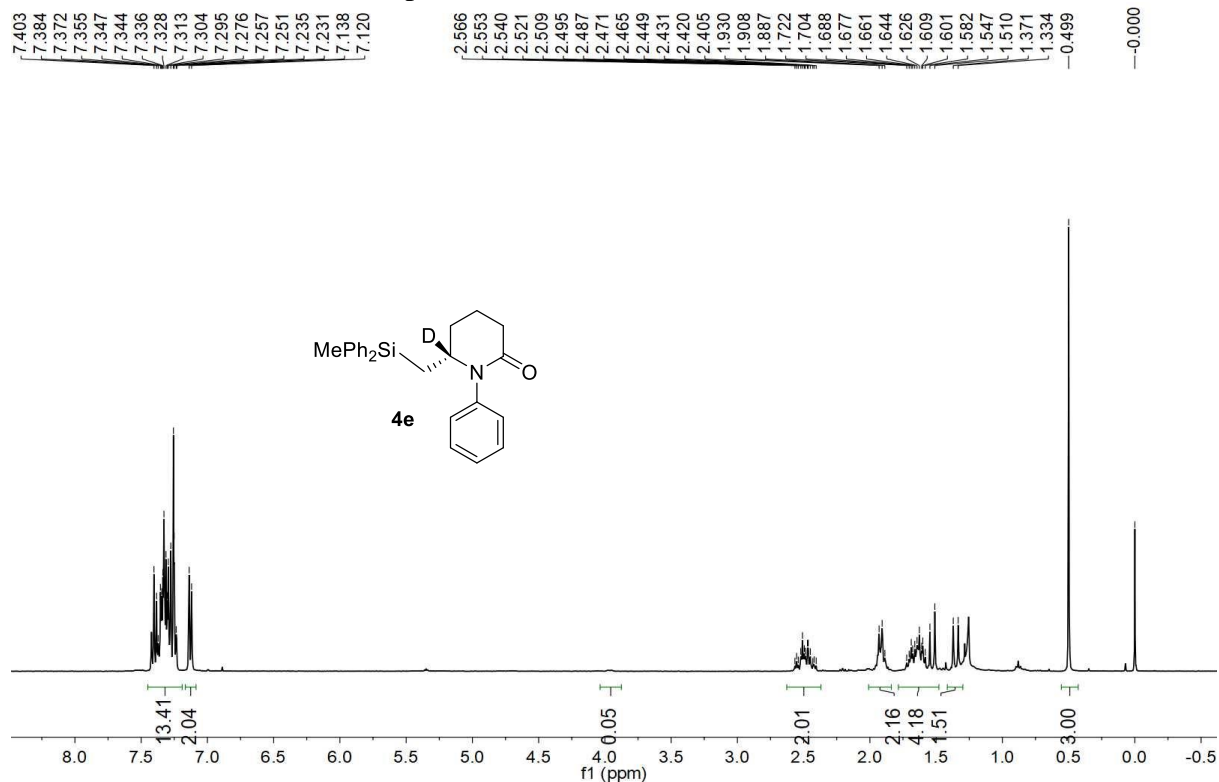

### Supplementary Figure 160. <sup>1</sup>H NMR spectrum of compound 4e

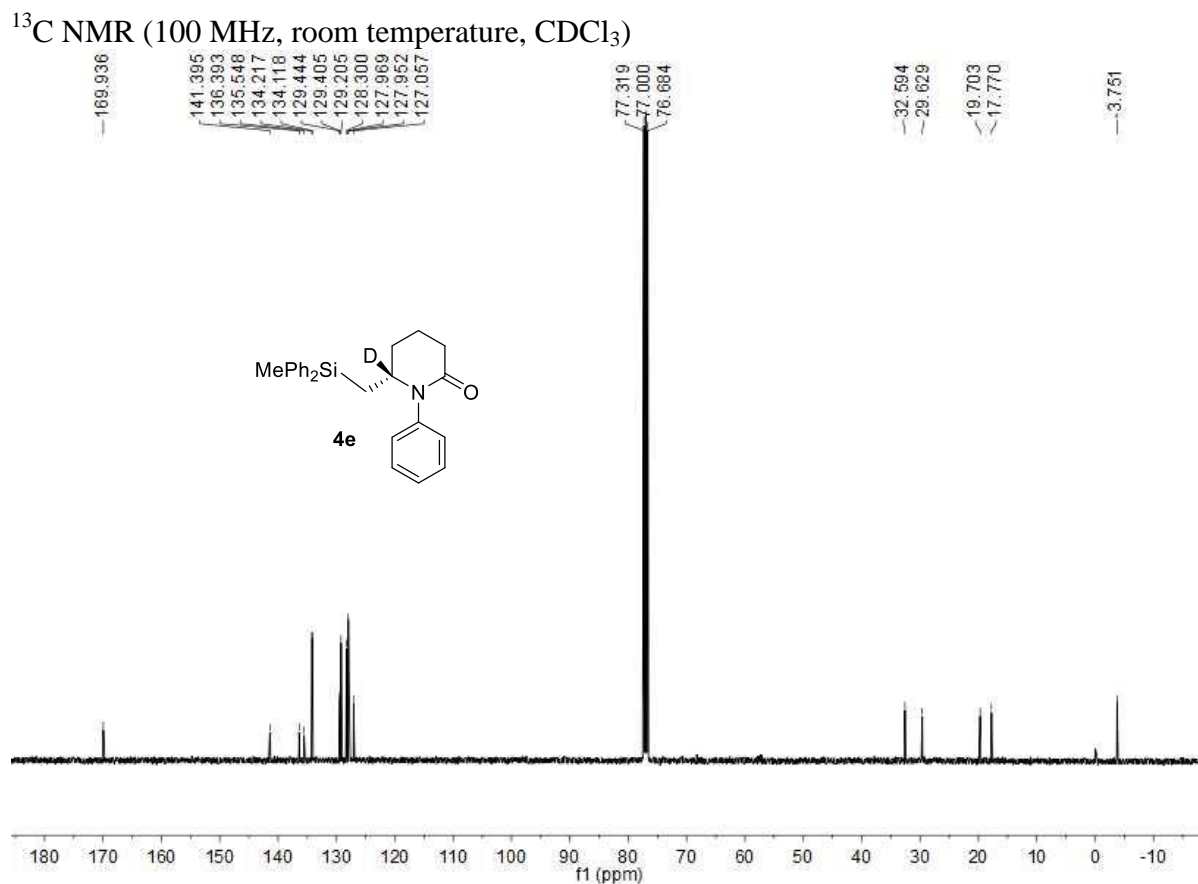

Supplementary Figure 161.  $^{13}\text{C}$  NMR spectrum of compound **4e**

HPLC spectrum of racemic **4e**

Sample Name :  
 Tray# : 1  
 Vial# : 28  
 Data File : sql-7-59-1-8.lcd  
 Method File : 4OD-H-90-0.5-214.lcm  
 Date Acquired : 2/20/2022 12:03:21 AM  
 Date Processed : 2/20/2022 2:44:47 PM

<Chromatogram View>

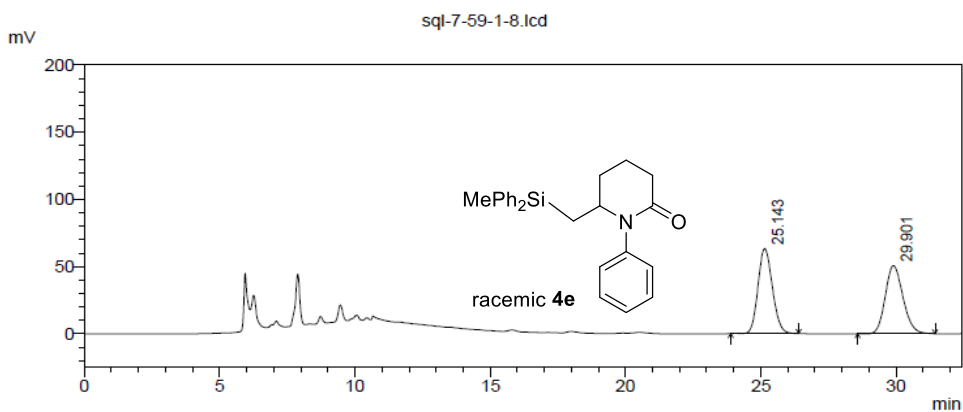

<Data Analysis>

| Detector A 214nm |           |        |         |         |
|------------------|-----------|--------|---------|---------|
| Peak #           | Ret. Time | Height | Area    | Area%   |
| 1                | 25.143    | 63250  | 2336532 | 50.383  |
| 2                | 29.901    | 50652  | 2301045 | 49.617  |
| Total            |           | 113901 | 4637577 | 100.000 |

Supplementary Figure 162. HPLC spectrum of racemic **4e**

### HPLC spectrum of 4e

Sample Name :  
 Tray# : 1  
 Vial# : 30  
 Data File : sql-7-71-2-4.lcd  
 Method File : 40D-H-90-0.5-214.lcm  
 Date Acquired : 2/20/2022 12:54:26 AM  
 Date Processed : 2/20/2022 7:19:19 PM

<Chromatogram View>

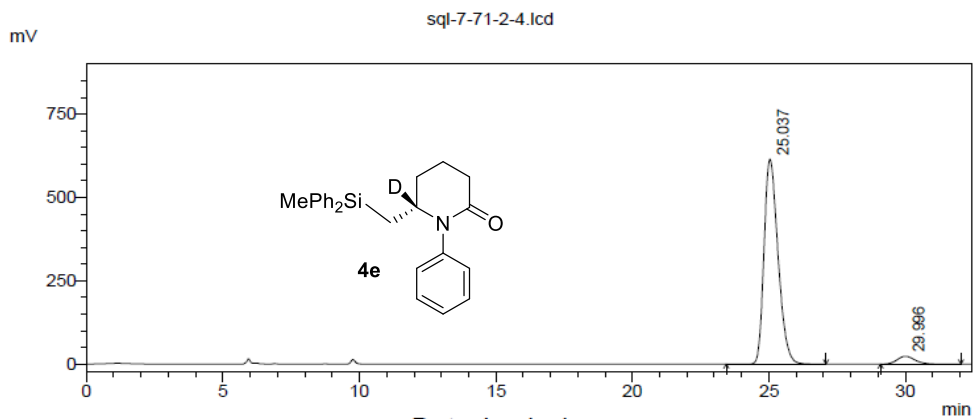

<Data Analysis>

| Detector A 214nm |           |        |          |         |
|------------------|-----------|--------|----------|---------|
| Peak #           | Ret. Time | Height | Area     | Area%   |
| 1                | 25.037    | 615357 | 21893091 | 95.374  |
| 2                | 29.996    | 23471  | 1061837  | 4.626   |
| Total            |           | 638829 | 22954928 | 100.000 |

### Supplementary Figure 163. HPLC spectrum of 4e

<sup>1</sup>H NMR (400 MHz, room temperature, CDCl<sub>3</sub>)

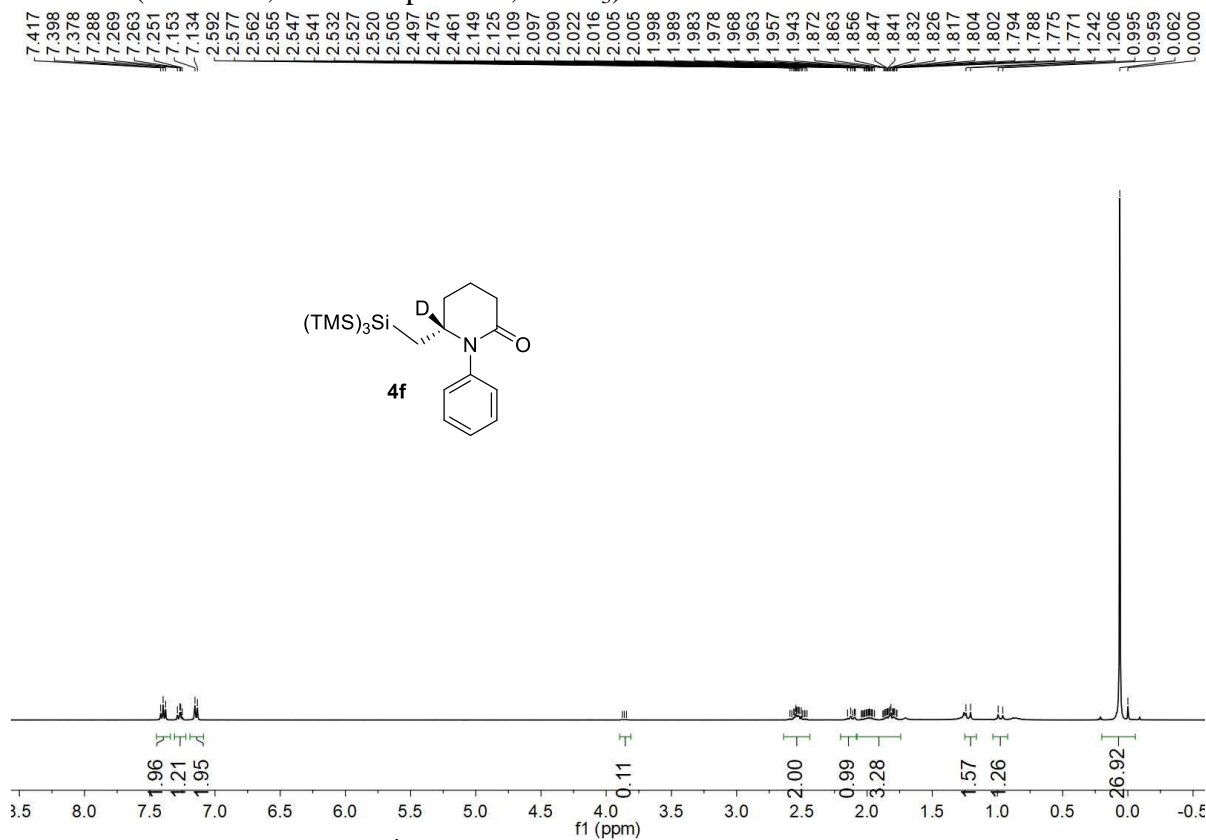

### Supplementary Figure 164. <sup>1</sup>H NMR spectrum of compound 4f



$^{13}\text{C}$  NMR (100 MHz, room temperature,  $\text{CDCl}_3$ )

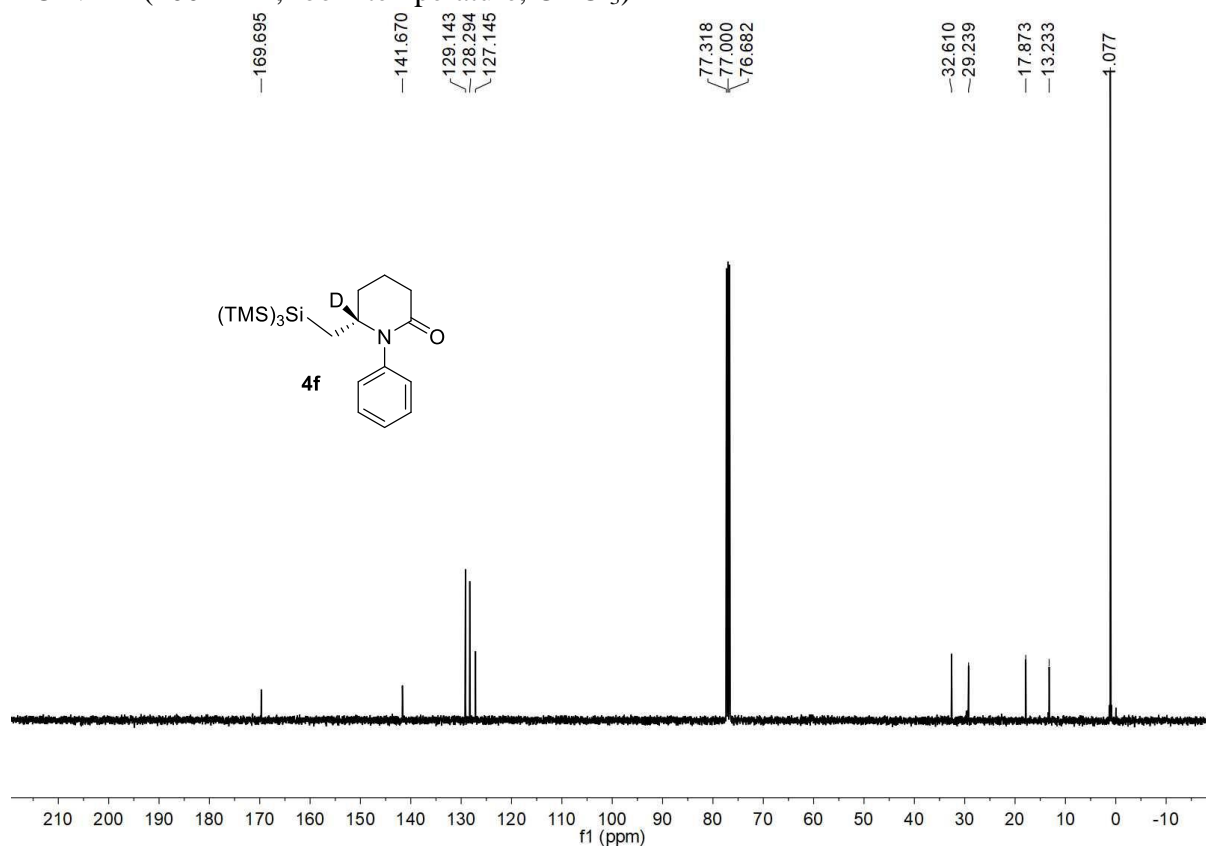

**Supplementary Figure 165.**  $^{13}\text{C}$  NMR spectrum of compound **4f**

HPLC spectrum of racemic **4f**

Sample Name :  
Tray# : 1  
Vial# : 19  
Data File : sql-7-58-1.lcd  
Method File : 4OD-H-90-0.5-214.lcm  
Date Acquired : 2/16/2022 12:59:30 AM  
Date Processed : 2/16/2022 1:18:36 AM

<Chromatogram View>

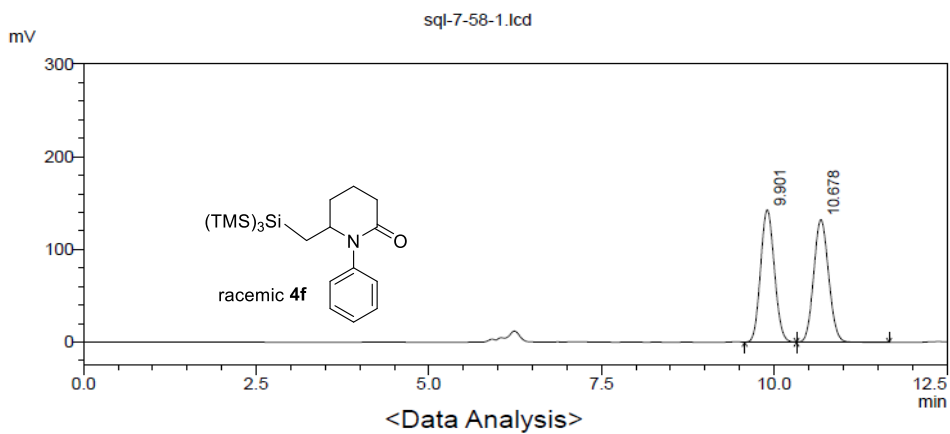

Detector A 214nm

| Peak # | Ret. Time | Height | Area    | Area%   |
|--------|-----------|--------|---------|---------|
| 1      | 9.901     | 142973 | 1996484 | 50.066  |
| 2      | 10.678    | 132311 | 1991205 | 49.934  |
| Total  |           | 275284 | 3987689 | 100.000 |

**Supplementary Figure 166.** HPLC spectrum of racemic **4f**

### HPLC spectrum of 4f

Sample Name :  
 Tray# : 1  
 Vial# : 20  
 Data File : sql-7-58-2.lcd  
 Method File : 4OD-H-90-0.5-214.lcm  
 Date Acquired : 2/16/2022 1:40:28 AM  
 Date Processed : 2/16/2022 1:53:57 AM

<Chromatogram View>

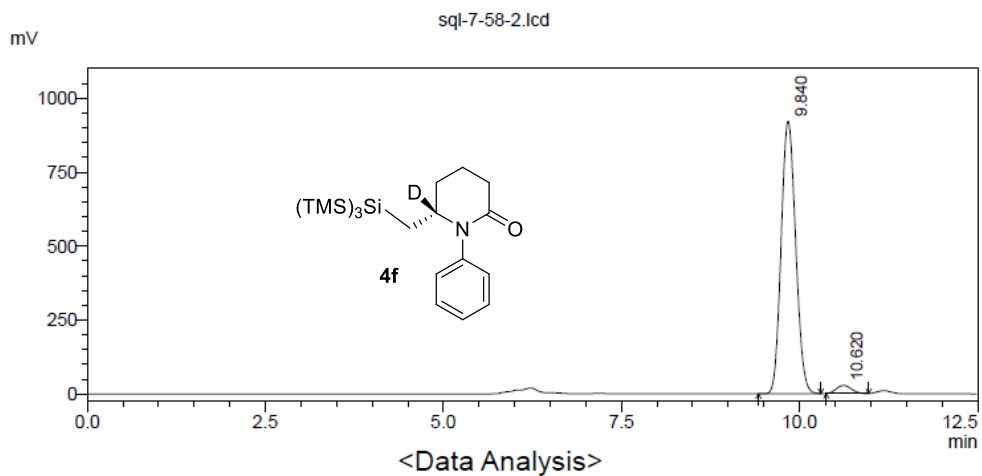

Detector A 214nm

| Peak # | Ret. Time | Height | Area     | Area%   |
|--------|-----------|--------|----------|---------|
| 1      | 9.840     | 921183 | 13039350 | 97.050  |
| 2      | 10.620    | 27517  | 396394   | 2.950   |
| Total  |           | 948700 | 13435745 | 100.000 |

### Supplementary Figure 167. HPLC spectrum of 4f

<sup>1</sup>H NMR (400 MHz, room temperature, CDCl<sub>3</sub>)

7.561, 7.557, 7.553, 7.547, 7.541, 7.537, 7.494, 7.490, 7.487, 7.479, 7.474, 7.470, 7.465, 7.451, 7.451, 7.434, 7.432, 7.429, 7.423, 7.418, 7.414, 7.409, 7.405, 7.401, 7.397, 7.393, 7.387, 7.378, 7.376, 7.372, 7.369, 7.366, 7.361, 7.357, 7.353, 7.348, 7.343, 7.341, 7.305, 7.302, 7.286, 7.283, 7.280, 7.251, 7.202, 7.184, 4.915, 4.907, 4.902, 4.895, 4.868, 4.836, 4.336, 3.987, 3.965, 1.842, 1.830, 1.805, 1.793, 0.000

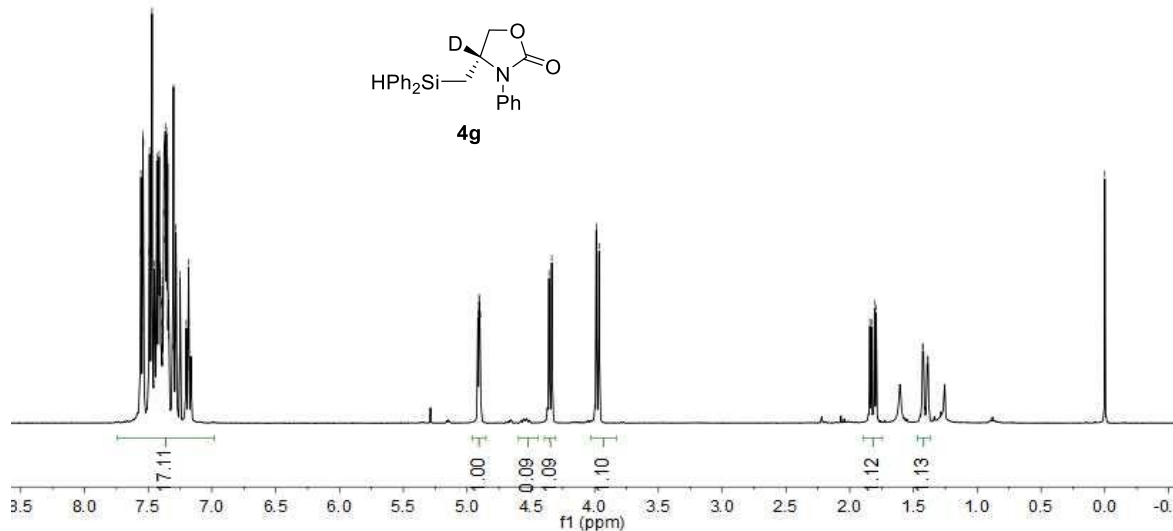

### Supplementary Figure 168. <sup>1</sup>H NMR spectrum of compound 4g

$^{13}\text{C}$  NMR (100 MHz, room temperature,  $\text{CDCl}_3$ )

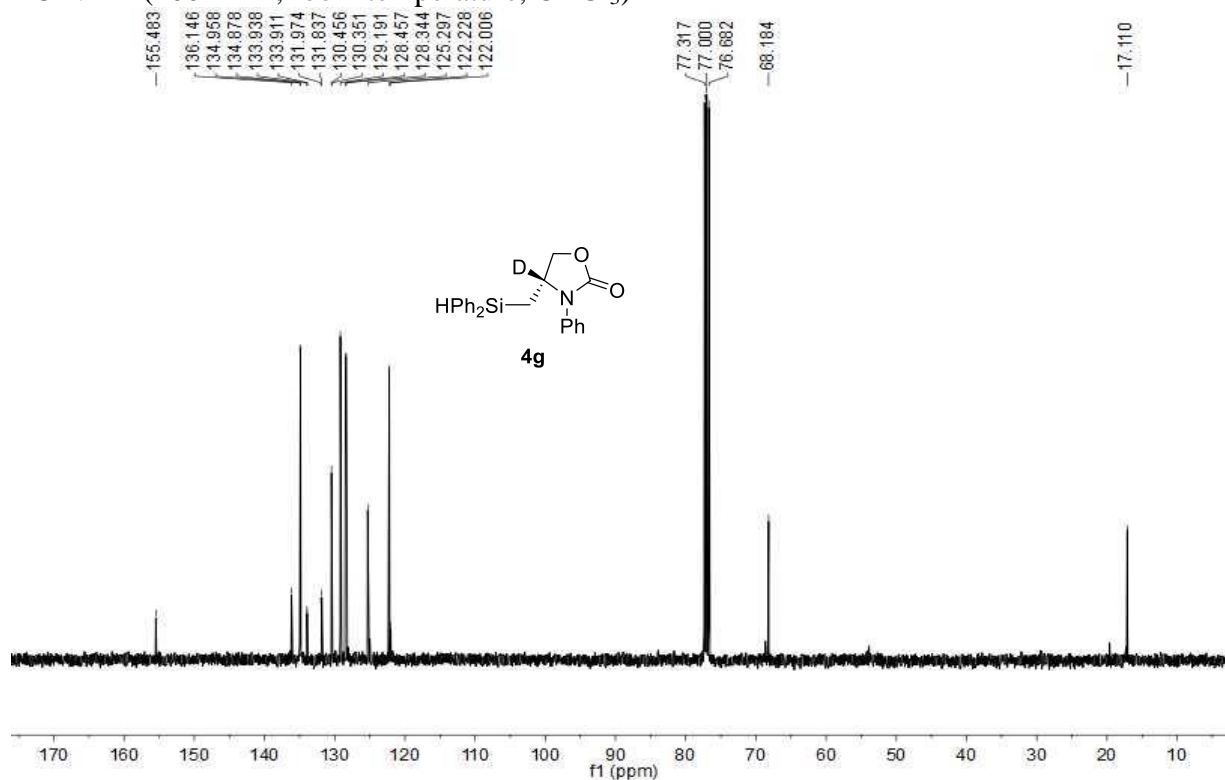

Supplementary Figure 169.  $^{13}\text{C}$  NMR spectrum of compound **4g**

HPLC spectrum of racemic **4g**

Tray# : 1  
 Vial# : 22  
 Data File : sql-6-404-1-2.lcd  
 Method File : 3AD-H-80-1-214.lcm  
 Date Acquired : 1/19/2022 8:39:28 PM  
 Date Processed : 1/19/2022 9:02:27 PM

<Chromatogram View>

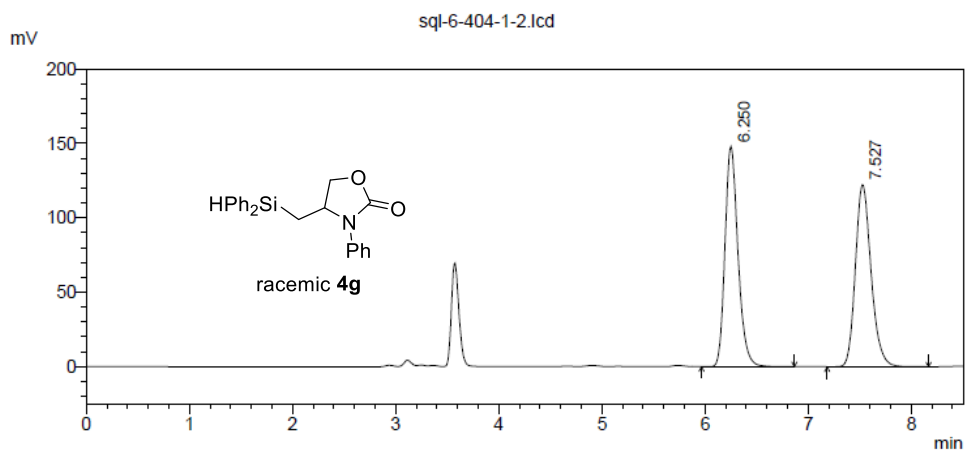

<Data Analysis>

| Detector A 214nm |           |        |         |         |
|------------------|-----------|--------|---------|---------|
| Pesk #           | Ret. Time | Height | Area    | Area%   |
| 1                | 6.250     | 148224 | 1298577 | 50.014  |
| 2                | 7.527     | 122521 | 1297852 | 49.986  |
| Total            |           | 270745 | 2596429 | 100.000 |

Supplementary Figure 170. HPLC spectrum of racemic **4g**

### HPLC spectrum of 4g

1:ray# : 1  
 47:Vial# : 47  
 YXY-2-225B.lcd:Data File :  
 3AD-H-80-1-214.lcm:Method File :  
 1/23/2022 11:39:12 PM>Date Acquired :  
 1/25/2022 1:31:31 AM>Date Processed :

<Chromatogram View>

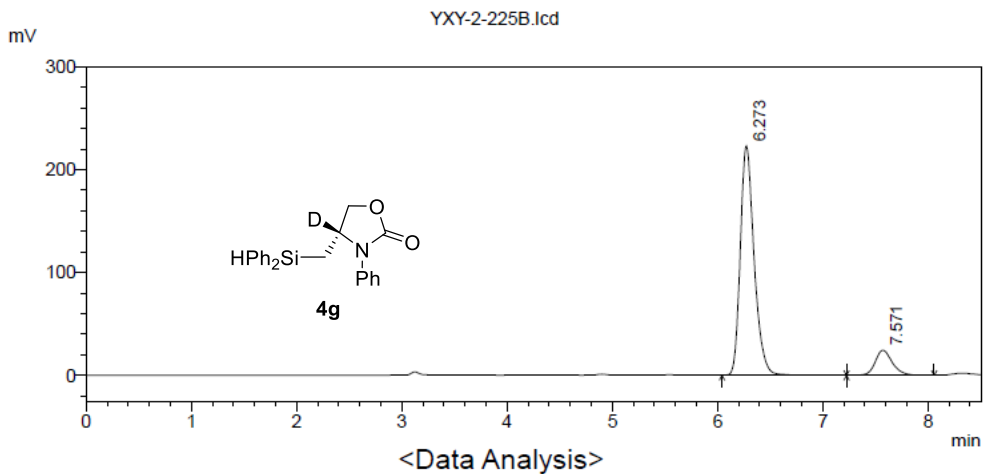

| Detector A 214nm |           |        |         |         |
|------------------|-----------|--------|---------|---------|
| Pesk #           | Ret. Time | Height | Area    | Area%   |
| 1                | 6.273     | 223086 | 2034518 | 88.062  |
| 2                | 7.571     | 24366  | 275815  | 11.938  |
| Total            |           | 247452 | 2310333 | 100.000 |

### Supplementary Figure 171. HPLC spectrum of 4g

<sup>1</sup>H NMR (400 MHz, room temperature, CDCl<sub>3</sub>)

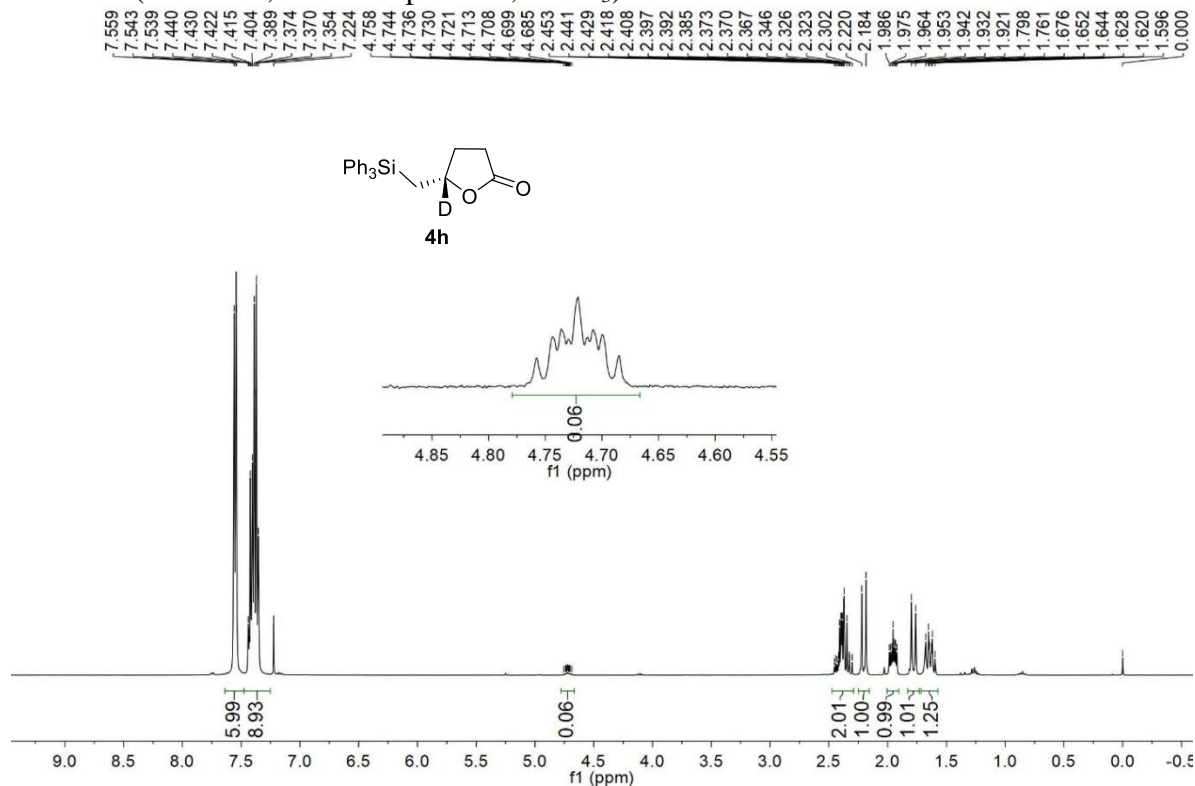

### Supplementary Figure 172. <sup>1</sup>H NMR spectrum of compound 4h

$^{13}\text{C}$  NMR (100 MHz, room temperature,  $\text{CDCl}_3$ )

sql-5-291-2C.1.fid

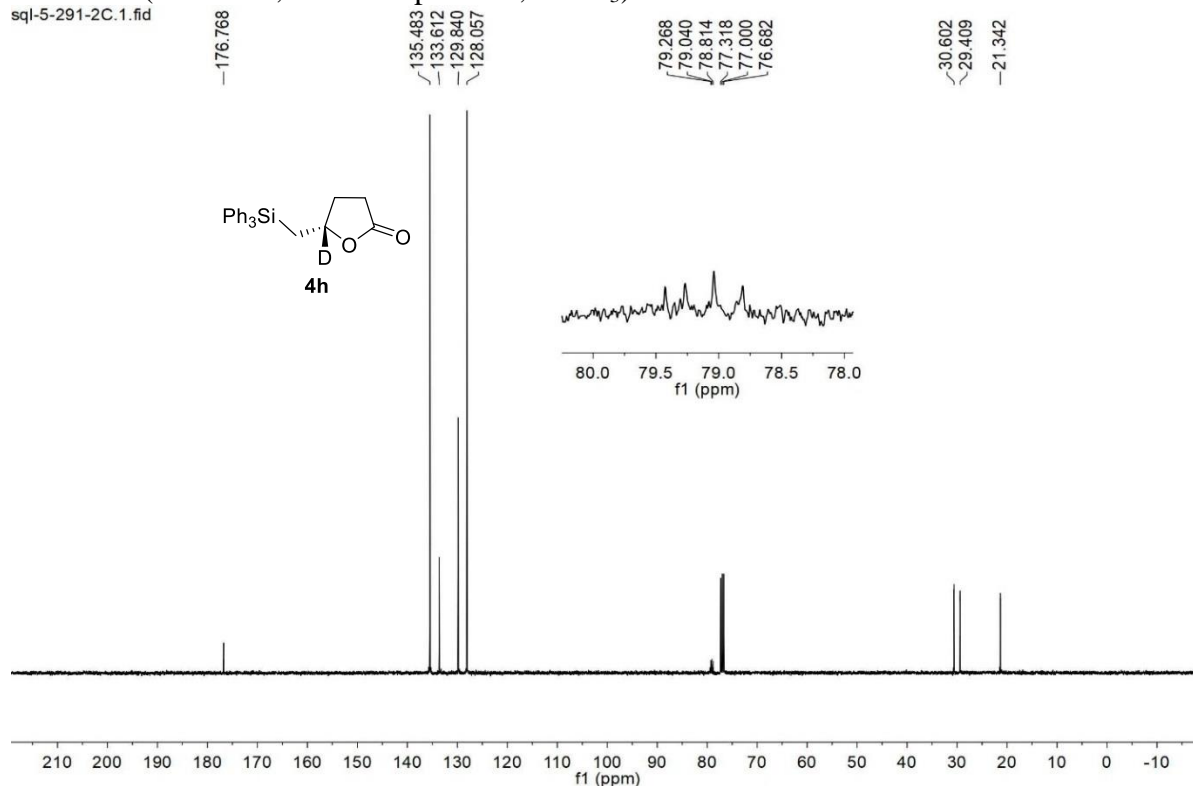

**Supplementary Figure 173.**  $^{13}\text{C}$  NMR spectrum of compound **4h**

HPLC spectrum of racemic **4h**

Data File : SQL-5-291-1-3.lcd  
 Method File : 3AD-H-96-1-214-20min.lcm  
 Date Processed : 9/2/2021 9:07:41 AM

<Chromatogram View>

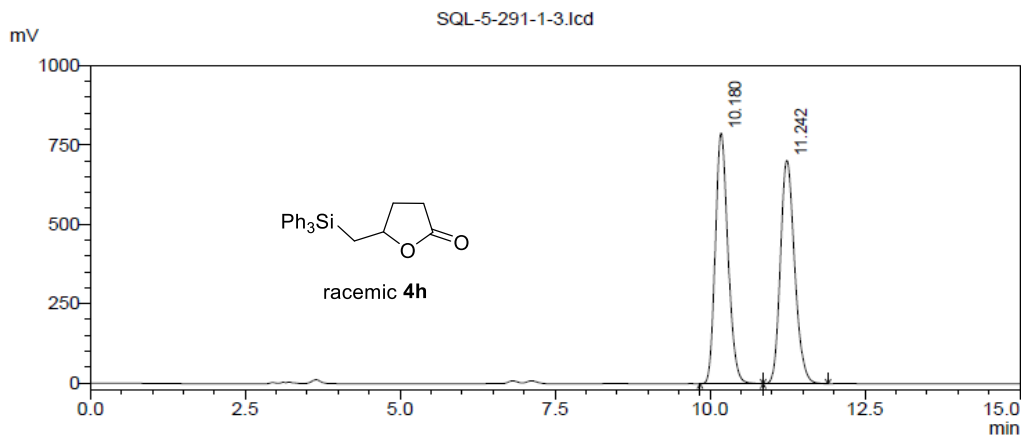

<Data Analysis>

| Detector A 214nm |           |         |          |         |
|------------------|-----------|---------|----------|---------|
| Peak #           | Ret. Time | Height  | Area     | Area%   |
| 1                | 10.180    | 789713  | 11268027 | 49.931  |
| 2                | 11.242    | 703279  | 11299176 | 50.069  |
| Total            |           | 1492992 | 22567203 | 100.000 |

**Supplementary Figure 174.** HPLC spectrum of racemic **4h**

## HPLC spectrum of **4h**

Data File : SQL-5-375-6.lcd  
 Method File : 3AD-H-96-1-214-20min.lcm  
 Date Processed : 9/2/2021 9:07:29 AM

<Chromatogram View>

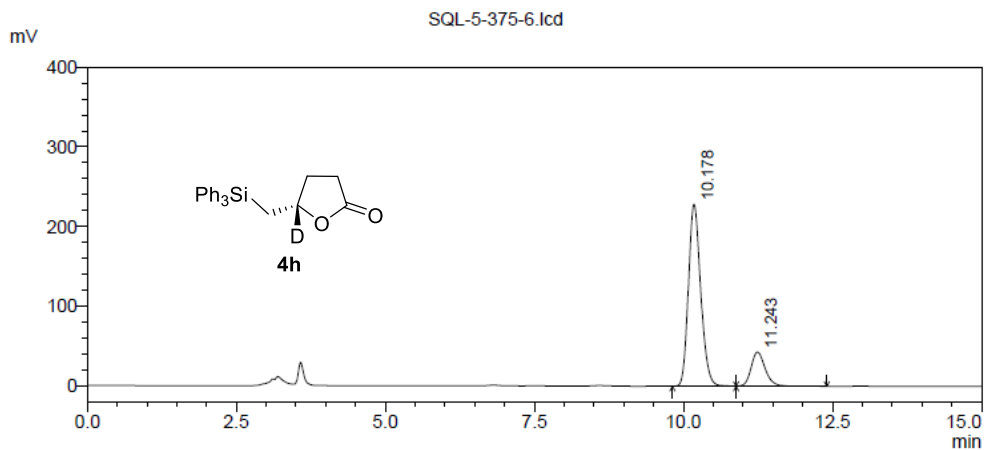

<Data Analysis>

Detector A 214nm

| Peak # | Ret. Time | Height | Area    | Area%   |
|--------|-----------|--------|---------|---------|
| 1      | 10.178    | 228721 | 3268228 | 82.351  |
| 2      | 11.243    | 42756  | 704692  | 17.649  |
| Total  |           | 271477 | 3992921 | 100.000 |

## Supplementary Figure 175. HPLC spectrum of **4h**

<sup>1</sup>H NMR (400 MHz, room temperature, CDCl<sub>3</sub>)

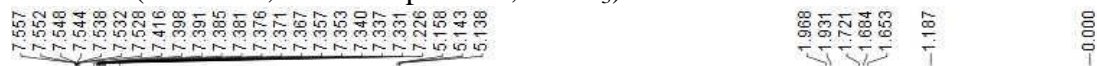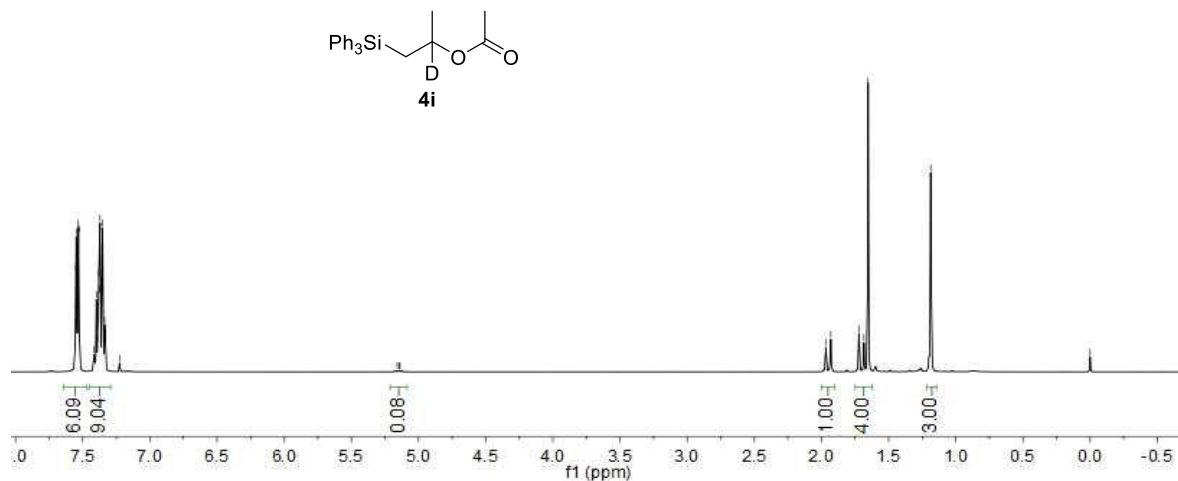

## Supplementary Figure 176. <sup>1</sup>H NMR spectrum of compound **4i**

$^{13}\text{C}$  NMR (100 MHz, room temperature,  $\text{CDCl}_3$ )

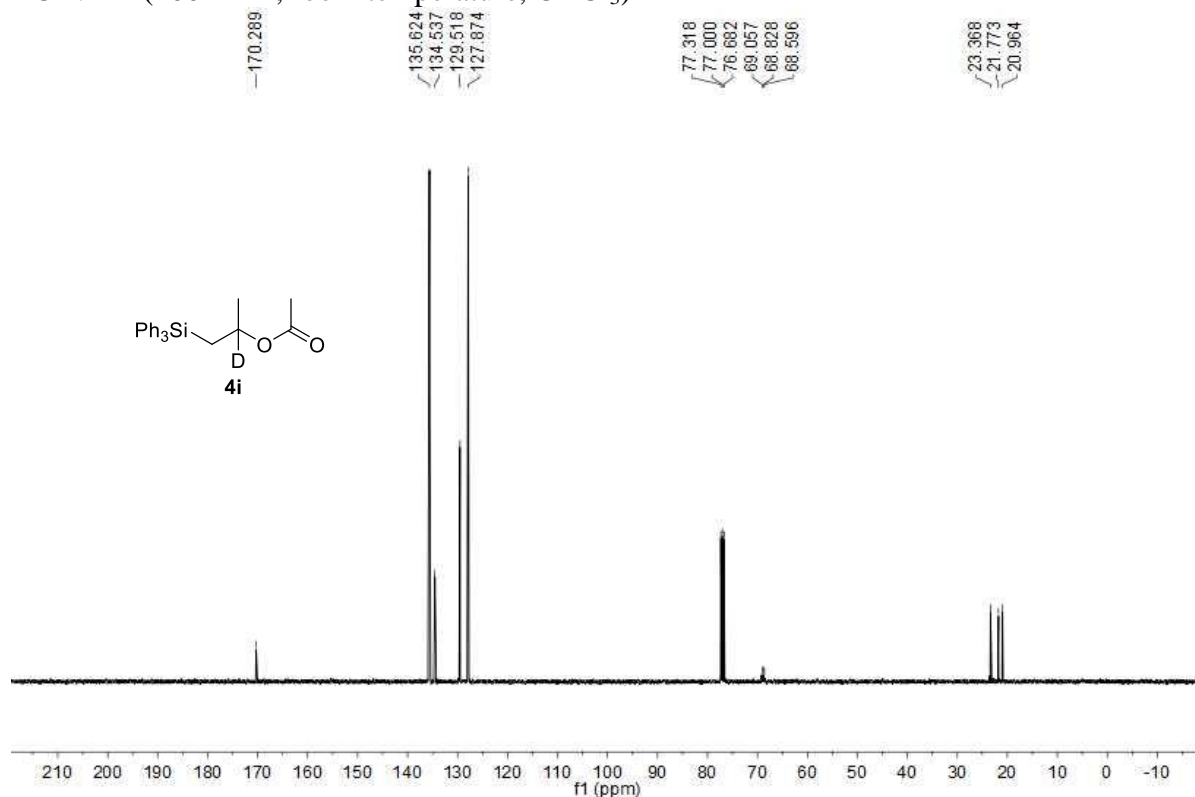

**Supplementary Figure 177.**  $^{13}\text{C}$  NMR spectrum of compound **4i**

HPLC spectrum of racemic **4i**

Tray# : 1  
 Vial# : 19  
 Data File : sql-5-284-1-1.lcd  
 Method File : 1OJ-H-99-1-214.lcm  
 Date Acquired : 2/24/2022 9:03:24 AM  
 Date Processed : 2/24/2022 9:41:20 AM

<Chromatogram View>

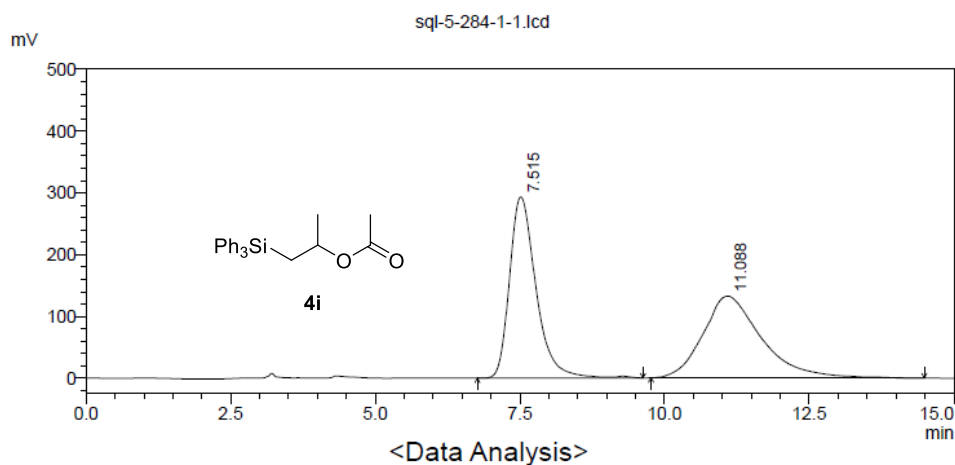

<Data Analysis>

| Detector A 214nm |           |        |          |         |
|------------------|-----------|--------|----------|---------|
| Pesk #           | Ret. Time | Height | Area     | Area%   |
| 1                | 7.515     | 293022 | 9329667  | 50.117  |
| 2                | 11.088    | 132355 | 9285944  | 49.883  |
| Total            |           | 425377 | 18615611 | 100.000 |

**Supplementary Figure 178.** HPLC spectrum of racemic **4i**

### HPLC spectrum of **4i**

Sample Name :  
 Tray# : 1  
 Vial# : 20  
 Data File : sql-5-284-2.lcd  
 Method File : 10J-H-99-1-214.lcm  
 Date Acquired : 2/24/2022 9:20:09 AM  
 Date Processed : 2/24/2022 9:41:57 AM

<Chromatogram View>

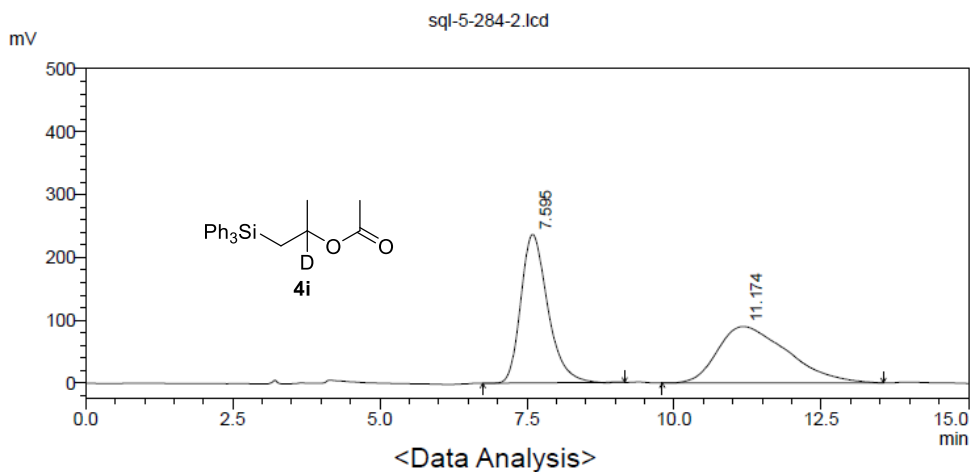

| Peak # | Ret. Time | Height | Area     | Area%   |
|--------|-----------|--------|----------|---------|
| 1      | 7.595     | 236398 | 7534238  | 50.343  |
| 2      | 11.174    | 89784  | 7431712  | 49.657  |
| Total  |           | 326182 | 14965950 | 100.000 |

### Supplementary Figure 179. HPLC spectrum of **4i**

$^1\text{H}$  NMR (400 MHz, room temperature,  $\text{CDCl}_3$ )

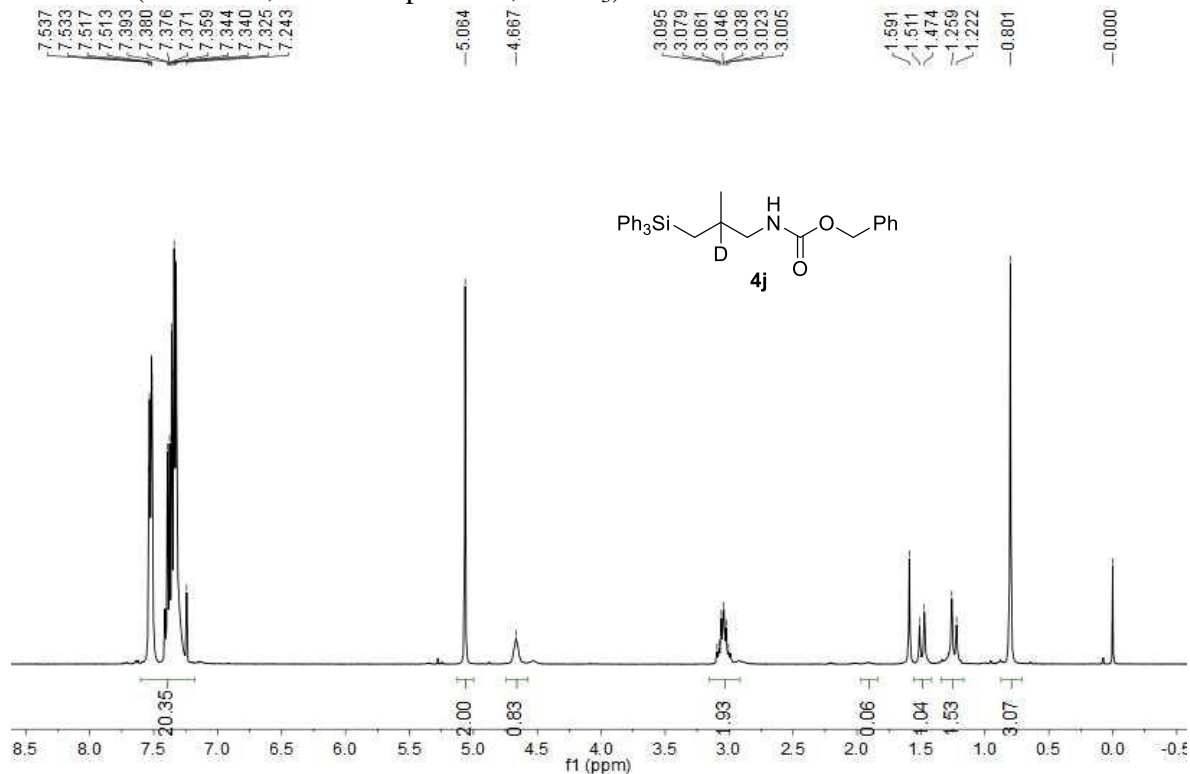

### Supplementary Figure 180. $^1\text{H}$ NMR spectrum of compound **4j**



$^{13}\text{C}$  NMR (100 MHz, room temperature,  $\text{CDCl}_3$ )

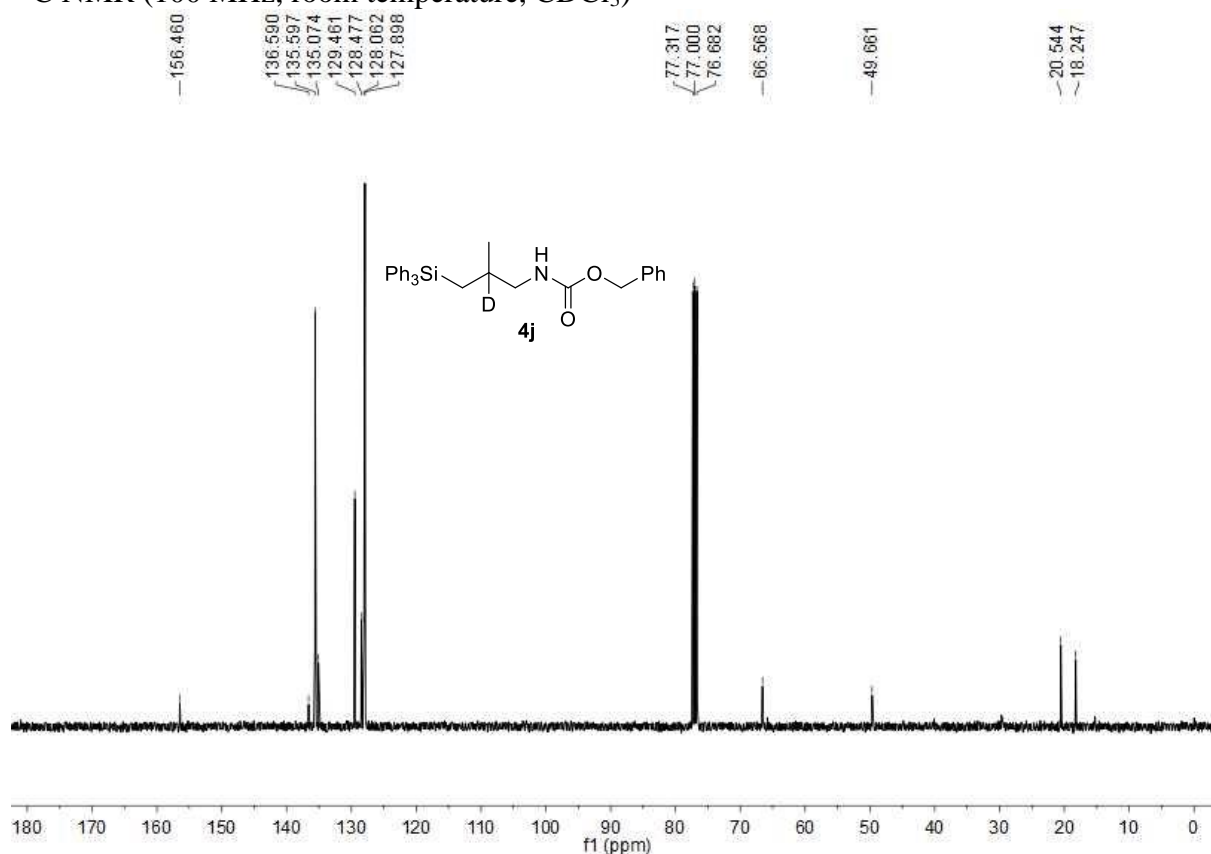

**Supplementary Figure 181.**  $^{13}\text{C}$  NMR spectrum of compound **4j**

HPLC spectrum of racemic **4j**

Tray# : 1  
 Vial# : 19  
 Data File : sql-6-217-1-1-3.lcd  
 Method File : 3AD-H-96-1-214.lcm  
 Date Acquired : 11/19/2021 5:07:52 PM  
 Date Processed : 2/26/2022 12:31:48 AM

<Chromatogram View>

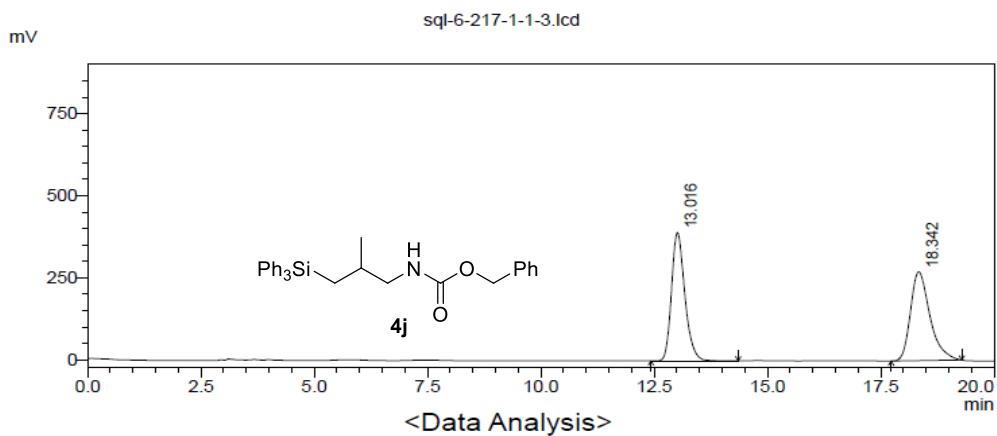

<Data Analysis>

| Detector A 214nm |           |        |          |         |
|------------------|-----------|--------|----------|---------|
| Peak #           | Ret. Time | Height | Area     | Area%   |
| 1                | 13.016    | 391460 | 8033887  | 49.814  |
| 2                | 18.342    | 270979 | 8093922  | 50.186  |
| Total            |           | 662438 | 16127810 | 100.000 |

**Supplementary Figure 182.** HPLC spectrum of racemic **4j**

# HPLC spectrum of 4j

Sample Name :  
Tray# : 1  
Vial# : 19  
Data File : sql-6-217-2-1.lcd  
Method File : 3AD-H-96-1-214.lcm  
Date Acquired : 11/13/2021 3:10:08 PM  
Date Processed : 11/13/2021 6:03:43 PM

<Chromatogram View>

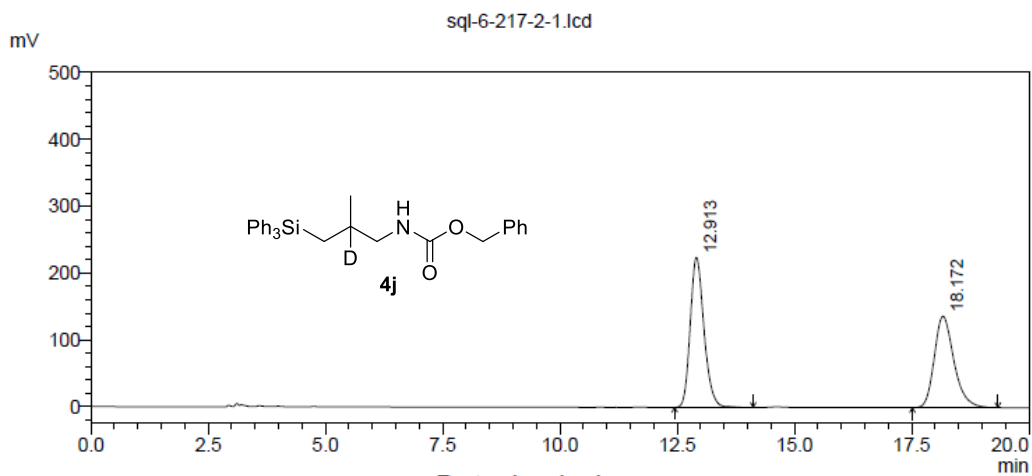

<Data Analysis>

Detector A 214nm

| Pesk # | Ret. Time | Height | Area    | Area%   |
|--------|-----------|--------|---------|---------|
| 1      | 12.913    | 224455 | 4578526 | 53.444  |
| 2      | 18.172    | 136651 | 3988398 | 46.556  |
| Total  |           | 361106 | 8566924 | 100.000 |

Supplementary Figure 183. HPLC spectrum of 4j

$^1\text{H}$  NMR (400 MHz, room temperature,  $\text{CDCl}_3$ )

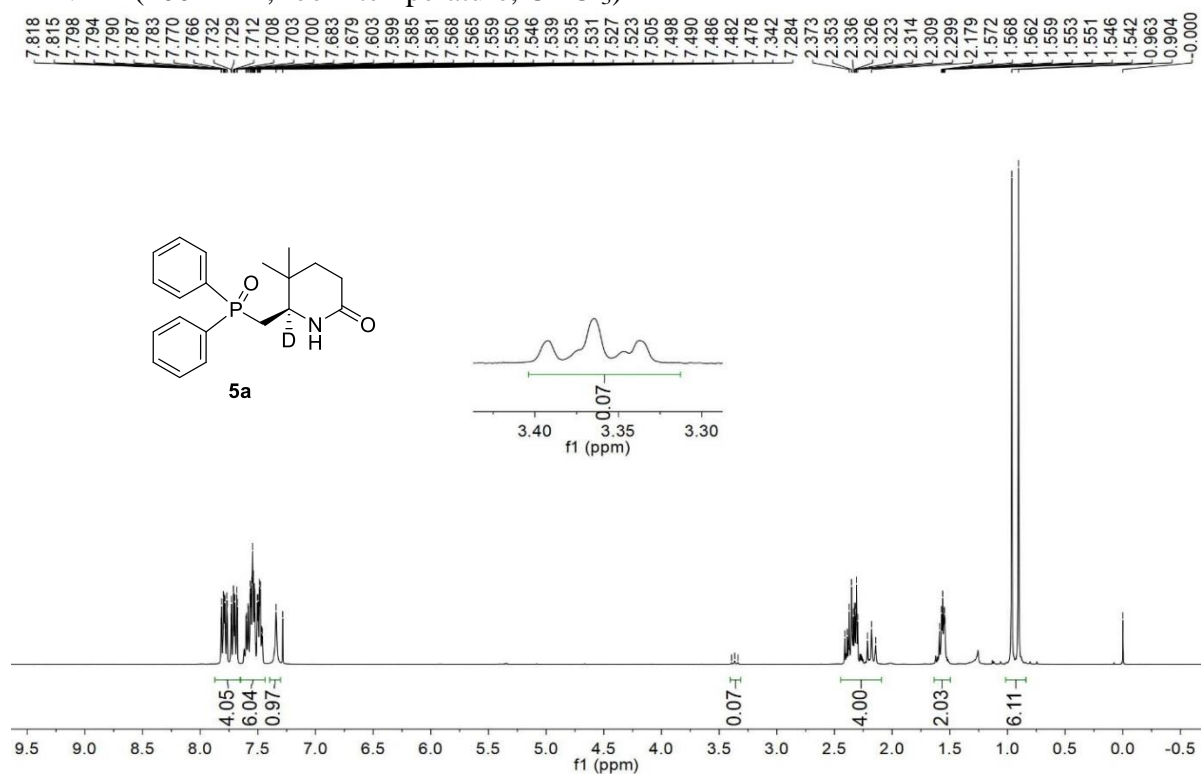

Supplementary Figure 184.  $^1\text{H}$  NMR spectrum of compound **5a**

$^{13}\text{C}$  NMR (100 MHz, room temperature,  $\text{CDCl}_3$ )

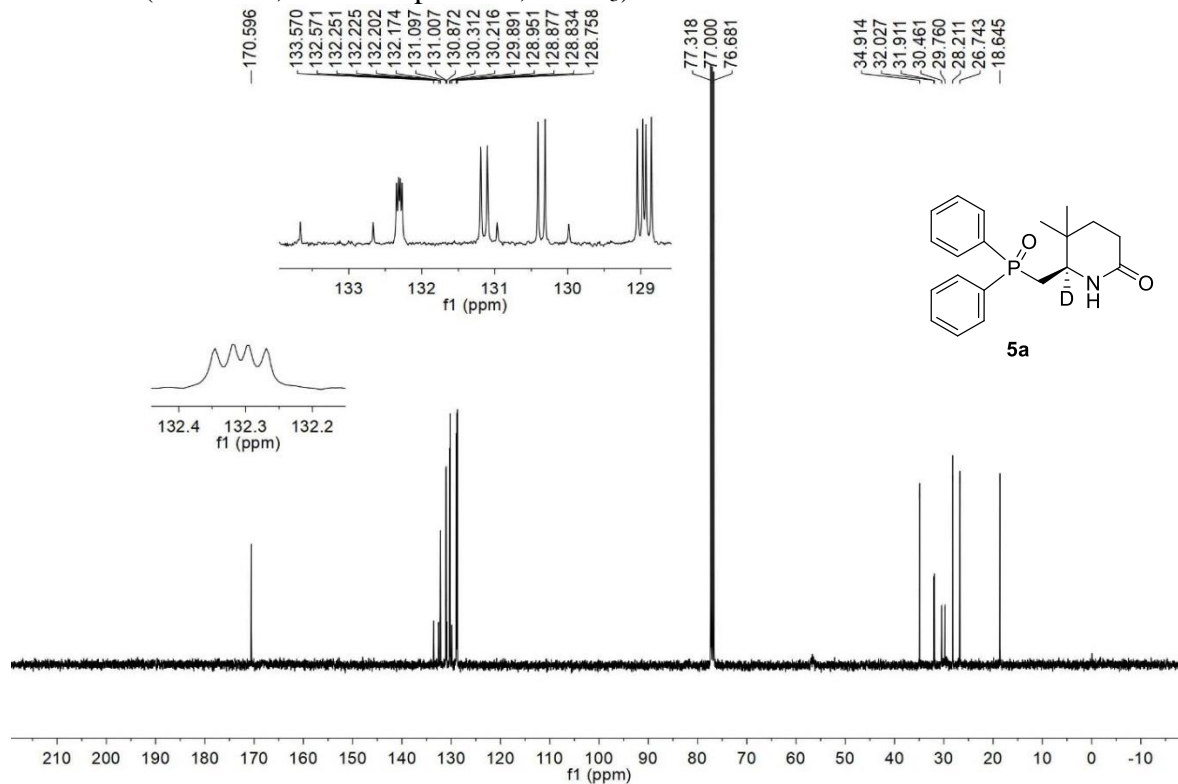

Supplementary Figure 185.  $^{13}\text{C}$  NMR spectrum of compound **5a**

$^{31}\text{P}$  NMR (162 MHz, room temperature,  $\text{CDCl}_3$ )

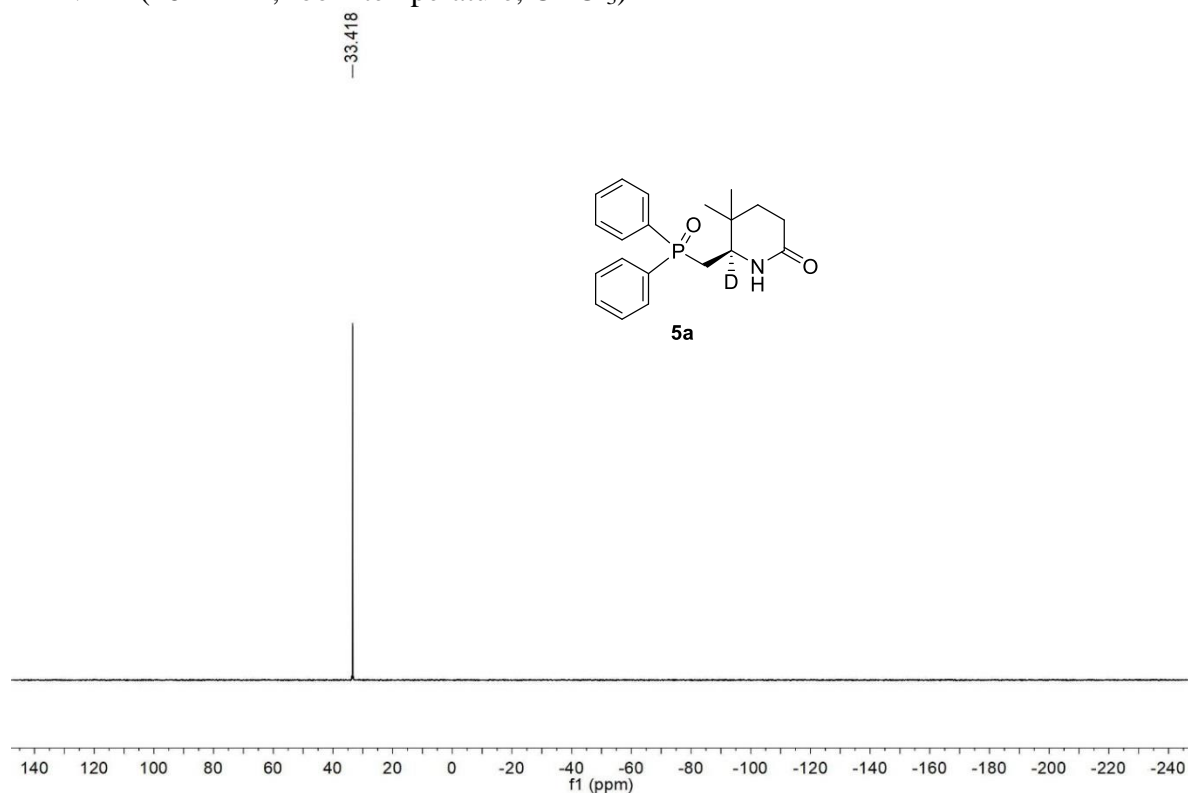

**Supplementary Figure 186.**  $^{31}\text{P}$  NMR spectrum of compound **5a**

HPLC spectrum of racemic **5a**

Data File : (39-racemic)SQL-4-235-1.lcd  
Method File : AD-H-65-0.5-214.lcm  
Date Processed : 7/17/2021 12:34:24 PM

<Chromatogram View>

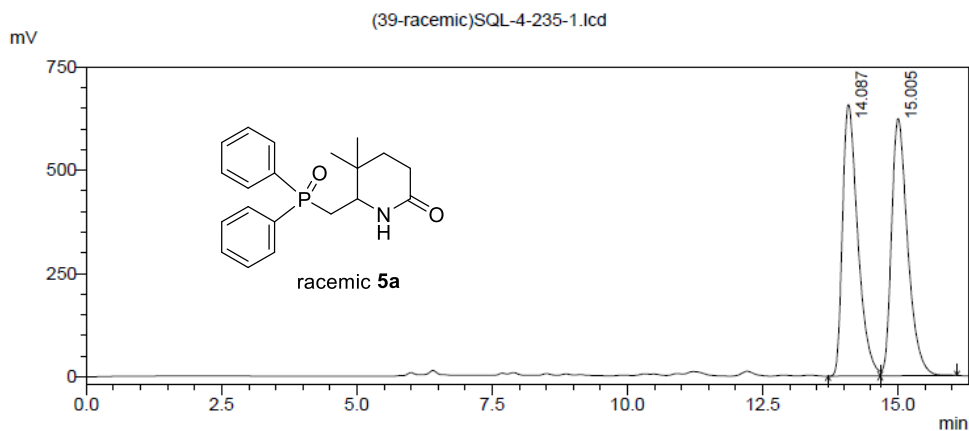

<Data Analysis>

| Pesk # | Ret. Time | Height  | Area     | Area%   |
|--------|-----------|---------|----------|---------|
| 1      | 14.087    | 656825  | 12878308 | 49.830  |
| 2      | 15.005    | 622289  | 12966043 | 50.170  |
| Total  |           | 1279115 | 25844350 | 100.000 |

**Supplementary Figure 187.** HPLC spectrum of racemic **5a**

## HPLC spectrum of 5a

Data File : (39-chiral)SQL-4-258-2-.lcd  
 Method File : 3AD-H-65-0.5-214.lcm  
 Date Processed : 7/17/2021 12:34:07 PM

<Chromatogram View>

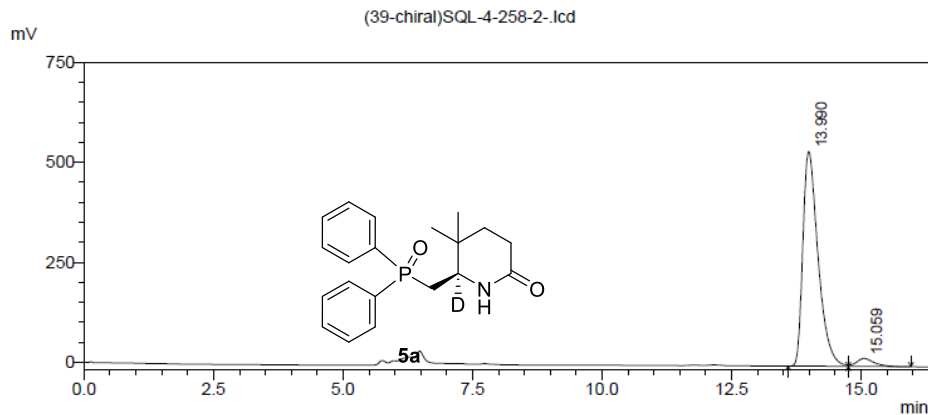

<Data Analysis>

| Peak # | Ret. Time | Height | Area     | Area%   |
|--------|-----------|--------|----------|---------|
| 1      | 13.990    | 536413 | 10961497 | 95.919  |
| 2      | 15.059    | 19860  | 466318   | 4.081   |
| Total  |           | 556273 | 11427816 | 100.000 |

## Supplementary Figure 188. HPLC spectrum of 5a

<sup>1</sup>H NMR (400 MHz, room temperature, CDCl<sub>3</sub>)

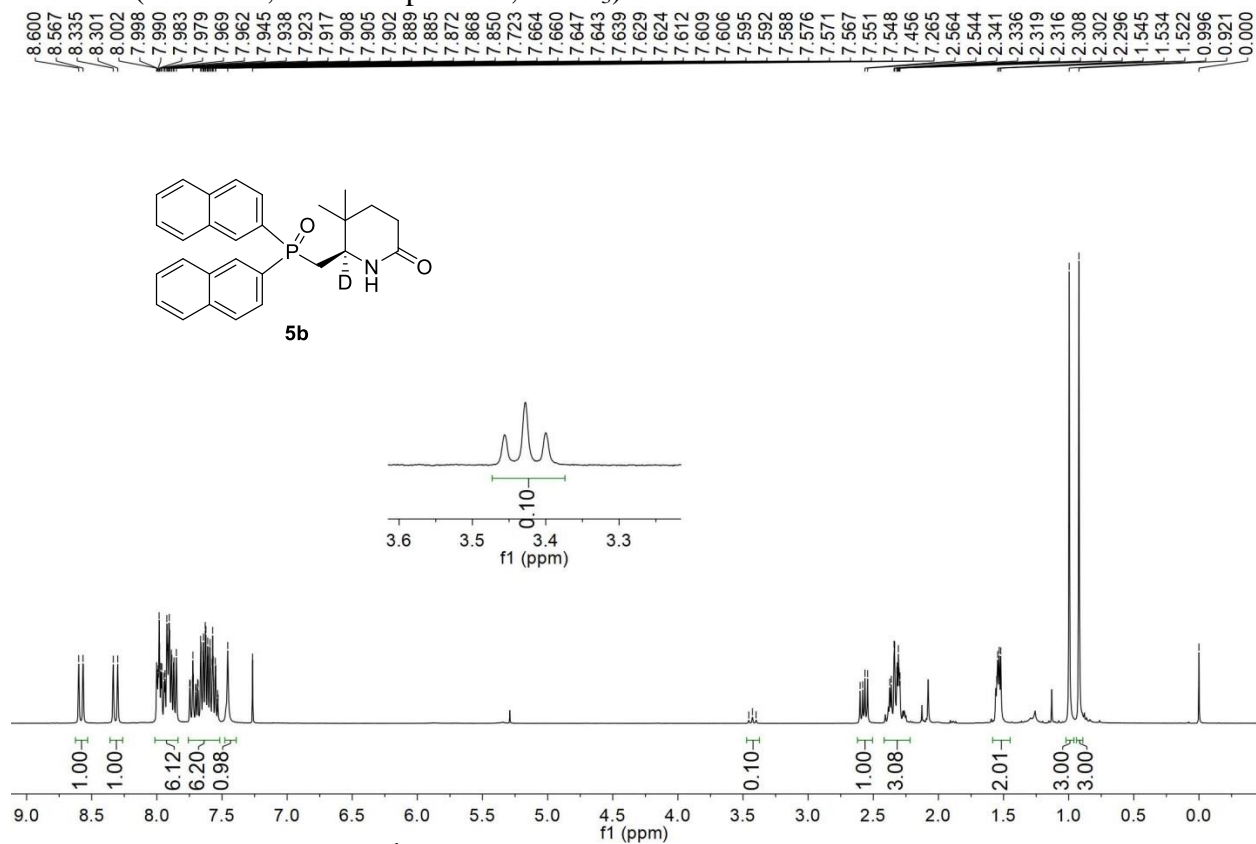

## Supplementary Figure 189. <sup>1</sup>H NMR spectrum of compound 5b

$^{13}\text{C}$  NMR (100 MHz, room temperature,  $\text{CDCl}_3$ )

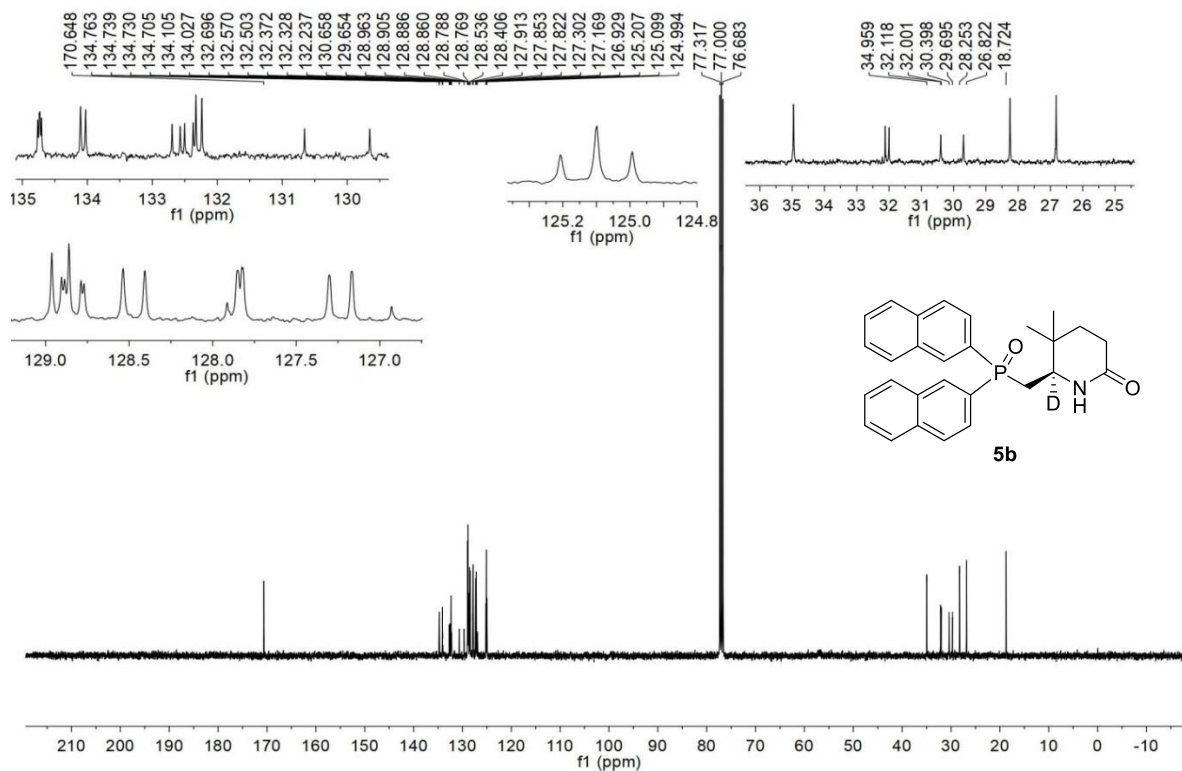

Supplementary Figure 190.  $^{13}\text{C}$  NMR spectrum of compound **5b**

$^{31}\text{P}$  NMR (162 MHz, room temperature,  $\text{CDCl}_3$ )

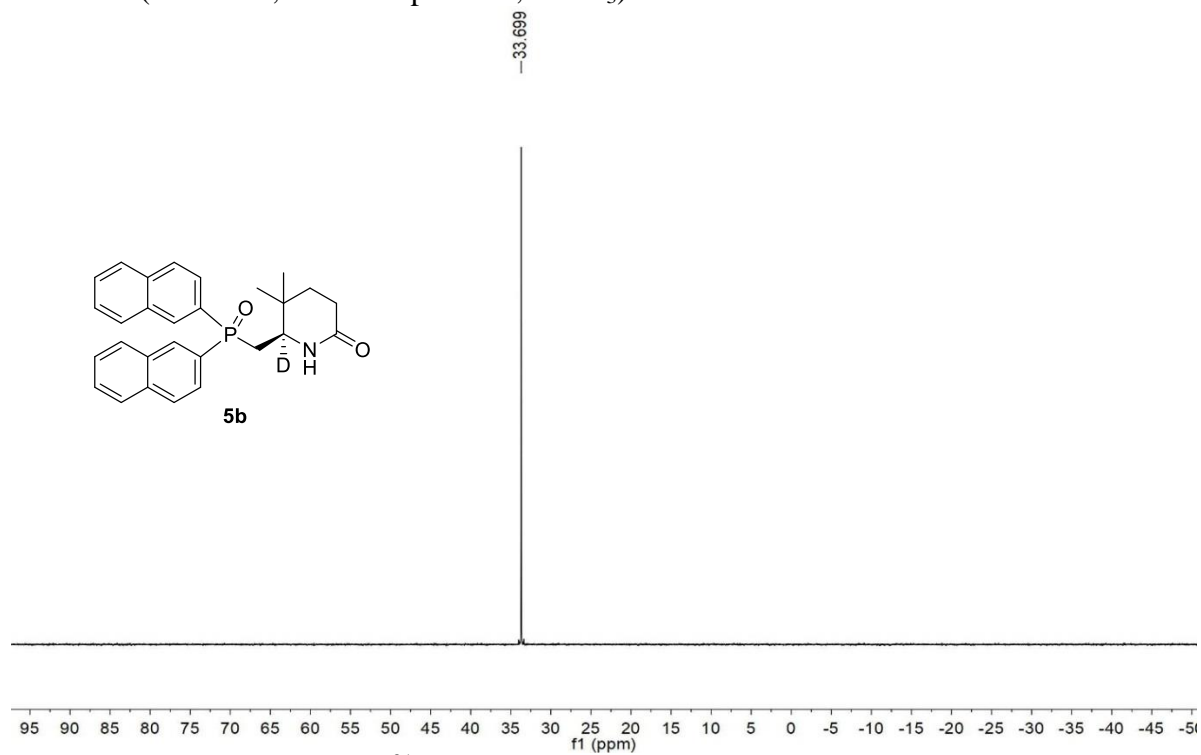

Supplementary Figure 191.  $^{31}\text{P}$  NMR spectrum of compound **5b**

## HPLC spectrum of racemic **5b**

Data File : (40-racemic)SQL-4-323-1.lcd  
Method File : 4OD-H-80-1-214.lcm  
Date Processed : 7/17/2021 12:35:12 PM

<Chromatogram View>

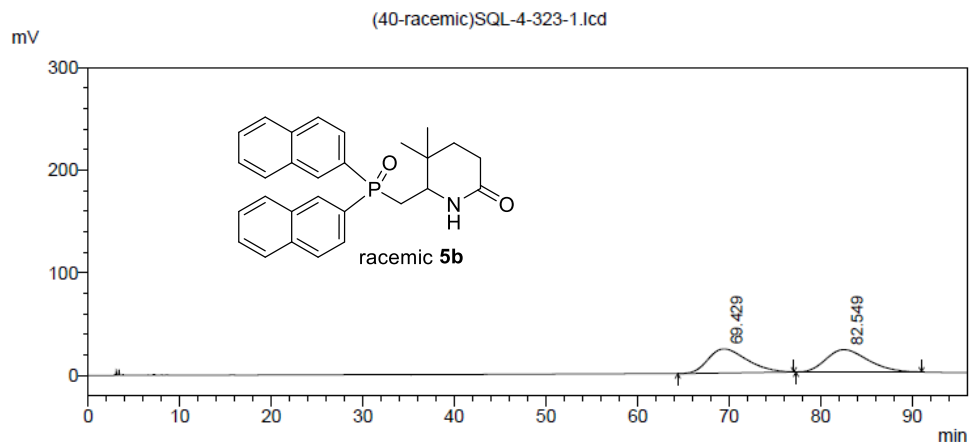

<Data Analysis>

| DetA 214nm |           |        |          |         |
|------------|-----------|--------|----------|---------|
| Peak #     | Ret. Time | Height | Area     | Area%   |
| 1          | 69.429    | 23424  | 6877168  | 49.802  |
| 2          | 82.549    | 21776  | 6931807  | 50.198  |
| Total      |           | 45200  | 13808974 | 100.000 |

## Supplementary Figure 192. HPLC spectrum of racemic **5b**

### HPLC spectrum of **5b**

Data File : (40-chiral)SQL-4-327.lcd  
Method File : 4OD-H-80-1-214.lcm  
Date Processed : 7/17/2021 12:34:55 PM

<Chromatogram View>

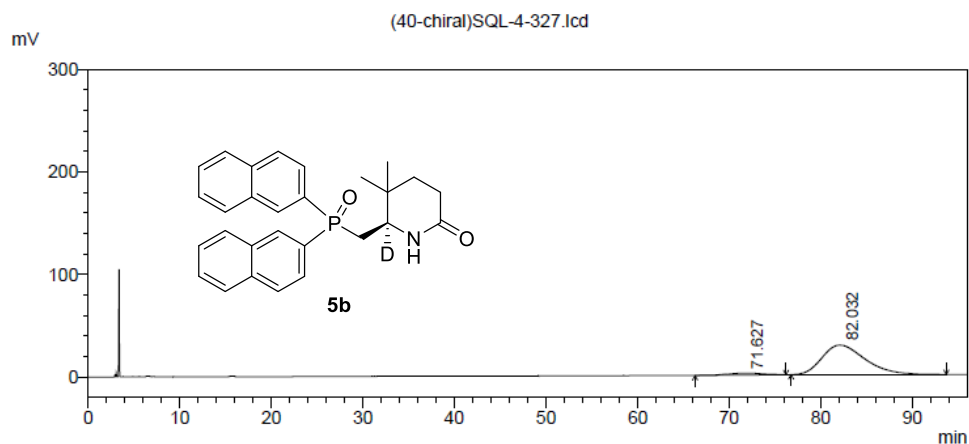

<Data Analysis>

| DetA 214nm |           |        |         |         |
|------------|-----------|--------|---------|---------|
| Peak #     | Ret. Time | Height | Area    | Area%   |
| 1          | 71.627    | 1711   | 467050  | 4.732   |
| 2          | 82.032    | 28748  | 9402629 | 95.268  |
| Total      |           | 30459  | 9869679 | 100.000 |

## Supplementary Figure 193. HPLC spectrum of **5b**

$^1\text{H}$  NMR (400 MHz, room temperature,  $\text{CDCl}_3$ )

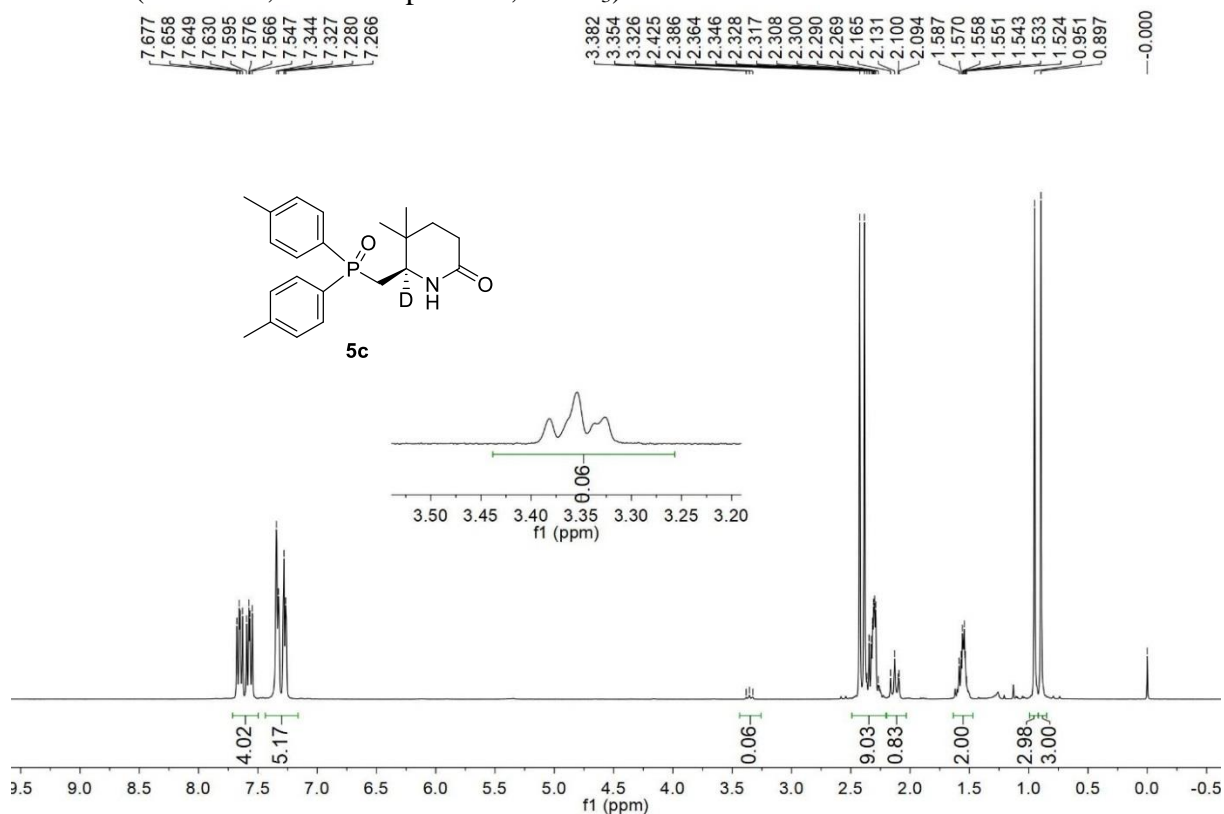

Supplementary Figure 194.  $^1\text{H}$  NMR spectrum of compound **5c**

$^{13}\text{C}$  NMR (100 MHz, room temperature,  $\text{CDCl}_3$ )

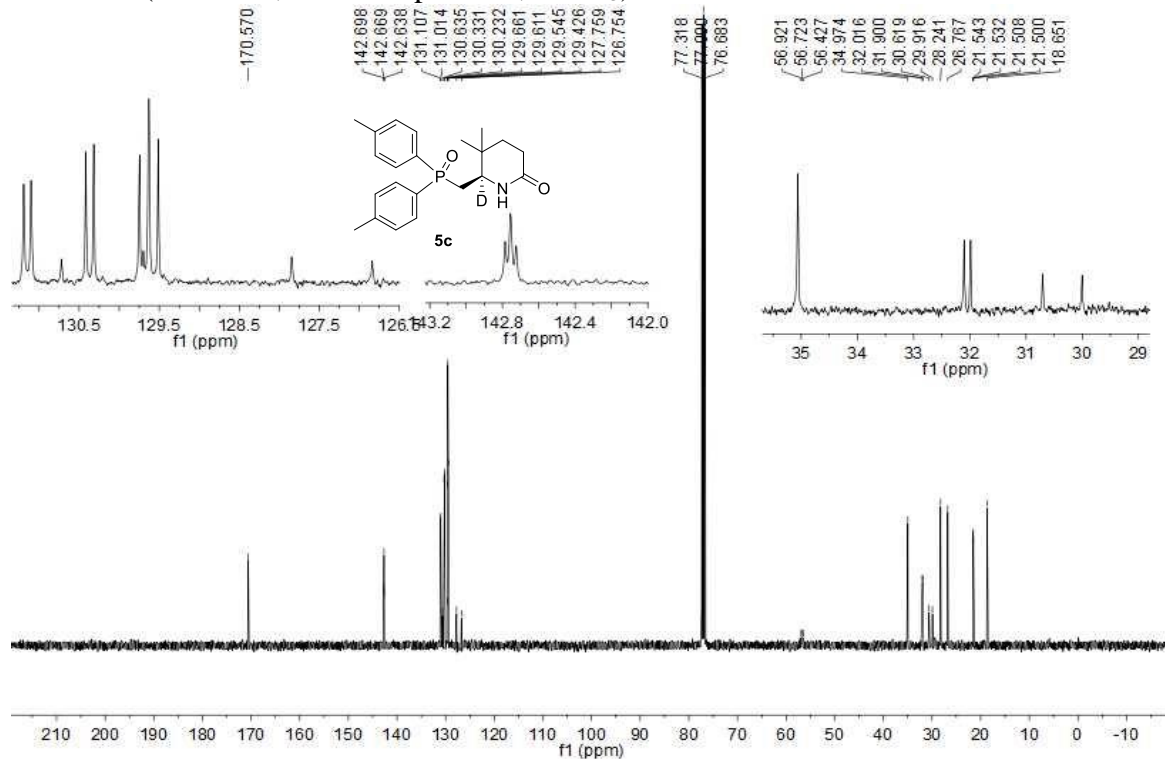

Supplementary Figure 195.  $^{13}\text{C}$  NMR spectrum of compound **5c**



$^{31}\text{P}$  NMR (162 MHz, room temperature,  $\text{CDCl}_3$ )

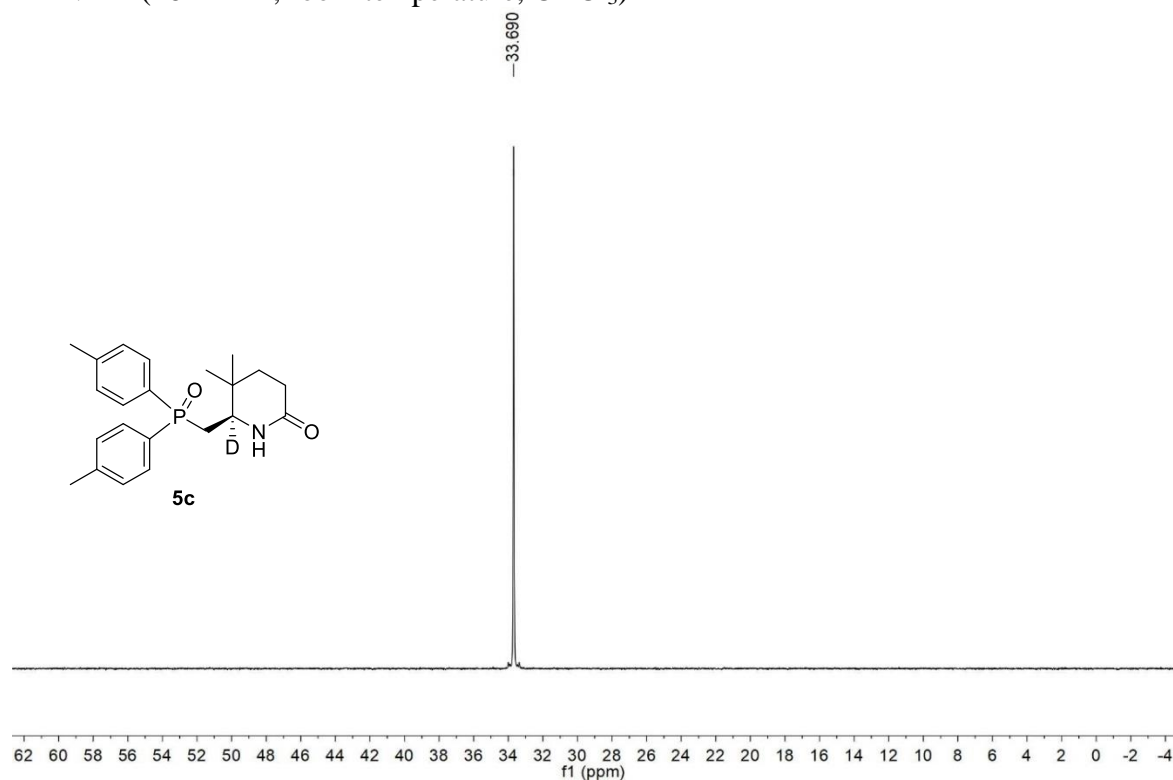

**Supplementary Figure 196.**  $^{31}\text{P}$  NMR spectrum of compound **5c**

HPLC spectrum of racemic **5c**

Data File : (41-racemic)SQL-4-243-1.lcd  
Method File : AD-H-60-0.5-214.lcm  
Date Processed : 7/17/2021 12:35:49 PM

<Chromatogram View>

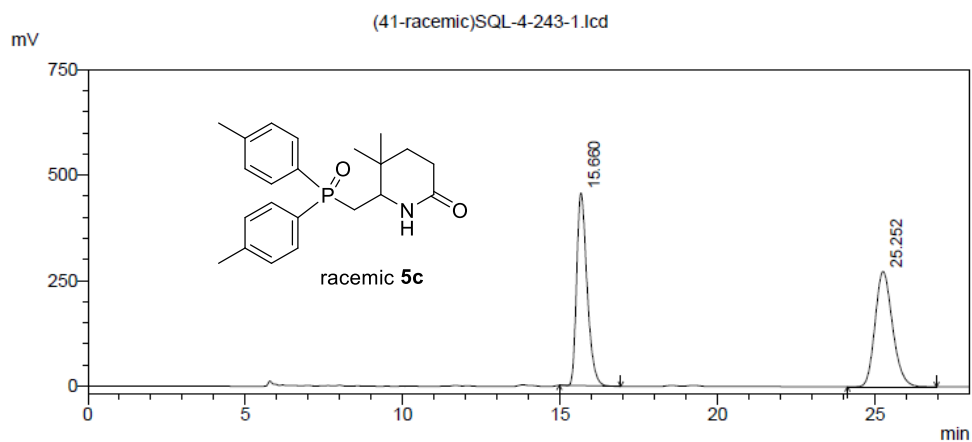

<Data Analysis>

| Pesck # | Ret. Time | Height | Area     | Area%   |
|---------|-----------|--------|----------|---------|
| 1       | 15.660    | 455855 | 10509646 | 49.931  |
| 2       | 25.252    | 273003 | 10538783 | 50.069  |
| Total   |           | 728857 | 21048429 | 100.000 |

**Supplementary Figure 197.** HPLC spectrum of racemic **5c**

# HPLC spectrum of 5c

Data File : (41-chiral)SQL-4-300.lcd  
 Method File : 3AD-H-60-0.5-214.lcm  
 Date Processed : 7/17/2021 12:35:35 PM

<Chromatogram View>

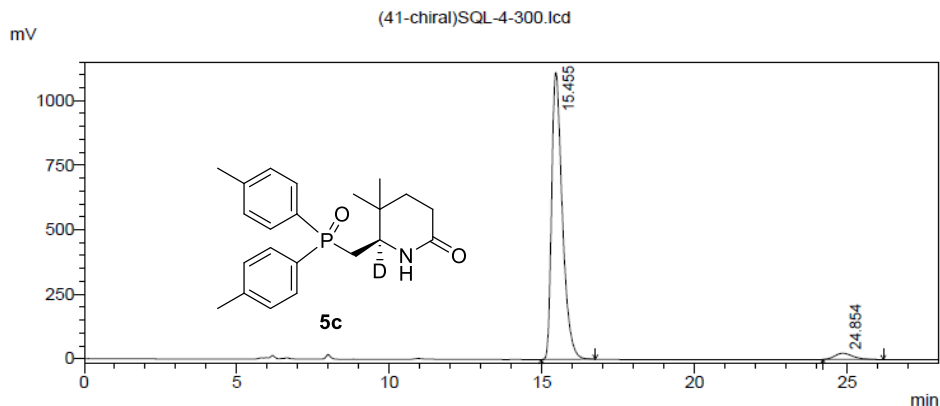

<Data Analysis>

| DetA 214nm |           |         |          |         |
|------------|-----------|---------|----------|---------|
| Peak #     | Ret. Time | Height  | Area     | Area%   |
| 1          | 15.455    | 1112509 | 27098253 | 96.517  |
| 2          | 24.854    | 23974   | 977936   | 3.483   |
| Total      |           | 1136483 | 28076190 | 100.000 |

## Supplementary Figure 198. HPLC spectrum of 5c

<sup>1</sup>H NMR (400 MHz, room temperature, CDCl<sub>3</sub>)

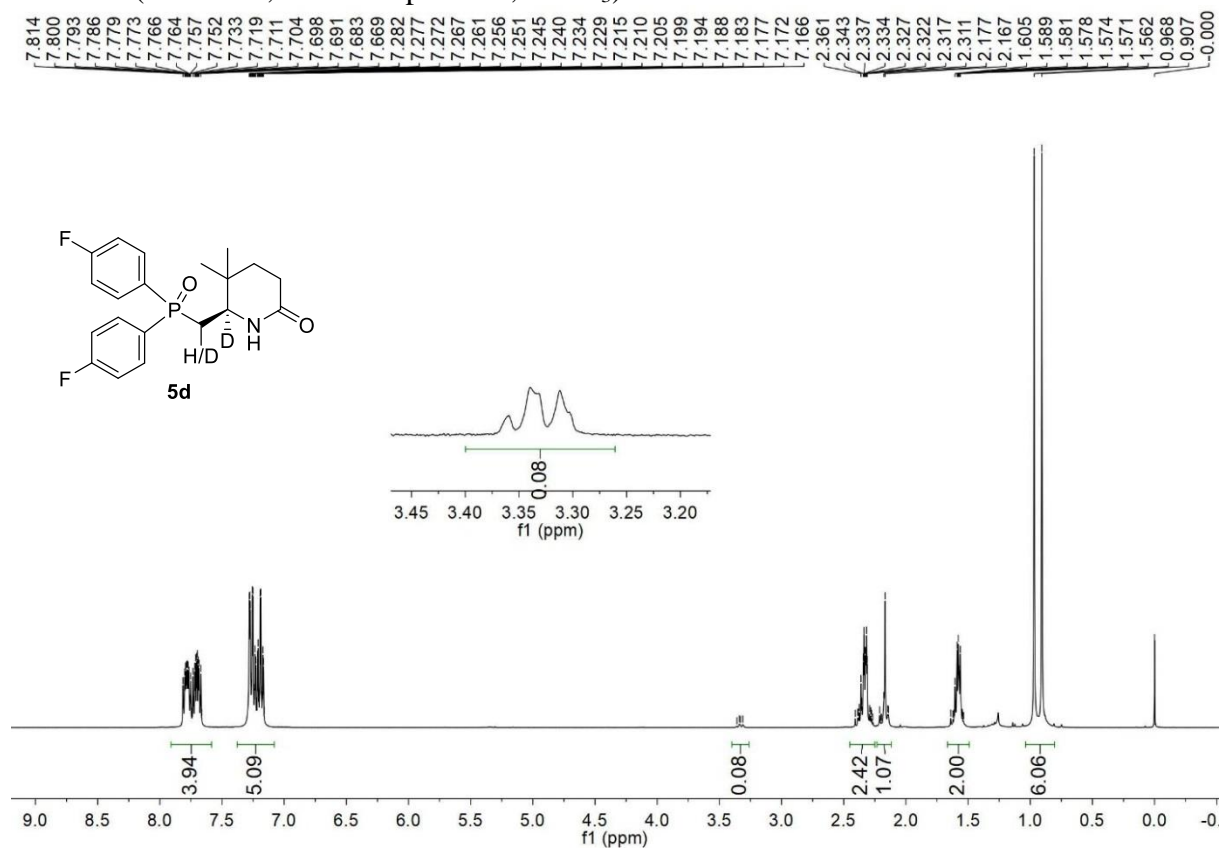

## Supplementary Figure 199. <sup>1</sup>H NMR spectrum of compound 5d

$^{13}\text{C}$  NMR (100 MHz, room temperature,  $\text{CDCl}_3$ )

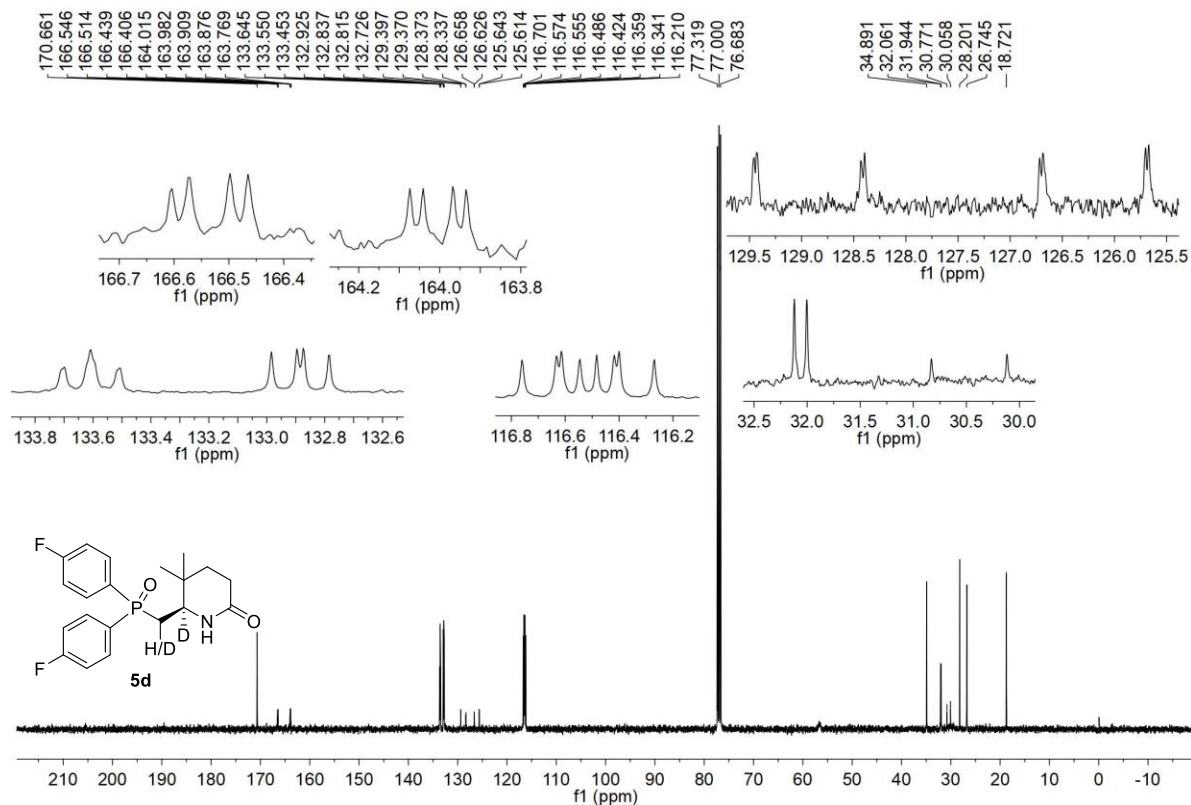

**Supplementary Figure 200.**  $^{13}\text{C}$  NMR spectrum of compound **5d**

$^{31}\text{P}$  NMR (162 MHz, room temperature,  $\text{CDCl}_3$ )

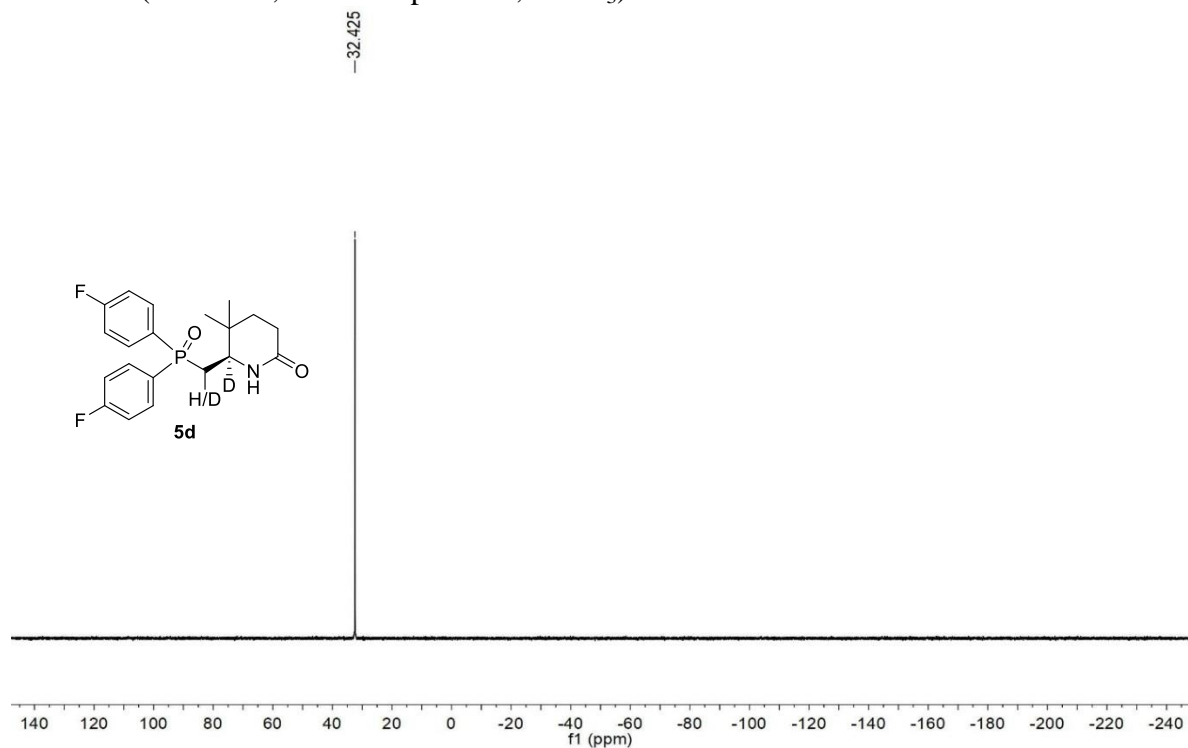

**Supplementary Figure 201.**  $^{31}\text{P}$  NMR spectrum of compound **5d**

$^{19}\text{F}$  NMR (376 MHz, room temperature,  $\text{CDCl}_3$ )

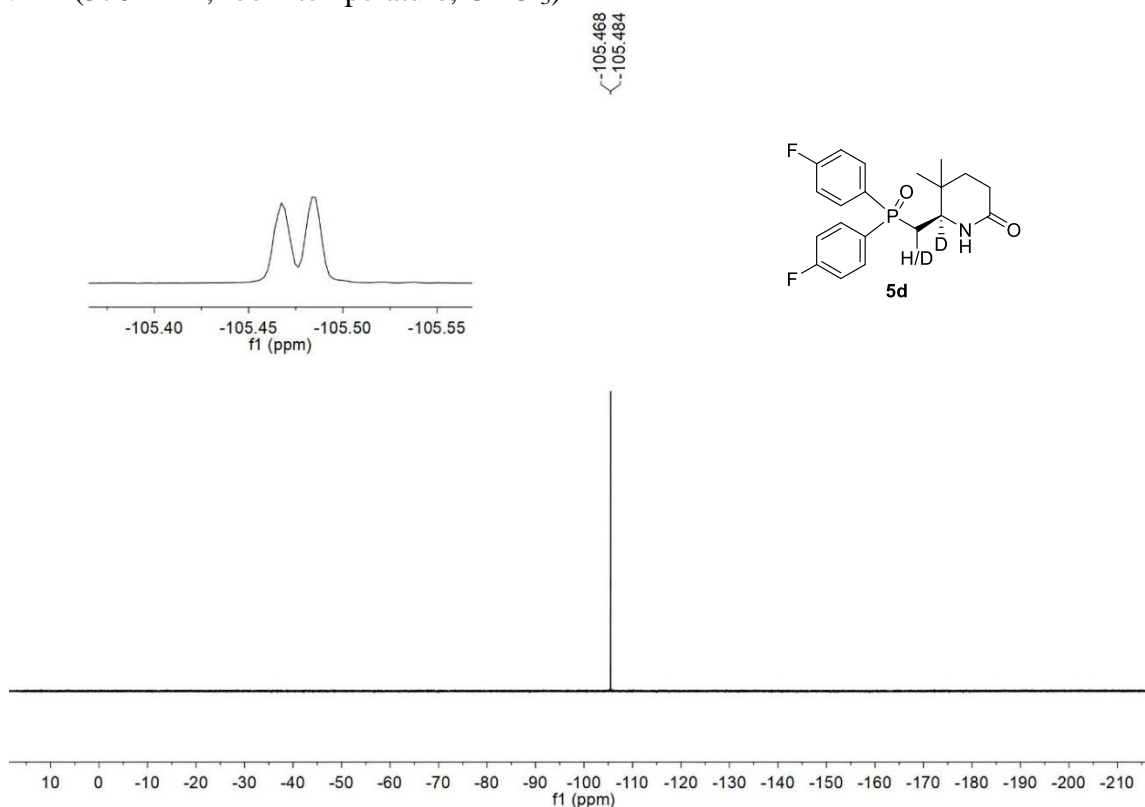

**Supplementary Figure 202.**  $^{19}\text{F}$  NMR spectrum of compound **5d**

HPLC spectrum of racemic **5d**

Data File : (42-racemic)SQL-4-256-1.lcd  
Method File : 2AS-H-80-0.5-214.lcm  
Date Processed : 7/17/2021 12:36:05 PM

<Chromatogram View>

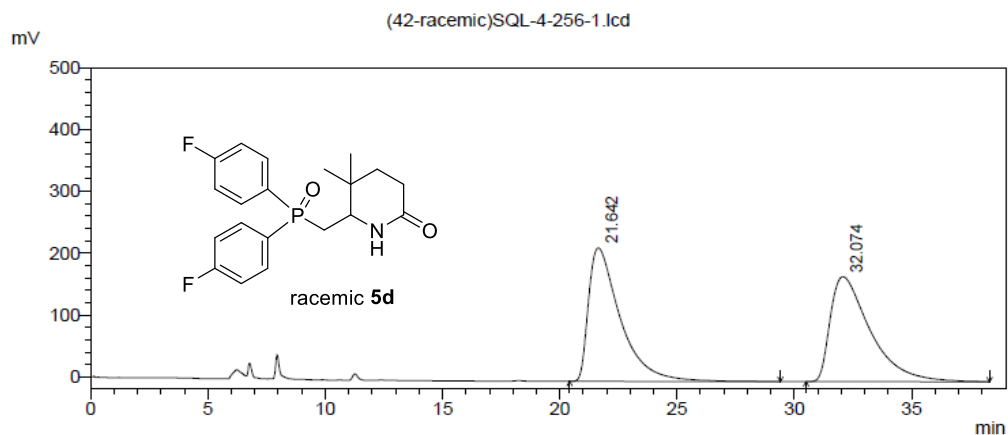

<Data Analysis>

| Pesck # | Ret. Time | Height | Area     | Area%   |
|---------|-----------|--------|----------|---------|
| 1       | 21.642    | 215870 | 20389489 | 50.278  |
| 2       | 32.074    | 169677 | 20164268 | 49.722  |
| Total   |           | 385546 | 40553757 | 100.000 |

**Supplementary Figure 203.** HPLC spectrum of racemic **5d**

# HPLC spectrum of 5d

Data File : (42-chiral)SQL-4-301.lcd  
 Method File : 2AS-H-80-0.5-214.lcm  
 Date Processed : 7/17/2021 12:36:24 PM

<Chromatogram View>

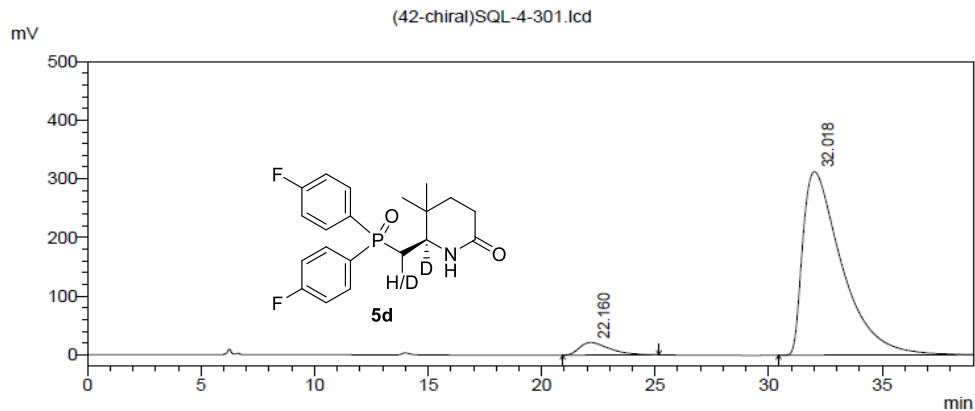

<Data Analysis>

| Peak # | Ret. Time | Height | Area     | Area%   |
|--------|-----------|--------|----------|---------|
| 1      | 22.160    | 21547  | 1977618  | 4.993   |
| 2      | 32.018    | 312869 | 37630419 | 95.007  |
| Total  |           | 334416 | 39608037 | 100.000 |

## Supplementary Figure 204. HPLC spectrum of 5d

<sup>1</sup>H NMR (400 MHz, room temperature, CDCl<sub>3</sub>)

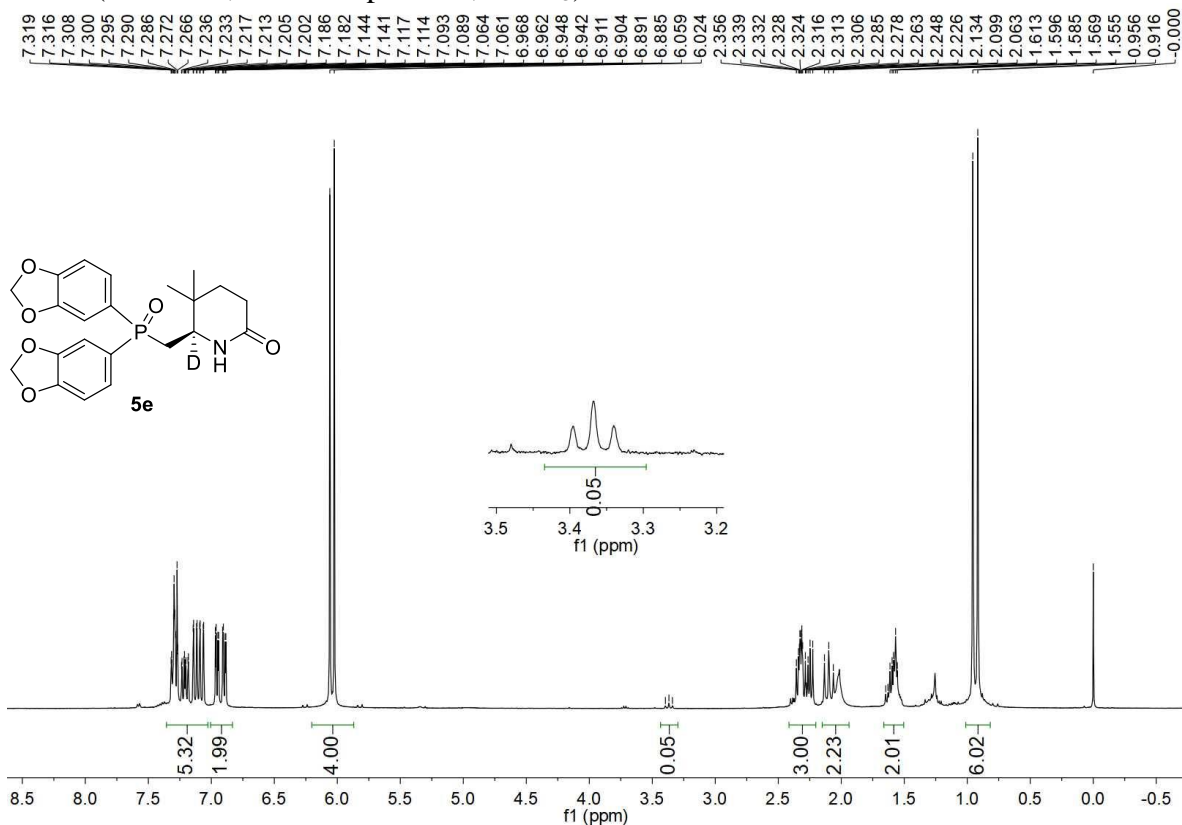

## Supplementary Figure 205. <sup>1</sup>H NMR spectrum of compound 5e

$^{13}\text{C}$  NMR (100 MHz, room temperature,  $\text{CDCl}_3$ )

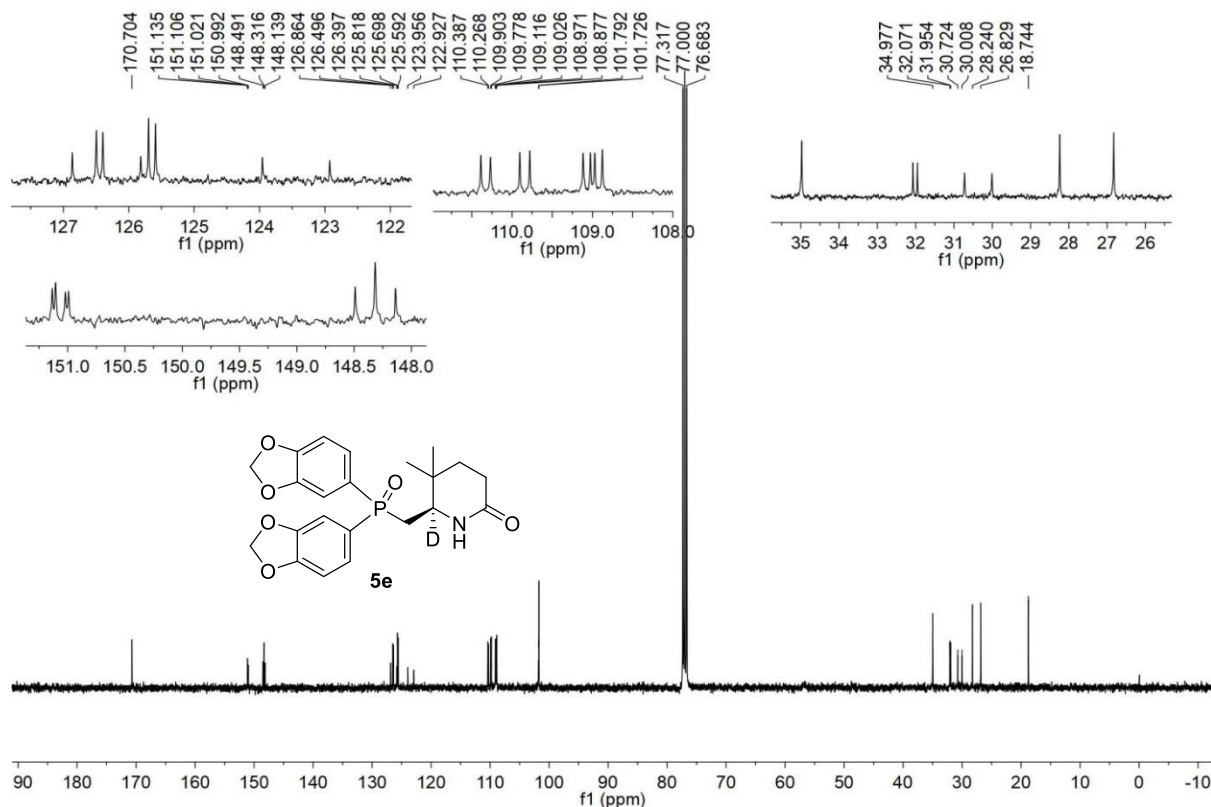

**Supplementary Figure 206.**  $^{13}\text{C}$  NMR spectrum of compound **5e**

$^{31}\text{P}$  NMR (162 MHz, room temperature,  $\text{CDCl}_3$ )

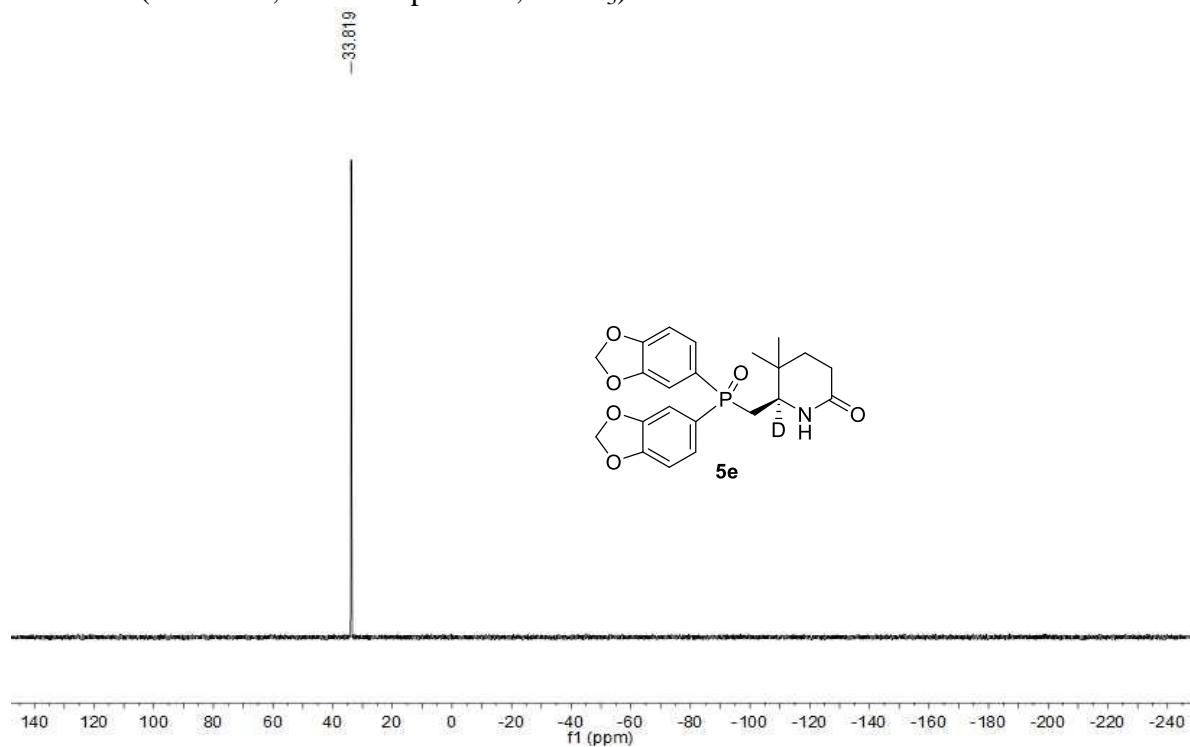

**Supplementary Figure 207.**  $^{31}\text{P}$  NMR spectrum of compound **5e**

## HPLC spectrum of racemic **5e**

Data File : (43-racemic)SQL-4-336-1.lcd  
Method File : 3AD-H-70-1-214.lcm  
Date Processed : 7/17/2021 12:36:52 PM

<Chromatogram View>

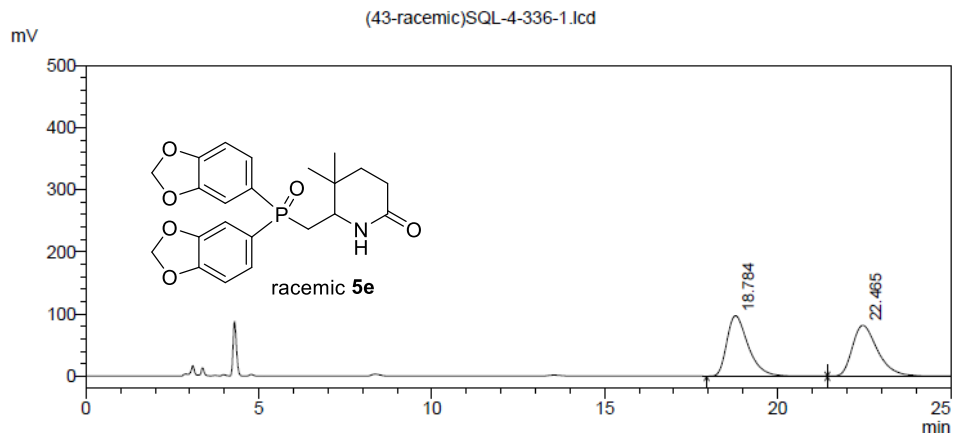

<Data Analysis>

| Pesck # | Ret. Time | Height | Area    | Area%   |
|---------|-----------|--------|---------|---------|
| 1       | 18.784    | 97534  | 4217447 | 49.993  |
| 2       | 22.465    | 82031  | 4218679 | 50.007  |
| Total   |           | 179564 | 8436126 | 100.000 |

## Supplementary Figure 208. HPLC spectrum of racemic **5e**

## HPLC spectrum of **5e**

Data File : (43-chiral)SQL-4-348-1.lcd  
Method File : 3AD-H-70-1-214.lcm  
Date Processed : 7/17/2021 12:36:39 PM

<Chromatogram View>

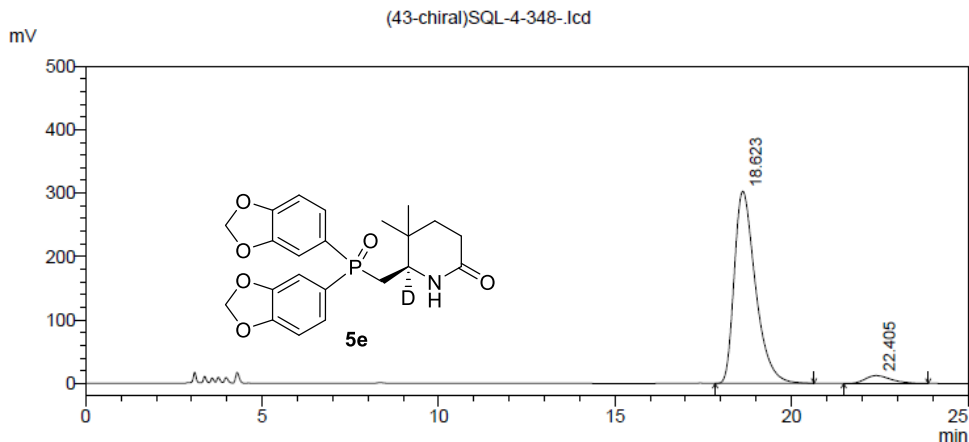

<Data Analysis>

| Pesck # | Ret. Time | Height | Area     | Area%   |
|---------|-----------|--------|----------|---------|
| 1       | 18.623    | 302727 | 12662082 | 95.239  |
| 2       | 22.405    | 12449  | 632928   | 4.761   |
| Total   |           | 315176 | 13295010 | 100.000 |

## Supplementary Figure 209. HPLC spectrum of **5e**

<sup>1</sup>H NMR (400 MHz, room temperature, CDCl<sub>3</sub>)

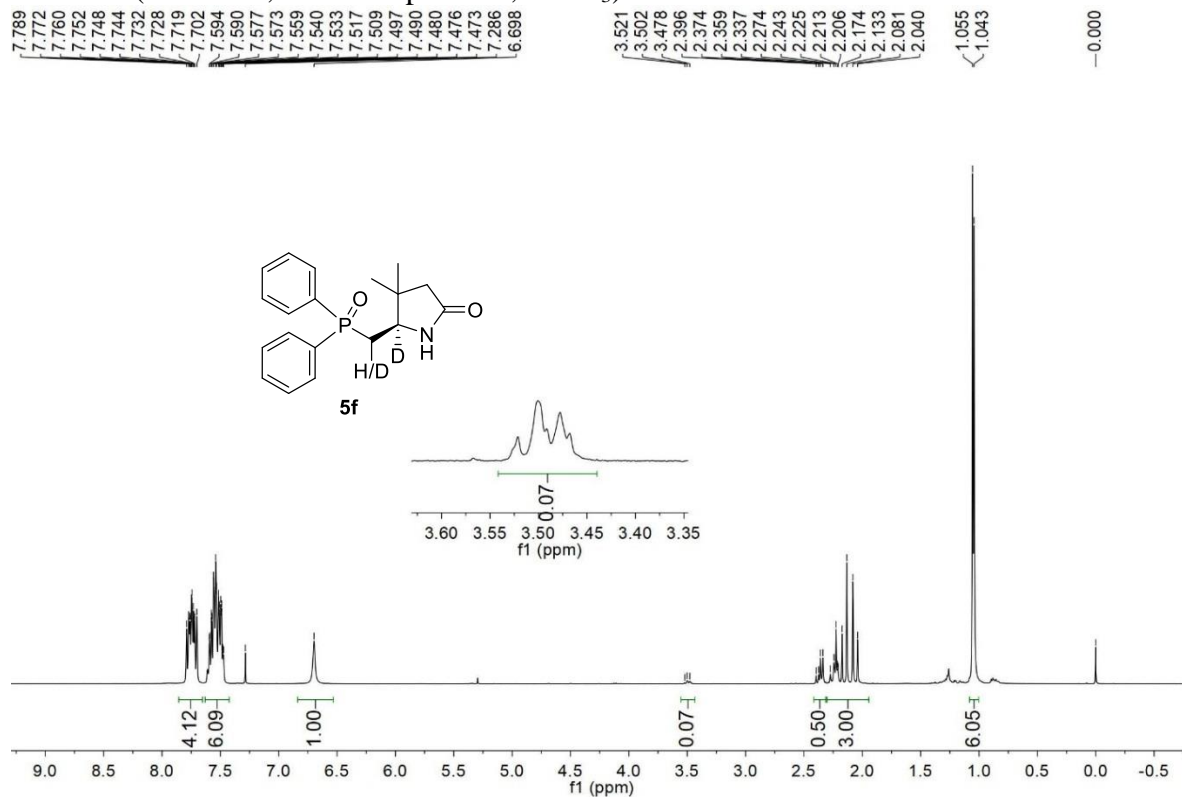

Supplementary Figure 210. <sup>1</sup>H NMR spectrum of compound **5f**

<sup>13</sup>C NMR (100 MHz, room temperature, CDCl<sub>3</sub>)

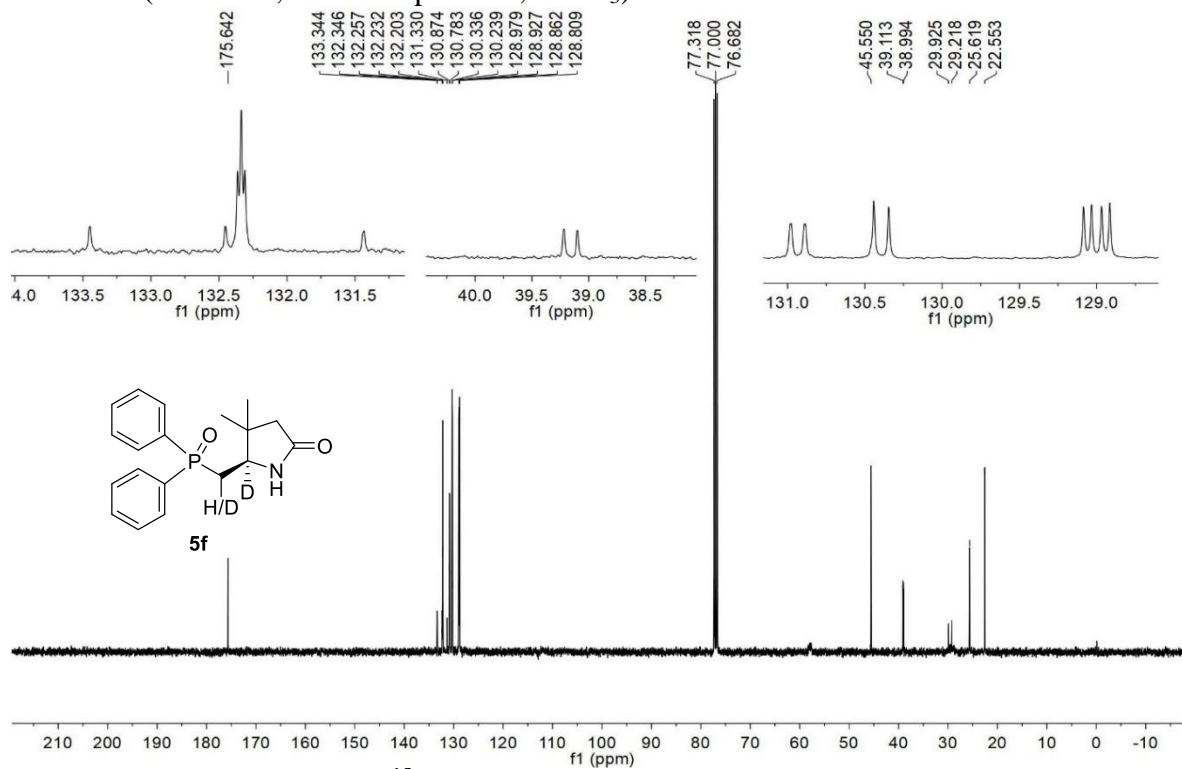

Supplementary Figure 211. <sup>13</sup>C NMR spectrum of compound **5f**



$^{31}\text{P}$  NMR (162 MHz, room temperature,  $\text{CDCl}_3$ )

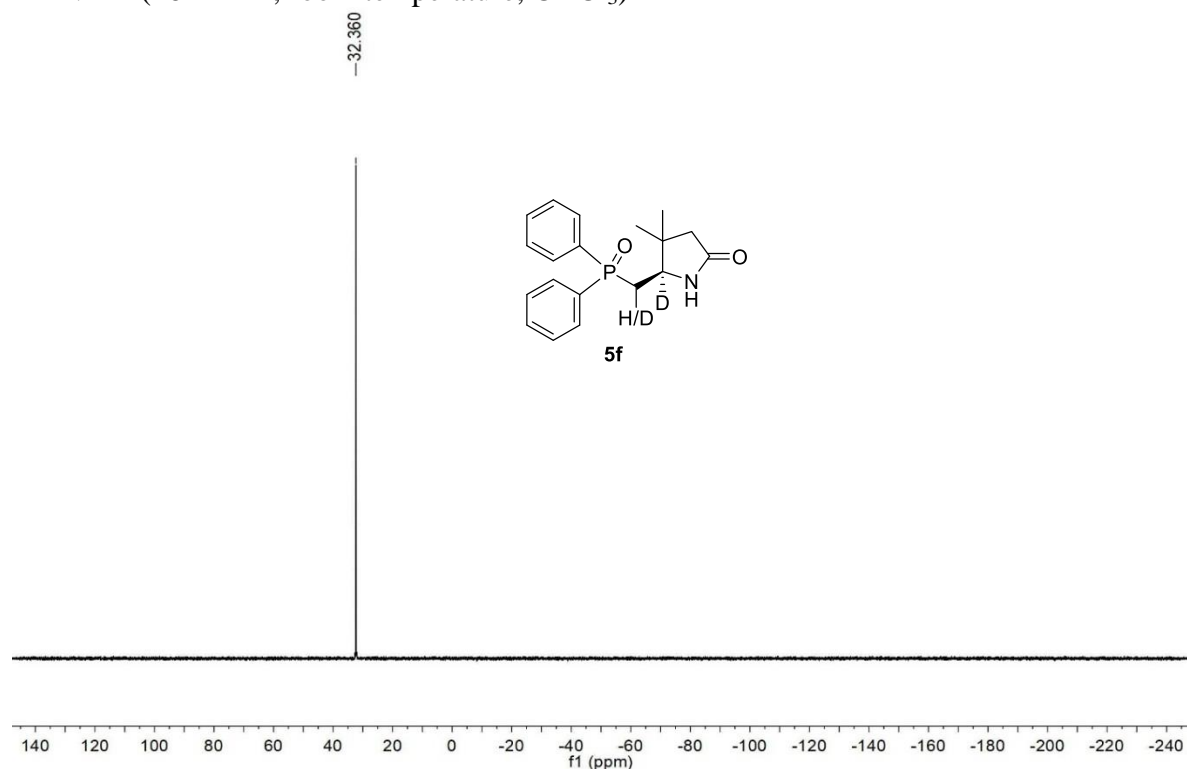

**Supplementary Figure 212.**  $^{31}\text{P}$  NMR spectrum of compound **5f**

HPLC spectrum of racemic **5f**

Data File : (45-racemic)SQL-4-257-1.lcd  
Method File : 3AD-H-60-0.5-214.lcm  
Date Processed : 7/17/2021 12:37:54 PM

<Chromatogram View>

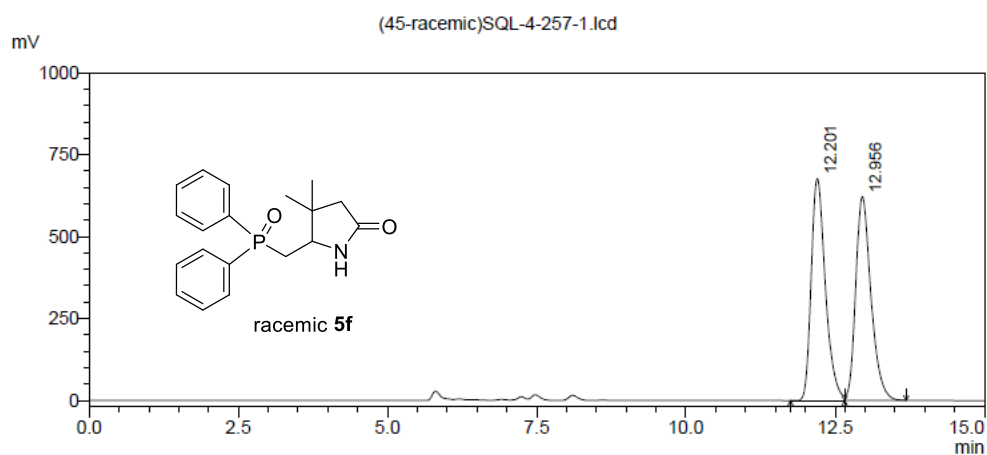

<Data Analysis>

| DetA 214nm |           |         |          |         |
|------------|-----------|---------|----------|---------|
| Pesk #     | Ret. Time | Height  | Area     | Area%   |
| 1          | 12.201    | 677394  | 11212447 | 50.272  |
| 2          | 12.956    | 622130  | 11090952 | 49.728  |
| Total      |           | 1299525 | 22303399 | 100.000 |

**Supplementary Figure 213.** HPLC spectrum of racemic **5f**

# HPLC spectrum of **5f**

Data File : (4S-chiral) SQL-4-288.lcd  
 Method File : 3AD-H-60-0.5-214.lcm  
 Date Processed : 7/17/2021 12:37:41 PM

<Chromatogram View>

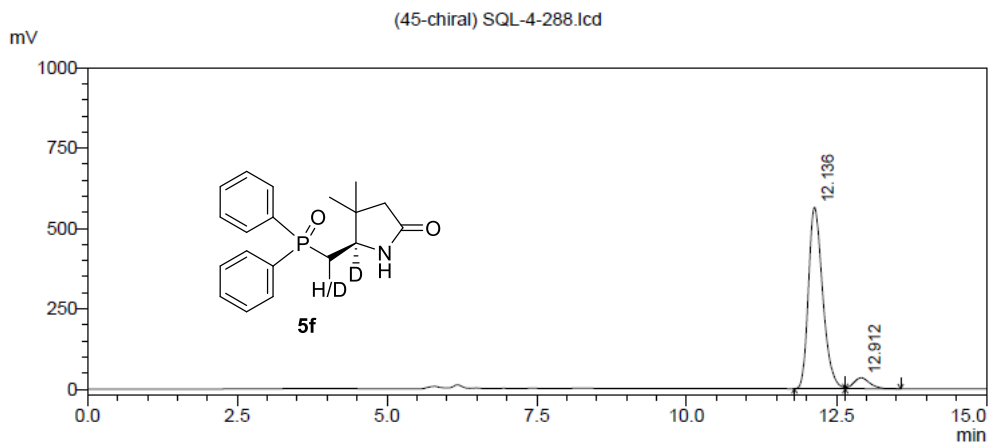

<Data Analysis>

| Peak # | Ret. Time | Height | Area    | Area%   |
|--------|-----------|--------|---------|---------|
| 1      | 12.136    | 564140 | 9339706 | 93.695  |
| 2      | 12.912    | 33813  | 628468  | 6.305   |
| Total  |           | 597953 | 9968173 | 100.000 |

## Supplementary Figure 214. HPLC spectrum of **5f**

$^1\text{H}$  NMR (400 MHz, room temperature,  $\text{CDCl}_3$ )

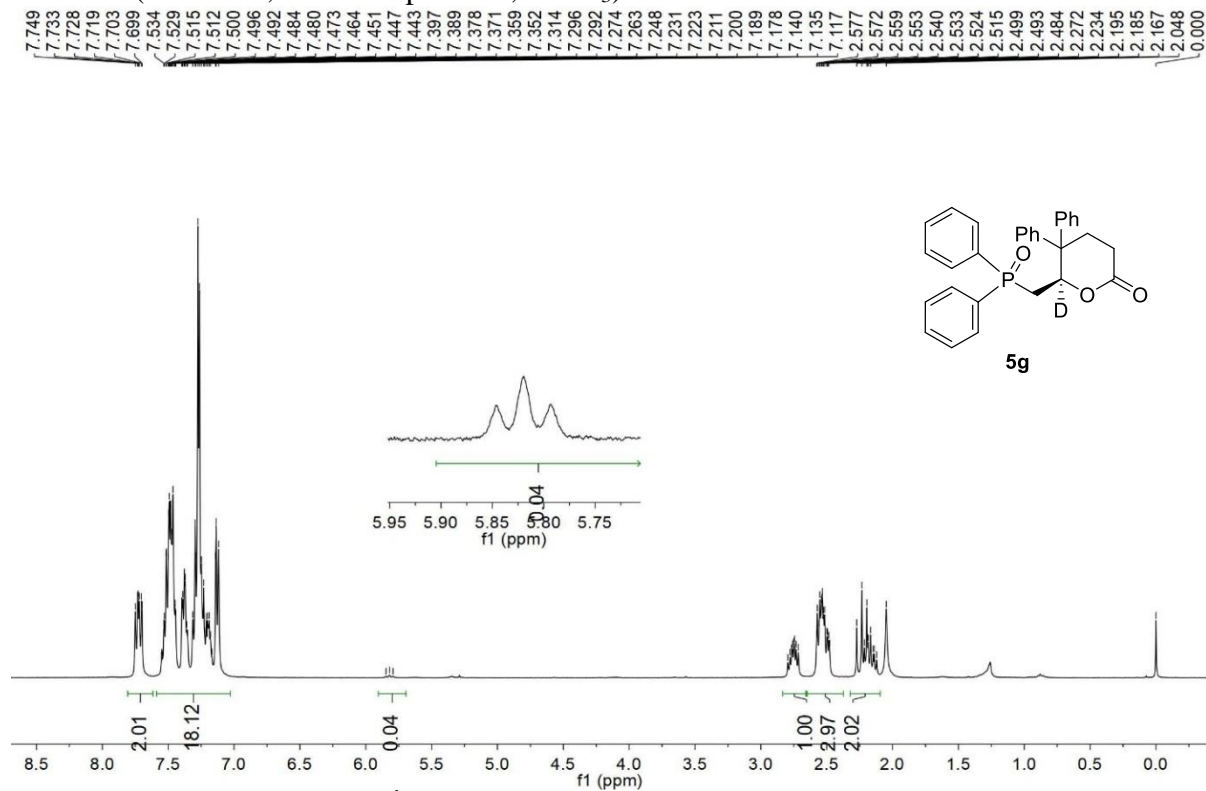

## Supplementary Figure 215. $^1\text{H}$ NMR spectrum of compound **5g**

$^{13}\text{C}$  NMR (100 MHz, room temperature,  $\text{CDCl}_3$ )

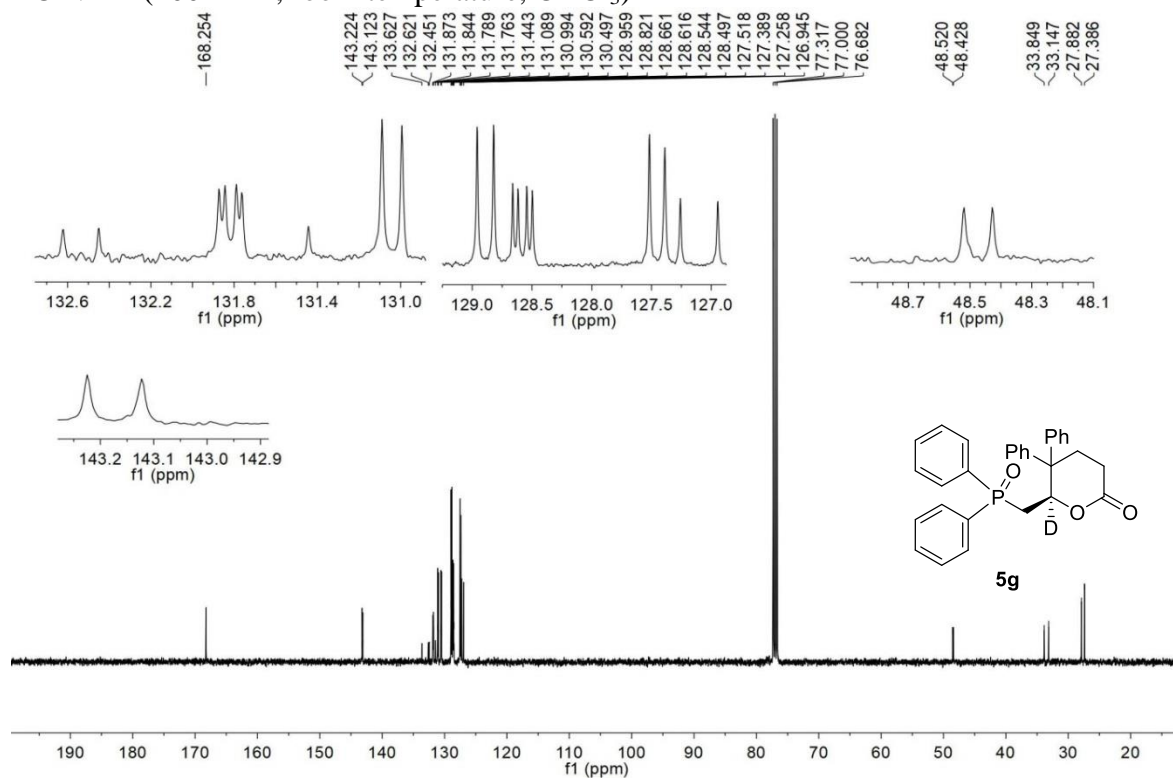

Supplementary Figure 216.  $^{13}\text{C}$  NMR spectrum of compound **5g**

$^{31}\text{P}$  NMR (162 MHz, room temperature,  $\text{CDCl}_3$ )

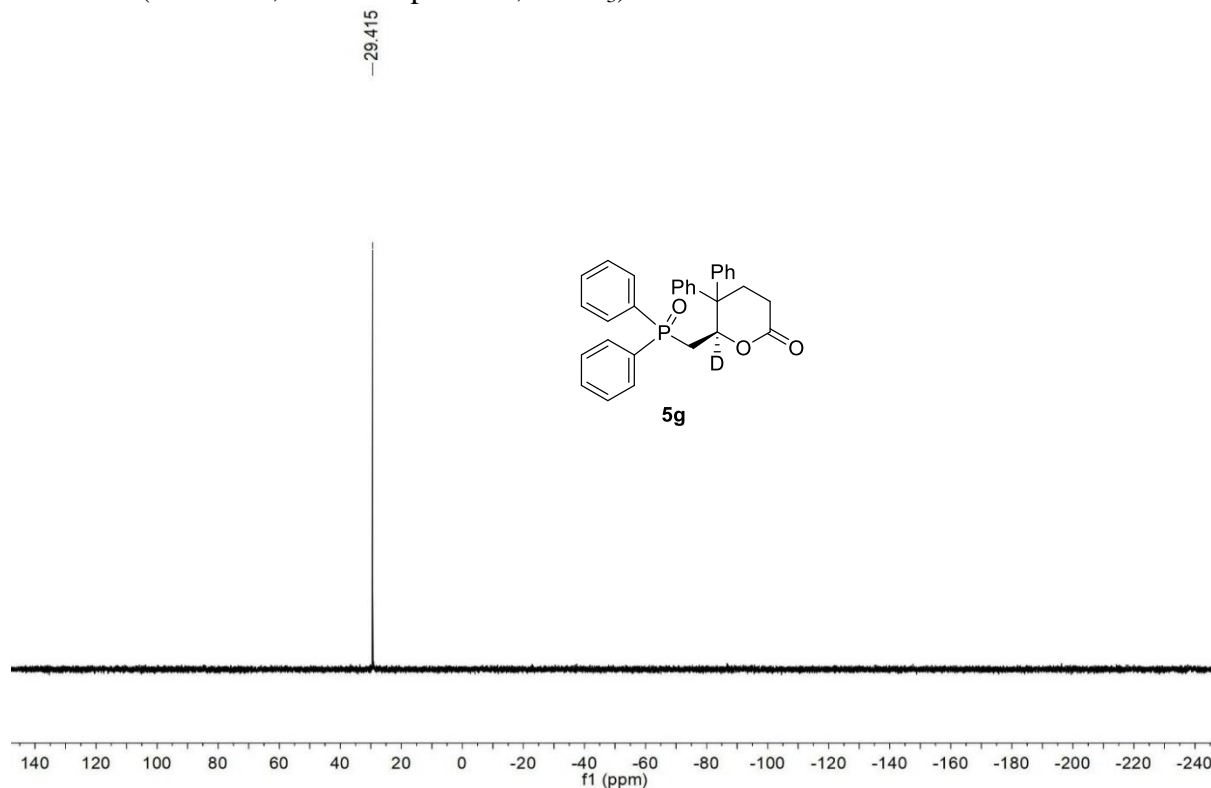

Supplementary Figure 217.  $^{31}\text{P}$  NMR spectrum of compound **5g**

## HPLC spectrum of racemic **5g**

Data File : 46-RACEMIC-SQL-4-289-1.lcd  
Method File : 3AD-H-70-1-214.lcm  
Date Processed : 7/17/2021 12:40:21 PM

<Chromatogram View>

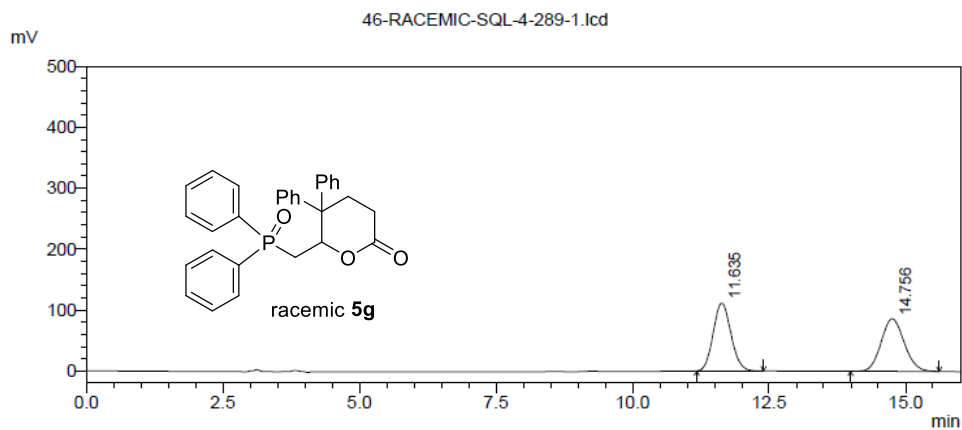

<Data Analysis>

| DetA 214nm |           |        |         |         |
|------------|-----------|--------|---------|---------|
| Pesk #     | Ret. Time | Height | Area    | Area%   |
| 1          | 11.635    | 111521 | 2530479 | 49.917  |
| 2          | 14.756    | 86225  | 2538888 | 50.083  |
| Total      |           | 197746 | 5069366 | 100.000 |

## Supplementary Figure 218. HPLC spectrum of racemic **5g**

### HPLC spectrum of **5g**

Data File : 46-CHIRAL-SQL-4-287-4.lcd  
Method File : 3AD-H-70-1-214.lcm  
Date Processed : 7/17/2021 12:38:56 PM

<Chromatogram View>

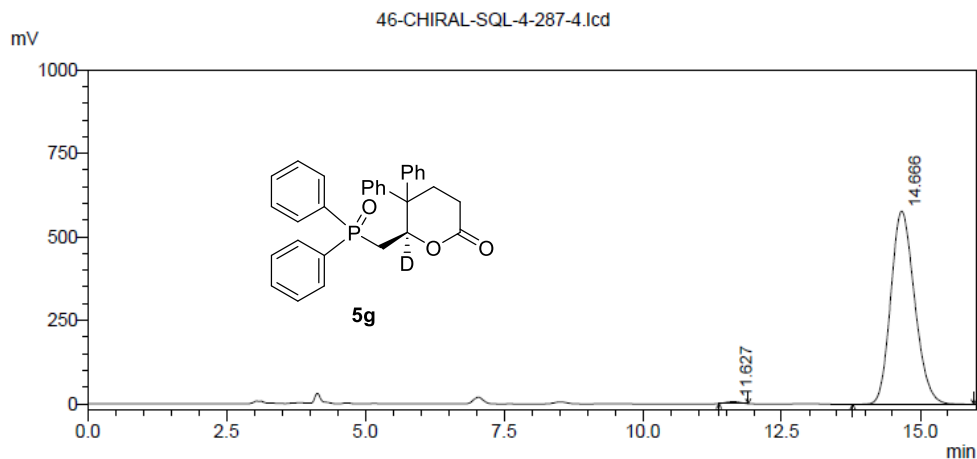

<Data Analysis>

| DetA 214nm |           |        |          |         |
|------------|-----------|--------|----------|---------|
| Pesk #     | Ret. Time | Height | Area     | Area%   |
| 1          | 11.627    | 6014   | 105956   | 0.608   |
| 2          | 14.666    | 578274 | 17333080 | 99.392  |
| Total      |           | 584288 | 17439035 | 100.000 |

## Supplementary Figure 219. HPLC spectrum of **5g**

$^1\text{H}$  NMR (400 MHz, room temperature,  $\text{CDCl}_3$ )

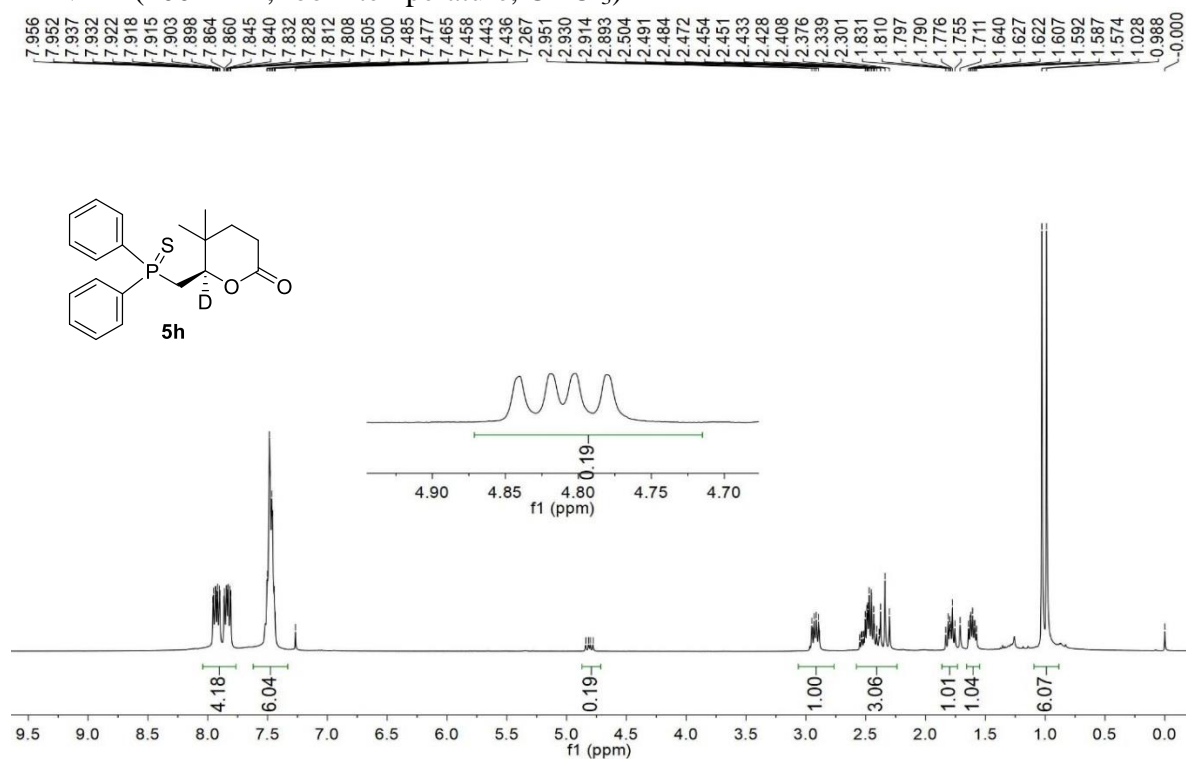

**Supplementary Figure 220.**  $^1\text{H}$  NMR spectrum of compound **5h**

$^{13}\text{C}$  NMR (100 MHz, room temperature,  $\text{CDCl}_3$ )

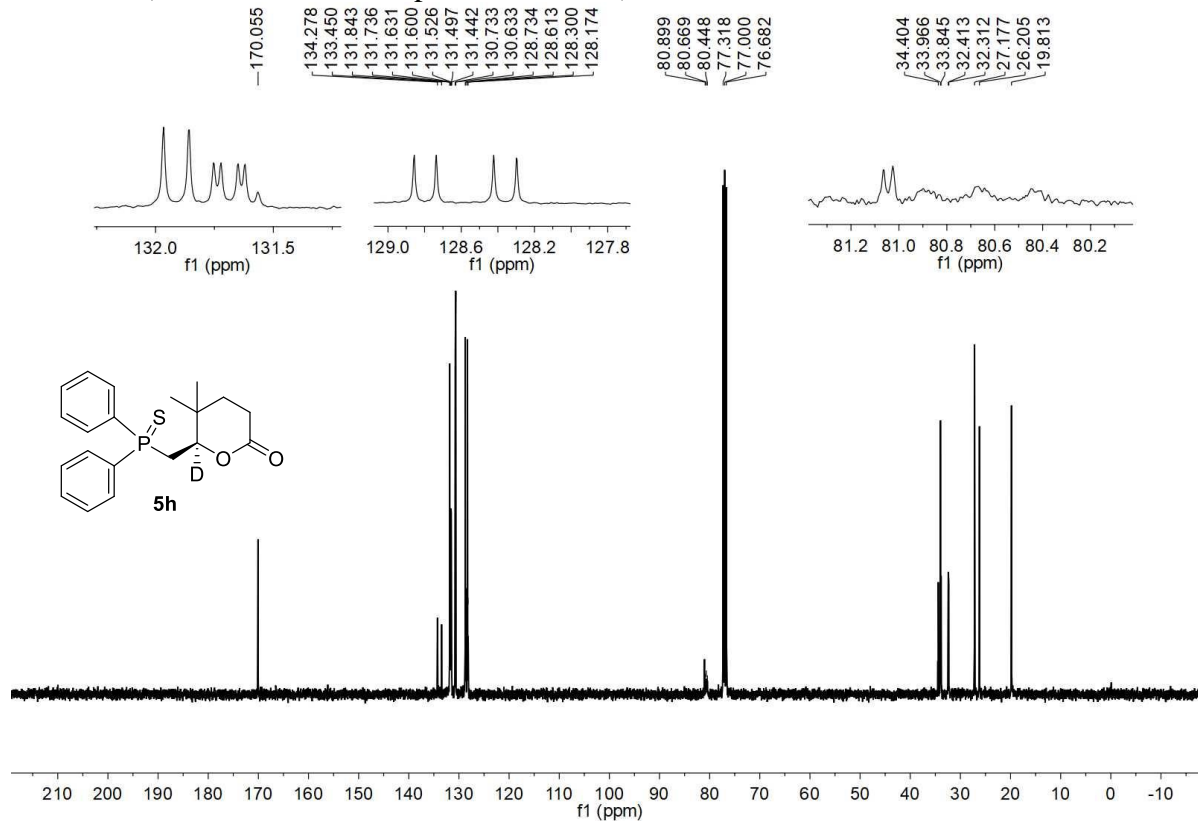

**Supplementary Figure 221.**  $^{13}\text{C}$  NMR spectrum of compound **5h**

$^{31}\text{P}$  NMR (162 MHz, room temperature,  $\text{CDCl}_3$ )

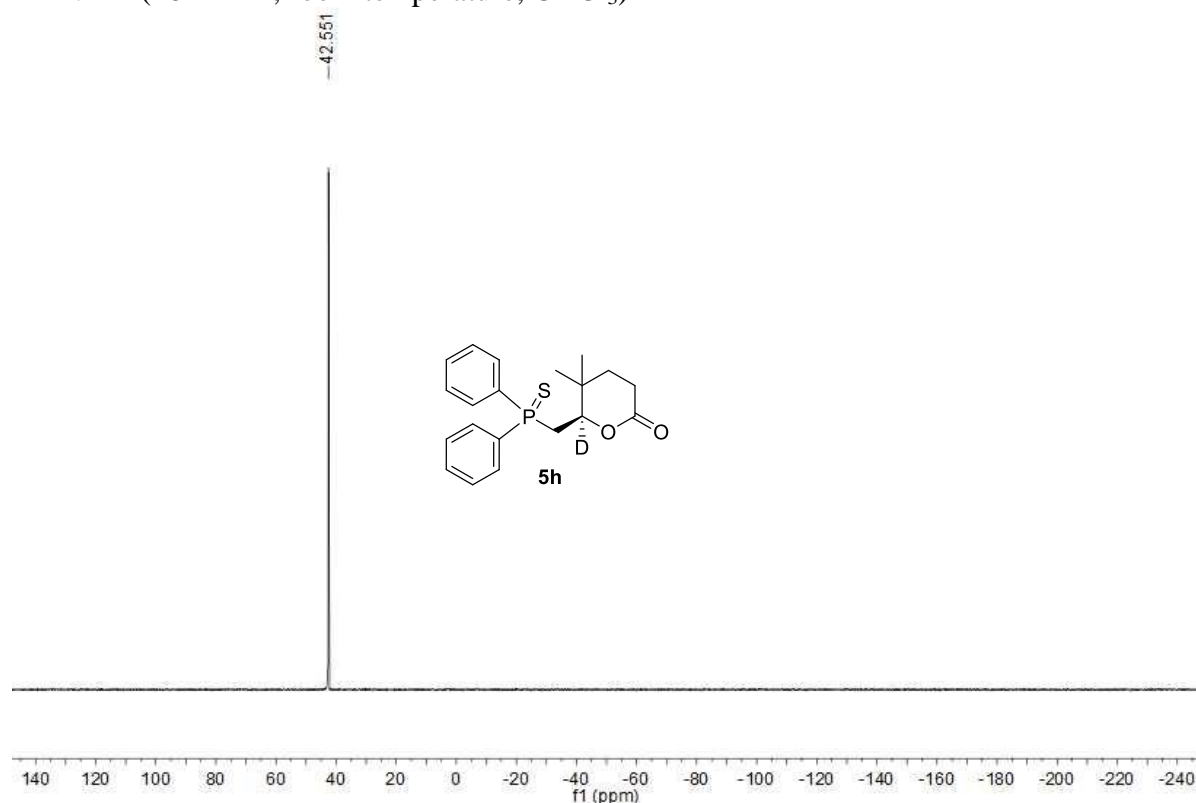

Supplementary Figure 222.  $^{31}\text{P}$  NMR spectrum of compound **5h**

HPLC spectrum of racemic **5h**

Data File : SQL-4-293-1.lcd  
Method File : 4OD-H-88-12-1-214.lcm  
Date Processed : 12/29/2020 10:09:02 AM

<Chromatogram View>

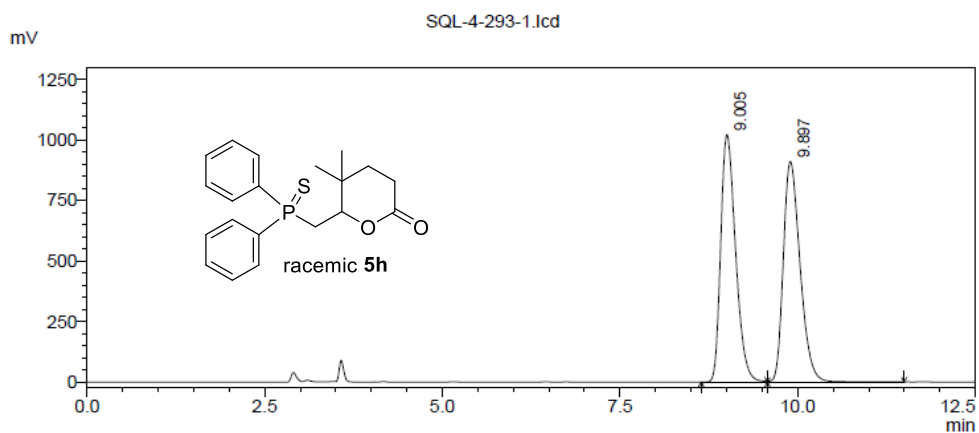

<Data Analysis>

| Peak # | Ret. Time | Height  | Area     | Area%   |
|--------|-----------|---------|----------|---------|
| 1      | 9.005     | 1021626 | 14843963 | 49.842  |
| 2      | 9.897     | 910249  | 14938074 | 50.158  |
| Total  |           | 1931875 | 29782037 | 100.000 |

Supplementary Figure 223. HPLC spectrum of racemic **5h**

## HPLC spectrum of **5h**

Data File : SQL-4-293-2-1.lcd  
 Method File : 4OD-H-88-12-1-214.lcm  
 Date Processed : 12/29/2020 10:48:54 AM

<Chromatogram View>

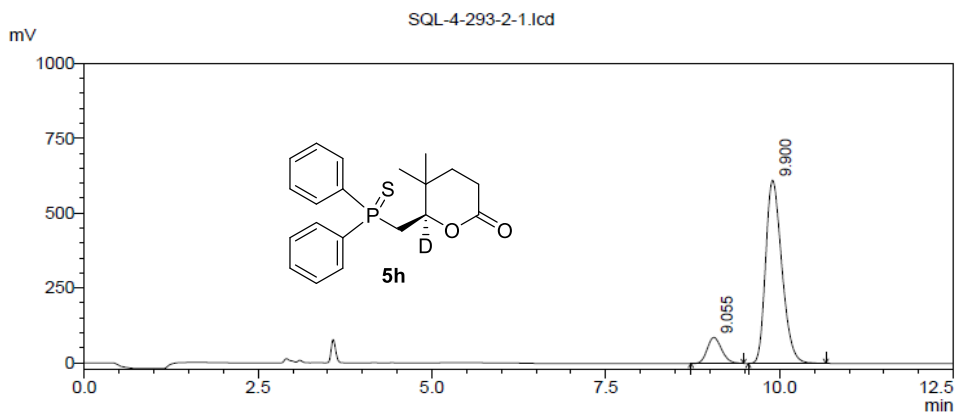

<Data Analysis>

| Peak # | Ret. Time | Height | Area     | Area%   |
|--------|-----------|--------|----------|---------|
| 1      | 9.055     | 86780  | 1251077  | 11.206  |
| 2      | 9.900     | 610785 | 9912913  | 88.794  |
| Total  |           | 697566 | 11163990 | 100.000 |

## Supplementary Figure 224. HPLC spectrum of **5h**

$^1\text{H}$  NMR (400 MHz, room temperature,  $\text{CDCl}_3$ )

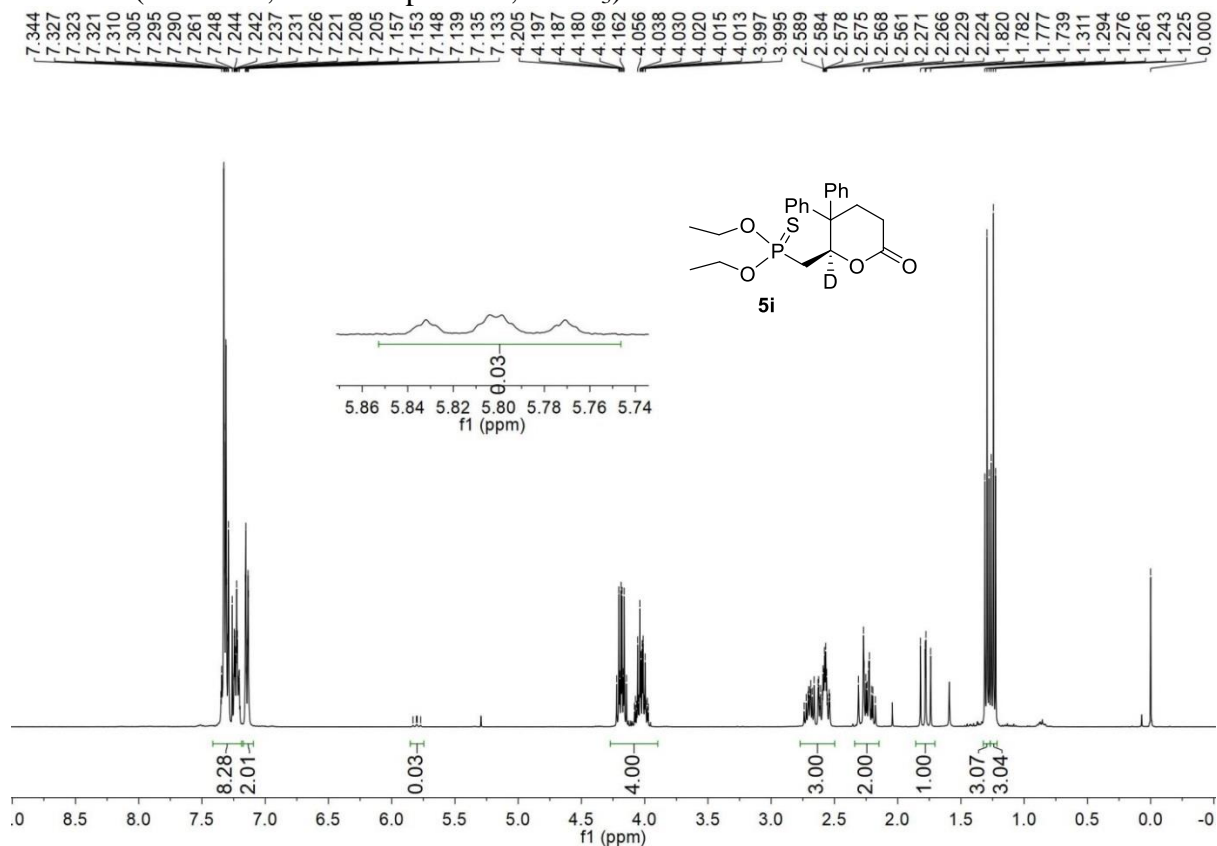

## Supplementary Figure 225. $^1\text{H}$ NMR spectrum of compound **5i**

$^{13}\text{C}$  NMR (100 MHz, room temperature,  $\text{CDCl}_3$ )

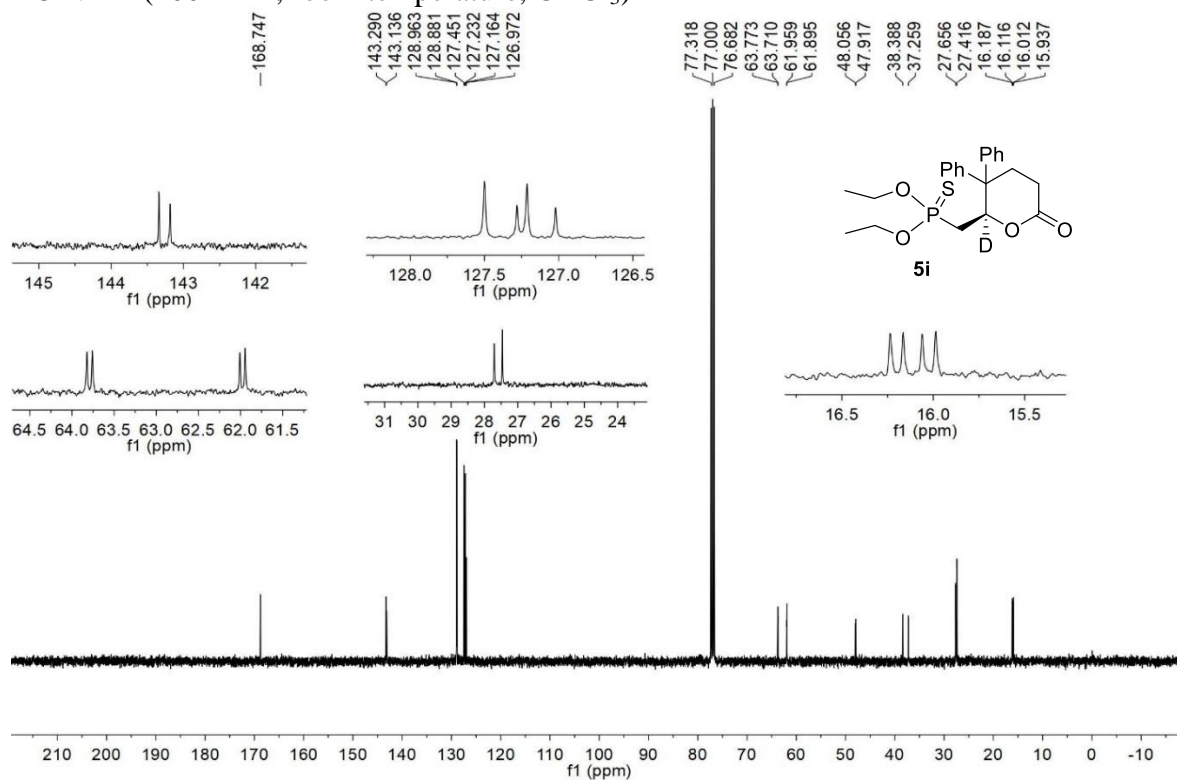

Supplementary Figure 226.  $^{13}\text{C}$  NMR spectrum of compound **5i**

$^{31}\text{P}$  NMR (162 MHz, room temperature,  $\text{CDCl}_3$ )

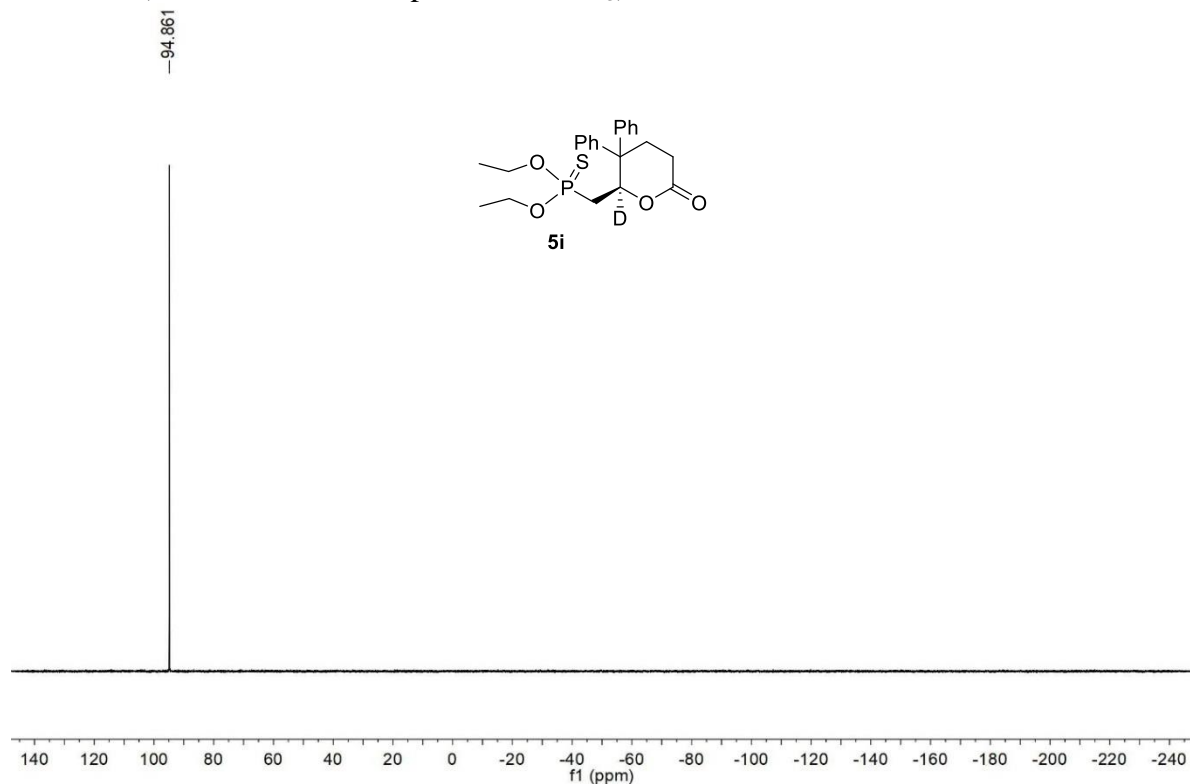

Supplementary Figure 227.  $^{31}\text{P}$  NMR spectrum of compound **5i**



## HPLC spectrum of racemic **5i**

Data File : (47-racemic)SQL-4-311-1.lcd  
 Method File : 6IC-H-80-0.5-214.lcm  
 Date Processed : 7/17/2021 12:41:00 PM

<Chromatogram View>

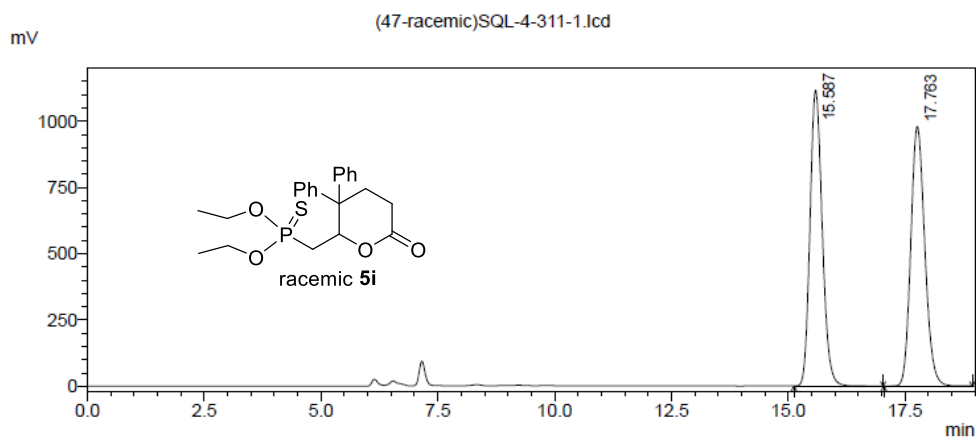

<Data Analysis>

| DetA 214nm |           |         |          |         |
|------------|-----------|---------|----------|---------|
| Pesk #     | Ret. Time | Height  | Area     | Area%   |
| 1          | 15.587    | 1115972 | 20368157 | 49.843  |
| 2          | 17.763    | 979003  | 20496395 | 50.157  |
| Total      |           | 2094975 | 40864552 | 100.000 |

## Supplementary Figure 228. HPLC spectrum of racemic **5i**

### HPLC spectrum of **5i**

Data File : (47-chiral)SQL-4-311-2.lcd  
 Method File : 6IC-H-80-0.5-214.lcm  
 Date Processed : 7/17/2021 12:40:39 PM

<Chromatogram View>

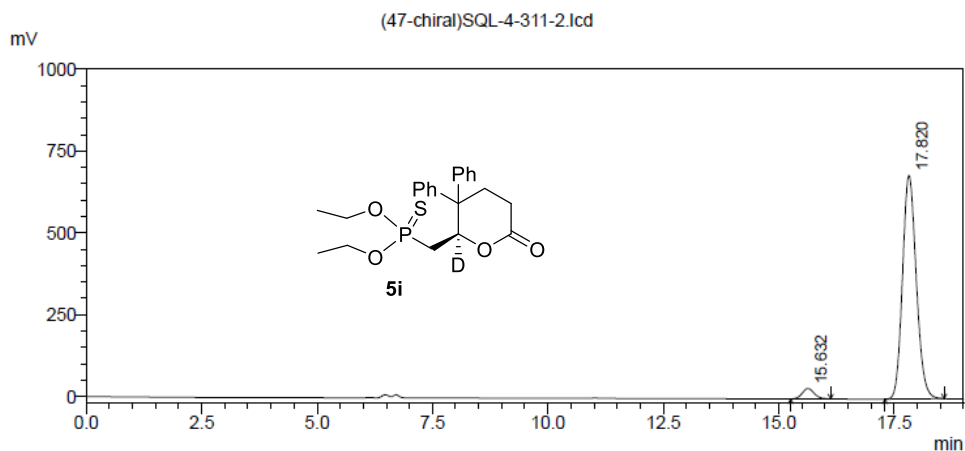

<Data Analysis>

| DetA 214nm |           |        |          |         |
|------------|-----------|--------|----------|---------|
| Pesk #     | Ret. Time | Height | Area     | Area%   |
| 1          | 15.632    | 31613  | 567133   | 3.848   |
| 2          | 17.820    | 681972 | 14170277 | 96.152  |
| Total      |           | 713585 | 14737410 | 100.000 |

## Supplementary Figure 229. HPLC spectrum of **5i**

$^1\text{H}$  NMR (400 MHz, room temperature,  $\text{CDCl}_3$ )

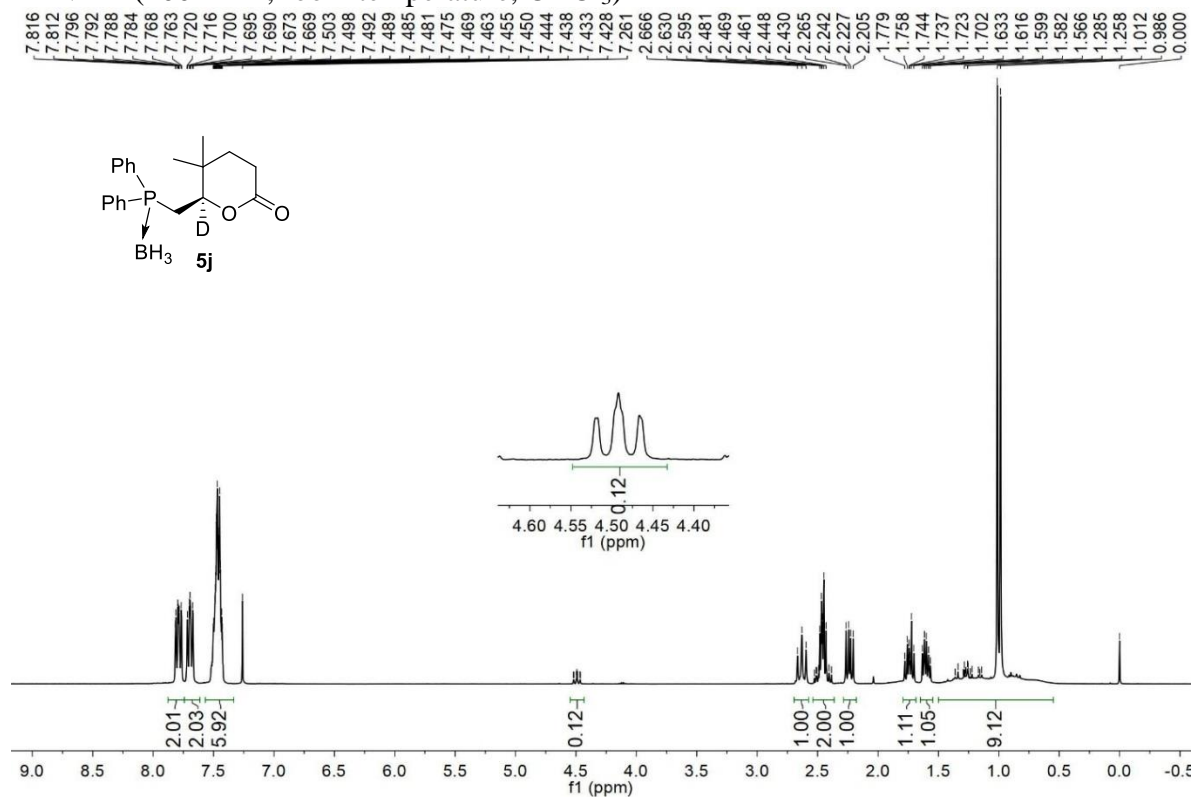

Supplementary Figure 230.  $^1\text{H}$  NMR spectrum of compound **5j**

$^{13}\text{C}$  NMR (100 MHz, room temperature,  $\text{CDCl}_3$ )

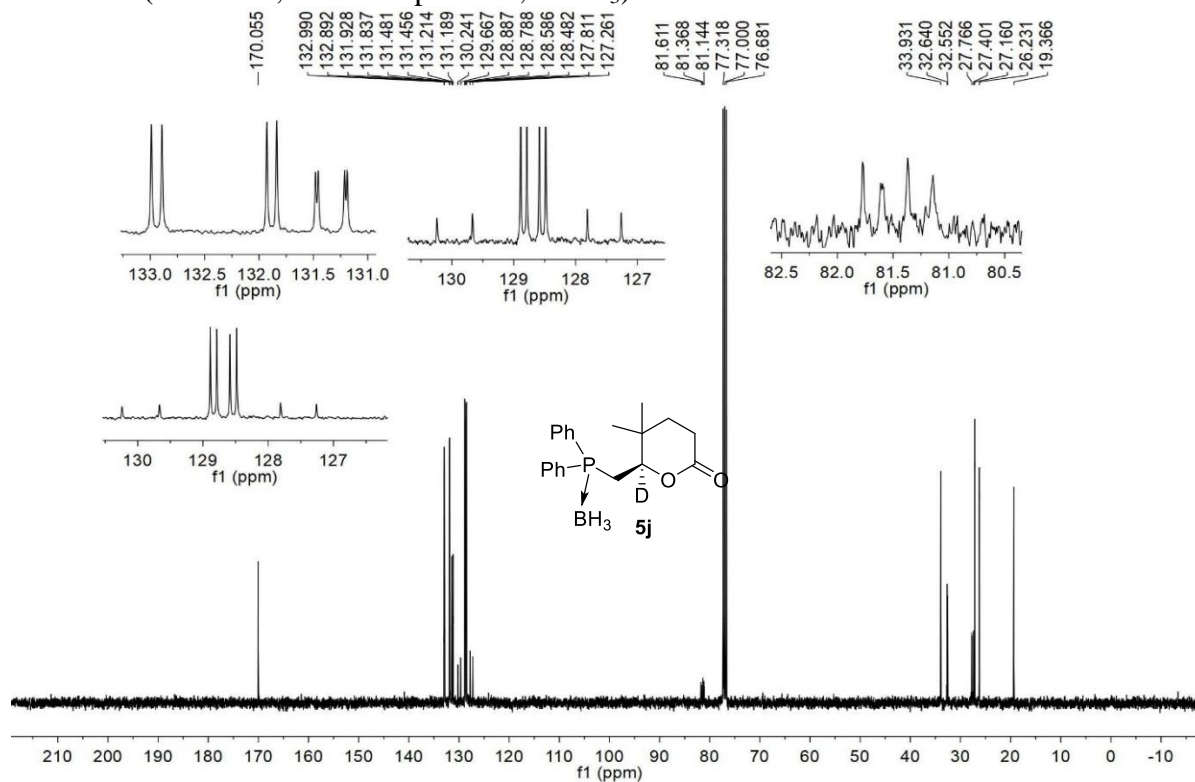

Supplementary Figure 231.  $^{13}\text{C}$  NMR spectrum of compound **5j**

$^{31}\text{P}$  NMR (162 MHz, room temperature,  $\text{CDCl}_3$ )

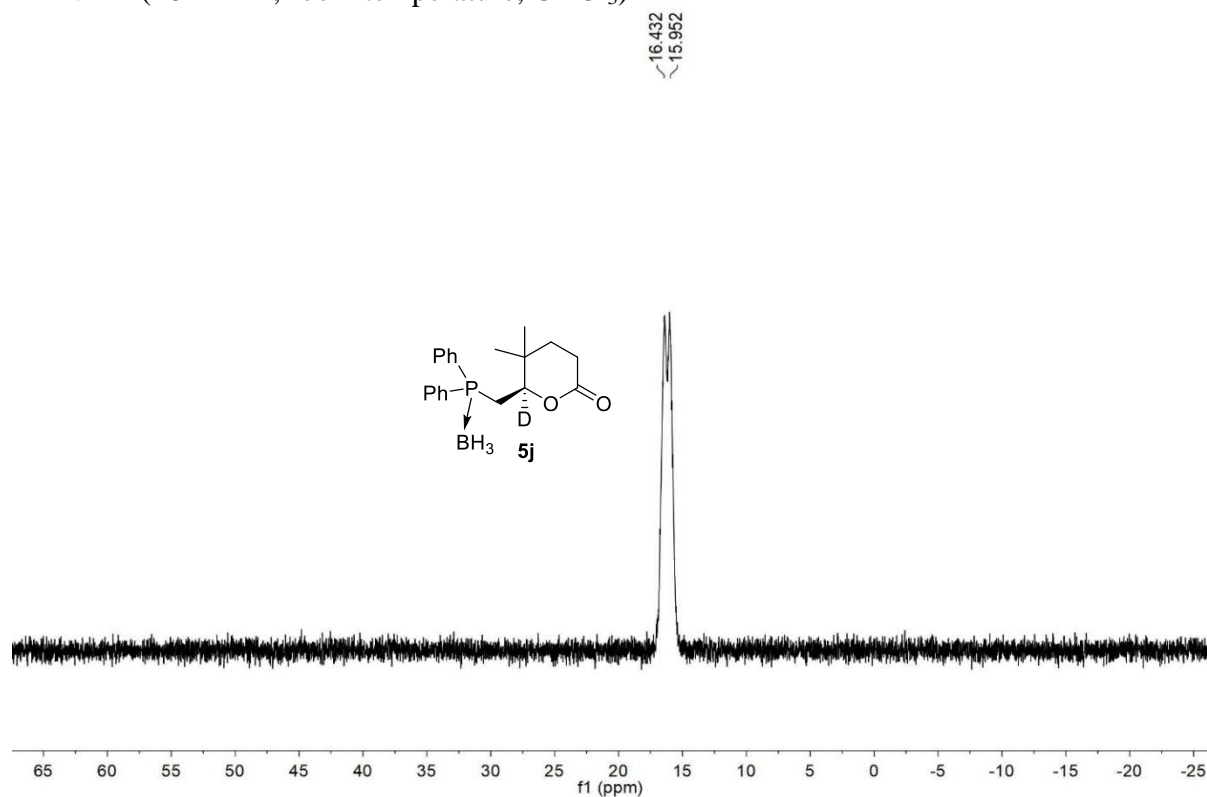

**Supplementary Figure 232.**  $^{31}\text{P}$  NMR spectrum of compound **5j**

$^{11}\text{B}$  NMR (128 MHz, room temperature,  $\text{CDCl}_3$ )

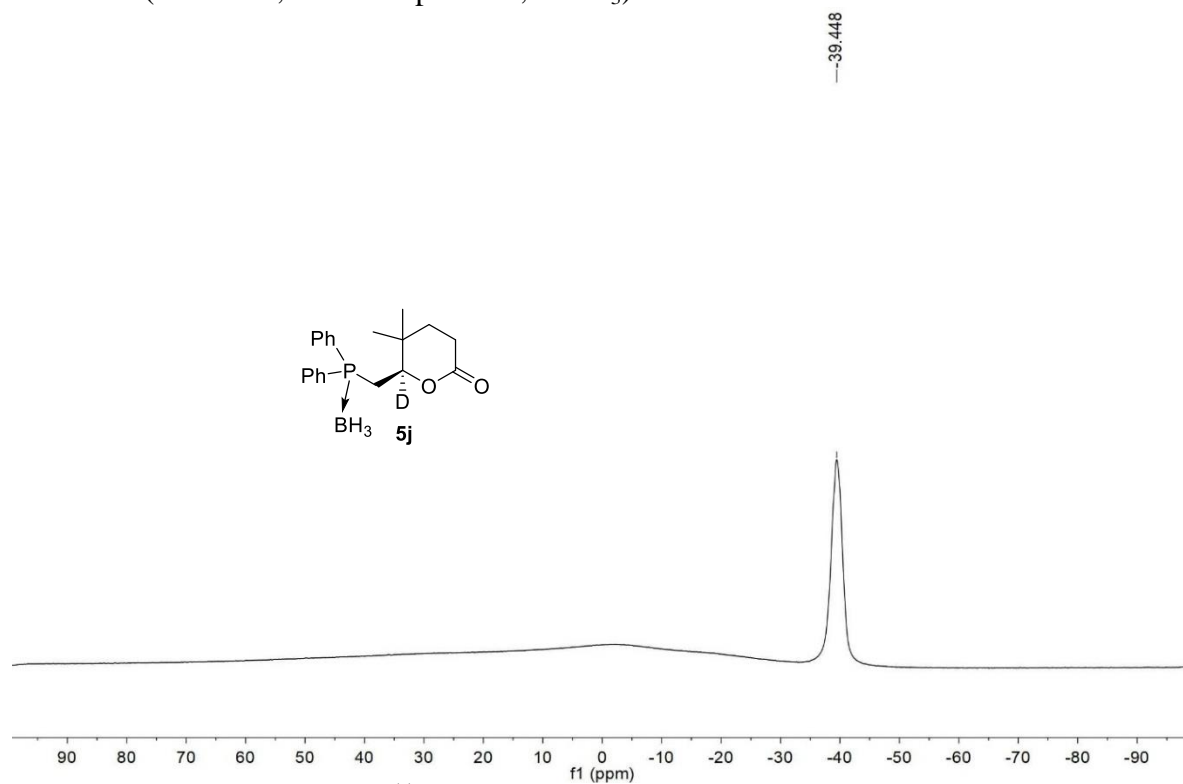

**Supplementary Figure 233.**  $^{11}\text{B}$  NMR spectrum of compound **5j**

### HPLC spectrum of racemic **5j**

Data File : 48-sql-6-21-1racemic.lcd  
 Method File : 3AD-H-70-0.8-214.lcm  
 Date Processed : 8/8/2021 1:50:08 PM

<Chromatogram View>

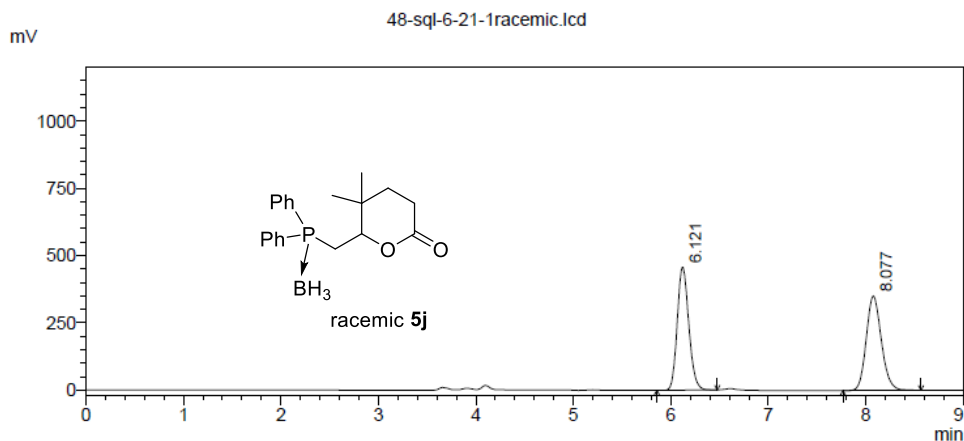

<Data Analysis>

Detector A 214nm

| Peak # | Ret. Time | Height | Area    | Area%   |
|--------|-----------|--------|---------|---------|
| 1      | 6.121     | 457298 | 3768535 | 50.019  |
| 2      | 8.077     | 350424 | 3765707 | 49.981  |
| Total  |           | 807723 | 7534242 | 100.000 |

### Supplementary Figure 234. HPLC spectrum of racemic **5j**

### HPLC spectrum of **5j**

Data File : 48-SQL-6-21-2chiral.lcd  
 Method File : 3AD-H-70-0.8-214.lcm  
 Date Processed : 8/8/2021 1:50:54 PM

<Chromatogram View>

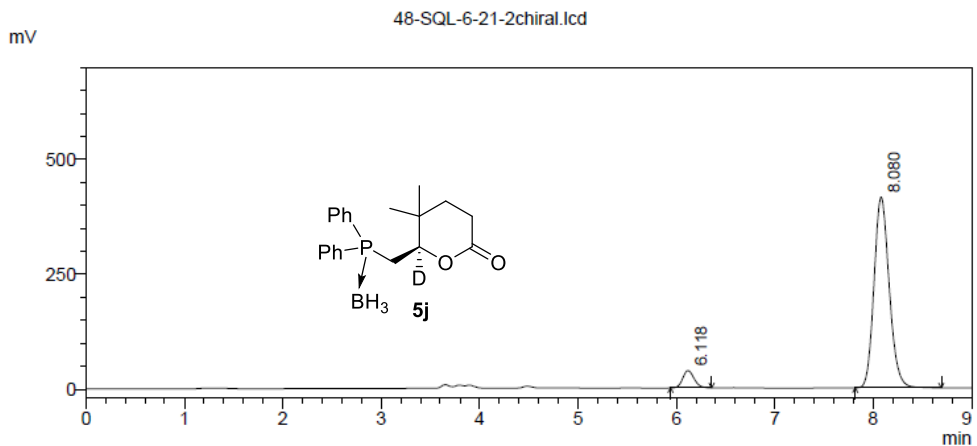

<Data Analysis>

Detector A 214nm

| Peak # | Ret. Time | Height | Area    | Area%   |
|--------|-----------|--------|---------|---------|
| 1      | 6.118     | 37678  | 300613  | 6.303   |
| 2      | 8.080     | 414892 | 4468382 | 93.697  |
| Total  |           | 452570 | 4768994 | 100.000 |

### Supplementary Figure 235. HPLC spectrum of **5j**

$^1\text{H}$  NMR (400 MHz, room temperature,  $\text{CDCl}_3$ )

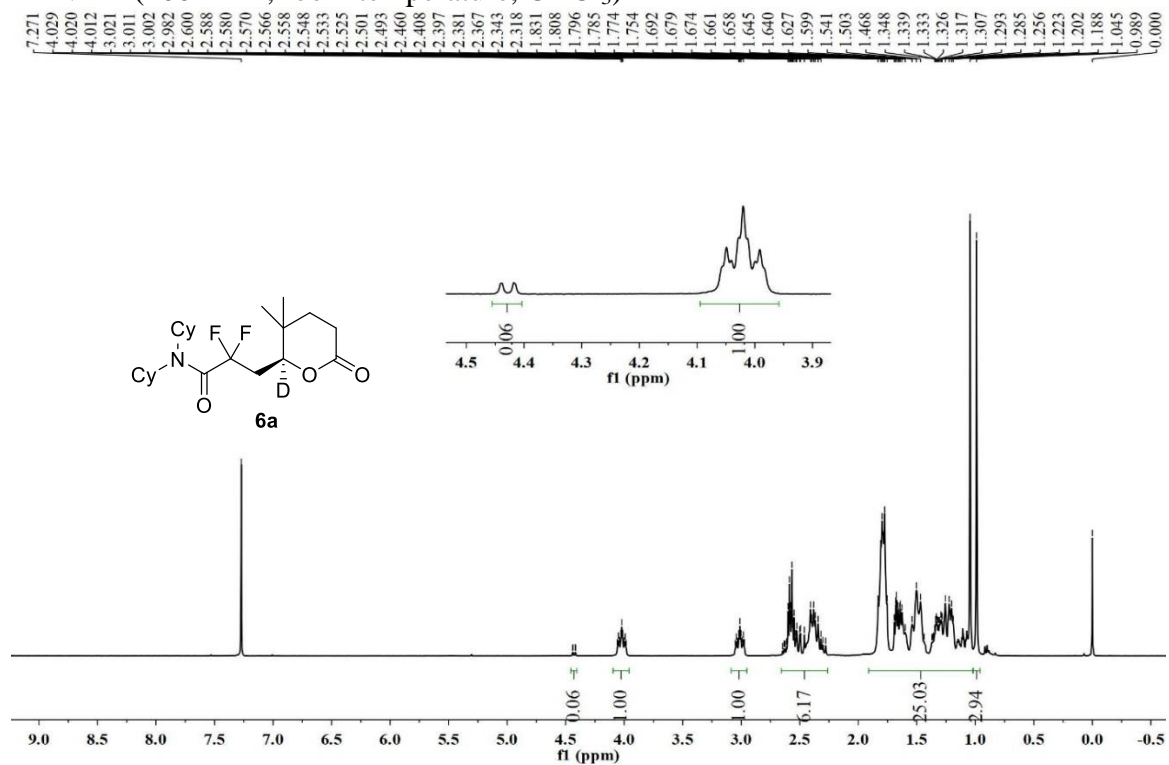

Supplementary Figure 236.  $^1\text{H}$  NMR spectrum of compound **6a**

$^{13}\text{C}$  NMR (100 MHz, room temperature,  $\text{CDCl}_3$ )

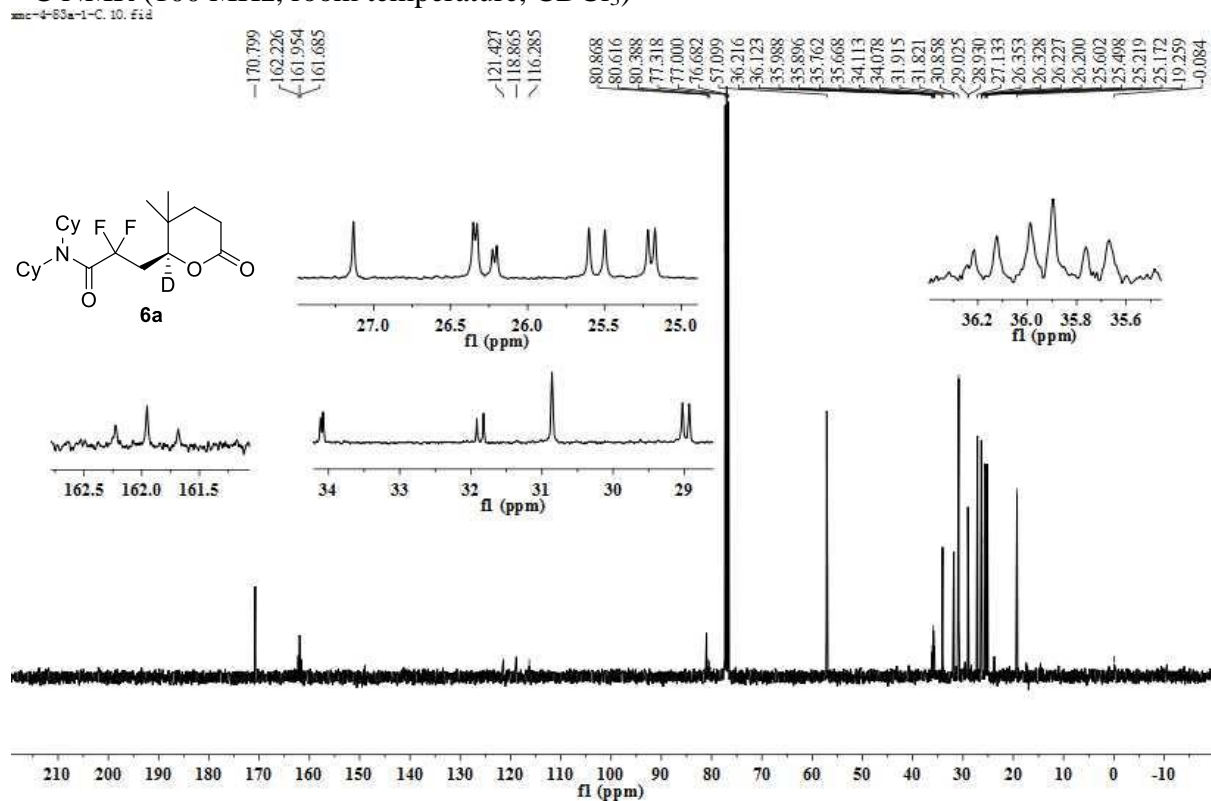

Supplementary Figure 237.  $^{13}\text{C}$  NMR spectrum of compound **6a**

$^{19}\text{F}$  NMR (376 MHz, room temperature,  $\text{CDCl}_3$ )

Sep04-2021-xmc-4-81a-f. 10. fid

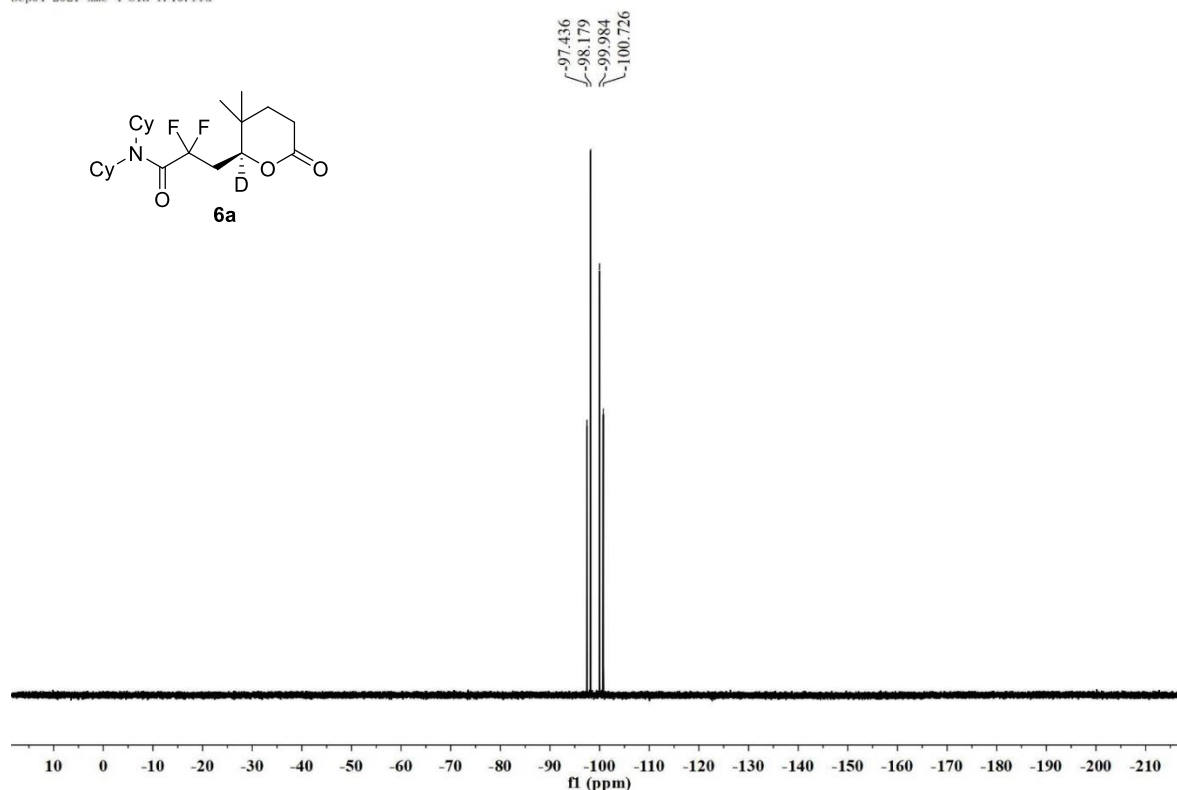

Supplementary Figure 238.  $^{19}\text{F}$  NMR spectrum of compound **6a**

HPLC spectrum of racemic **6a**

Data File : XMC-2-85a-210805.lcd  
Method File : 3AD-H-90-0.5-214.lcm  
Date Processed : 8/5/2021 2:25:58 PM

<Chromatogram View>

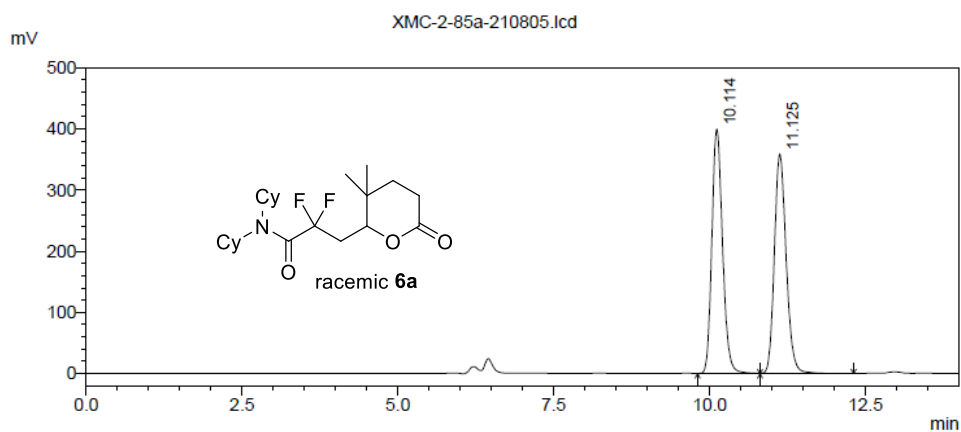

<Data Analysis>

| Detector A 214nm |           |        |         |         |
|------------------|-----------|--------|---------|---------|
| Peak #           | Ret. Time | Height | Area    | Area%   |
| 1                | 10.114    | 399842 | 4782963 | 50.216  |
| 2                | 11.125    | 358998 | 4741808 | 49.784  |
| Total            |           | 758840 | 9524771 | 100.000 |

Supplementary Figure 239. HPLC spectrum of racemic **6a**

# HPLC spectrum of 6a

Data File : xmc-4-146-1-1.lcd  
 Method File : 3AD-H-90-0.5-214.lcm  
 Date Processed : 10/19/2021 2:44:29 PM

<Chromatogram View>

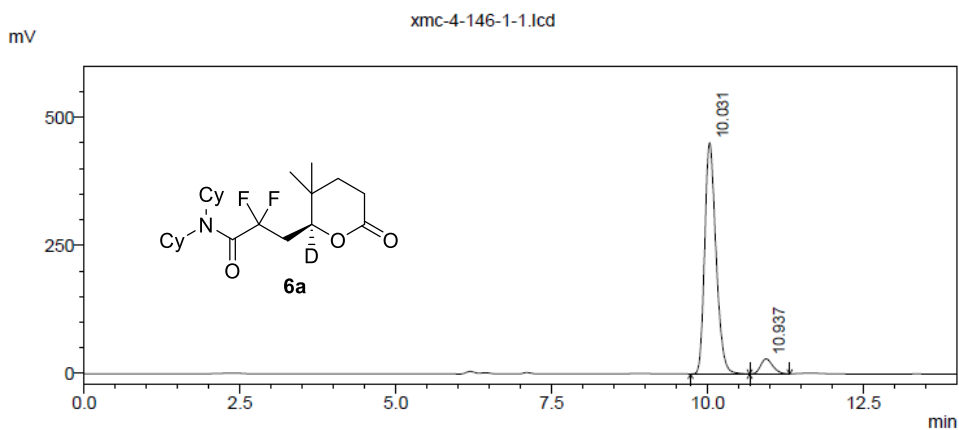

<Data Analysis>

| Detector A 214nm |           |        |         |         |
|------------------|-----------|--------|---------|---------|
| Peak #           | Ret. Time | Height | Area    | Area%   |
| 1                | 10.031    | 451215 | 5719342 | 93.182  |
| 2                | 10.937    | 29929  | 418501  | 6.818   |
| Total            |           | 481143 | 6137843 | 100.000 |

## Supplementary Figure 240. HPLC spectrum of 6a

<sup>1</sup>H NMR (400 MHz, room temperature, CDCl<sub>3</sub>)

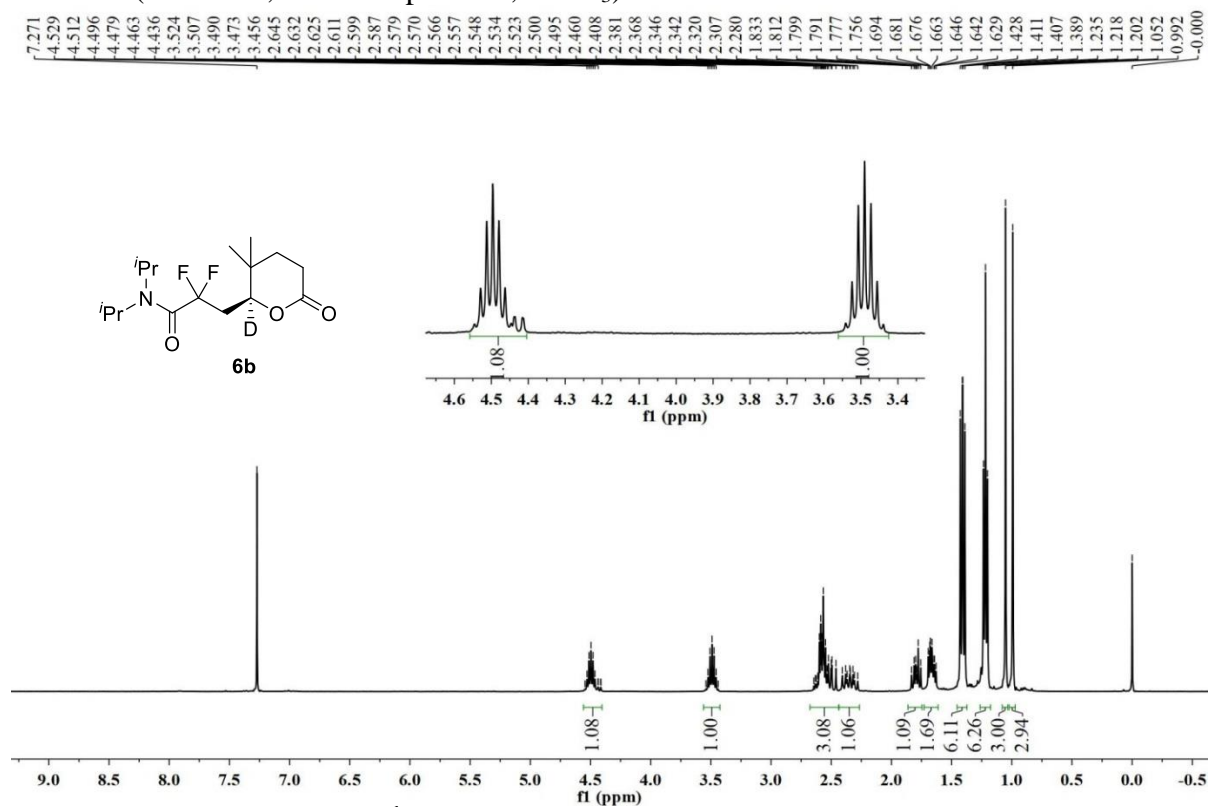

## Supplementary Figure 241. <sup>1</sup>H NMR spectrum of compound 6b

<sup>13</sup>C NMR (100 MHz, room temperature, CDCl<sub>3</sub>)

XMC-4-59-1C.10.fid

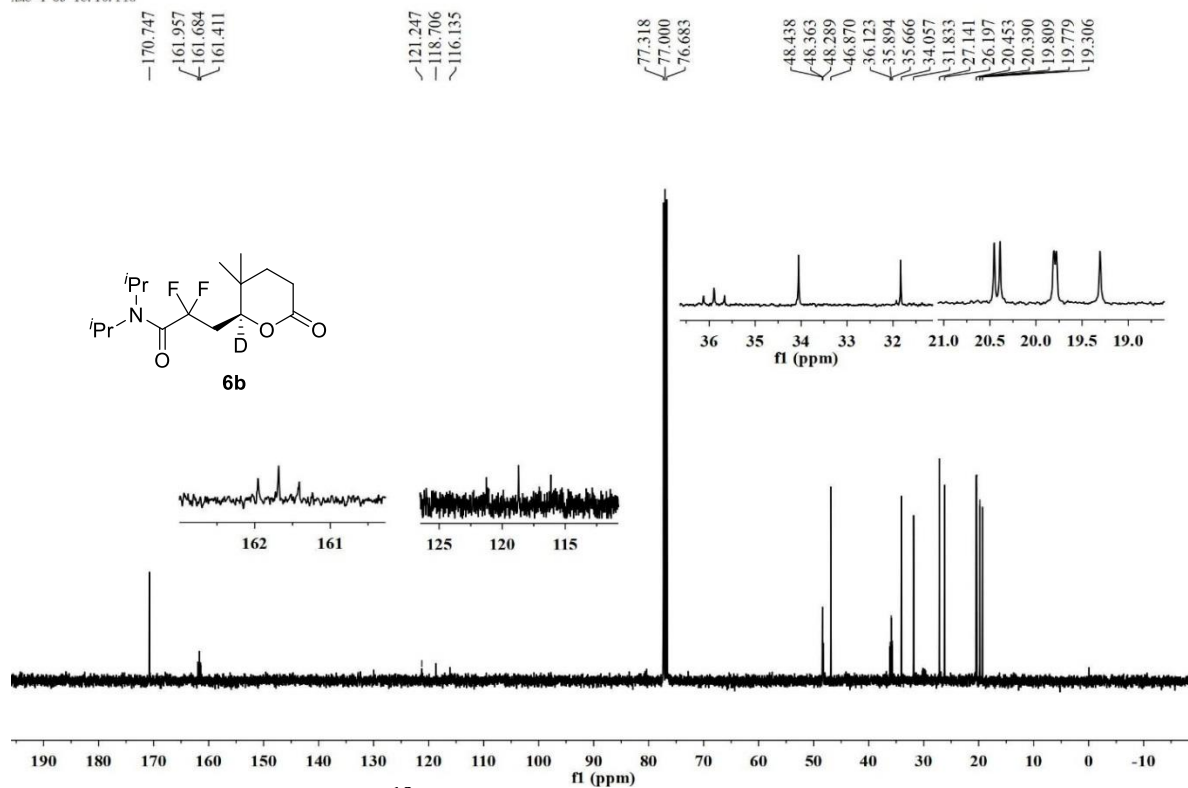

Supplementary Figure 242. <sup>13</sup>C NMR spectrum of compound **6b**

<sup>19</sup>F NMR (376 MHz, room temperature, CDCl<sub>3</sub>)

XMC-4-59-1-bcf.12.fid

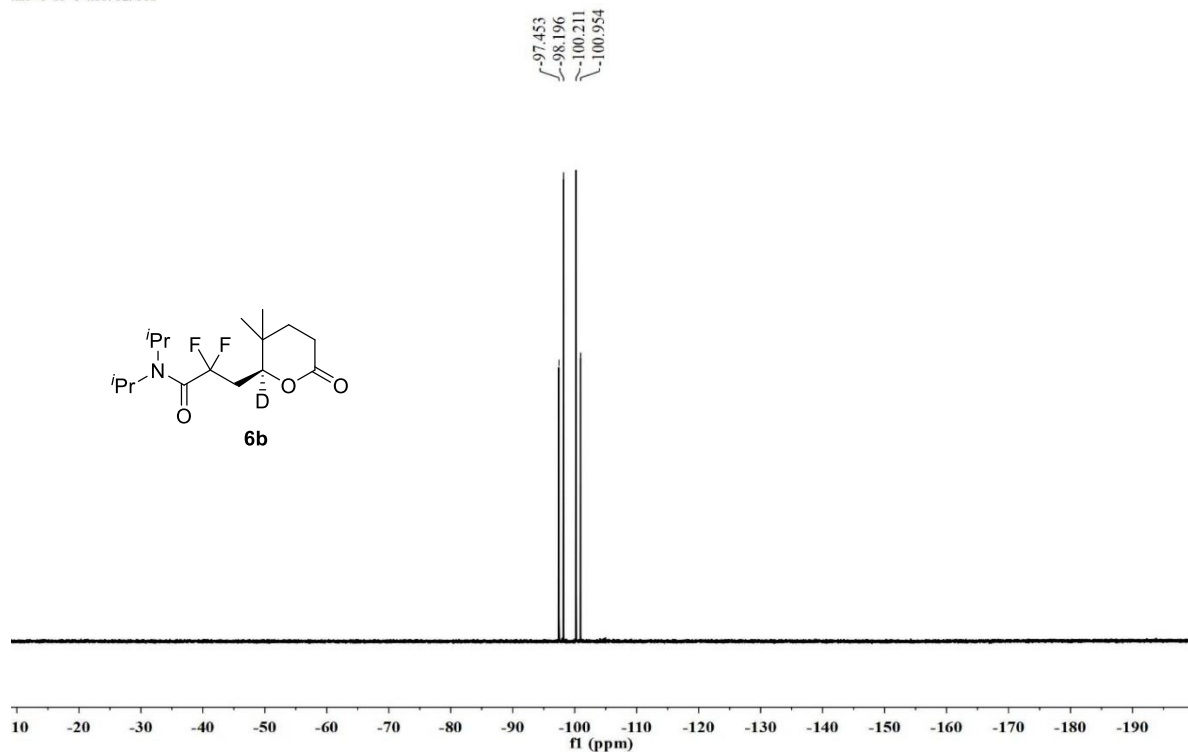

Supplementary Figure 243. <sup>19</sup>F NMR spectrum of compound **6b**



## HPLC spectrum of racemic **6b**

Data File : xmc-2-61a-1-100501.lcd  
Method File : 4OD-H-90-0.5-214.lcm  
Date Processed : 10/5/2021 9:19:44 PM

<Chromatogram View>

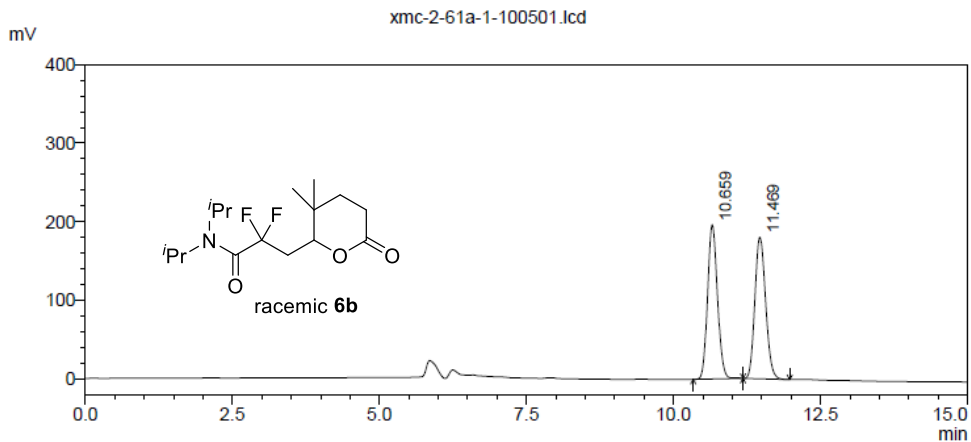

<Data Analysis>

Detector A 214nm

| Peak # | Ret. Time | Height | Area    | Area%   |
|--------|-----------|--------|---------|---------|
| 1      | 10.659    | 196362 | 2303539 | 50.103  |
| 2      | 11.469    | 180255 | 2294061 | 49.897  |
| Total  |           | 376617 | 4597600 | 100.000 |

## Supplementary Figure 244. HPLC spectrum of racemic **6b**

### HPLC spectrum of **6b**

Data File : xmc-4-155-1-1-02.lcd  
Method File : 4OD-H-90-0.5-214.lcm  
Date Processed : 10/19/2021 8:02:22 PM

<Chromatogram View>

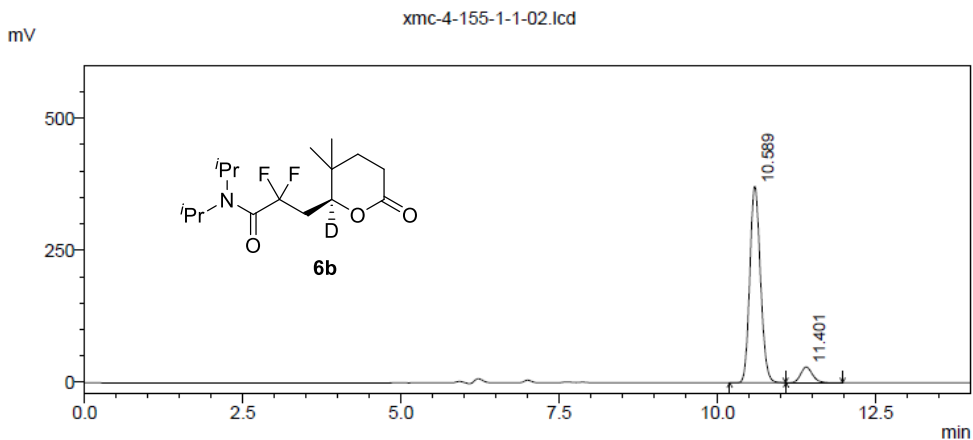

<Data Analysis>

Detector A 214nm

| Peak # | Ret. Time | Height | Area    | Area%   |
|--------|-----------|--------|---------|---------|
| 1      | 10.589    | 371437 | 4358314 | 91.957  |
| 2      | 11.401    | 29545  | 381184  | 8.043   |
| Total  |           | 400981 | 4739499 | 100.000 |

## Supplementary Figure 245. HPLC spectrum of **6b**

$^1\text{H}$  NMR (400 MHz, room temperature,  $\text{CDCl}_3$ )

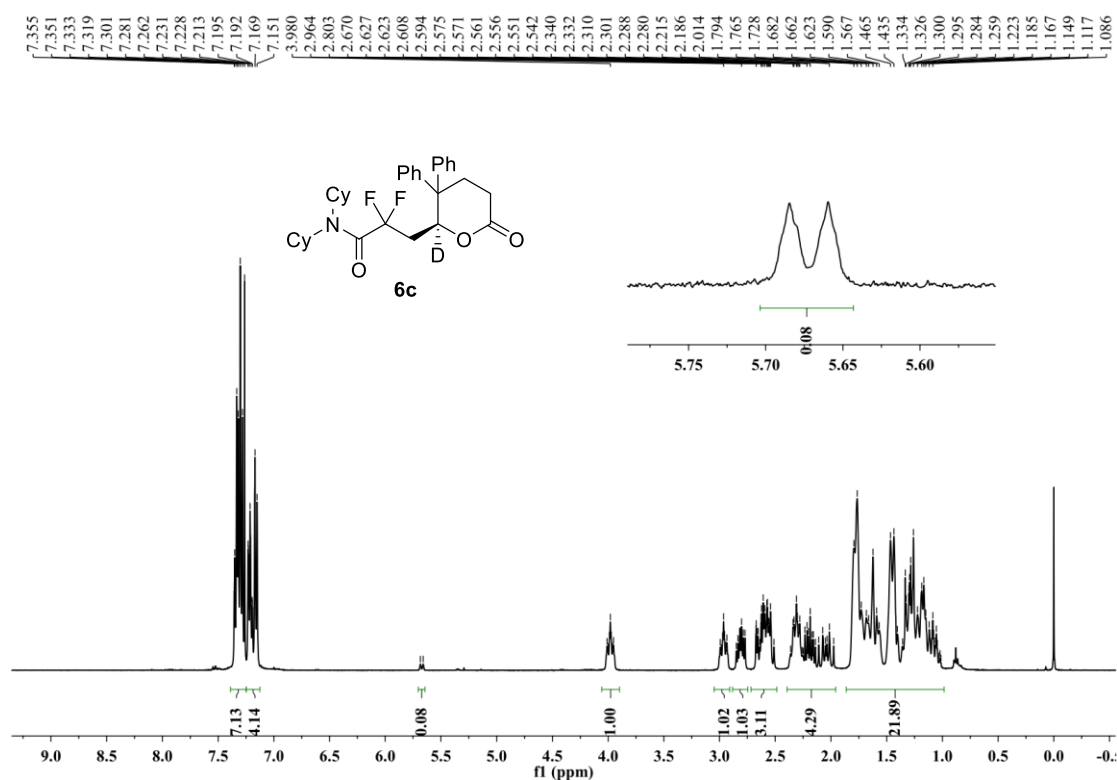

Supplementary Figure 246.  $^1\text{H}$  NMR spectrum of compound **6c**

$^{13}\text{C}$  NMR (100 MHz, room temperature,  $\text{CDCl}_3$ )

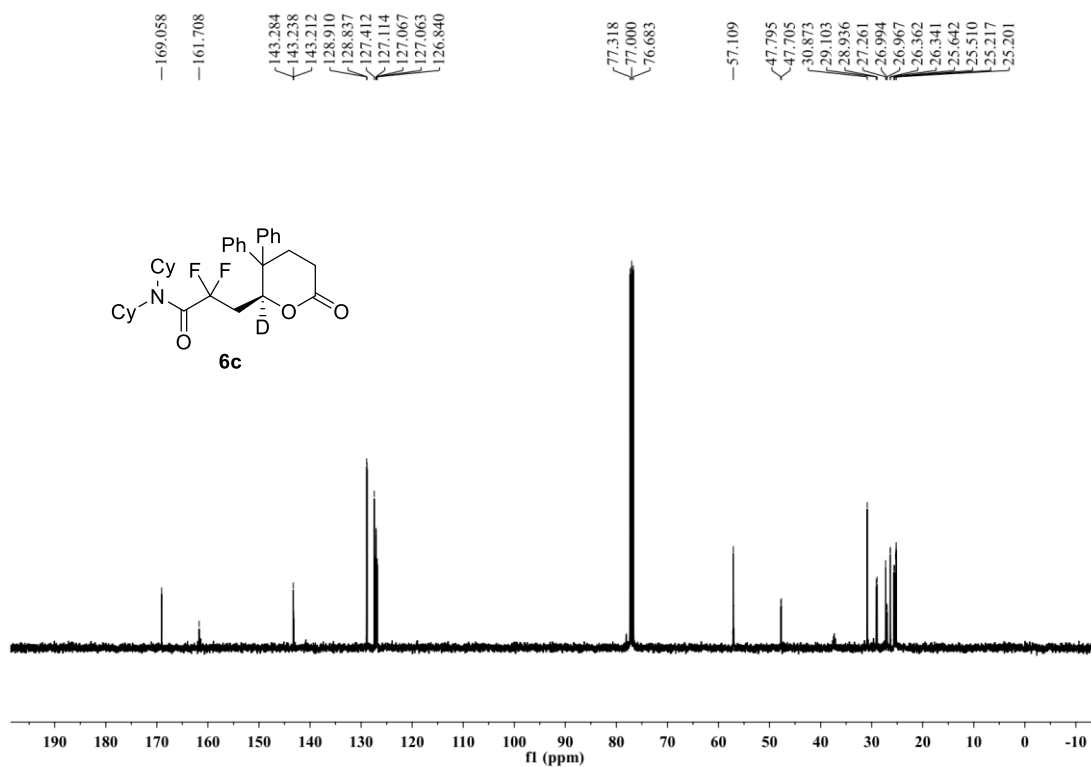

Supplementary Figure 247.  $^{13}\text{C}$  NMR spectrum of compound **6c**

$^{19}\text{F}$  NMR (376 MHz, room temperature,  $\text{CDCl}_3$ )

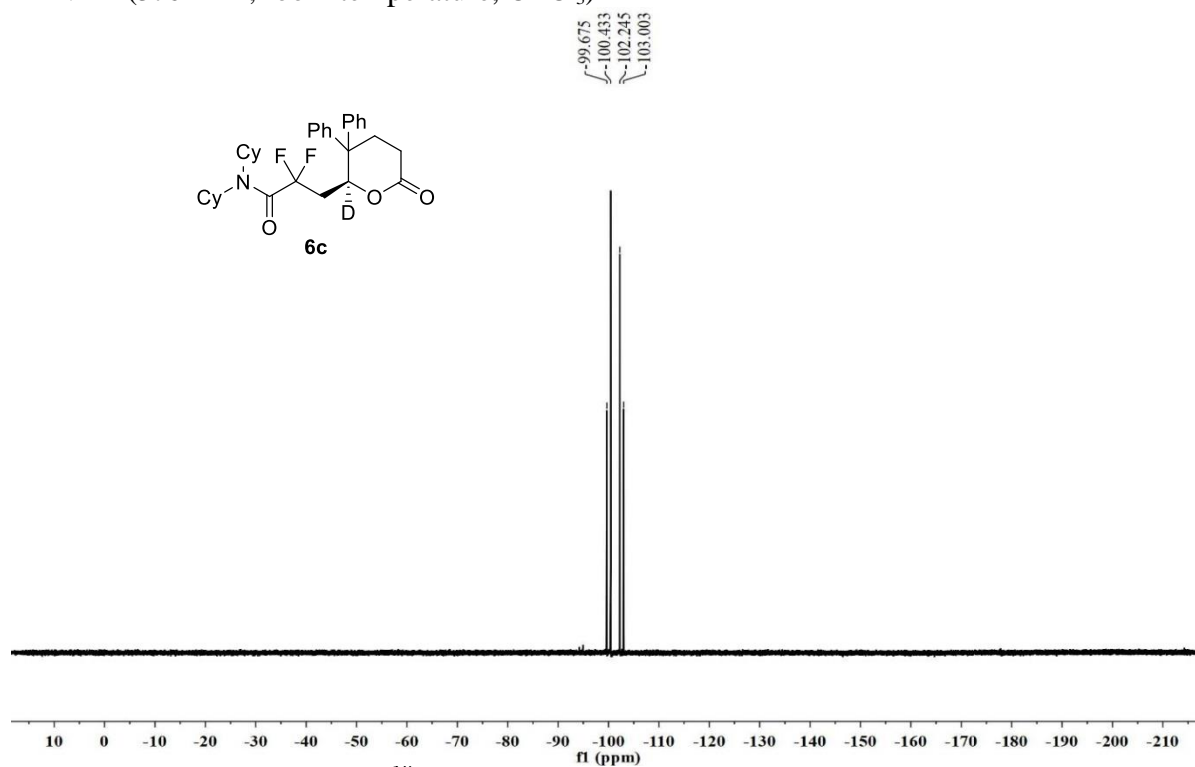

**Supplementary Figure 248.**  $^{19}\text{F}$  NMR spectrum of compound **6c**

HPLC spectrum of racemic **6c**

Data File : xmc-4-22-1-1022.lcd  
Method File : 3AD-H-95-1-214.lcm  
Date Processed : 10/22/2021 6:10:07 PM

<Chromatogram View>

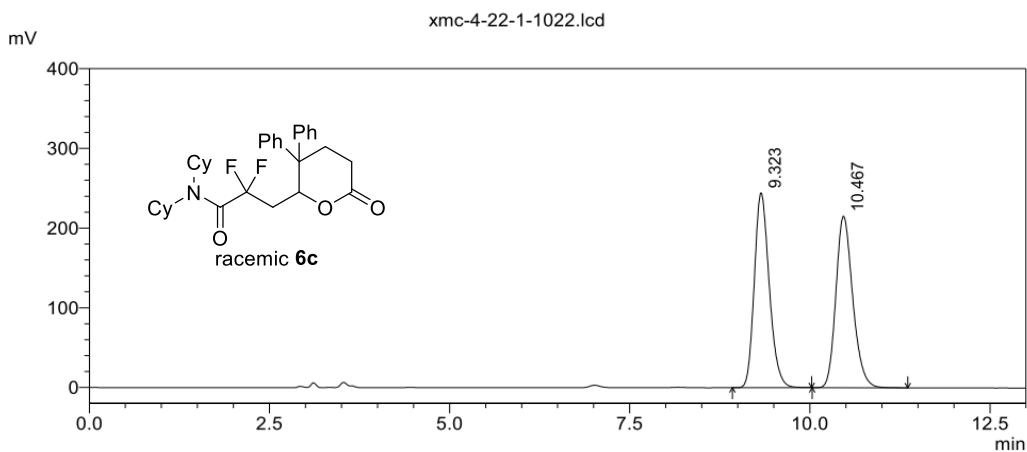

<Data Analysis>

| Detector A 214nm |           |        |         |         |
|------------------|-----------|--------|---------|---------|
| Peak #           | Ret. Time | Height | Area    | Area%   |
| 1                | 9.323     | 244436 | 3521602 | 50.115  |
| 2                | 10.467    | 215063 | 3505400 | 49.885  |
| Total            |           | 459499 | 7027002 | 100.000 |

**Supplementary Figure 249.** HPLC spectrum of racemic **6c**

# HPLC spectrum of 6c

Data File : xmc-4-165-1.lcd  
 Method File : 3AD-H-95-1-214.lcm  
 Date Processed : 10/28/2021 10:49:37 PM

## <Chromatogram View>

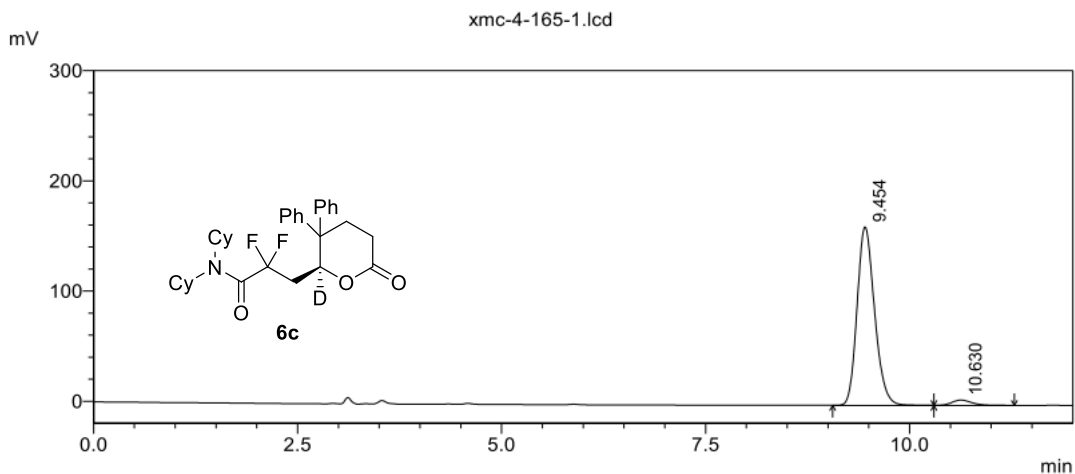

## <Data Analysis>

| Detector A 214nm |           |        |         |         |
|------------------|-----------|--------|---------|---------|
| Pesk #           | Ret. Time | Height | Area    | Area%   |
| 1                | 9.454     | 161779 | 2413366 | 96.706  |
| 2                | 10.630    | 4813   | 82193   | 3.294   |
| Total            |           | 166592 | 2495559 | 100.000 |

# Supplementary Figure 250. HPLC spectrum of 6c

$^1\text{H}$  NMR (400 MHz, room temperature,  $\text{CDCl}_3$ )

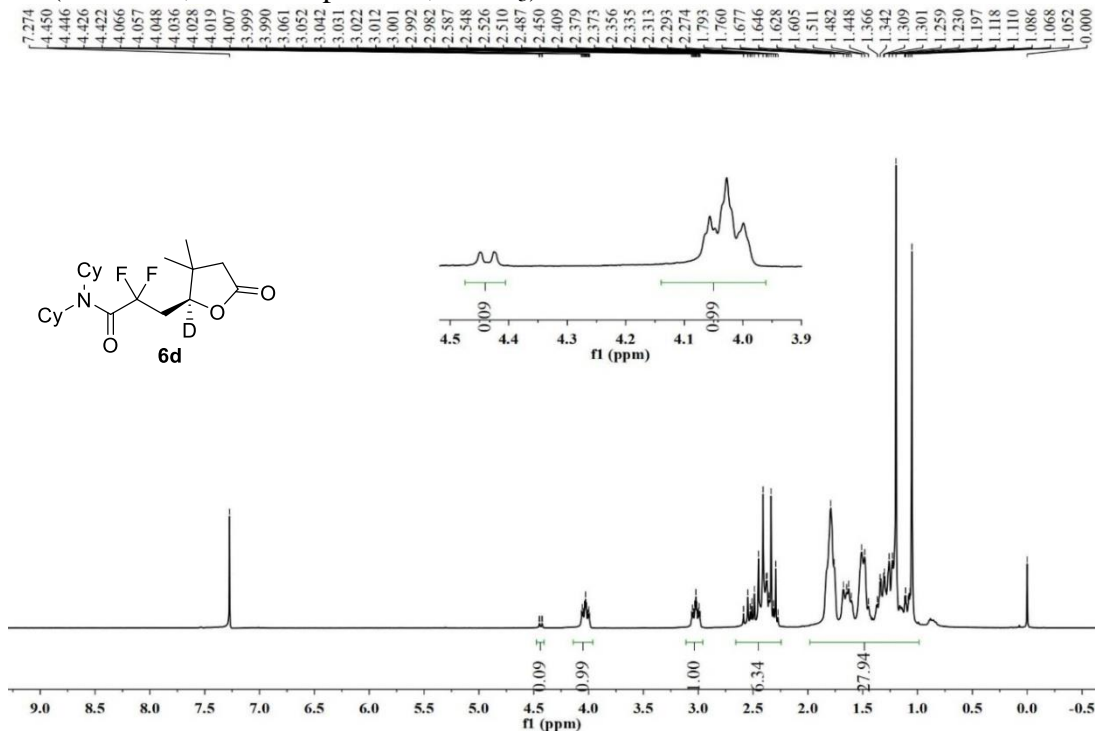

# Supplementary Figure 251. $^1\text{H}$ NMR spectrum of compound 6d

$^{13}\text{C}$  NMR (100 MHz, room temperature,  $\text{CDCl}_3$ )

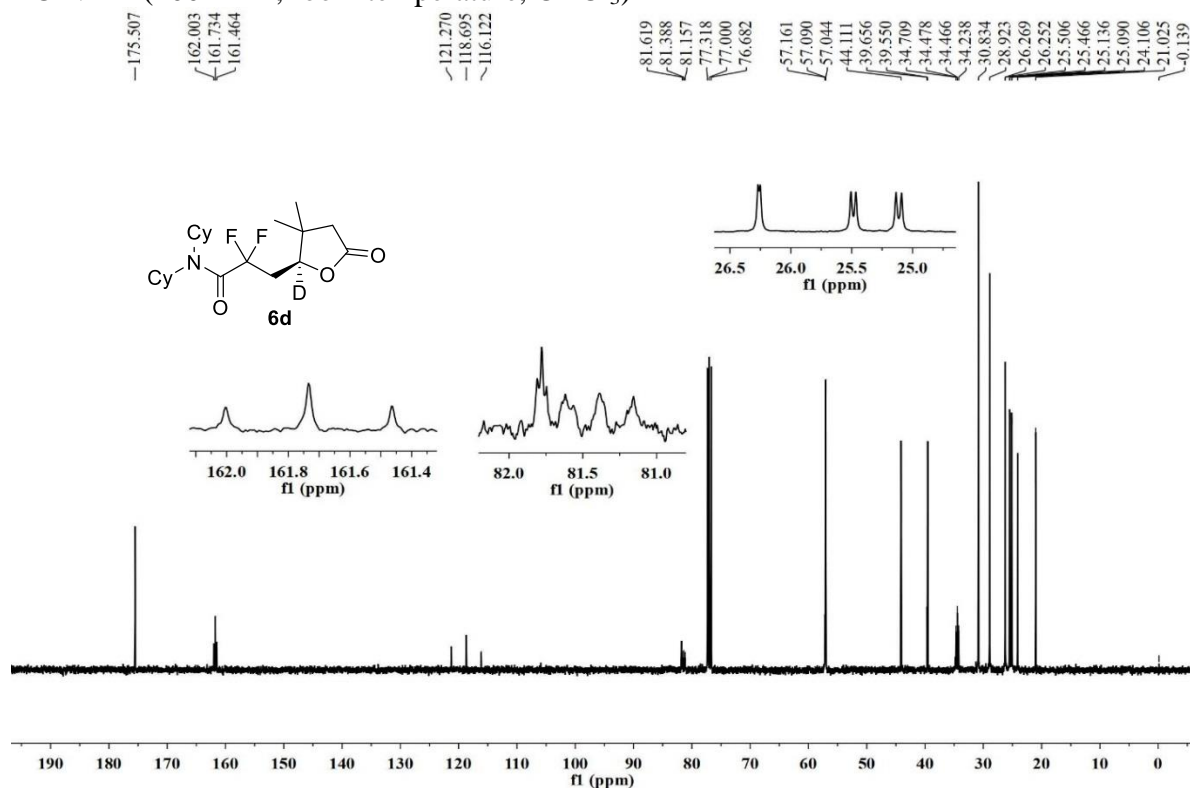

**Supplementary Figure 252.**  $^{13}\text{C}$  NMR spectrum of compound **6d**

$^{19}\text{F}$  NMR (376 MHz, room temperature,  $\text{CDCl}_3$ )

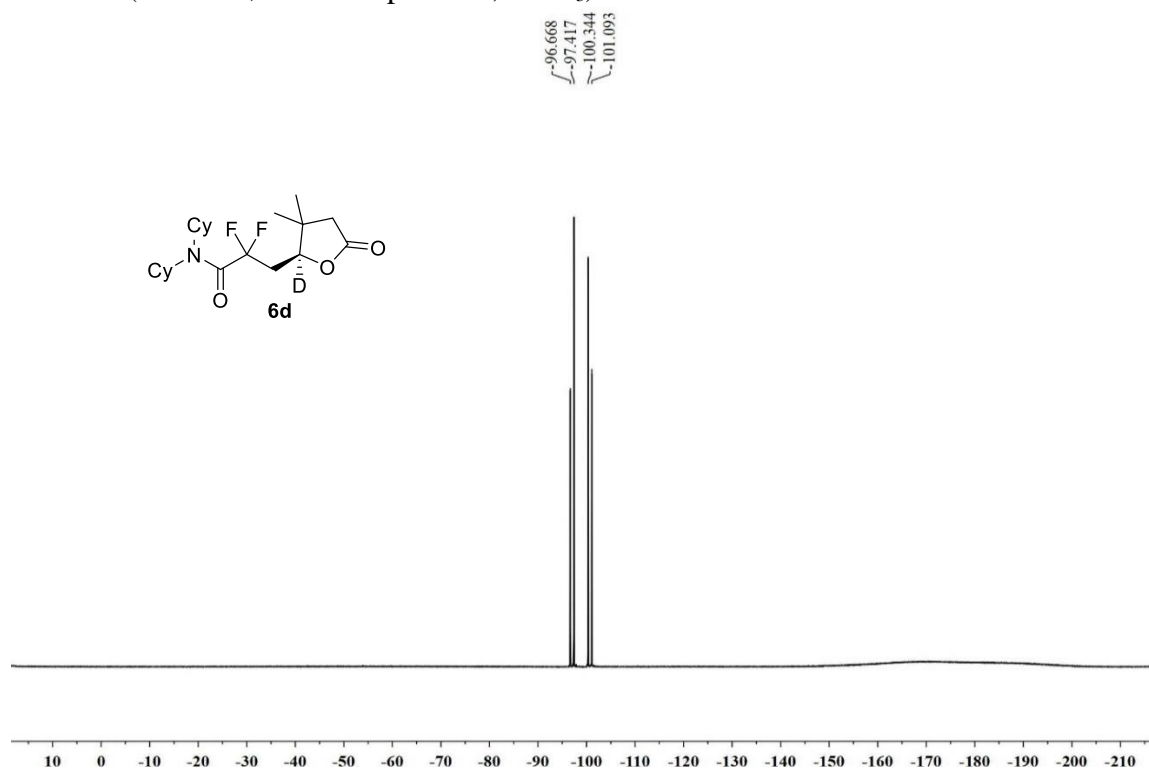

**Supplementary Figure 253.**  $^{19}\text{F}$  NMR spectrum of compound **6d**

### HPLC spectrum of racemic **6d**

Data File : yxy-1-63-01.lcd  
 Method File : 3AD-H-90-0.5-214-30min.lcm  
 Date Processed : 8/5/2021 2:11:20 PM

<Chromatogram View>

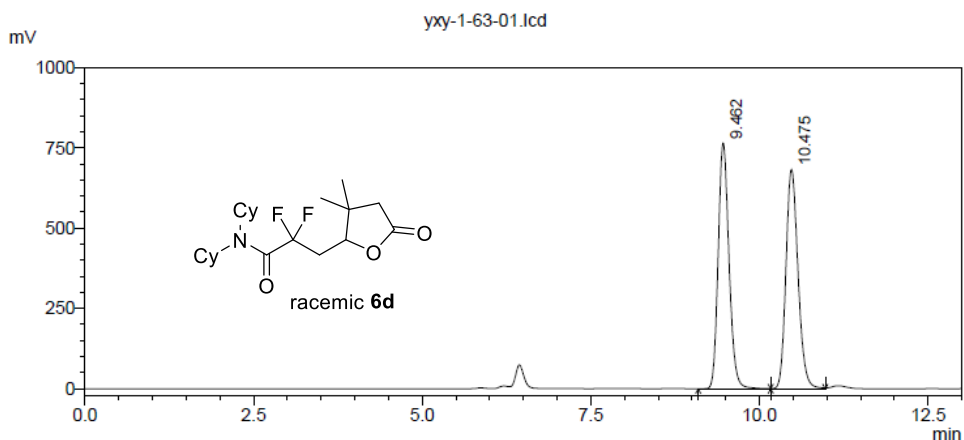

<Data Analysis>

| Detector A 214nm |           |         |          |         |
|------------------|-----------|---------|----------|---------|
| Peak #           | Ret. Time | Height  | Area     | Area%   |
| 1                | 9.462     | 765269  | 8570586  | 50.105  |
| 2                | 10.475    | 683338  | 8534804  | 49.895  |
| Total            |           | 1448607 | 17105391 | 100.000 |

### Supplementary Figure 254. HPLC spectrum of racemic **6d**

#### HPLC spectrum of **6d**

Data File : xmc-2-156-1.lcd  
 Method File : 3AD-H-90-0.5-214.lcm  
 Date Processed : 10/19/2021 2:44:16 PM

<Chromatogram View>

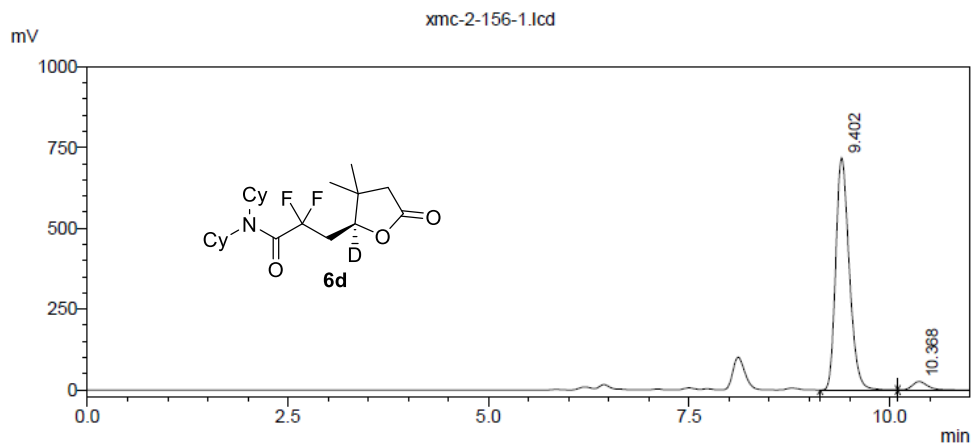

<Data Analysis>

| Detector A 214nm |           |        |         |         |
|------------------|-----------|--------|---------|---------|
| Peak #           | Ret. Time | Height | Area    | Area%   |
| 1                | 9.402     | 718686 | 8447603 | 95.849  |
| 2                | 10.368    | 26516  | 365843  | 4.151   |
| Total            |           | 745202 | 8813445 | 100.000 |

### Supplementary Figure 255. HPLC spectrum of **6d**

$^1\text{H}$  NMR (400 MHz, room temperature,  $\text{CDCl}_3$ )

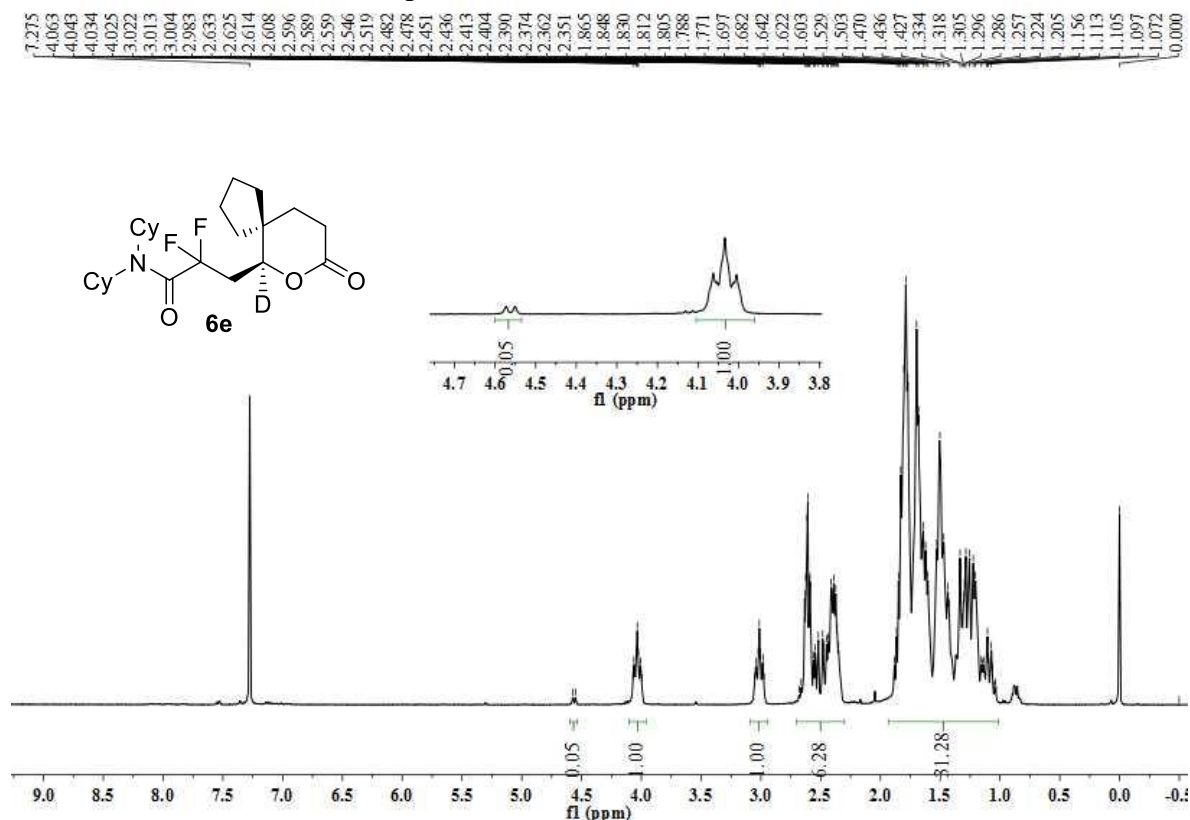

**Supplementary Figure 256.**  $^1\text{H}$  NMR spectrum of compound **6e**

$^{13}\text{C}$  NMR (100 MHz, room temperature,  $\text{CDCl}_3$ )

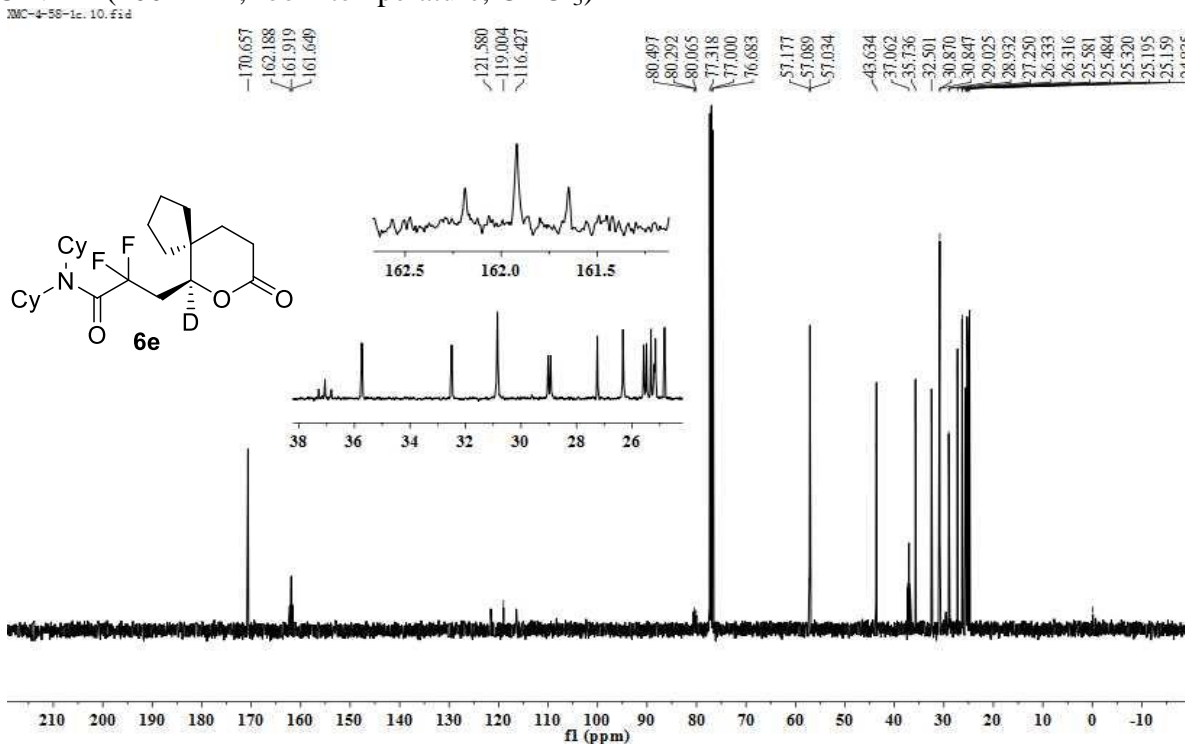

**Supplementary Figure 257.**  $^{13}\text{C}$  NMR spectrum of compound **6e**

$^{19}\text{F}$  NMR (376 MHz, room temperature,  $\text{CDCl}_3$ )

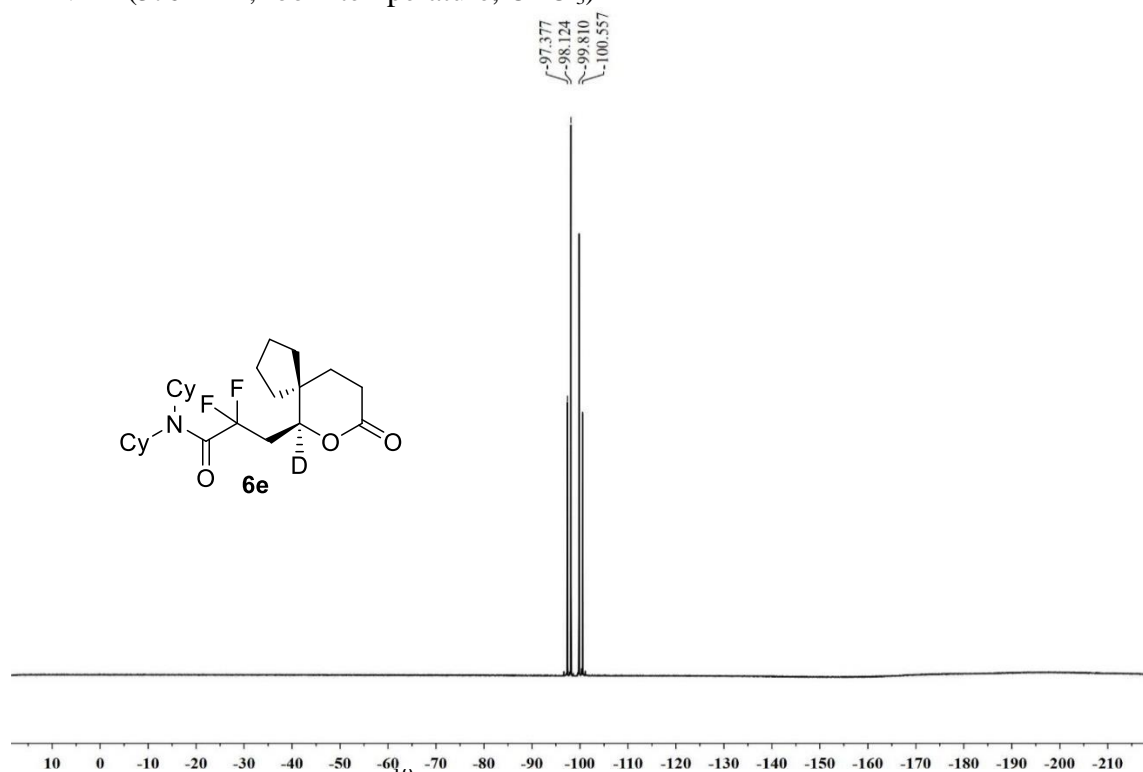

Supplementary Figure 258.  $^{19}\text{F}$  NMR spectrum of compound **6e**

HPLC spectrum of racemic **6e**

Data File : xmc-4-21-2-01.lcd  
Method File : 4OD-H-98-1-214.lcm  
Date Processed : 10/13/2021 6:37:53 PM

<Chromatogram View>

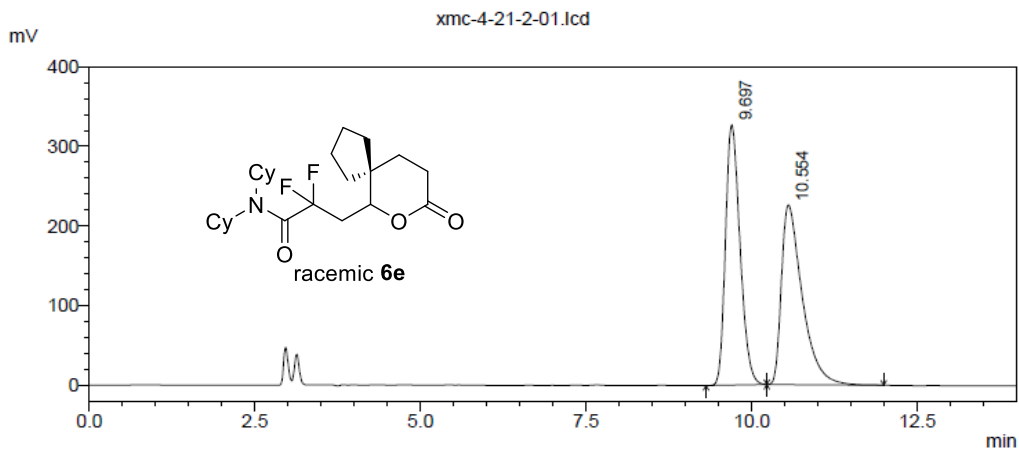

<Data Analysis>

| Detector A 214nm |           |        |         |         |
|------------------|-----------|--------|---------|---------|
| Pesk #           | Ret. Time | Height | Area    | Area%   |
| 1                | 9.697     | 327019 | 5003046 | 50.296  |
| 2                | 10.554    | 225829 | 4944142 | 49.704  |
| Total            |           | 552848 | 9947188 | 100.000 |

Supplementary Figure 259. HPLC spectrum of racemic **6e**



## HPLC spectrum of 6e

Data File : xmc-2-157-1-1.lcd  
 Method File : 4OD-H-98-1-214.lcm  
 Date Processed : 10/18/2021 10:33:06 PM

<Chromatogram View>

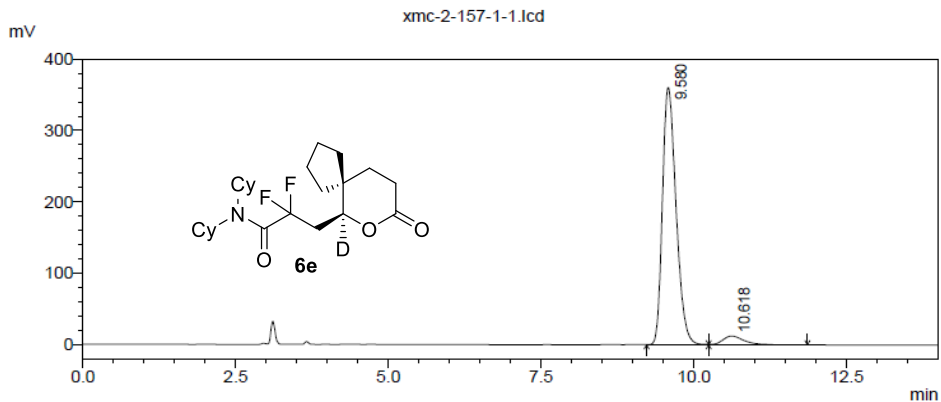

<Data Analysis>

| Detector A 214nm |           |        |         |         |
|------------------|-----------|--------|---------|---------|
| Peak #           | Ret. Time | Height | Area    | Area%   |
| 1                | 9.580     | 360802 | 5613616 | 94.834  |
| 2                | 10.618    | 12443  | 305780  | 5.166   |
| Total            |           | 373245 | 5919395 | 100.000 |

## Supplementary Figure 260. HPLC spectrum of 6e

<sup>1</sup>H NMR (400 MHz, room temperature, CDCl<sub>3</sub>)

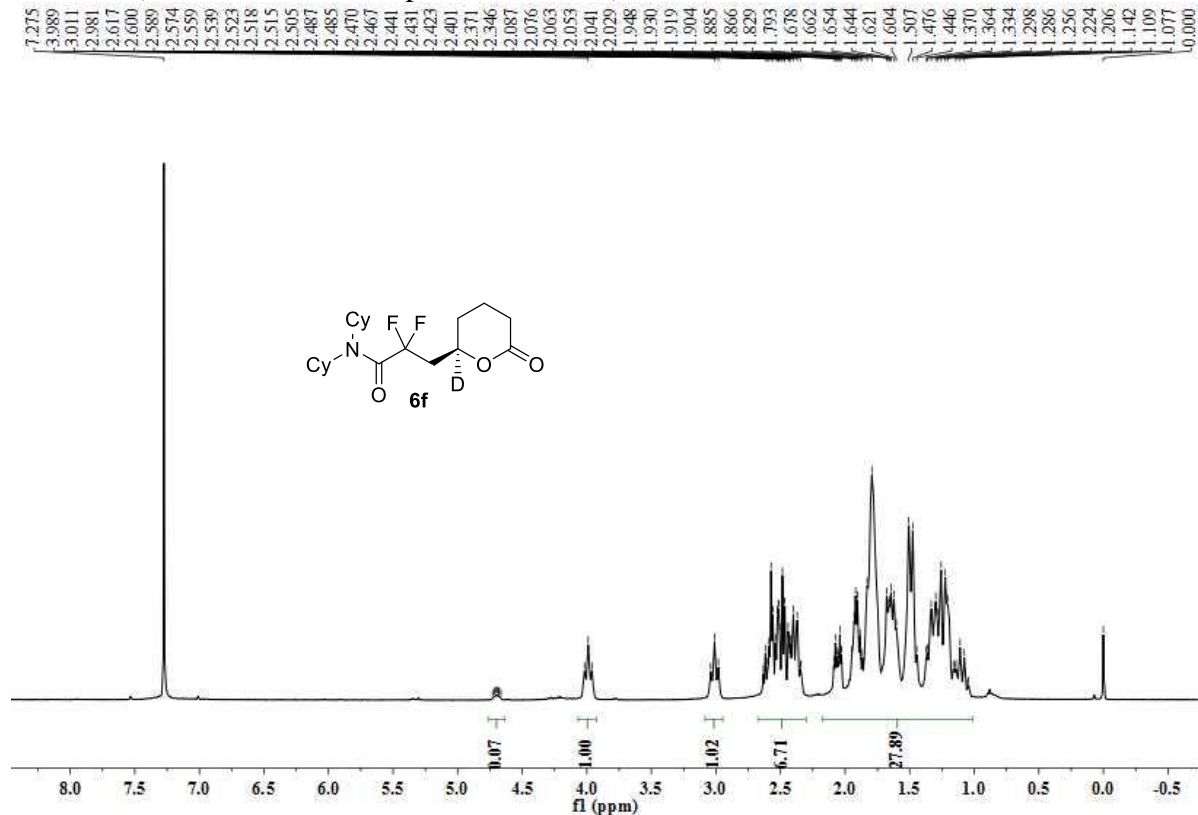

## Supplementary Figure 261. <sup>1</sup>H NMR spectrum of compound 6f

$^{13}\text{C}$  NMR (100 MHz, room temperature,  $\text{CDCl}_3$ )

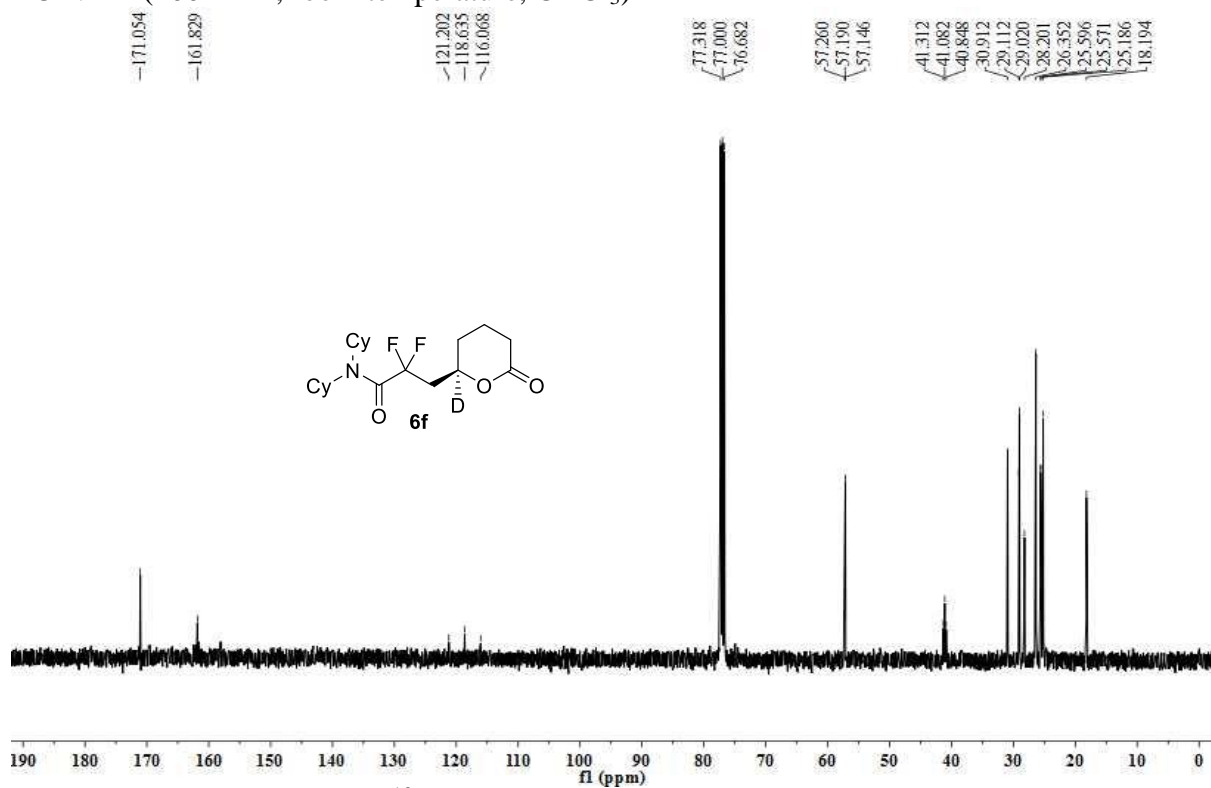

Supplementary Figure 262.  $^{13}\text{C}$  NMR spectrum of compound **6f**

$^{19}\text{F}$  NMR (376 MHz, room temperature,  $\text{CDCl}_3$ )

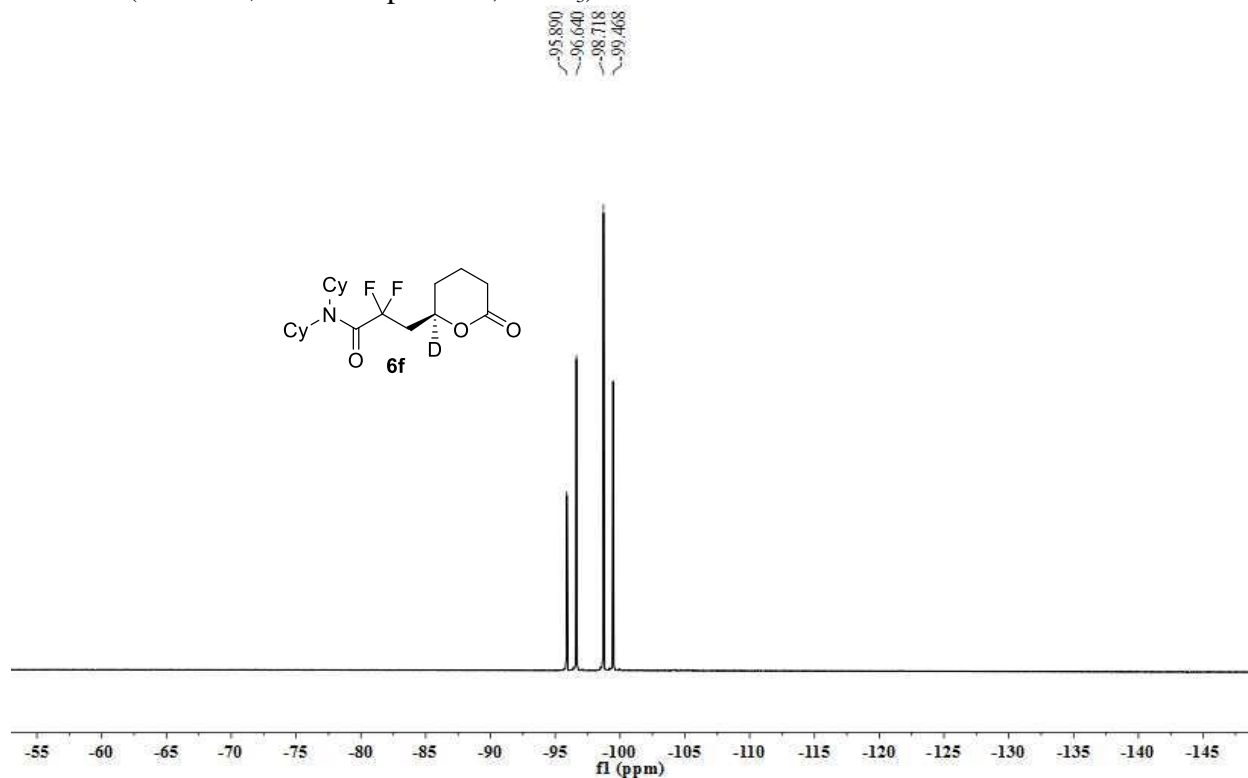

Supplementary Figure 263.  $^{19}\text{F}$  NMR spectrum of compound **6f**

### HPLC spectrum of racemic **6f**

Method File : 10J-H-99.7-0.5-214.lcm  
 Date Acquired : 6/14/2022 10:52:02 PM  
 Date Processed : 6/15/2022 9:23:53 AM

<Chromatogram View>

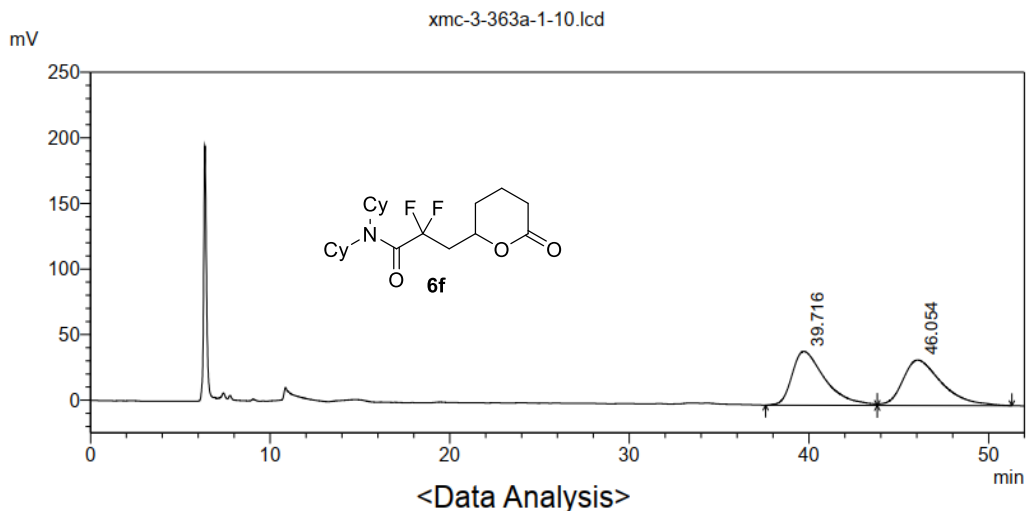

<Data Analysis>

Detector A 214nm

| Peak # | Ret. Time | Height | Area     | Area%   |
|--------|-----------|--------|----------|---------|
| 1      | 39.716    | 41022  | 5214671  | 50.094  |
| 2      | 46.054    | 34604  | 5195173  | 49.906  |
| Total  |           | 75626  | 10409845 | 100.000 |

### Supplementary Figure 264. HPLC spectrum of racemic **6f**

#### HPLC spectrum of **6f**

Method File : 10J-H-99.7-0.5-214.lcm  
 Date Acquired : 6/14/2022 11:53:08 PM  
 Date Processed : 6/15/2022 9:26:27 AM

<Chromatogram View>

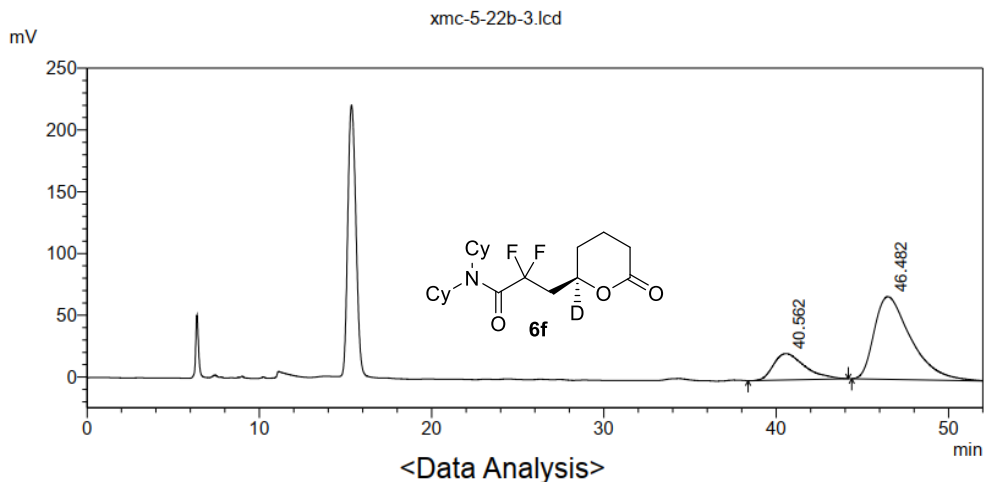

<Data Analysis>

Detector A 214nm

| Peak # | Ret. Time | Height | Area     | Area%   |
|--------|-----------|--------|----------|---------|
| 1      | 40.562    | 21286  | 2689205  | 21.397  |
| 2      | 46.482    | 66929  | 9878909  | 78.603  |
| Total  |           | 88214  | 12568114 | 100.000 |

### Supplementary Figure 265. HPLC spectrum of **6f**

$^1\text{H}$  NMR (400 MHz, room temperature,  $\text{CDCl}_3$ )

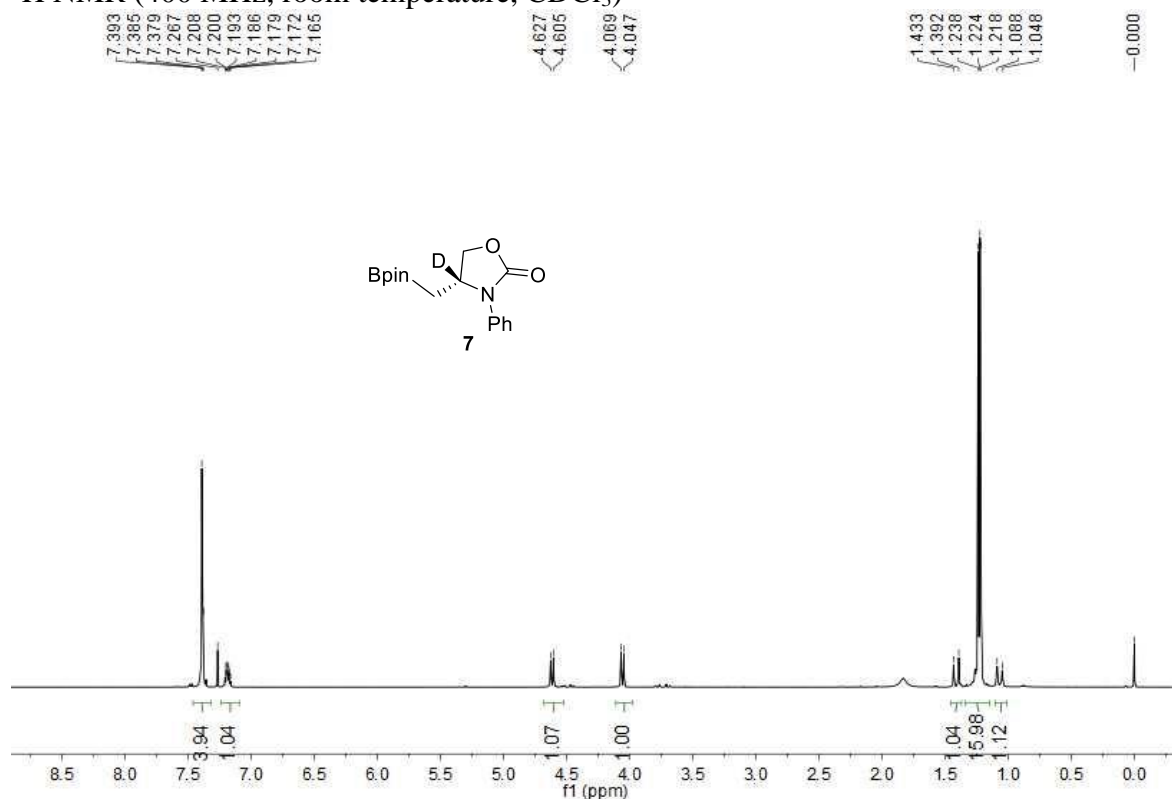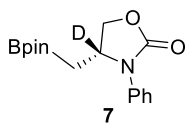

Supplementary Figure 266.  $^1\text{H}$  NMR spectrum of compound 7

$^{13}\text{C}$  NMR (100 MHz, room temperature,  $\text{CDCl}_3$ )

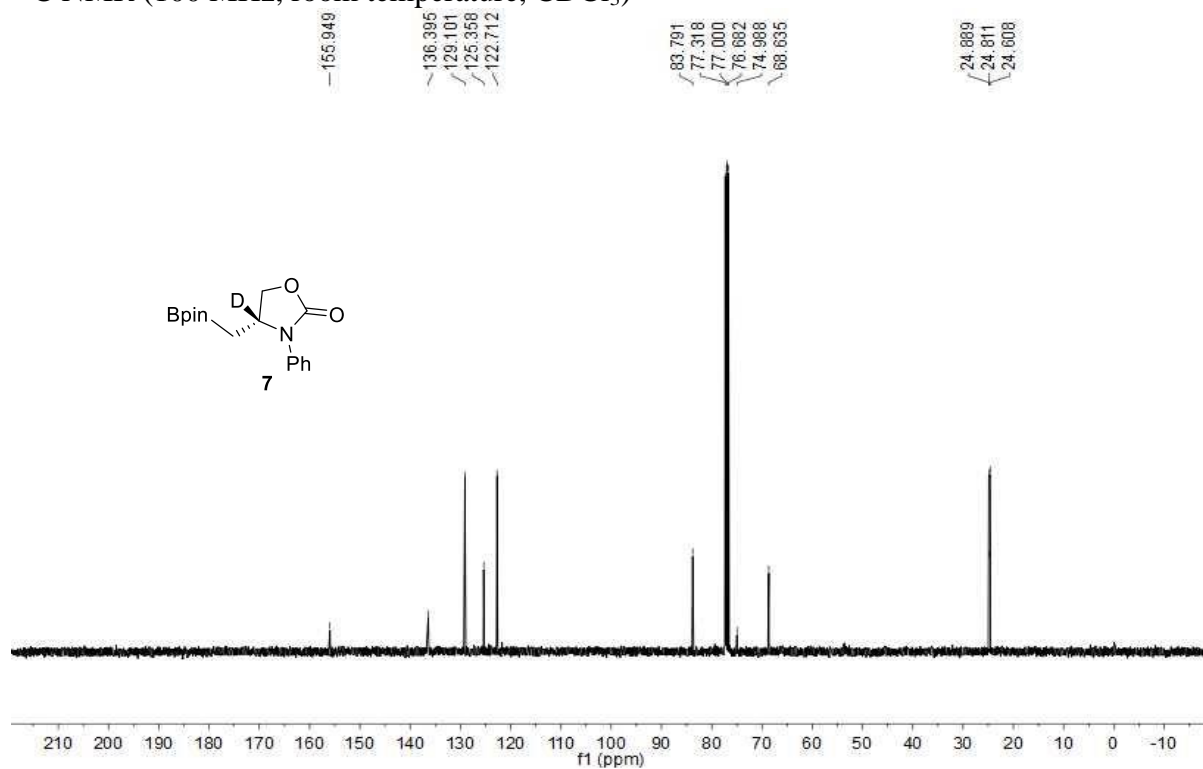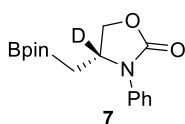

Supplementary Figure 267.  $^{13}\text{C}$  NMR spectrum of compound 7

$^{11}\text{B}$  NMR (128 MHz, room temperature,  $\text{CDCl}_3$ )

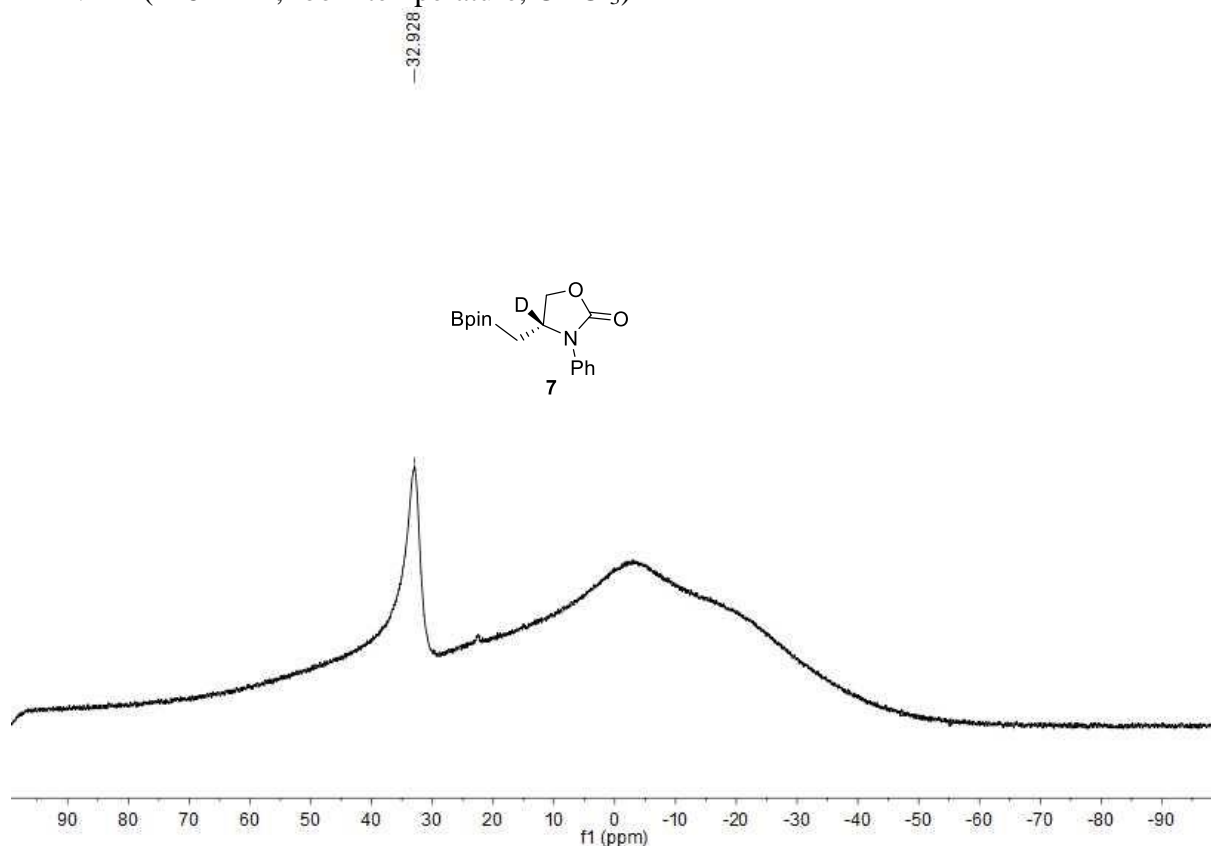

**Supplementary Figure 268.**  $^{11}\text{B}$  NMR spectrum of compound **7**

HPLC spectrum of racemic **7**

Vial# : 1  
Data File : sql-7-31-1-(Y3).lcd  
Method File : 4OD-H-80-0.5-214.lcm  
Date Acquired : 1/22/2022 7:06:47 PM  
Date Processed : 1/25/2022 1:39:01 AM

<Chromatogram View>

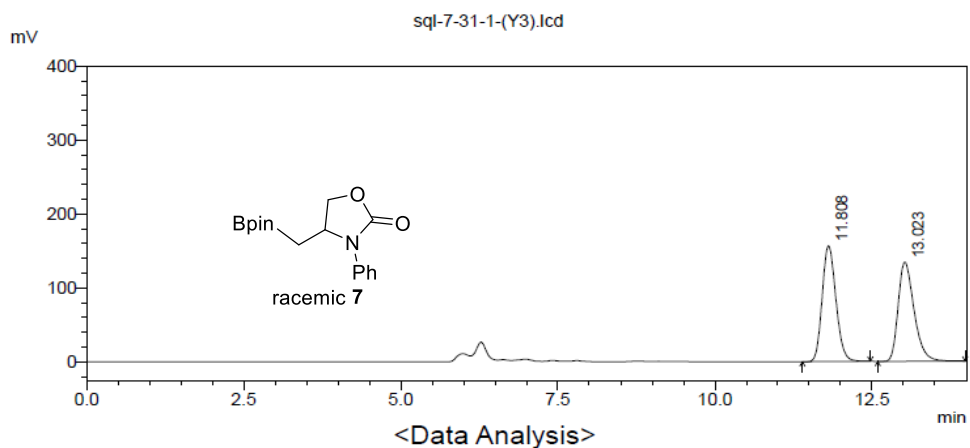

| Detector A 214nm |           |        |         |         |
|------------------|-----------|--------|---------|---------|
| Pesck #          | Ret. Time | Height | Area    | Area%   |
| 1                | 11.808    | 156678 | 2386602 | 50.272  |
| 2                | 13.023    | 134074 | 2360734 | 49.728  |
| Total            |           | 290752 | 4747336 | 100.000 |

**Supplementary Figure 269.** HPLC spectrum of racemic **7**

## HPLC spectrum of 7

Tray# : 1  
 Vial# : 2  
 Data File : xxy-2-231-1-(Y3).lcd  
 Method File : 4OD-H-80-0.5-214.lcm  
 Date Acquired : 1/22/2022 10:24:22 PM  
 Date Processed : 1/25/2022 1:38:21 AM

<Chromatogram View>

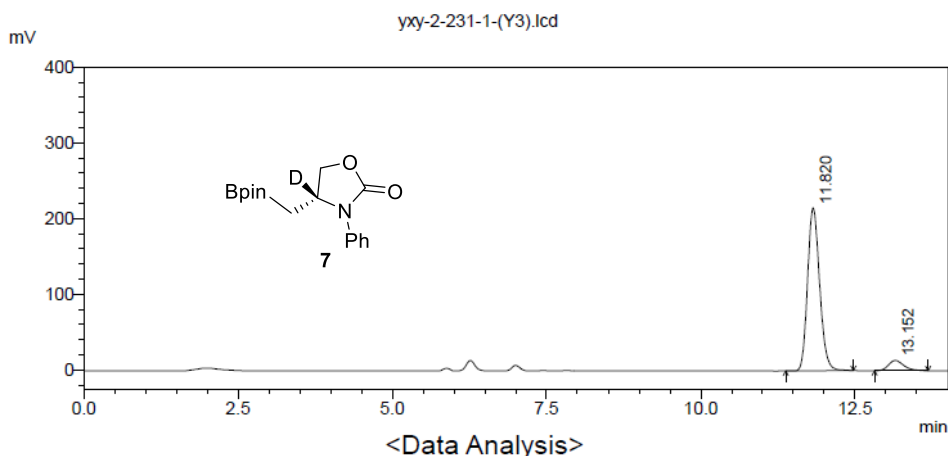

| Detector A 214nm |           |        |         |         |
|------------------|-----------|--------|---------|---------|
| Peak #           | Ret. Time | Height | Area    | Area%   |
| 1                | 11.820    | 215099 | 2925709 | 92.531  |
| 2                | 13.152    | 13567  | 236153  | 7.469   |
| Total            |           | 228666 | 3161863 | 100.000 |

## Supplementary Figure 270. HPLC spectrum of 7

$^1\text{H}$  NMR (400 MHz, room temperature,  $\text{CDCl}_3$ )

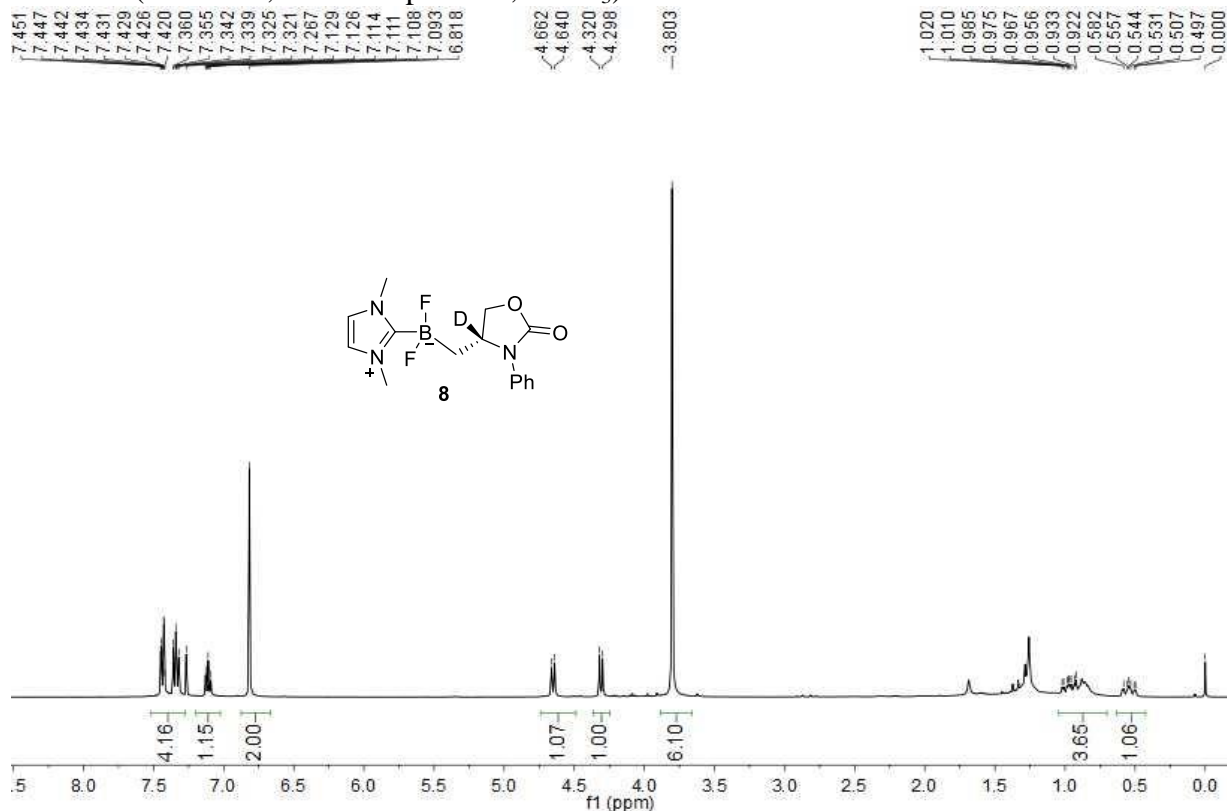

## Supplementary Figure 271. $^1\text{H}$ NMR spectrum of compound 8

$^{13}\text{C}$  NMR (100 MHz, room temperature,  $\text{CDCl}_3$ )

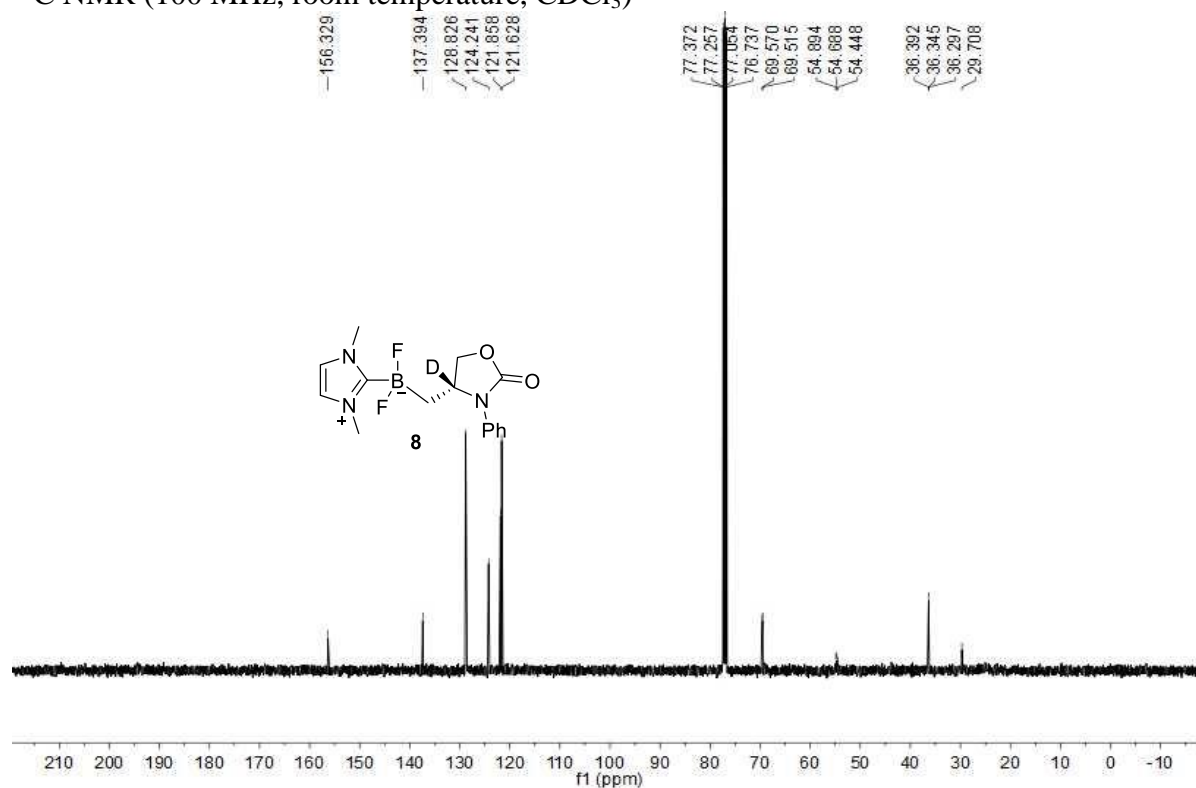

**Supplementary Figure 272.**  $^{13}\text{C}$  NMR spectrum of compound **8**

$^{11}\text{B}$  NMR (128 MHz, room temperature,  $\text{CDCl}_3$ )

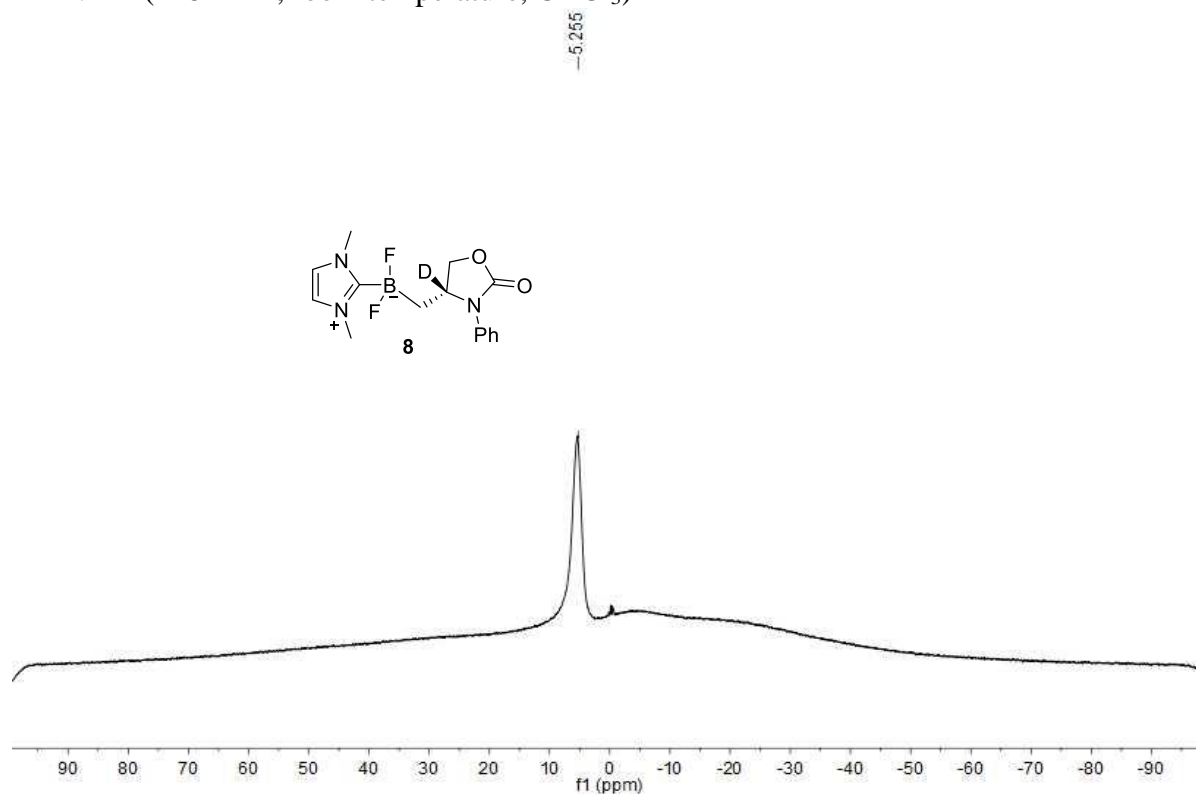

**Supplementary Figure 273.**  $^{11}\text{B}$  NMR spectrum of compound **8**

$^{19}\text{F}$  NMR (376 MHz, room temperature,  $\text{CDCl}_3$ )

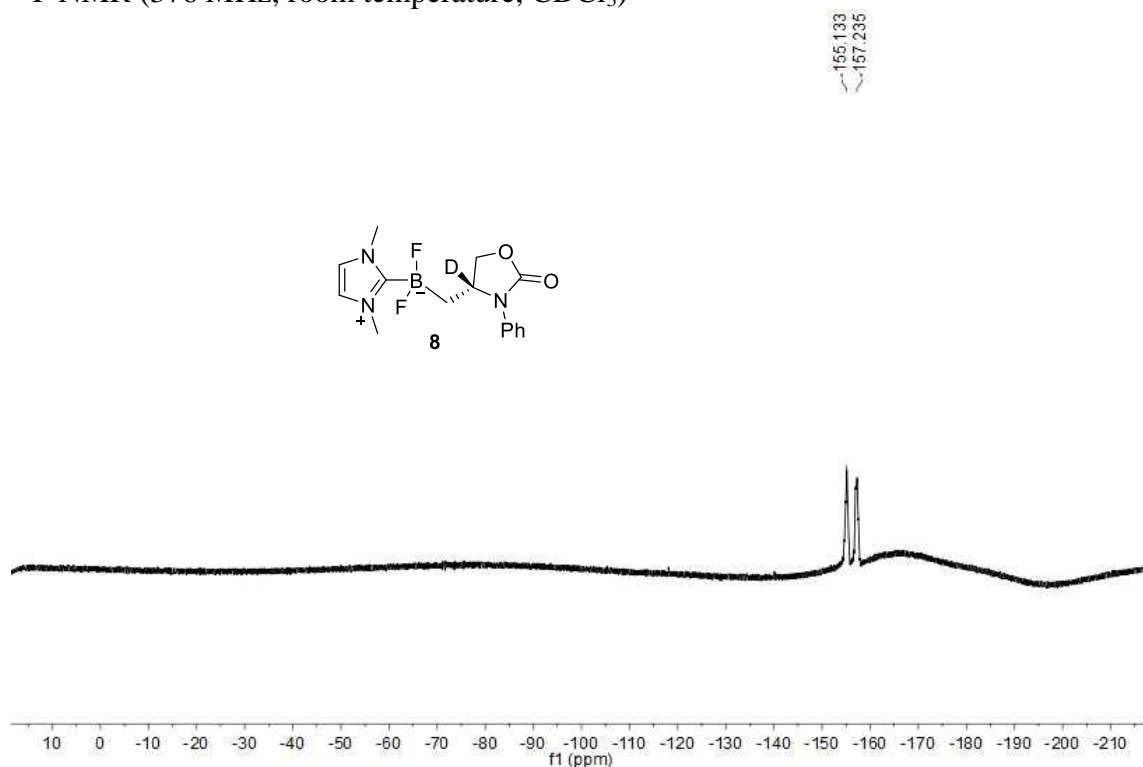

**Supplementary Figure 274.**  $^{19}\text{F}$  NMR spectrum of compound **8**

HPLC spectrum of racemic **8**

Tray# : 1  
Vial# : 2  
Data File : sql-7-25-2.lcd  
Method File : 40D-H-65-0.5-214.lcm  
Date Acquired : 2/1/2022 12:33:38 PM  
Date Processed : 2/1/2022 1:23:11 PM

<Chromatogram View>

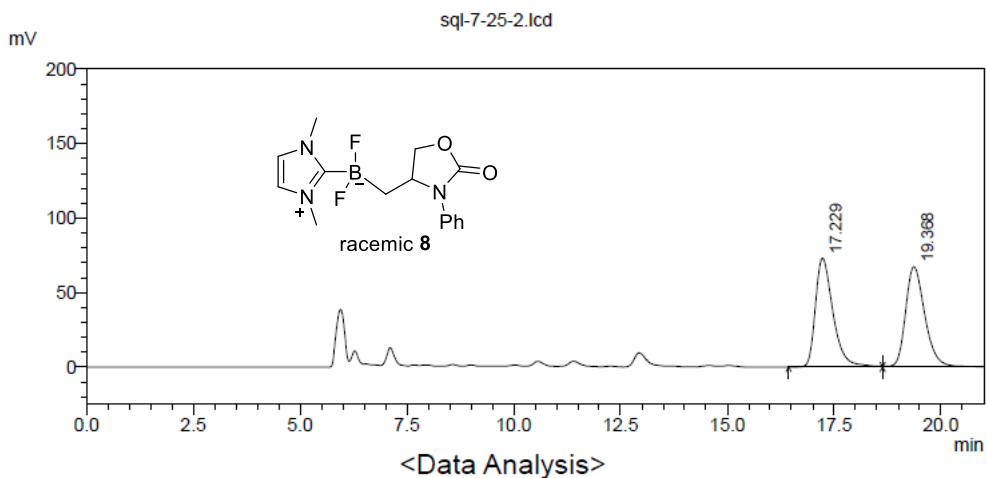

Detector A 214nm

| Peak # | Ret. Time | Height | Area    | Area%   |
|--------|-----------|--------|---------|---------|
| 1      | 17.229    | 73056  | 2103698 | 49.721  |
| 2      | 19.368    | 67394  | 2127346 | 50.279  |
| Total  |           | 140450 | 4231044 | 100.000 |

**Supplementary Figure 275.** HPLC spectrum of racemic **8**



### HPLC spectrum of **8**

Data File : sql-7-26-5.lcd  
 Method File : 40D-H-65-0.5-214.lcm  
 Date Acquired : 2/1/2022 12:07:32 PM  
 Date Processed : 2/1/2022 1:23:19 PM

<Chromatogram View>

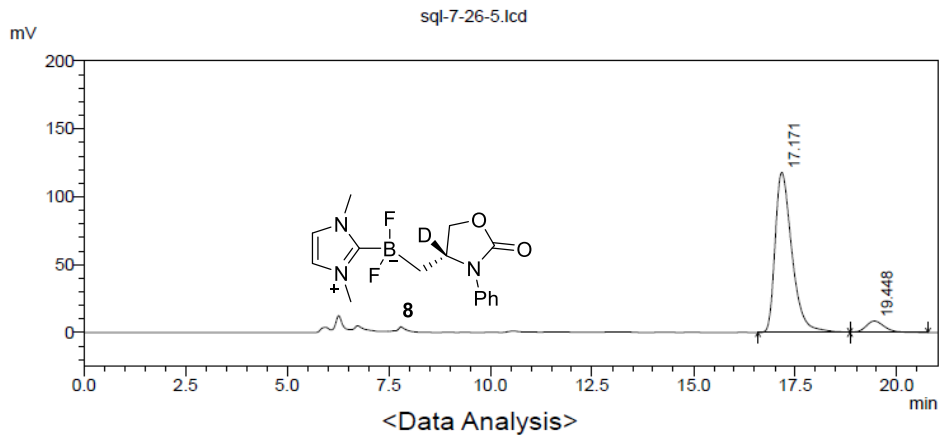

| Peak # | Ret. Time | Height | Area    | Area%   |
|--------|-----------|--------|---------|---------|
| 1      | 17.171    | 117946 | 3407301 | 92.781  |
| 2      | 19.448    | 8375   | 265130  | 7.219   |
| Total  |           | 126321 | 3672431 | 100.000 |

### Supplementary Figure 276. HPLC spectrum of **8**

<sup>1</sup>H NMR (400 MHz, room temperature, CDCl<sub>3</sub>)

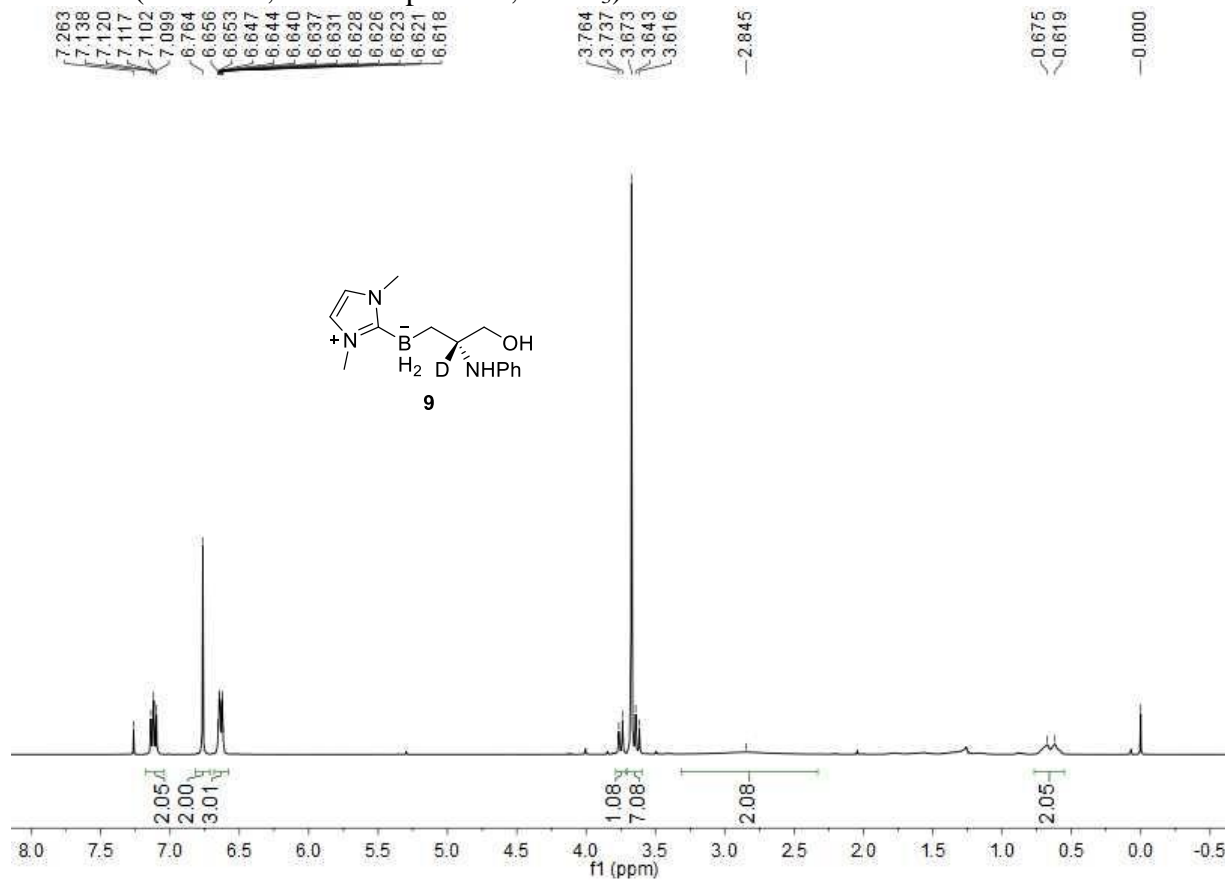

### Supplementary Figure 277. <sup>1</sup>H NMR spectrum of compound **9**

$^{13}\text{C}$  NMR (100 MHz, room temperature,  $\text{CDCl}_3$ )

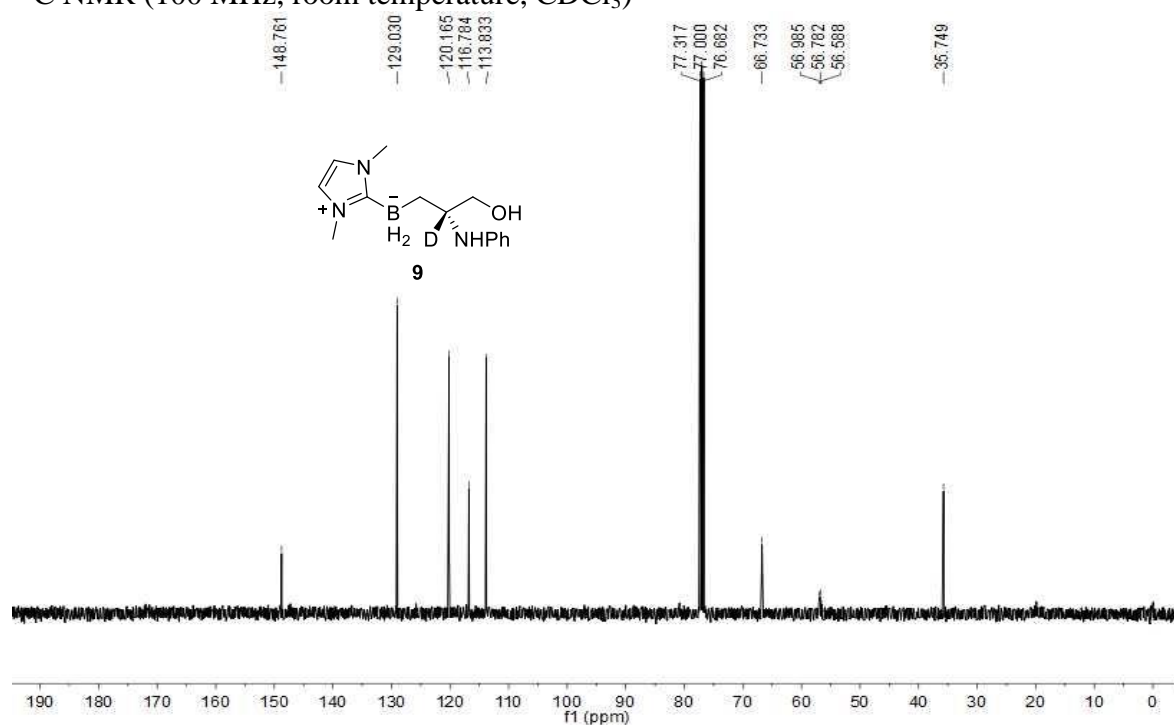

**Supplementary Figure 278.**  $^{13}\text{C}$  NMR spectrum of compound **9**

$^{11}\text{B}$  NMR (128 MHz, room temperature,  $\text{CDCl}_3$ )

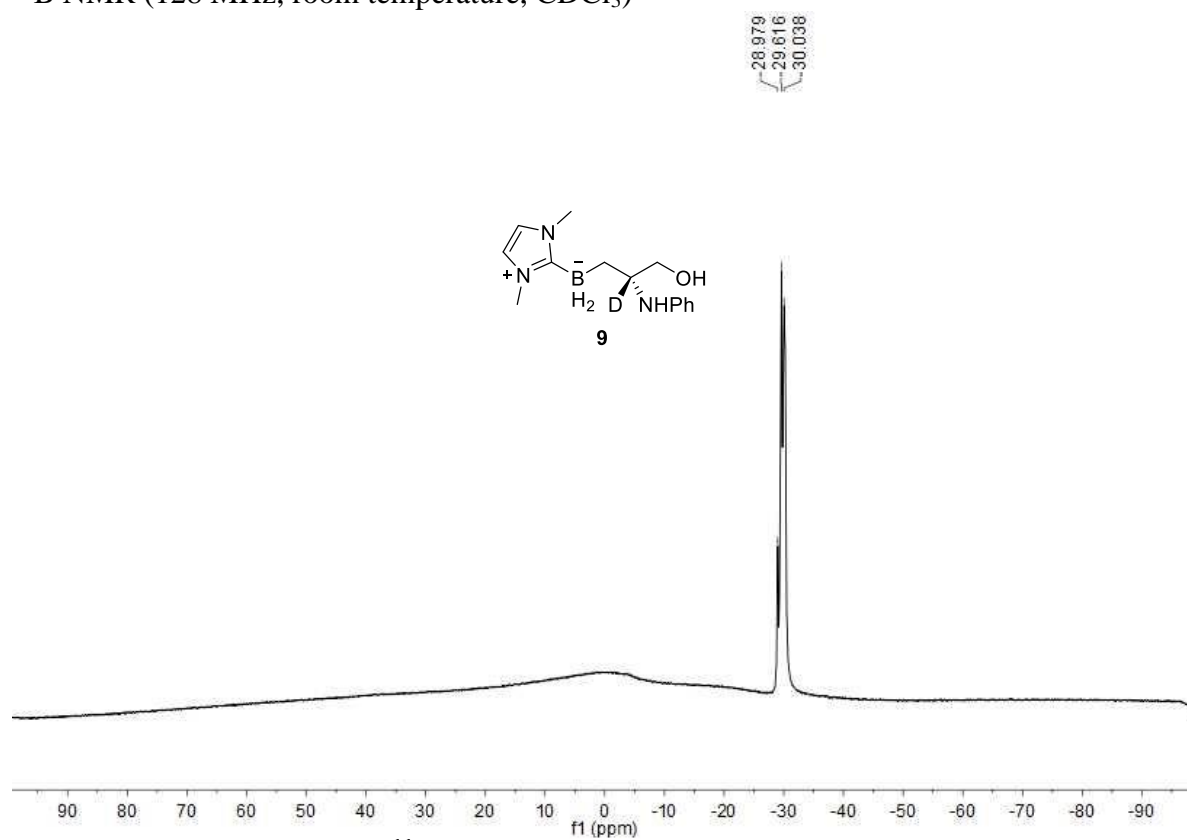

**Supplementary Figure 279.**  $^{11}\text{B}$  NMR spectrum of compound **9**

### HPLC spectrum of racemic **9**

Sample Name :  
 Tray# : 1  
 Vial# : 32  
 Data File : SQL-7-27-8-(Y2).lcd  
 Method File : 4OD-H-90-0.5-214-40min.lcm  
 Date Acquired : 1/22/2022 12:23:53 AM  
 Date Processed : 1/25/2022 1:36:17 AM

<Chromatogram View>

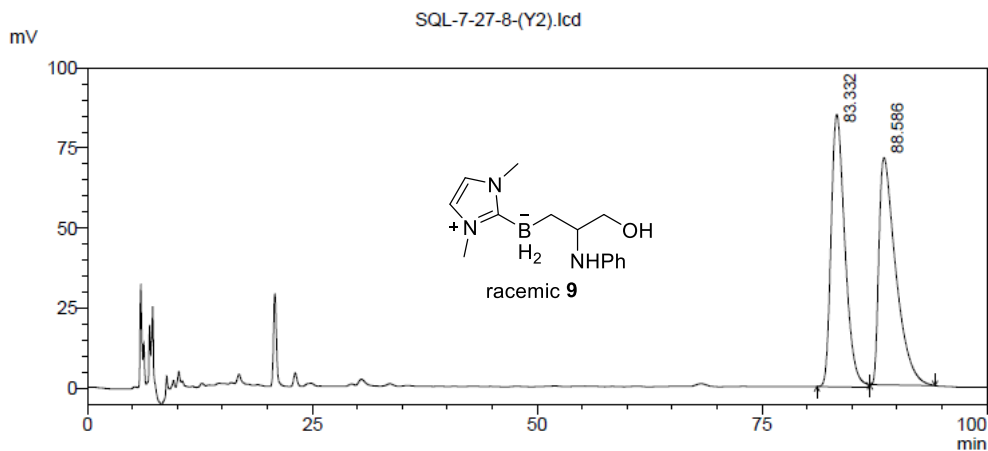

Detector A 214nm

| Pesk # | Ret. Time | Height | Area     | Area%   |
|--------|-----------|--------|----------|---------|
| 1      | 83.332    | 85130  | 9105288  | 49.534  |
| 2      | 88.586    | 70990  | 9276560  | 50.466  |
| Total  |           | 156120 | 18381848 | 100.000 |

### Supplementary Figure 280. HPLC spectrum of racemic **9**

#### HPLC spectrum of **9**

Tray# : 1  
 Vial# : 33  
 Data File : SQL-7-36-(Y3).lcd  
 Method File : 4OD-H-90-0.5-214-40min.lcm  
 Date Acquired : 1/22/2022 2:04:59 AM  
 Date Processed : 1/25/2022 1:37:25 AM

<Chromatogram View>

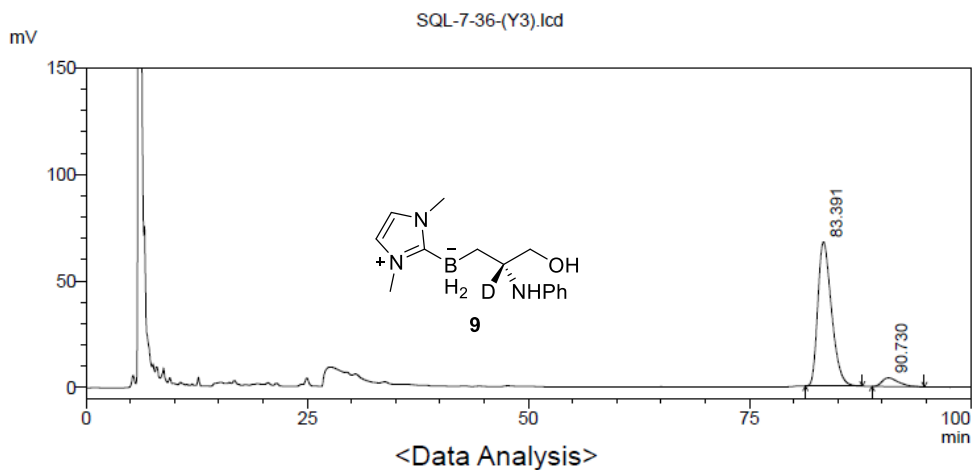

Detector A 214nm

| Pesk # | Ret. Time | Height | Area    | Area%   |
|--------|-----------|--------|---------|---------|
| 1      | 83.391    | 67682  | 7328586 | 93.248  |
| 2      | 90.730    | 4130   | 530641  | 6.752   |
| Total  |           | 71812  | 7859227 | 100.000 |

### Supplementary Figure 281. HPLC spectrum of **9**

$^1\text{H}$  NMR (400 MHz, room temperature,  $\text{CD}_3\text{OD}$ )

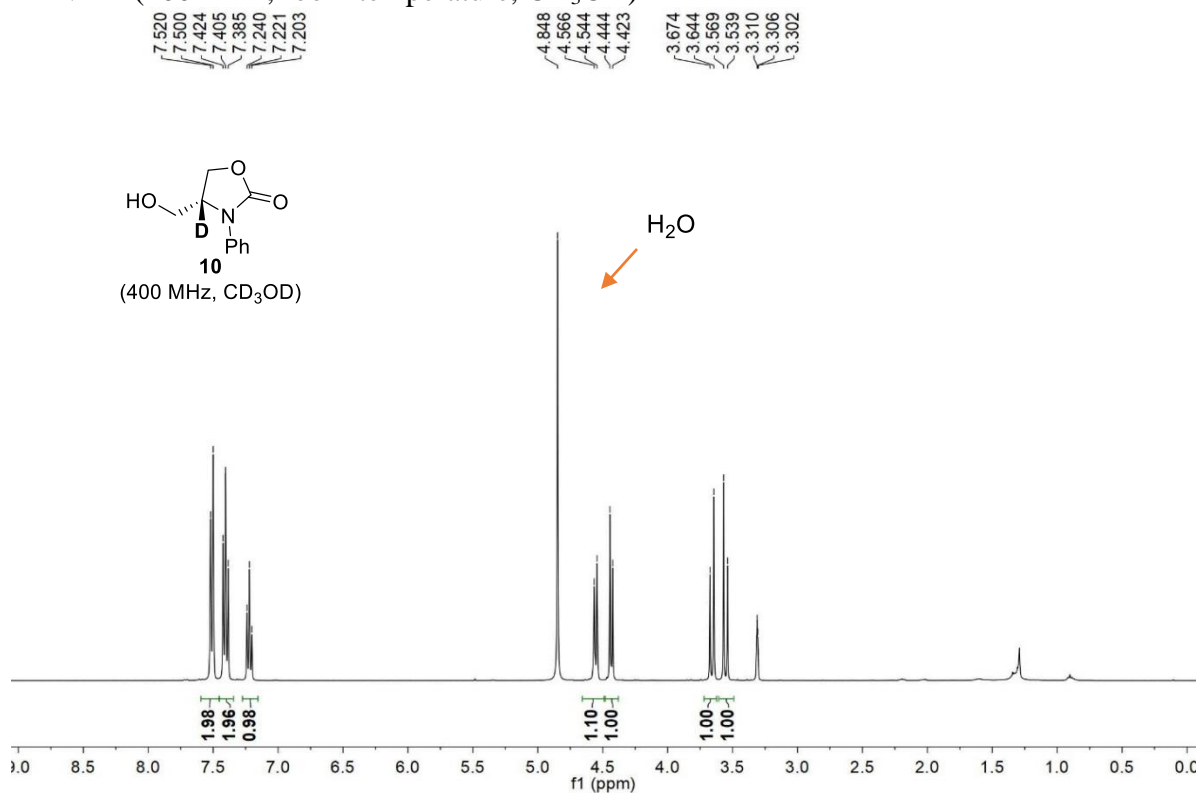

**Supplementary Figure 282.**  $^1\text{H}$  NMR spectrum of compound **10**

$^{13}\text{C}$  NMR (100 MHz, room temperature,  $\text{CD}_3\text{OD}$ )

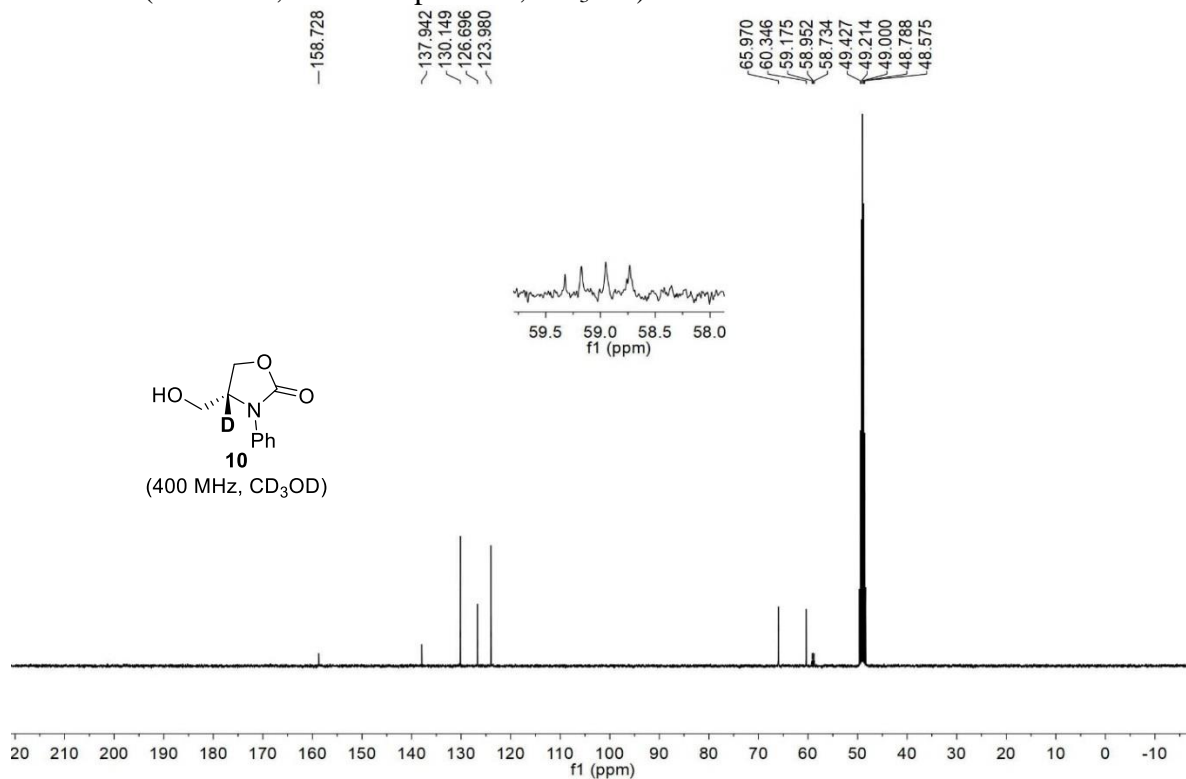

**Supplementary Figure 283.**  $^{13}\text{C}$  NMR spectrum of compound **10**

## HPLC spectrum of racemic **10**

Data File : SQL-6-89-9.lcd  
Method File : 4OD-H-80-0.5-214.lcm  
Date Acquired : 9/1/2021 9:20:14 PM  
Date Processed : 9/1/2021 11:05:05 PM

<Chromatogram View>

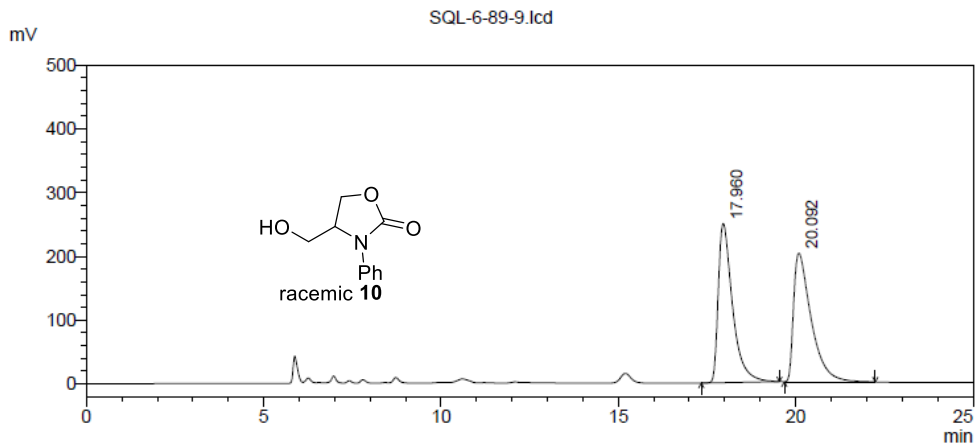

<Data Analysis>

| Detector A 214nm |           |        |          |         |
|------------------|-----------|--------|----------|---------|
| Peak #           | Ret. Time | Height | Area     | Area%   |
| 1                | 17.960    | 249671 | 6989809  | 50.084  |
| 2                | 20.092    | 201908 | 6966295  | 49.916  |
| Total            |           | 451579 | 13956103 | 100.000 |

## Supplementary Figure 284. HPLC spectrum of racemic **10**

### HPLC spectrum of **10**

Data File : SQL-6-96.lcd  
Method File : 4OD-H-80-0.5-214.lcm  
Date Acquired : 9/1/2021 8:54:08 PM  
Date Processed : 9/1/2021 11:04:48 PM

<Chromatogram View>

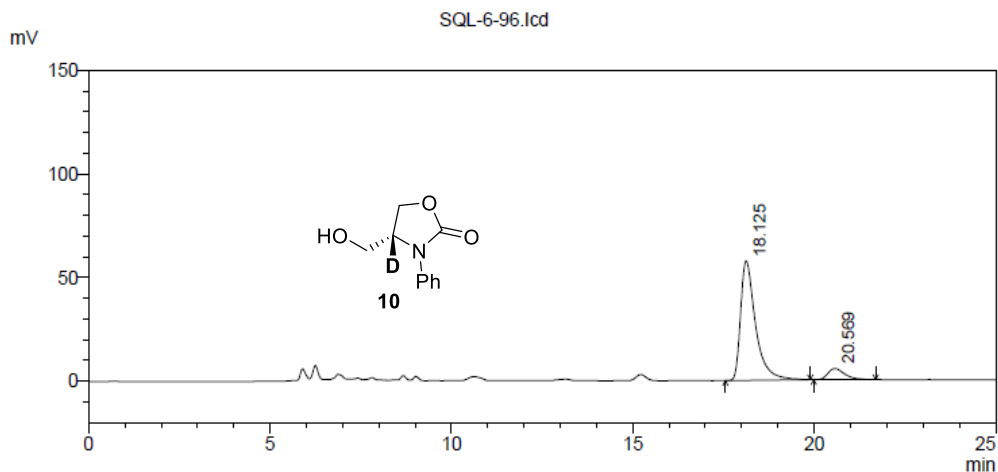

<Data Analysis>

| Detector A 214nm |           |        |         |         |
|------------------|-----------|--------|---------|---------|
| Peak #           | Ret. Time | Height | Area    | Area%   |
| 1                | 18.125    | 57709  | 1657035 | 90.511  |
| 2                | 20.569    | 5353   | 173729  | 9.489   |
| Total            |           | 63062  | 1830764 | 100.000 |

## Supplementary Figure 285. HPLC spectrum of **10**

$^1\text{H}$  NMR (400 MHz, room temperature,  $\text{CDCl}_3$ )

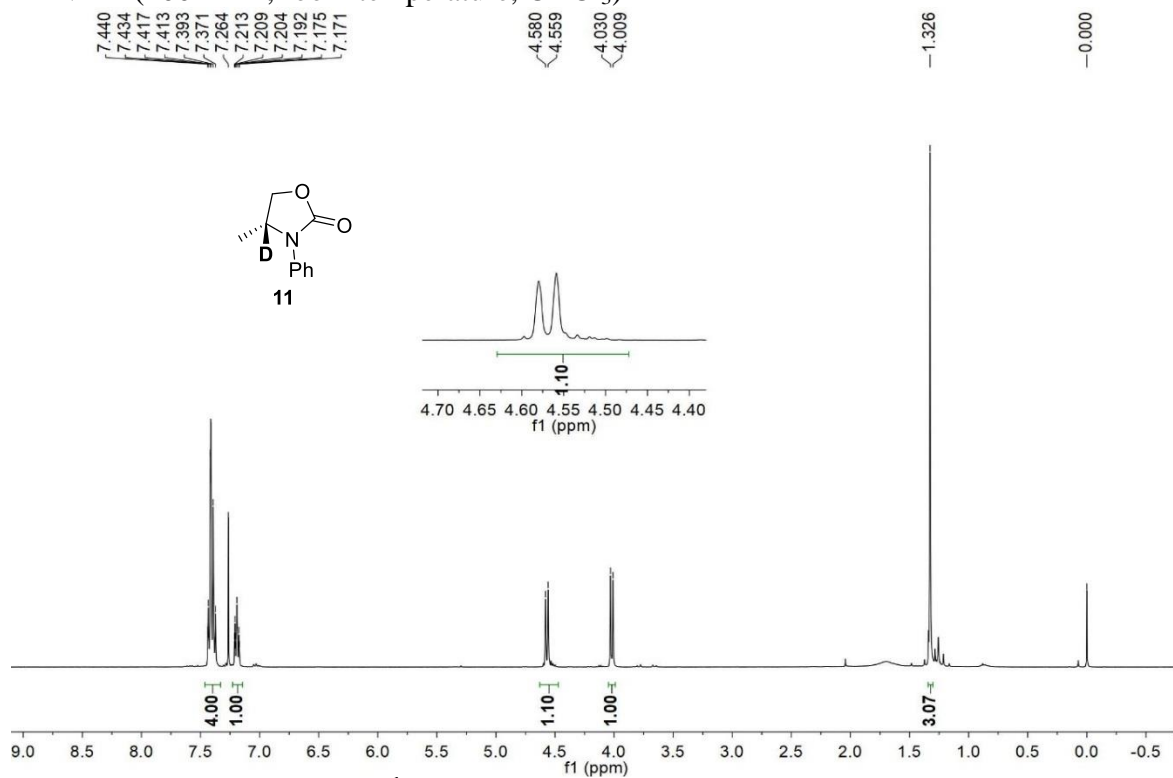

Supplementary Figure 286.  $^1\text{H}$  NMR spectrum of compound **11**

$^{13}\text{C}$  NMR (100 MHz, room temperature,  $\text{CDCl}_3$ )

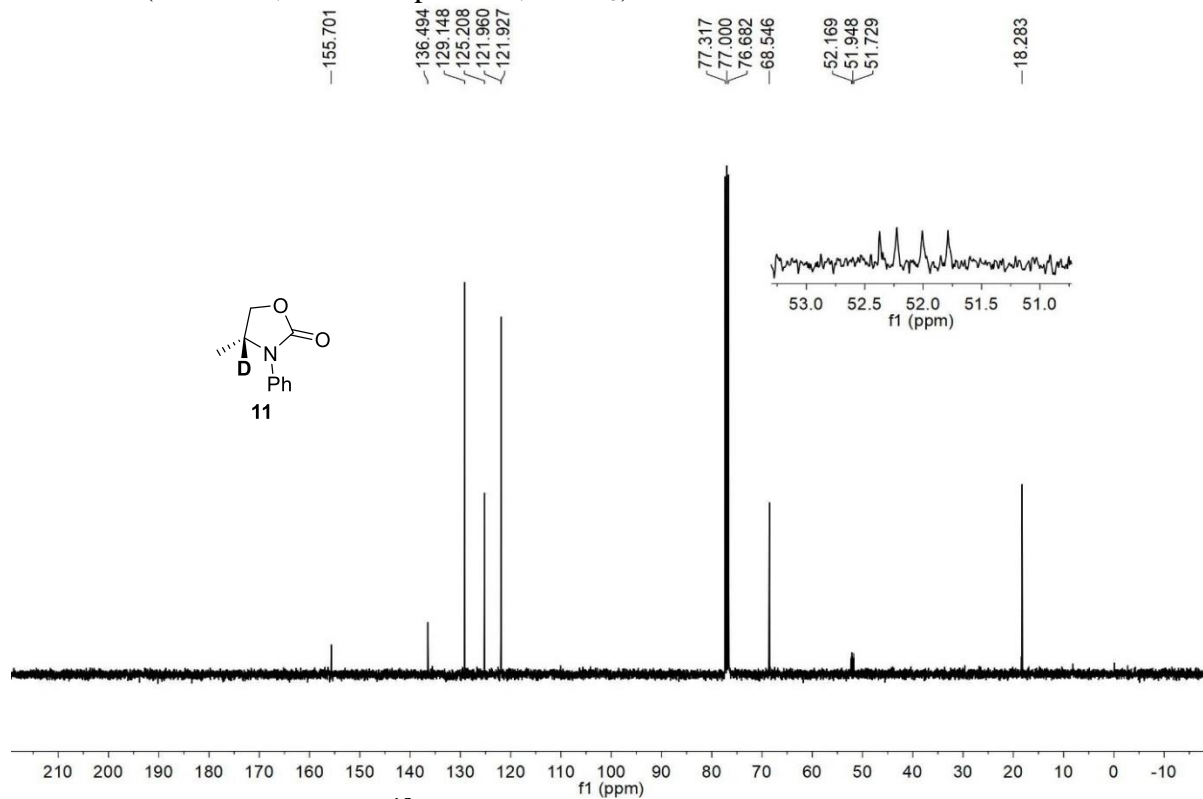

Supplementary Figure 287.  $^{13}\text{C}$  NMR spectrum of compound **11**

## HPLC spectrum of racemic **11**

Data File : sql-6-88-4.lcd  
Method File : 3AD-H-90-1-214.lcm  
Date Processed : 9/1/2021 4:27:09 PM

<Chromatogram View>

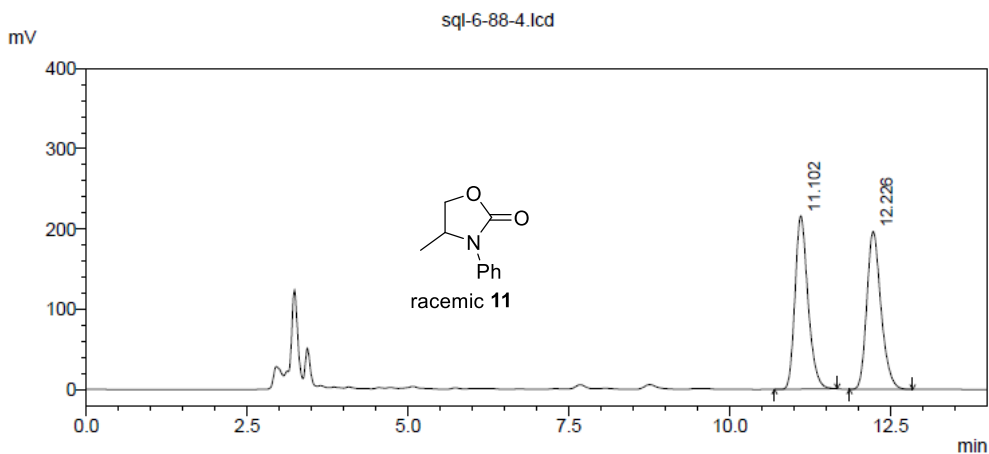

<Data Analysis>

Detector A 214nm

| Peak # | Ret. Time | Height | Area    | Area%   |
|--------|-----------|--------|---------|---------|
| 1      | 11.102    | 215770 | 3035063 | 50.042  |
| 2      | 12.226    | 196721 | 3029964 | 49.958  |
| Total  |           | 412491 | 6065028 | 100.000 |

## Supplementary Figure 288. HPLC spectrum of racemic **11**

## HPLC spectrum of **11**

Data File : sql-6-106.lcd  
Method File : 3AD-H-90-1-214.lcm  
Date Processed : 9/21/2021 4:03:02 PM

<Chromatogram View>

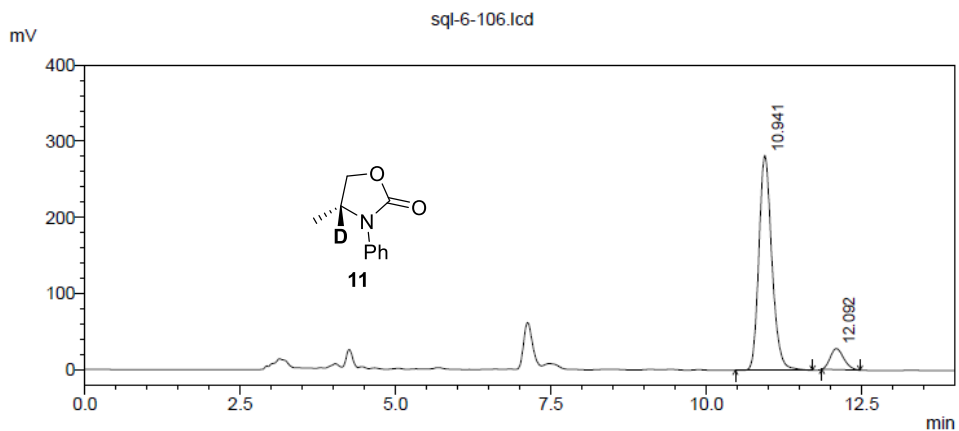

<Data Analysis>

Detector A 214nm

| Peak # | Ret. Time | Height | Area    | Area%   |
|--------|-----------|--------|---------|---------|
| 1      | 10.941    | 282225 | 4104733 | 90.724  |
| 2      | 12.092    | 27718  | 419670  | 9.276   |
| Total  |           | 309943 | 4524403 | 100.000 |

## Supplementary Figure 289. HPLC spectrum of **11**

$^1\text{H}$  NMR (400 MHz, room temperature,  $\text{CDCl}_3$ )

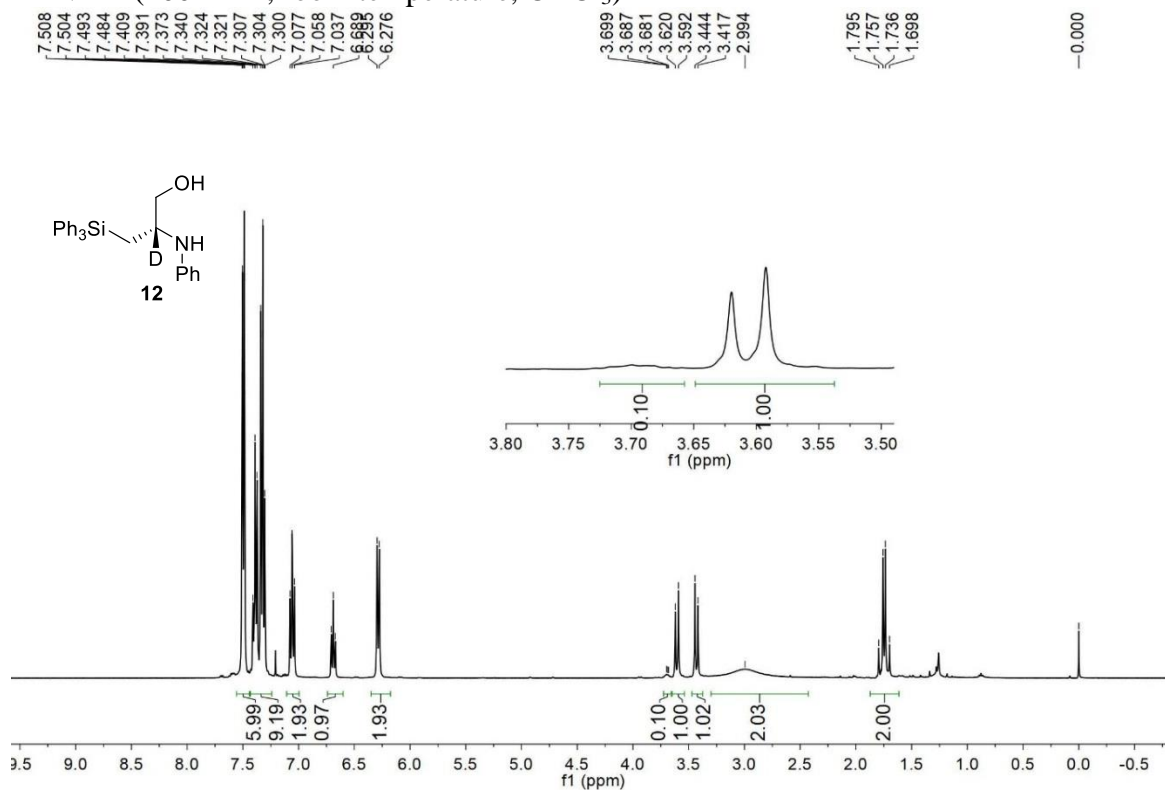

**Supplementary Figure 290.**  $^1\text{H}$  NMR spectrum of compound **12**

$^{13}\text{C}$  NMR (100 MHz, room temperature,  $\text{CDCl}_3$ )

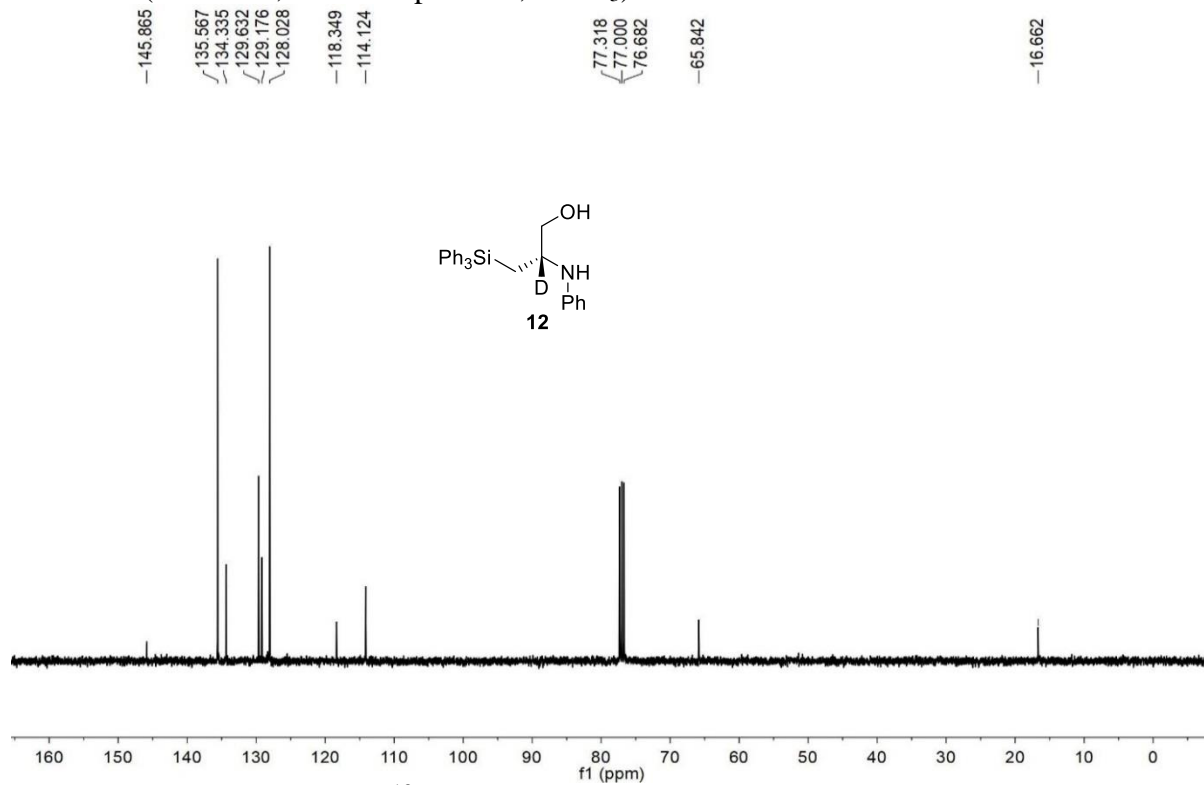

**Supplementary Figure 291.**  $^{13}\text{C}$  NMR spectrum of compound **12**



## HPLC spectrum of racemic **12**

Data File : sql-6-97-1Rac-3.lcd  
 Method File : 1OJ-H-85-1-214.lcm  
 Date Acquired : 9/8/2021 10:31:41 PM  
 Date Processed : 9/9/2021 10:27:51 PM

<Chromatogram View>

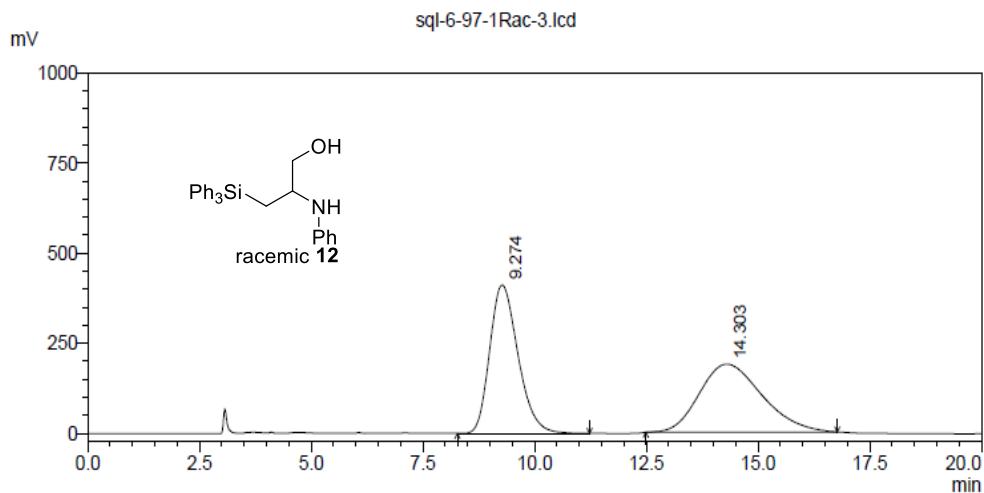

<Data Analysis>

| Detector A 214nm |           |        |          |         |
|------------------|-----------|--------|----------|---------|
| Pesk #           | Ret. Time | Height | Area     | Area%   |
| 1                | 9.274     | 411707 | 18182554 | 49.576  |
| 2                | 14.303    | 188759 | 18493694 | 50.424  |
| Total            |           | 600466 | 36676248 | 100.000 |

## Supplementary Figure 292. HPLC spectrum of racemic **12**

### HPLC spectrum of **12**

Data File : sql-6-97-2-chiral003.lcd  
 Method File : 1OJ-H-85-1-214.lcm  
 Date Acquired : 9/8/2021 10:00:59 PM  
 Date Processed : 9/8/2021 11:30:18 PM

<Chromatogram View>

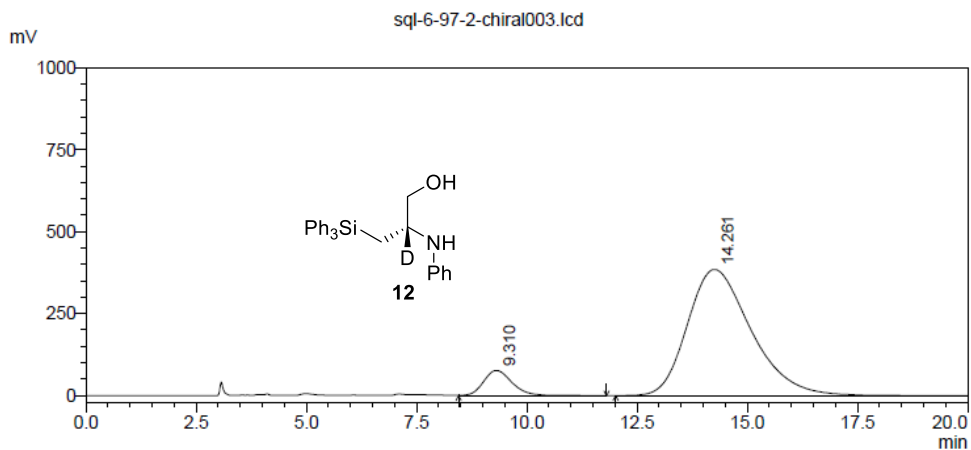

<Data Analysis>

| Detector A 214nm |           |        |          |         |
|------------------|-----------|--------|----------|---------|
| Pesk #           | Ret. Time | Height | Area     | Area%   |
| 1                | 9.310     | 76859  | 3466346  | 8.191   |
| 2                | 14.261    | 385056 | 38853332 | 91.809  |
| Total            |           | 461915 | 42319679 | 100.000 |

## Supplementary Figure 293. HPLC spectrum of **12**

### 3. Supplementary References

1. Luo, J., Zhang, J. Donor–acceptor fluorophores for visible-light-promoted organic synthesis: photoredox/Ni dual catalytic C(sp<sup>3</sup>)–C(sp<sup>2</sup>) cross-coupling. *ACS Catal.* **6**, 873-877 (2016).
2. Garreau, M., Vaillant, F. L., Waser, J. C-terminal bioconjugation of peptides through photoredox catalyzed decarboxylative alkynylation. *Angew. Chem. Int. Ed.* **58**, 8182-8186 (2019).
3. Schoenauer, S., Schieberle, P. Structure–odor activity studies on monoterpenoid mercaptans synthesized by changing the structural motifs of the key food odorant 1-*p*-menthene-8-thiol. *J. Agric. Food Chem.* **64**, 3849-3861 (2016).
4. Pichota, A., V Gramlich, A., Beck K., Seebach, D. Bioinspired desaturation of alcohols enabled by photoredox proton-coupled electron transfer and cobalt dual catalysis. *Helv. Chim. Acta.* **95**, 1239-1272 (2012).
5. Seebach, D., Jaeschke, G., Pichota, A., Audergon, L. Enantioselective 1,4-addition of aliphatic grignard reagents to enones catalyzed by readily available copper(I) thiolates derived from TADDOL. Preliminary communication. *Helv. Chim. Acta.* **80**, 2515-2519 (1997).
6. Shin, N. Y., Ryss, J. M., Zhang, X., Miller, S. J., Knowles, R. R. Light-driven deracemization enabled by excited-state electron transfer. *Science* **366**, 364-369 (2019).
7. Featherston, A. L., Kwon, Y., Pompeo, M. M., Engl, O. D., Leahy, D. K., Miller, S. J. Catalytic asymmetric and stereodivergent oligonucleotide synthesis. *Science* **371**, 702-707 (2021).
8. Doyle, L. M., O’Sullivan, S., Salvo, C. D., McKinney, M., McArdle, P., Murphy, P.V. Stereoselective epimerizations of glycosyl thiols. *Org. Lett.* **19**, 5802-5805 (2017).
9. Abronina, P. I., Galkin, K. I., Backinowsky, L. V., Gracheva, A. A. Synthesis of a derivative of a pentasaccharide repeating unit of the O-antigenic polysaccharide of the bacterium *Klebsiella pneumoniae* O<sub>3</sub> as a benzoylated 2-methoxycarbonylethyl thioglycoside. *Russ. Chem. Bull.* **58**, 457-467 (2009).
10. Cai, Y., Roberts, B. P., Tocher, D. A. Carbohydrate-derived thiols as protic polarity-reversal catalysts for enantioselective radical-chain reactions. *J. Chem. Soc., Perkin Trans.1*, 1376-1386 (2002).

11. Haque, M. B., Roberts, B. P., Tocher, D. A. Enantioselective radical-chain hydrosilylation of alkenes using homochiral thiols as polarity-reversal catalysts. *J. Chem. Soc., Perkin Trans.1*, 2881-2889 (1998).
12. Larsen, J., Bechgaard, K. Thiaheterohelicenes 2. Synthesis of alkylated thiaheterohelicenes. *Acta Chem. Scand.* **50**, 77-82 (1996).
13. Wang, J. L., Li, H. J., Wang, H. S., Wu, Y. C. Regioselective 1,2-diol rearrangement by controlling the loading of  $\text{BF}_3 \cdot \text{Et}_2\text{O}$  and its application to the synthesis of related nor-sesquiterene- and sesquiterene-type marine natural products. *Org. Lett.* **19**, 3811-3814 (2017).
14. Ramesh, R., Chandrasekaran, Y., Megha R., Chandrasekaran, S. Base catalyzed cyclization of N-aryl and N-alkyl-O-propargyl carbamates to 4-alkylidene-2-oxazolidinones. *Tetrahedron* **63**, 9153-9162 (2007).
15. Hu, T., Li, C. Synthesis of lactams via copper-catalyzed intramolecular vinylation of amides. *Org. Lett.* **7**, 2035-2038 (2005).
16. Solovyev, A., Ueng, S., Monot, J., Fensterbank, L., Malacria, M., Lacôte, E., and Curran, D. P. Estimated rate constants for hydrogen abstraction from N-heterocyclic carbene–borane complexes by an alkyl radical. *Org. Lett.* **12**, 2998–3001 (2010).
17. Gardner, S., Kawamoto, T., Curran, D. P. Synthesis of 1,3-dialkylimidazol-2-ylidene boranes from 1,3-dialkylimidazolium iodides and sodium borohydride. *J. Org. Chem.* **80**, 9794-9797 (2015).
18. Cismesia, M. A., Yoon, T. P. Characterizing chain processes in visible light photoredox catalysis. *Chem. Sci.* **6**, 5426-5434 (2015).
19. Ham, W. S., Hillenbrand, J., Jacq, J., Genicot, C., Ritter, T. Divergent late-stage (hetero)aryl C–H amination by the pyridinium radical cation. *Angew. Chem. Int. Ed.* **58**, 532-536 (2019).
20. Luis-Barrera, J., LainaMartin, V., Rigotti, T., Peccati, F., Solans-Monfort, X., Sodupe, M., Mas-Balleste, R., Liras, M., Alemán, J. Visible-light photocatalytic intramolecular cyclopropane ring expansion. *Angew. Chem. Int. Ed.* **56**, 7826-7830 (2017).
21. Klauck, F. J. R., James, M. J., Glorius, F. Deaminative strategy for the visible-light-mediated generation of alkyl radicals. *Angew. Chem. Int. Ed.* **56**, 12336-12339 (2017).
22. Quantum yield for the ferrioxalate actinometer was reported to be 1.11 at 436 nm. We thus chose 1.11 as quantum yield for the ferrioxalate actinometer at 441 nm to determine the

- photo flux of the light source. For details, see: Kuhn, H. J., Braslavsky, S. E., Schmidt, R. Chemical actinometry (IUPAC technical report). *Pure Appl. Chem.* **76**, 2105-2146 (2004).
23. Monalti, M., Credi, A., Prodi, L., Gandolfi, M. T. *Chemical Actinometry. Handbook of Photochemistry, 3rd Ed.* 601-604 (2006).
  24. Gaussian 16, Revision C.01, Frisch, M. J., Trucks, G. W., Schlegel, H. B., Scuseria, G. E., Robb, M. A., Cheeseman, J. R., Scalmani, G., Barone, V., Petersson, G. A., Nakatsuji, H., Li, X., Caricato, M., Marenich, A. V., Bloino, J., Janesko, B. G., Gomperts, R., Mennucci, B., Hratchian, H. P., Ortiz, J. V., Izmaylov, A. F., Sonnenberg, J. L., Williams-Young, D., Ding, F., Lipparini, F., Egidi, F., Goings, J., Peng, B., Petrone, A., Henderson, T., Ranasinghe, D., Zakrzewski, V. G., Gao, J., Rega, N., Zheng, G., Liang, W., Hada, M., Ehara, M., Toyota, K., Fukuda, R., Hasegawa, J., Ishida, M., Nakajima, T., Honda, Y., Kitao, O., Nakai, H., Vreven, T., Throssell, K., Montgomery, J. A., Jr., Peralta, J. E., Ogliaro, F., Bearpark, M. J., Heyd, J. J., Brothers, E. N., Kudin, K. N., Staroverov, V. N., Keith, T. A., Kobayashi, R., Normand, J., Raghavachari, K., Rendell, A. P., Burant, J. C., Iyengar, S. S., Tomasi, J., Cossi, M., Millam, J. M., Klene, M., Adamo, C., Cammi, R., Ochterski, J. W., Martin, R. L., Morokuma, K., Farkas, O., Foresman, J. B., Fox, D. J., *Gaussian, Inc., Wallingford CT* (2016).
  25. Chai, J. D., Head-Gordon, M. Long-range corrected hybrid density functionals with damped atom–atom dispersion corrections. *Phys. Chem. Chem. Phys.* **10**, 6615-6620 (2008).
  26. Luchini, G., Alegre-Requena, J. V., Funes-Ardoiz, I., Paton, R. S. GoodVibes: automated thermochemistry for heterogeneous computational chemistry data [version 1; peer review: 2 approved with reservations]. *F1000Research*. **9**, 291, 1-14, (2020).
  27. Grimme, S. Supramolecular binding thermodynamics by dispersion-corrected density functional theory. *Chem. Eur. J.* **18**, 9955-9964 (2012).
  28. Adamo C., Barone, V. Toward reliable density functional methods without adjustable parameters: The PBE0 model. *J. Chem. Phys.* **110**, 6158-6169 (1999).
  29. Minenkov, Y., Singstad, Å., Occhipinti G., Jensen, V. R. The accuracy of DFT-optimized geometries of functional transition metal compounds: a validation study of catalysts for olefin metathesis and other reactions in the homogeneous phase. *Dalton Trans.* **41**, 5526-5541 (2012).
  30. Barone, V., Cossi, M. Quantum calculation of molecular energies and energy gradients in solution by a conductor solvent model. *J. Phys. Chem. A.* **102**, 1995-2001 (1998).

31. Cossi, M., Rega, N., Scalmani, G., Barone, V. Energies, structures, and electronic properties of molecules in solution with the C-PCM solvation model. *J. Comp. Chem.* **24**, 669-681 (2003).
32. Metrano, A. J., Abascal, N. C., Mercado, B. Q., Paulson, E. K., Hurtley, A. E., Miller, S. J. Energies, structures, and electronic properties of molecules in solution with the C-PCM solvation model. *J. Am. Chem. Soc.* **139**, 492-516 (2017).
33. Johnson, E. R., Keinan, S., Mori-Sanchez P., Contreras-Garcia J., Cohen, A. J., Yang W. Revealing noncovalent interactions. *J. Am. Chem. Soc.* **132**, 6498-6506 (2010).
34. Contreras-Garcia, J., Johnson, E. R., Keinan, S., Chaudret, R., Piquemal, J. P., Beratan, D. N., Yang, W. NCIPLLOT: a program for plotting noncovalent interaction regions. *J. Chem. Theory Comput.* **7**, 625-632 (2011).
