# Supplementary material for: Visible-light mediated catalytic asymmetric radical deuteration at non-benzylic positions
Source: PubMed Central journal article supplement (PMC9343372; doi:10.1038/s41467-022-32238-8), 2022-08-01
Supplement: 41467_2022_32238_MOESM2_ESM.pdf [file 41467_2022_32238_MOESM2_ESM.pdf]

Supplementary Data File 1: XYZ Coordinates and Energies of the Calculated Species
