# Supplementary material for: Visible-light mediated catalytic asymmetric radical deuteration at non-benzylic positions
Source: PubMed Central journal article supplement (PMC9343372; doi:10.1038/s41467-022-32238-8), 2022-08-01
Supplement: 41467_2022_32238_MOESM3_ESM.pdf [file 41467_2022_32238_MOESM3_ESM.pdf]

## XYZ Coordinates and Energies of the Calculated Species

Final free energies are calculated as the sum of E (large basis set) +  $G^D_{\text{Corr}}$ .  $G^D_{\text{Corr}}$  refers to the free energy correction of deuterated species. Energies for Distortion-Interaction analysis are included in the **TS-Re** and **TS-Si** as fragments 1 (radical) and 2 (RS-D).

### TS-Si

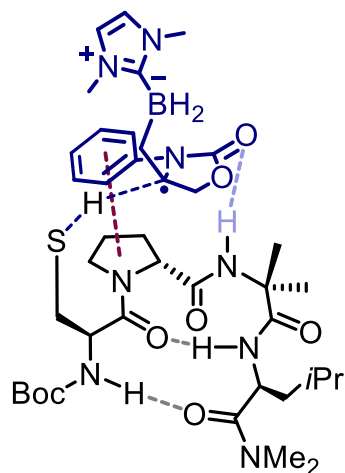

E (PBE0) = -3023.61556

E(rad-dist/int) = -921.8277869

E(RSD-dist/int) = -2101.742878

$G^D_{\text{Corr}}$  = 0.963495

E(M062X) = -3025.556844

E(wB97xD) = -3025.868055

|   |             |             |             |
|---|-------------|-------------|-------------|
| O | -3.32592400 | 1.17709300  | -1.70481900 |
| O | -1.66682500 | 4.87907600  | 1.29303500  |
| O | -1.98536000 | 1.01539000  | 2.61029400  |
| O | -0.21643300 | 0.23676000  | -0.36083000 |
| O | -3.38185900 | -3.74398000 | -0.64517700 |
| O | -5.03512400 | -2.16594200 | -0.70390700 |
| N | -4.28303300 | 2.17170300  | 0.08186400  |
| N | -1.31734100 | 2.90617200  | 0.22221900  |
| H | -0.82336900 | 2.01651300  | 0.21427000  |
| N | 0.10710000  | 1.88962100  | 2.32772600  |
| H | 1.05909800  | 1.64779400  | 2.06455900  |
| N | -0.80840800 | -1.27967200 | 1.19487500  |
| N | -2.93907200 | -1.51302800 | -0.89773100 |
| H | -3.34854800 | -0.60128900 | -1.10758900 |
| C | -4.26905200 | 3.09875600  | 1.20558900  |
| H | -3.75907000 | 2.64582700  | 2.06320300  |
| H | -5.30213400 | 3.32954500  | 1.47579900  |
| H | -3.76565100 | 4.03007000  | 0.95579600  |

|   |             |             |             |
|---|-------------|-------------|-------------|
| C | -5.23248800 | 1.07213300  | 0.19691400  |
| H | -5.41607200 | 0.62908700  | -0.78035300 |
| H | -6.17111600 | 1.45590600  | 0.60247700  |
| H | -4.84838100 | 0.29357100  | 0.86662800  |
| C | -3.33004400 | 2.09562100  | -0.87088900 |
| C | -2.20724100 | 3.15655800  | -0.89973800 |
| H | -2.63241400 | 4.15123900  | -0.75103500 |
| C | -1.14651500 | 3.76233700  | 1.24655900  |
| C | -0.20659200 | 3.31517300  | 2.38806100  |
| C | -0.77868000 | 0.87587400  | 2.41998600  |
| C | -0.16064500 | -0.52158000 | 2.27220400  |
| H | 0.90742500  | -0.43983000 | 2.05282500  |
| C | -0.39776500 | -1.38316200 | 3.52234000  |
| H | 0.44196700  | -1.31449600 | 4.21661100  |
| H | -1.30310400 | -1.03900200 | 4.03159300  |
| C | -0.61218200 | -2.79130900 | 2.96298100  |
| H | 0.34812800  | -3.25645600 | 2.71818200  |
| H | -1.15079600 | -3.44488000 | 3.65225400  |
| C | -1.39911100 | -2.53023900 | 1.68269200  |
| H | -1.30331100 | -3.32898000 | 0.94721300  |
| H | -2.46541400 | -2.38139300 | 1.88926200  |
| C | -0.77801000 | -0.83110500 | -0.06980700 |
| C | -1.51718700 | -1.65368300 | -1.13870100 |
| H | -1.27324300 | -2.71327100 | -1.03098600 |
| C | -3.75806600 | -2.58354400 | -0.74605500 |
| C | -6.13108600 | -3.06652900 | -0.36194400 |
| C | -7.33719900 | -2.13080500 | -0.35858300 |
| H | -7.20947000 | -1.34288300 | 0.38952500  |
| H | -8.24442700 | -2.69337600 | -0.12105500 |
| H | -7.46286500 | -1.66376100 | -1.33953700 |
| C | -5.90784300 | -3.65700400 | 1.02929700  |
| H | -5.05565100 | -4.33803800 | 1.03879700  |
| H | -6.80157500 | -4.20928100 | 1.33504800  |
| H | -5.73465300 | -2.85649200 | 1.75559300  |
| C | -6.28717900 | -4.14376900 | -1.43311000 |
| H | -6.38904600 | -3.68267100 | -2.42013500 |
| H | -7.19190700 | -4.72548300 | -1.23117900 |
| H | -5.42938900 | -4.81716500 | -1.44205100 |
| C | -1.45115100 | 3.10640100  | -2.22934800 |
| H | -2.15454800 | 3.36349400  | -3.03148700 |
| H | -1.14120000 | 2.07195900  | -2.40838800 |
| C | -0.22320400 | 4.02209800  | -2.30686200 |
| H | 0.50058900  | 3.67578500  | -1.55672000 |
| C | -0.55378900 | 5.48731400  | -2.00850400 |

|   |             |             |             |
|---|-------------|-------------|-------------|
| H | -1.33062100 | 5.85246400  | -2.69269900 |
| H | 0.33204300  | 6.11688500  | -2.14472700 |
| H | -0.90865700 | 5.62743900  | -0.98332000 |
| C | 0.42460300  | 3.89007300  | -3.68864000 |
| H | 0.63809100  | 2.84543800  | -3.93958600 |
| H | 1.36505400  | 4.44885100  | -3.73689000 |
| H | -0.24104200 | 4.28555400  | -4.46553200 |
| C | -1.16561800 | -1.19970000 | -2.55601800 |
| H | -1.92475800 | -1.60627000 | -3.22983000 |
| H | -1.20866600 | -0.11196100 | -2.62472600 |
| C | 1.11450800  | 4.07411000  | 2.18923600  |
| H | 0.92366600  | 5.14854200  | 2.21038700  |
| H | 1.81349700  | 3.82196600  | 2.99231200  |
| H | 1.57620800  | 3.81477600  | 1.23142400  |
| C | -0.83446700 | 3.68150500  | 3.73793700  |
| H | -0.13604300 | 3.41924300  | 4.53793700  |
| H | -1.03544000 | 4.75329100  | 3.77283800  |
| H | -1.76929100 | 3.13959200  | 3.89197600  |
| S | 0.41439900  | -1.82882500 | -3.19993200 |
| H | 1.41985400  | -1.07352600 | -2.31497800 |
| C | 2.60422900  | -0.41738100 | -1.80096500 |
| C | 2.30866300  | 1.04475500  | -2.07647400 |
| C | 2.61246200  | 0.79662600  | 0.16129800  |
| N | 2.67303600  | -0.46448500 | -0.37908600 |
| H | 3.01596200  | 1.48683600  | -2.77984400 |
| C | 2.75564600  | -1.65454100 | 0.38870200  |
| C | 3.44552500  | -1.68141500 | 1.60343000  |
| C | 2.14221100  | -2.81753300 | -0.08625000 |
| C | 3.52054200  | -2.86679300 | 2.32872900  |
| H | 3.92241500  | -0.78462400 | 1.97440600  |
| C | 2.23326500  | -3.99880300 | 0.64284400  |
| H | 1.59301700  | -2.80600900 | -1.02115500 |
| C | 2.92228000  | -4.03198500 | 1.85343400  |
| H | 4.06118400  | -2.87584700 | 3.27003800  |
| H | 1.75267800  | -4.89358400 | 0.26049800  |
| H | 2.98778500  | -4.95373100 | 2.42218500  |
| C | 3.68122800  | -1.12523400 | -2.57218500 |
| H | 3.66554400  | -2.19212200 | -2.31848200 |
| H | 3.42234900  | -1.06229700 | -3.63568700 |
| O | 2.46018000  | 1.70367700  | -0.80454600 |
| O | 2.71570000  | 1.10720700  | 1.33705200  |
| H | 1.27999400  | 1.20838300  | -2.40787900 |
| B | 5.18883600  | -0.46779400 | -2.39152400 |
| H | 5.96631500  | -1.11085200 | -3.08449700 |

|   |            |             |             |
|---|------------|-------------|-------------|
| H | 5.19858400 | 0.69487900  | -2.75673000 |
| C | 5.76208200 | -0.54805100 | -0.88216400 |
| N | 6.15254900 | -1.67422700 | -0.24201700 |
| N | 6.03833200 | 0.45843500  | -0.02040400 |
| C | 6.67499400 | -1.37832100 | 0.99859500  |
| C | 5.96474100 | -3.02550900 | -0.74742000 |
| C | 6.60707400 | -0.03390200 | 1.13826400  |
| C | 5.80377400 | 1.88060500  | -0.23817000 |
| H | 7.03190200 | -2.14333600 | 1.66871400  |
| H | 6.75617000 | -3.66352800 | -0.35338300 |
| H | 4.99091200 | -3.40915600 | -0.43152300 |
| H | 6.01846600 | -3.00662300 | -1.83541600 |
| H | 6.90342000 | 0.61159000  | 1.94911400  |
| H | 5.15888200 | 2.26436700  | 0.55455300  |
| H | 6.75600600 | 2.41435700  | -0.23596400 |
| H | 5.31684400 | 2.01300800  | -1.20065500 |

**TS-Re**

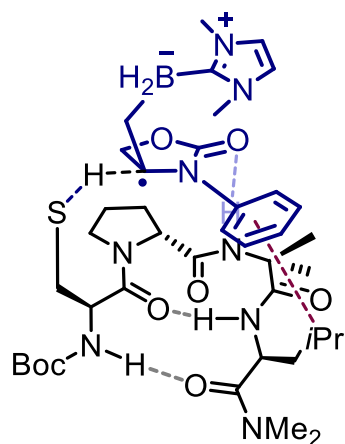

E (PBE0) = -3023.611538

E(rad-dist/int) = -921.828477

E(RSD-dist/int) = -2101.74075

$G^D_{\text{Corr}} = 0.961447$

E(M062X) = -3025.551376

E(wB97xD) = -3025.862599

|   |             |             |             |
|---|-------------|-------------|-------------|
| O | -3.32592400 | 1.17709300  | -1.70481900 |
| O | -1.66682500 | 4.87907600  | 1.29303500  |
| O | -1.98536000 | 1.01539000  | 2.61029400  |
| O | -0.21643300 | 0.23676000  | -0.36083000 |
| O | -3.38185900 | -3.74398000 | -0.64517700 |
| O | -5.03512400 | -2.16594200 | -0.70390700 |

|   |             |             |             |
|---|-------------|-------------|-------------|
| N | -4.28303300 | 2.17170300  | 0.08186400  |
| N | -1.31734100 | 2.90617200  | 0.22221900  |
| H | -0.82336900 | 2.01651300  | 0.21427000  |
| N | 0.10710000  | 1.88962100  | 2.32772600  |
| H | 1.05909800  | 1.64779400  | 2.06455900  |
| N | -0.80840800 | -1.27967200 | 1.19487500  |
| N | -2.93907200 | -1.51302800 | -0.89773100 |
| H | -3.34854800 | -0.60128900 | -1.10758900 |
| C | -4.26905200 | 3.09875600  | 1.20558900  |
| H | -3.75907000 | 2.64582700  | 2.06320300  |
| H | -5.30213400 | 3.32954500  | 1.47579900  |
| H | -3.76565100 | 4.03007000  | 0.95579600  |
| C | -5.23248800 | 1.07213300  | 0.19691400  |
| H | -5.41607200 | 0.62908700  | -0.78035300 |
| H | -6.17111600 | 1.45590600  | 0.60247700  |
| H | -4.84838100 | 0.29357100  | 0.86662800  |
| C | -3.33004400 | 2.09562100  | -0.87088900 |
| C | -2.20724100 | 3.15655800  | -0.89973800 |
| H | -2.63241400 | 4.15123900  | -0.75103500 |
| C | -1.14651500 | 3.76233700  | 1.24655900  |
| C | -0.20659200 | 3.31517300  | 2.38806100  |
| C | -0.77868000 | 0.87587400  | 2.41998600  |
| C | -0.16064500 | -0.52158000 | 2.27220400  |
| H | 0.90742500  | -0.43983000 | 2.05282500  |
| C | -0.39776500 | -1.38316200 | 3.52234000  |
| H | 0.44196700  | -1.31449600 | 4.21661100  |
| H | -1.30310400 | -1.03900200 | 4.03159300  |
| C | -0.61218200 | -2.79130900 | 2.96298100  |
| H | 0.34812800  | -3.25645600 | 2.71818200  |
| H | -1.15079600 | -3.44488000 | 3.65225400  |
| C | -1.39911100 | -2.53023900 | 1.68269200  |
| H | -1.30331100 | -3.32898000 | 0.94721300  |
| H | -2.46541400 | -2.38139300 | 1.88926200  |
| C | -0.77801000 | -0.83110500 | -0.06980700 |
| C | -1.51718700 | -1.65368300 | -1.13870100 |
| H | -1.27324300 | -2.71327100 | -1.03098600 |
| C | -3.75806600 | -2.58354400 | -0.74605500 |
| C | -6.13108600 | -3.06652900 | -0.36194400 |
| C | -7.33719900 | -2.13080500 | -0.35858300 |
| H | -7.20947000 | -1.34288300 | 0.38952500  |
| H | -8.24442700 | -2.69337600 | -0.12105500 |
| H | -7.46286500 | -1.66376100 | -1.33953700 |
| C | -5.90784300 | -3.65700400 | 1.02929700  |
| H | -5.05565100 | -4.33803800 | 1.03879700  |

|   |             |             |             |
|---|-------------|-------------|-------------|
| H | -6.80157500 | -4.20928100 | 1.33504800  |
| H | -5.73465300 | -2.85649200 | 1.75559300  |
| C | -6.28717900 | -4.14376900 | -1.43311000 |
| H | -6.38904600 | -3.68267100 | -2.42013500 |
| H | -7.19190700 | -4.72548300 | -1.23117900 |
| H | -5.42938900 | -4.81716500 | -1.44205100 |
| C | -1.45115100 | 3.10640100  | -2.22934800 |
| H | -2.15454800 | 3.36349400  | -3.03148700 |
| H | -1.14120000 | 2.07195900  | -2.40838800 |
| C | -0.22320400 | 4.02209800  | -2.30686200 |
| H | 0.50058900  | 3.67578500  | -1.55672000 |
| C | -0.55378900 | 5.48731400  | -2.00850400 |
| H | -1.33062100 | 5.85246400  | -2.69269900 |
| H | 0.33204300  | 6.11688500  | -2.14472700 |
| H | -0.90865700 | 5.62743900  | -0.98332000 |
| C | 0.42460300  | 3.89007300  | -3.68864000 |
| H | 0.63809100  | 2.84543800  | -3.93958600 |
| H | 1.36505400  | 4.44885100  | -3.73689000 |
| H | -0.24104200 | 4.28555400  | -4.46553200 |
| C | -1.16561800 | -1.19970000 | -2.55601800 |
| H | -1.92475800 | -1.60627000 | -3.22983000 |
| H | -1.20866600 | -0.11196100 | -2.62472600 |
| C | 1.11450800  | 4.07411000  | 2.18923600  |
| H | 0.92366600  | 5.14854200  | 2.21038700  |
| H | 1.81349700  | 3.82196600  | 2.99231200  |
| H | 1.57620800  | 3.81477600  | 1.23142400  |
| C | -0.83446700 | 3.68150500  | 3.73793700  |
| H | -0.13604300 | 3.41924300  | 4.53793700  |
| H | -1.03544000 | 4.75329100  | 3.77283800  |
| H | -1.76929100 | 3.13959200  | 3.89197600  |
| S | 0.41439900  | -1.82882500 | -3.19993200 |
| H | 1.41985400  | -1.07352600 | -2.31497800 |
| C | 2.60422900  | -0.41738100 | -1.80096500 |
| C | 2.30866300  | 1.04475500  | -2.07647400 |
| C | 2.61246200  | 0.79662600  | 0.16129800  |
| N | 2.67303600  | -0.46448500 | -0.37908600 |
| H | 3.01596200  | 1.48683600  | -2.77984400 |
| C | 2.75564600  | -1.65454100 | 0.38870200  |
| C | 3.44552500  | -1.68141500 | 1.60343000  |
| C | 2.14221100  | -2.81753300 | -0.08625000 |
| C | 3.52054200  | -2.86679300 | 2.32872900  |
| H | 3.92241500  | -0.78462400 | 1.97440600  |
| C | 2.23326500  | -3.99880300 | 0.64284400  |
| H | 1.59301700  | -2.80600900 | -1.02115500 |

|   |            |             |             |
|---|------------|-------------|-------------|
| C | 2.92228000 | -4.03198500 | 1.85343400  |
| H | 4.06118400 | -2.87584700 | 3.27003800  |
| H | 1.75267800 | -4.89358400 | 0.26049800  |
| H | 2.98778500 | -4.95373100 | 2.42218500  |
| C | 3.68122800 | -1.12523400 | -2.57218500 |
| H | 3.66554400 | -2.19212200 | -2.31848200 |
| H | 3.42234900 | -1.06229700 | -3.63568700 |
| O | 2.46018000 | 1.70367700  | -0.80454600 |
| O | 2.71570000 | 1.10720700  | 1.33705200  |
| H | 1.27999400 | 1.20838300  | -2.40787900 |
| B | 5.18883600 | -0.46779400 | -2.39152400 |
| H | 5.96631500 | -1.11085200 | -3.08449700 |
| H | 5.19858400 | 0.69487900  | -2.75673000 |
| C | 5.76208200 | -0.54805100 | -0.88216400 |
| N | 6.15254900 | -1.67422700 | -0.24201700 |
| N | 6.03833200 | 0.45843500  | -0.02040400 |
| C | 6.67499400 | -1.37832100 | 0.99859500  |
| C | 5.96474100 | -3.02550900 | -0.74742000 |
| C | 6.60707400 | -0.03390200 | 1.13826400  |
| C | 5.80377400 | 1.88060500  | -0.23817000 |
| H | 7.03190200 | -2.14333600 | 1.66871400  |
| H | 6.75617000 | -3.66352800 | -0.35338300 |
| H | 4.99091200 | -3.40915600 | -0.43152300 |
| H | 6.01846600 | -3.00662300 | -1.83541600 |
| H | 6.90342000 | 0.61159000  | 1.94911400  |
| H | 5.15888200 | 2.26436700  | 0.55455300  |
| H | 6.75600600 | 2.41435700  | -0.23596400 |
| H | 5.31684400 | 2.01300800  | -1.20065500 |

### Radical Adduct

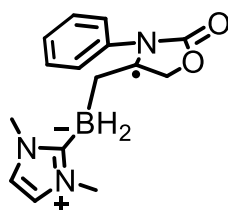

E (PBE0) = -921.830204

$G^D_{\text{Corr}} = 0.287218$

|   |            |             |            |
|---|------------|-------------|------------|
| C | 1.08522400 | -1.46238200 | 1.21050000 |
|---|------------|-------------|------------|

|   |             |             |              |
|---|-------------|-------------|--------------|
| C | 2.48293200  | -1.87898300 | 0.86290700   |
| C | 1.30302600  | -1.62496300 | -1.08441100  |
| N | 0.43174400  | -1.38473700 | -0.04150400  |
| H | 3.23087300  | -1.16795400 | 1.23002300   |
| C | -0.96299000 | -1.20439900 | -0.20071300  |
| C | -1.47788300 | -0.46580300 | -1.26747100  |
| C | -1.82925500 | -1.75848600 | 0.74668400   |
| C | -2.85263900 | -0.27610400 | -1.37316600  |
| H | -0.80608800 | -0.04215800 | -2.00253700  |
| C | -3.20113700 | -1.55479700 | 0.63671700   |
| H | -1.42151000 | -2.34628800 | 1.56219300   |
| C | -3.72018900 | -0.81061000 | -0.42200800  |
| H | -3.24490900 | 0.30146000  | -2.20445500  |
| H | -3.86537100 | -1.98661400 | 1.37855900   |
| H | -4.79057700 | -0.65410700 | -0.50781800  |
| C | 0.79096700  | -0.48268000 | 2.29113300   |
| H | -0.28330600 | -0.46539600 | 2.50975700   |
| H | 1.28246200  | -0.82673300 | 3.20912100   |
| O | 2.52525700  | -1.88449300 | -0.58018800  |
| O | 1.07142100  | -1.61140000 | -2.27506800  |
| H | 2.74917200  | -2.88660000 | 1.20230400   |
| B | 1.35948600  | 1.04534200  | 1.97570700   |
| H | 1.06276000  | 1.78000700  | 2.90975500   |
| H | 2.57318000  | 1.03282200  | 1.84664400   |
| C | 0.70023100  | 1.69388900  | 0.65065600   |
| N | -0.56028400 | 2.17400700  | 0.54430600   |
| N | 1.26944400  | 1.93765600  | -0.55272000  |
| C | -0.77480300 | 2.72120600  | -0.70250700  |
| C | -1.59214500 | 2.02813600  | 1.55893900   |
| C | 0.37905100  | 2.57590400  | -1.39435800  |
| C | 2.62079900  | 1.57747500  | -0.96075800  |
| H | -1.72345400 | 3.14605600  | -0.98759200  |
| H | -2.27653100 | 2.87448500  | 1.49356500   |
| H | -2.14066300 | 1.09630100  | 1.39719800   |
| H | -1.12104000 | 2.01232500  | 2.54104200   |
| H | 0.64410800  | 2.85759200  | -2.40050300  |
| H | 2.57388000  | 0.89277500  | -1.80996700  |
| H | 3.17212300  | 2.47695100  | -1.24113300  |
| H | 3.12056300  | 1.09260200  | -0.126085000 |



Peptide Catalyst S6

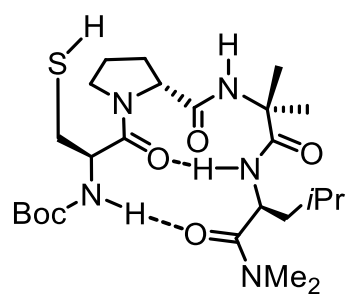

E (PBE0) = -2101.758765

$G_{\text{Corr}}^{\text{D}} = 0.648984$

|   |             |             |             |
|---|-------------|-------------|-------------|
| O | -0.23509400 | -2.17782100 | -0.53133100 |
| O | 4.09935600  | -0.05858600 | -2.07207100 |
| O | 0.98975200  | 2.34117600  | -1.38144000 |
| O | 0.72608300  | 0.41225200  | 1.74143700  |
| O | -4.33935000 | 0.17146400  | 1.13722400  |
| O | -3.88490200 | -1.02906900 | -0.75453800 |
| N | 0.24704800  | -1.11242700 | -2.46602100 |
| N | 2.46341800  | -0.34042600 | -0.52078400 |
| H | 1.96722300  | 0.05480600  | 0.27594400  |
| N | 2.59866700  | 2.29170900  | 0.23368600  |
| H | 2.72011400  | 2.29194000  | 1.23630400  |
| N | -0.73226500 | 1.98340900  | 1.05607900  |
| N | -2.24105300 | -0.59706900 | 0.64953600  |
| H | -1.69036700 | -1.20426900 | 0.03857500  |
| C | 1.14539100  | -0.37259400 | -3.34473500 |
| H | 1.11973600  | 0.69506300  | -3.10241700 |
| H | 0.82052200  | -0.52249200 | -4.37703300 |
| H | 2.17268200  | -0.71964300 | -3.25736900 |
| C | -1.17354500 | -0.95989300 | -2.75233300 |
| H | -1.73639400 | -1.78320900 | -2.31558200 |
| H | -1.31814900 | -0.95582100 | -3.83462000 |
| H | -1.55657100 | -0.01873800 | -2.33983800 |
| C | 0.60686900  | -1.68688100 | -1.29996700 |
| C | 2.09537500  | -1.69493500 | -0.90211000 |
| H | 2.70965700  | -1.96043500 | -1.76433700 |
| C | 3.42462300  | 0.37344500  | -1.13721000 |
| C | 3.71367100  | 1.78164600  | -0.56566000 |
| C | 1.33875400  | 2.49736400  | -0.21554900 |
| C | 0.34009000  | 2.96533300  | 0.85294600  |
| H | 0.85485300  | 3.11262500  | 1.80943900  |
| C | -0.40288100 | 4.23753000  | 0.41273900  |
| H | 0.08421000  | 5.13697100  | 0.79349300  |

|   |             |             |             |
|---|-------------|-------------|-------------|
| H | -0.41261300 | 4.28142200  | -0.68011300 |
| C | -1.82690500 | 4.04306500  | 0.94125800  |
| H | -1.88571300 | 4.30057700  | 2.00383300  |
| H | -2.56252600 | 4.64197800  | 0.40087600  |
| C | -2.05429900 | 2.54585600  | 0.75848300  |
| H | -2.82205700 | 2.14019200  | 1.41700200  |
| H | -2.33030600 | 2.30553400  | -0.27528500 |
| C | -0.44615700 | 0.76893000  | 1.55954800  |
| C | -1.62278500 | -0.16701100 | 1.88399800  |
| H | -2.37962600 | 0.38509000  | 2.44740200  |
| C | -3.56623500 | -0.43722000 | 0.40807800  |
| C | -5.20121300 | -0.86993500 | -1.36681400 |
| C | -5.04894000 | -1.63424400 | -2.67920900 |
| H | -4.26201500 | -1.18842000 | -3.29461200 |
| H | -5.98799900 | -1.60301700 | -3.23870200 |
| H | -4.79189100 | -2.67969400 | -2.48683500 |
| C | -5.47586200 | 0.60830400  | -1.63709500 |
| H | -5.60113800 | 1.16521500  | -0.70748100 |
| H | -6.39129600 | 0.70296200  | -2.22877000 |
| H | -4.65193000 | 1.04665900  | -2.20930200 |
| C | -6.27479400 | -1.51148300 | -0.49071800 |
| H | -6.01368800 | -2.55177300 | -0.27445400 |
| H | -7.22968100 | -1.50174500 | -1.02516600 |
| H | -6.39184700 | -0.97092500 | 0.44915800  |
| C | 2.35354000  | -2.67636000 | 0.24181100  |
| H | 2.04142200  | -3.67638300 | -0.08414300 |
| H | 1.70396400  | -2.40547700 | 1.08062500  |
| C | 3.81070100  | -2.72361000 | 0.71854300  |
| H | 4.09271900  | -1.71277800 | 1.04306400  |
| C | 4.77870100  | -3.15403900 | -0.38761200 |
| H | 4.48816300  | -4.13075500 | -0.79507900 |
| H | 5.79640400  | -3.24672600 | 0.00604300  |
| H | 4.80694900  | -2.43195900 | -1.20905900 |
| C | 3.92171200  | -3.65190600 | 1.93115000  |
| H | 3.25155700  | -3.33564800 | 2.73757600  |
| H | 4.94357300  | -3.66400400 | 2.32421300  |
| H | 3.65625400  | -4.68037400 | 1.65707400  |
| C | -1.16169700 | -1.36816200 | 2.70917900  |
| H | -1.98055800 | -2.08621500 | 2.77439400  |
| H | -0.31745300 | -1.85442800 | 2.21763800  |
| C | 4.91582400  | 1.63549400  | 0.37942800  |
| H | 5.76841600  | 1.23541200  | -0.17237800 |
| H | 5.19117400  | 2.61242900  | 0.78834500  |
| H | 4.68972300  | 0.95416800  | 1.20662400  |

|   |             |             |             |
|---|-------------|-------------|-------------|
| C | 4.04952800  | 2.74697700  | -1.70640600 |
| H | 4.30180500  | 3.72408100  | -1.28478900 |
| H | 4.90288800  | 2.36729600  | -2.26988100 |
| H | 3.20184900  | 2.85910500  | -2.38400600 |
| S | -0.61097700 | -0.92915900 | 4.39362600  |
| H | -1.83067400 | -0.88777200 | 4.95344700  |
